# Supplementary material for: Ligand-controlled divergent formation of alkenyl- or allylboronates catalyzed by Pd, and synthetic applications
Source: Royal Society of Chemistry journal article supplement (doi:10.1039/c4cc04092a), 2014-01-01
Supplement: c4cc04092a1.pdf [file c4cc04092a1.pdf]

## Supporting Information for

# Ligand-controlled divergent formation of alkenyl- or allylboronates catalyzed by Pd, and synthetic applications

Alicia Martos-Redruejo, Ruth López-Durán, Elena Buñuel, Diego J. Cárdenas\*

*Departamento de Química Orgánica, Universidad Autónoma de Madrid, Cantoblanco, 28049  
Madrid, Spain.*

### Table of Contents

|                                                                         |           |
|-------------------------------------------------------------------------|-----------|
| General methods                                                         | S2        |
| Preparation and characterization of precursor allylcarbonates.          | S3-S4     |
| Representative procedure for preparation of allylcarbonates.            | S4-S5     |
| Experimental data of allylcarbonates.                                   | S5-S14    |
| General procedure for synthesis of allylboronates.                      | S14       |
| Experimental data of allylboronates.                                    | S15-S19   |
| General procedure for synthesis of alkenylboronates.                    | S19       |
| Experimental data of alkenylboronates.                                  | S19-S23   |
| Oxidation of alkenylboronate <b>3ef</b> to <b>4</b>                     | S23-S24   |
| Suzuki cross-coupling reactions of allylboronates and experimental data | S24-S27   |
| Suzuki cross-coupling of allylboronates                                 | S27-S29   |
| Synthesis of allylboronate <b>7</b>                                     | S29       |
| Cycloisomerization of allylboronate <b>7</b> .                          | S30       |
| <sup>1</sup> H-NMR and <sup>13</sup> C-NMR spectra.                     | S32-S120  |
| X-ray diffraction analysis.                                             | S121-S140 |
| Computational studies                                                   | S141-S148 |
| References                                                              | S148      |

## General methods.

The solvents used, THF (SDS, anhydrous, analytical grade), DMF (SDS, anhydrous, analytical grade), toluene (SDS, anhydrous, analytical grade), MeOH (SDS, anhydrous, analytical grade), CH<sub>2</sub>Cl<sub>2</sub> (SDS, anhydrous, analytical grade), Et<sub>2</sub>O (SDS, anhydrous, analytical grade), 1,4-dioxane (SDS, anhydrous, analytical grade), xylene (Carlo Erba, mix of isomers) and DMSO (SDS, anhydrous, analytical grade) were further dried by standing with activated 4 Å molecular sieves under Ar atmosphere for several days prior to use. Commercially *n*-pentane RPE (Carlo Erba, analytical grade), *n*-hexane (Scharlab, extra pure), ethyl acetate (Scharlab, extra pure), and diethyl ether (Aldrich, puriss. p.a.) were used as received. Commercially available reagents were used without additional purification. Palladium(II) acetate (Strem Chemicals), bis(pinacolato)diboron (Fluorochem), bis(phenylsulfonyl)methane (Fluorochem), dimethyl malonate (Aldrich), *N*-(*tert*-butoxycarbonyl)-*p*-toluenesulfonamide (TCI), 4-iodobenzonitrile (Acros Organics), cesium fluoride (Aldrich) chloro(triethylphosphine)gold(I) (Strem Chemicals), silver hexafluoroantimonate(V) (Fluorochem), tricyclohexylphosphine (Aldrich), potassium *tert*-butoxide (Fluka), 1,3-bis(2,4,6-trimethylphenyl)imidazolium chloride (Alfa Aesar), potassium carbonate (Panreac), sodium hydride 60 % dispersion in mineral oil (Aldrich), sodium hydroxide (Panreac), hydrogen peroxide solution 33% w/v (Panreac), and 2-butene-1,4-diol (97%) (Acros Organic) were used as received and stored at room temperature.

Dimethyl propargylmalonate (Fluka), tetrakis(triphenylphosphine)palladium(0) (Alfa Aesar), 3-bromo-1-(trimethylsilyl)-1-propyne (Aldrich), 1-bromo-2-butyne (Aldrich), propargyl bromide solution 80 wt. % in toluene (Aldrich), and ethyl-4-bromocrotonate (Aldrich) were used as received and stored at 4 °C. Silicagel 60 (0.40-0.063 mm) was used for flash chromatography purchased from SDS, and TLC-aluminium plates with 0.25 mm of silicagel 60 (F<sub>254</sub>) were used for thin-layer chromatography, purchased from Macherey-Nagel. <sup>1</sup>H-NMR (300 MHz) and <sup>13</sup>C-NMR (75 MHz) spectra were recorded using CDCl<sub>3</sub> (7.26 ppm <sup>1</sup>H, 77.2 ppm <sup>13</sup>C) as internal standard. Bruker AMX-300 was the spectrometer used. Reagents were weighted on air, reactions were performed under Ar and subsequent work-up was performed on air.

## Preparation and characterization of precursor allylcarbonates.

Dimethyl 2-(but-2-ynyl)malonate,<sup>1</sup> dimethyl 2-(3-phenylprop-2-ynyl)malonate,<sup>2</sup> dimethyl 2-(3-(trimethylsilyl)prop-2-yn-1-yl)malonate,<sup>3</sup> *N*-(3-(4-methoxyphenyl)prop-2-yn-1-yl)-4-methylbenzenesulfonamide,<sup>4</sup> *N*-(prop-2-ynyl)-*p*-toluenesulfonamide,<sup>5</sup> *N*-(but-2-ynyl)-*p*-toluenesulfonamide,<sup>1</sup> dimethyl 2-(4-phenylbut-3-yn-1-yl)malonate,<sup>6</sup> dimethyl 2-(3-(4-methoxyphenyl)prop-2-yn-1-yl)malonate,<sup>7</sup> 4-methyl-*N*-(3-(trimethylsilyl)prop-2-yn-1-yl)benzenesulfonamide,<sup>8</sup> (*E*)-4-bromobut-2-en-1-yl methyl carbonate,<sup>9</sup> (*Z*)-4-hydroxybut-2-en-1-yl methyl carbonate,<sup>10</sup> and (pent-3-yne-1,1-diyldisulfonyl)dibenzene<sup>11</sup> were prepared according to previously described procedures.

### (*Z*)-4-bromobut-2-en-1-yl methyl carbonate

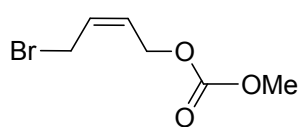

$\text{PBr}_3$  (1.33 mL, 3.83 g, 14.16 mmol) was added to an ice-cooled solution of (*Z*)-4-hydroxybut-2-en-1-yl methyl carbonate (3.0 g, 20.53 mmol) in anhydrous  $\text{Et}_2\text{O}$  (10 mL). The solution was stirred overnight at room temperature and then neutralized with saturated aq  $\text{NaHCO}_3$  solution. The organic layer was washed with brine, dried ( $\text{Na}_2\text{SO}_4$ ), and the solvent was carefully evaporated. The residue was purified by flash chromatography on silica gel (hexane/ $\text{EtOAc}$  2:1, phosphomolybdic acid stain (2.6 mmol/100 mL ethanol)) to afford the title compound as an orange oil (3.94 g, 92%).

$^1\text{H}$  NMR (300 MHz,  $\text{CDCl}_3$ )  $\delta$  6.04 – 5.91 (m, 1H), 5.72 (dt,  $J = 10.8, 6.8$  Hz, 1H), 4.76 (dd,  $J = 6.8, 1.2$  Hz, 2H), 4.02 (d,  $J = 8.4$  Hz, 2H), 3.80 (s, 3H).  $^{13}\text{C}$  NMR (75 MHz,  $\text{CDCl}_3$ )  $^{13}\text{C}$  NMR (75 MHz,  $\text{CDCl}_3$ , DEPT-135)  $\delta$  155.72 (C), 130.51 (CH), 127.61 (CH), 62.56 ( $\text{CH}_2$ ), 55.09 ( $\text{CH}_3$ ), 25.56 ( $\text{CH}_2$ ).

### (*E*)-5,5-bis(phenylsulfonyl)pent-2-en-1-yl methyl carbonate

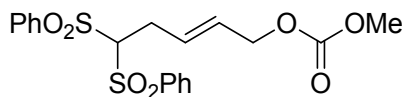

To a suspension of NaH (60% in mineral oil, 115.4 mg, 4.81 mmol) in anhydrous DMF (15 mL) under Ar atmosphere at 0 °C, bis(phenylsulfonyl)methane (1.29 g, 4.37 mmol) was slowly added,

and the mixture was stirred at room temperature for 30 minutes (formation of H<sub>2</sub> bubbles was observed during the addition). Then, the electrophile (*E*)-4-bromobut-2-en-1-yl methyl carbonate (1.0 g, 4.81 mmol), was added dropwise and the mixture was allowed to react at 70 °C for 15 h. Monitoring by TLC indicated reaction completion. Then, water and CH<sub>2</sub>Cl<sub>2</sub> were added into the resulting mixture. The aqueous layer was separated and extracted several times with CH<sub>2</sub>Cl<sub>2</sub>. The combined organic phases were repeatedly washed with water, twice with saturated NaCl aqueous solution, and dried over anhydrous MgSO<sub>4</sub>. The solvent was removed under vacuum and the crude was purified by flash chromatography on silica gel (hexane/EtOAc 2:1, molybdophosphoric acid stain -2.6 mmol/100 mL ethanol-) to afford the title compound as a yellowish oil (1.43 g, 77%).

<sup>1</sup>H NMR (300 MHz, CDCl<sub>3</sub>) δ 8.00 (dd, *J* = 10.5, 3.1 Hz, 4H), 7.75 (t, *J* = 7.4 Hz, 2H), 7.63 (dd, *J* = 9.7, 5.7 Hz, 4H), 5.88 – 5.74 (m, 1H), 5.67 – 5.55 (m, 1H), 4.56 – 4.46 (m, 3H), 3.83 (s, 3H), 2.99 (t, *J* = 6.2 Hz, 2H). <sup>13</sup>C NMR (75 MHz, CDCl<sub>3</sub>, DEPT-135) δ 137.95 (C), 134.88 (C), 129.85 (C), 129.57 (CH), 129.32 (CH), 129.06 (CH), 128.16 (CH), 83.50 (CH), 67.46 (CH<sub>2</sub>), 55.01 (CH<sub>3</sub>), 28.68 (CH<sub>2</sub>). HRMS-ESI: [MNa]<sup>+</sup> Calcd. for C<sub>19</sub>H<sub>20</sub>O<sub>7</sub>SNa: 447.0542; found: 447.0533.

### Representative procedure for preparation of allylcarbonates.

The general alkylation procedure for the synthesis of **1a-q** is described below.

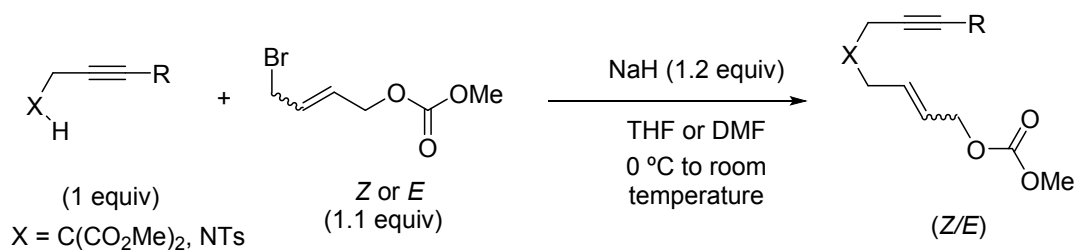

Scheme S1

To a suspension of NaH (60% in mineral oil, 1.1 equiv) in anhydrous THF or DMF (solvent and volume will be indicated in every case) under Ar atmosphere at 0 °C, the corresponding propargyl derivative was slowly added (1 equiv) and the mixture was stirred at room temperature for 15 minutes (formation of H<sub>2</sub> bubbles was observed during

the addition). Then, the electrophile (*E*)-4-bromobut-2-en-1-yl methyl carbonate or (*Z*)-4-bromobut-2-en-1-yl methyl carbonate (1.2 equiv), was added dropwise and the mixture was allowed to react at room temperature. The reaction progress was monitored by TLC. Then, when using THF, most of the solvent was removed under vacuum and later, water and Et<sub>2</sub>O were added into the resulting mixture. The aqueous layer was separated and extracted successively with Et<sub>2</sub>O. In the case of using DMF, similar extractive work-up with CH<sub>2</sub>Cl<sub>2</sub>/water was employed. The combined organic phases were washed several times with water and twice with saturated aqueous solution of NaCl. In all the cases, the combined organic phases were dried over anhydrous MgSO<sub>4</sub>. Solvent was removed under vacuum and the crude was purified by flash chromatography.

### Experimental data of allylcarbonates.

#### (*E*)-Dimethyl 2-(but-2-yn-1-yl)-2-(4-((methoxycarbonyl)oxy)but-2-en-1-yl)malonate (1a)

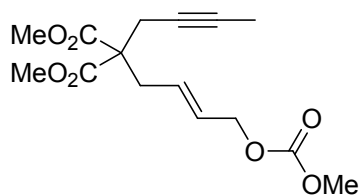

Following the *general alkylation procedure* for the synthesis of allylcarbonates (8 h) and using THF (10 mL) as solvent, from **dimethyl 2-(prop-2-yn-1-yl)malonate** (574 mg, 3.35 mmol) and (*E*)-4-bromobut-2-en-1-yl methyl carbonate (772 mg, 3.71 mmol). Product **1a** was obtained as a colourless oil (450 mg, 39 %) by flash chromatography using hexane/EtOAc 15:1 as eluent.

<sup>1</sup>H NMR (300 MHz, CDCl<sub>3</sub>) δ 5.80 – 5.57 (m, 2H), 4.56 (d, *J* = 5.5 Hz, 2H), 3.78 (s, 3H), 3.73 (s, 6H), 2.78 (t, *J* = 7.6 Hz, 2H), 2.72 (d, *J* = 2.5 Hz, 2H), 1.75 (t, *J* = 2.5 Hz, 3H).

<sup>13</sup>C NMR (75 MHz, CDCl<sub>3</sub>, DEPT-135) δ 170.38 (C), 155.64 (C), 129.91 (CH), 128.37 (CH), 79.26 (C), 73.16 (C), 67.96 (CH<sub>2</sub>), 57.29 (CH<sub>3</sub>), 54.85 (C), 52.80 (CH<sub>3</sub>), 35.23 (CH<sub>2</sub>), 23.32 (CH<sub>2</sub>), 3.56 (CH<sub>3</sub>). HRMS-ESI: [MNa]<sup>+</sup> Calcd. for C<sub>15</sub>H<sub>20</sub>O<sub>7</sub>Na: 335.1101; found: 335.1106.

**(Z)-Dimethyl 2-(but-2-yn-1-yl)-2-(4-((methoxycarbonyloxy)but-2-en-1-yl)malonate (1b)**

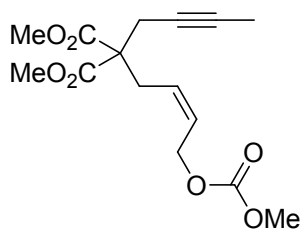

Following the *general alkylation procedure* for the synthesis of allylcarbonates (8 h) and using THF (15 mL) as solvent, from **dimethyl 2-(prop-2-yn-1-yl)malonate** (839 mg, 4.92 mmol), and **(Z)-4-bromobut-2-en-1-yl methyl carbonate** (1.1 g, 5.28 mmol). Product **1b** was obtained as a colourless oil (550 mg,

39%) by flash chromatography using hexane/EtOAc 15:1 as eluent.

$^1\text{H}$  NMR (300 MHz,  $\text{CDCl}_3$ )  $\delta$  5.80 – 5.60 (m, 1H), 5.56 – 5.36 (m, 1H), 4.72 (d,  $J = 6.8$  Hz, 2H), 3.76 (s, 3H), 3.71 (s, 6H), 2.85 (d,  $J = 7.9$  Hz, 2H), 2.71 (d,  $J = 2.5$  Hz, 2H), 1.72 (dd,  $J = 12.6, 10.1$  Hz, 3H).  $^{13}\text{C}$  NMR (75 MHz,  $\text{CDCl}_3$ , DEPT-135)  $\delta$  170.36 (C), 155.79 (C), 128.23 (CH), 127.67 (CH), 79.42 (C), 73.20 (C), 63.64 ( $\text{CH}_2$ ), 57.03 (C), 54.86 ( $\text{CH}_3$ ), 52.90 ( $\text{CH}_3$ ), 30.44 ( $\text{CH}_2$ ), 23.24 ( $\text{CH}_2$ ), 3.52 ( $\text{CH}_3$ ). HRMS-ESI:  $[\text{MNa}]^+$  Calcd. for  $\text{C}_{15}\text{H}_{20}\text{O}_7\text{Na}$ : 335.1101; found: 335.1107.

**(E)-Dimethyl 2-(4-((methoxycarbonyloxy)but-2-en-1-yl)-2-(3-phenylprop-2-yn-1-yl)malonate (1c)**

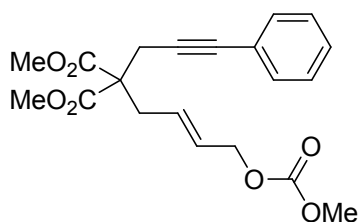

Following the *general alkylation procedure* for the synthesis of allylcarbonates (8 h) and using THF (10 mL) as solvent, from **dimethyl 2-(prop-2-yn-1-yl)malonate** (1.0 g, 4.06 mmol), and **(E)-4-bromobut-2-en-1-yl methyl carbonate**

(1.0 g, 4.80 mmol). Compound **1c** was obtained as a colourless oil (1.07 g, 66%) by flash chromatography using hexane/EtOAc 15:1 as eluent

$^1\text{H}$  NMR (300 MHz,  $\text{CDCl}_3$ )  $\delta$  7.37 – 7.30 (m, 2H), 7.28 – 7.22 (m, 3H), 5.81 – 5.60 (m, 2H), 4.55 (d,  $J = 5.2$  Hz, 2H), 3.74 (s, 3H), 3.73 (s, 6H), 2.98 (s, 2H), 2.85 (d,  $J = 6.3$  Hz, 2H).  $^{13}\text{C}$  NMR (75 MHz,  $\text{CDCl}_3$ , DEPT-135)  $\delta$  170.21 (C), 155.63 (C), 131.74 (CH), 129.66 (CH), 128.66 (CH), 128.32 (CH), 128.16 (CH), 123.15 (C), 84.05 (C), 83.92 (C), 67.90 ( $\text{CH}_2$ ), 57.33 (C), 54.87 ( $\text{CH}_3$ ), 52.93 ( $\text{CH}_3$ ), 35.44 ( $\text{CH}_2$ ), 23.92 ( $\text{CH}_2$ ). HRMS-ESI:  $[\text{MH}]^+$  Calcd. for  $\text{C}_{20}\text{H}_{23}\text{O}_7$ : 375.1438; found: 375.1457.

**(Z)-dimethyl 2-(4-((methoxycarbonyloxy)but-2-en-1-yl)-2-(3-phenylprop-2-yn-1-yl)malonate (1d)**

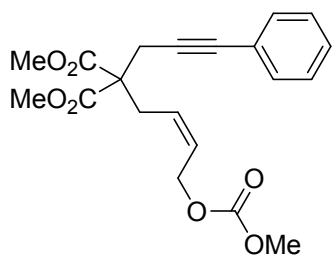

Following the *general alkylation procedure* for the synthesis of allylcarbonates (14 h) and using THF (8 mL) as solvent, from **dimethyl 2-(prop-2-yn-1-yl)malonate** (643 mg, 2.61 mmol), and **(E)-4-bromobut-2-en-1-yl methyl carbonate** (600 mg, 2.87 mmol). Compound **1d** was obtained as a yellowish oil (665 mg, 68%) by flash chromatography using hexane/EtOAc 8:1 as eluent.

<sup>1</sup>H NMR (300 MHz, CDCl<sub>3</sub>) δ 7.37 (dd, *J* = 6.7, 3.1 Hz, 2H), 7.30 – 7.26 (m, 3H), 5.83 – 5.69 (m, 1H), 5.55 (dd, *J* = 19.0, 8.0 Hz, 1H), 4.75 (d, *J* = 6.8 Hz, 2H), 3.77 (s, 6H), 3.75 (s, 3H), 3.02 (s, 2H), 2.95 (d, *J* = 7.8 Hz, 2H). <sup>13</sup>C NMR (75 MHz, CDCl<sub>3</sub>, DEPT-135) δ 170.25 (C), 155.79 (C), 131.84 (CH), 128.38 (CH), 128.25 (CH), 128.20 (CH), 127.92 (CH), 123.12 (C), 84.01 (C), 63.57 (CH<sub>2</sub>), 57.23 (C), 54.91 (CH<sub>3</sub>), 53.07 (CH<sub>3</sub>), 30.66 (CH<sub>2</sub>), 23.97 (CH<sub>2</sub>).

**(E)-4-(N-(but-2-yn-1-yl)-4-methylphenylsulfonamido)but-2-en-1-yl methyl carbonate (1e)**

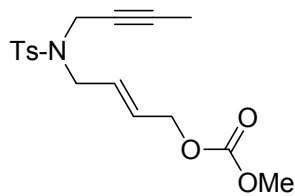

Following the *general alkylation procedure* for the synthesis of allylcarbonates (8 h) and using DMF (10 mL) as solvent, from **N-(but-2-yn-1-yl)-4-methylbenzenesulfonamide** (711 mg, 3.43 mmol), and **(E)-4-bromobut-2-en-1-yl methyl carbonate** (835 mg, 4.01 mmol). Product **1e** was obtained as a yellowish oil (550 mg, 46%) by flash chromatography using hexane/EtOAc 15:1 as eluent.

<sup>1</sup>H NMR (300 MHz, CDCl<sub>3</sub>) δ 7.74 – 7.68 (m, 2H), 7.31 – 7.25 (m, 2H), 5.75 (qt, *J* = 15.5, 5.8 Hz, 2H), 4.59 (dd, *J* = 5.5, 0.8 Hz, 2H), 4.02 – 3.96 (m, 2H), 3.82 – 3.74 (m, 5H), 2.41 (s, 3H), 1.53 (t, *J* = 2.4 Hz, 3H). <sup>13</sup>C NMR (75 MHz, CDCl<sub>3</sub>, DEPT-135) δ 155.63 (C), 143.47 (C), 136.29 (C), 129.42 (CH), 129.25 (CH), 128.42 (CH), 128.00 (CH), 81.89 (C), 71.73 (C), 67.36 (CH<sub>2</sub>), 54.99 (CH<sub>3</sub>), 47.75 (CH<sub>2</sub>), 36.72 (CH<sub>2</sub>), 21.63 (CH<sub>3</sub>), 3.35 (CH<sub>3</sub>). HRMS-ESI: [MNa]<sup>+</sup> Calcd. for C<sub>17</sub>H<sub>21</sub>NO<sub>5</sub>NaS: 374.1032; found: 374.1048.

**(Z)/(E)-4-(N-(but-2-yn-1-yl)-4-methylphenylsulfonamido)but-2-en-1-yl methyl carbonate (1f)**

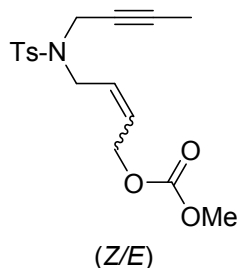

Following the *general alkylation procedure* for the synthesis of allylcarbonates (8 h) and using DMF (10 mL) as solvent, from *N*-**(but-2-yn-1-yl)-4-methylbenzenesulfonamide** (711 mg, 3.43 mmol), and **(Z)-4-bromobut-2-en-1-yl methyl carbonate** (835 mg, 4.01 mmol). The mixture of the two isomers of **1f** (*Z/E* 1:1.4) was obtained as a yellowish oil (250 g, 25%) by flash chromatography using hexane/EtOAc 15:1 as eluent. The mixture of two isomers was confirmed by GC-MS.

$^1\text{H}$  NMR (300 MHz,  $\text{CDCl}_3$ )  $\delta$  7.61 (dd,  $J = 8.2, 2.6$  Hz, 2H), 7.29 – 7.12 (m, 2H), 5.77 – 5.44 (m, 2H), 4.60 (d,  $J = 6.6$  Hz, 1H), 4.48 (d,  $J = 5.4$  Hz, 1H), 3.92 - 3.85 (m, 2H), 3.78 (d,  $J = 7.2$  Hz, 1H), 3.70 (d,  $J = 5.9$  Hz, 1H), 3.65 (d,  $J = 3.0$  Hz, 3H), 2.30 (s, 3H), 1.44 – 1.41 (q,  $J = 2.8$  Hz, 3H).  $^{13}\text{C}$  NMR (75 MHz,  $\text{CDCl}_3$ , DEPT-135)  $\delta$  155.29 (C), 155.20 (C), 143.28 (C), 143.19 (C), 135.84 (C), 135.55 (C), 129.16 (CH), 129.10 (CH), 128.69 (CH), 128.48 (CH), 128.14 (CH), 128.12 (CH), 127.62 (CH), 127.58 (CH), 81.83 (C), 81.62 (C), 71.31 (C), 71.23 (C), 66.92 ( $\text{CH}_2$ ), 62.78 ( $\text{CH}_2$ ), 54.54 ( $\text{CH}_3$ ), 47.44 ( $\text{CH}_3$ ), 42.86 ( $\text{CH}_3$ ), 36.41 ( $\text{CH}_2$ ), 36.36 ( $\text{CH}_2$ ), 21.19 ( $\text{CH}_3$ ), 2.92 ( $\text{CH}_3$ ), 2.87 ( $\text{CH}_3$ ). HRMS-ESI:  $[\text{MNa}]^+$  Calcd. for  $\text{C}_{17}\text{H}_{21}\text{NO}_5\text{SNa}$ : 374.1032; found: 374.1025.

**(Z/E)-methyl (4-(4-methyl-N-(3-(trimethylsilyl)prop-2-yn-1-yl)phenylsulfonamido)but-2-en-1-yl) carbonate (1g)**

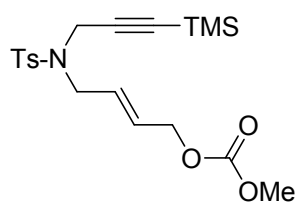

Following the *general alkylation procedure* for the synthesis of allylcarbonates (8 h) and using DMF (10 mL) as solvent from **4-methyl-N-(3-(trimethylsilyl)prop-2-yn-1-yl)benzenesulfonamide** (1.31 g, 4.65 mmol), and **(E)-4-bromobut-2-en-1-yl methyl carbonate** (1.16 g, 5.57 mmol). Product **1g** (*Z/E* 0.09:1) was obtained as a yellowish oil yellowish oil (450 mg, 25%) by flash chromatography using hexane/EtOAc 1:15 as eluent.

$^1\text{H}$  NMR (300 MHz,  $\text{CDCl}_3$ )  $\delta$  7.73 (dd,  $J = 12.2, 8.7$  Hz, 2H), 7.35 – 7.23 (m, 2H), 5.94 – 5.63 (m, 2H), 4.62 (dd,  $J = 9.8, 4.0$  Hz, 2H), 4.08 (s, 2H), 3.87 – 3.74 (m, 5H), 2.41 (s, 3H), -0.01 (s, 9H).  $^{13}\text{C}$  NMR (75 MHz,  $\text{CDCl}_3$ , DEPT-135)  $\delta$  155.61 (C), 143.59 (C), 136.10 (C), 129.66 (CH), 128.86 (CH), 128.74 (CH), 127.91 (CH), 97.84 (C), 91.28 (C),



67.30 (CH<sub>2</sub>), 54.98 (CH<sub>3</sub>), 47.72 (CH<sub>2</sub>), 37.14 (CH<sub>2</sub>), 21.64 (CH<sub>3</sub>), -0.30 (CH<sub>3</sub>). HRMS-ESI: [MH]<sup>+</sup> Calcd. for C<sub>19</sub>H<sub>28</sub>NO<sub>5</sub>SiS: 410.1451; found: 410.1474.

**(Z/E)-methyl (4-(4-methyl-N-(3-(trimethylsilyl)prop-2-yn-1-yl)phenylsulfonamido)but-2-en-1-yl) carbonate (1h)**

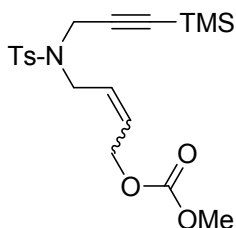

Following the *general alkylation procedure* for the synthesis of allylcarbonates (8 h) and using DMF (10 mL) as solvent, from **4-methyl-N-(3-(trimethylsilyl)prop-2-yn-1-yl)benzenesulfonamide** (1.31 g, 4.65 mmol), and **(Z)-4-bromobut-2-en-1-yl methyl carbonate** (1.16 g, 5.57 mmol). **1h** (Z/E 0.4:1) was obtained as a yellowish oil yellowish oil (400 mg, 22%) by flash chromatography using hexane/EtOAc 15:1 as eluent. The presence of isomers was confirmed by GC-MS.

<sup>1</sup>H NMR (300 MHz, CDCl<sub>3</sub>) δ 7.72 – 7.59 (m, 2H), 7.29 – 7.16 (m, 2H), 5.87 – 5.47 (m, 2H), 4.71 – 4.48 (m, 2H), 4.06 – 3.96 (m, 2H), 3.89 – 3.72 (m, 2H), 3.69 (d, *J* = 3.7 Hz, 3H), 2.34 (s, 3H), -0.08 (d, *J* = 0.7 Hz, 9H). <sup>13</sup>C NMR (75 MHz, CDCl<sub>3</sub>, DEPT-135) δ 155.35 (C), 143.47 (C), 143.39 (C), 135.85 (C), 135.63 (C), 129.52 (CH), 129.46 (CH), 129.35 (CH), 128.59 (CH), 128.54 (CH), 128.45 (CH), 127.72 (CH), 127.67 (CH), 97.64 (C), 97.56 (C), 91.14 (C), 91.02 (C), 67.04 (CH<sub>2</sub>), 66.92 (CH<sub>2</sub>), 62.87 (CH<sub>2</sub>), 54.70 (CH<sub>3</sub>), 47.54 (CH<sub>2</sub>), 42.96 (CH<sub>2</sub>), 36.91 (CH<sub>2</sub>), 36.80 (CH<sub>2</sub>), 21.39 (CH<sub>3</sub>), -0.53 (CH<sub>3</sub>), -0.64 (CH<sub>3</sub>). HRMS-ESI: [MH]<sup>+</sup> Calcd. for C<sub>19</sub>H<sub>28</sub>NO<sub>5</sub>SiS: 410.1451; found: 410.1474.

**(Z)-methyl (4-(4-methyl-N-(3-(trimethylsilyl)prop-2-yn-1-yl)phenylsulfonamido)but-2-en-1-yl) carbonate (1i)**

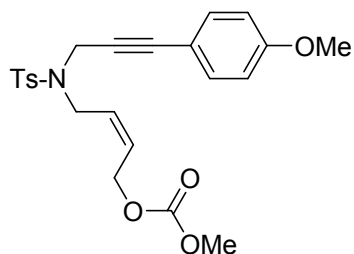

Following the *general alkylation procedure* for the synthesis of allylcarbonates (12 h) and using DMF (10 mL) as solvent, from **N-(3-(4-methoxyphenyl)prop-2-yn-1-yl)-4-methylbenzenesulfonamide** (530 mg, 1.68 mmol), and **(Z)-4-bromobut-2-en-1-yl methyl carbonate** (386.4 mg, 1.85 mmol). Product **1i** was obtained as a yellowish oil yellowish oil (561 mg, 75%) by flash chromatography using hexane/EtOAc 6:1 as eluent.

$^1\text{H}$  NMR (300 MHz,  $\text{CDCl}_3$ )  $\delta$  7.77 (d,  $J$  = 8.3 Hz, 2H), 7.30 – 7.24 (m, 2H), 7.03 (d,  $J$  = 8.7 Hz, 2H), 6.77 (d,  $J$  = 8.7 Hz, 2H), 5.85 (dt,  $J$  = 13.2, 6.3 Hz, 1H), 5.70 (dt,  $J$  = 11.0, 7.2 Hz, 1H), 4.74 (d,  $J$  = 6.7 Hz, 2H), 4.29 (s, 2H), 3.98 (d,  $J$  = 7.1 Hz, 2H), 3.79 (s, 3H), 3.73 (s, 3H), 2.36 (s, 3H).  $^{13}\text{C}$  NMR (75 MHz,  $\text{CDCl}_3$ , DEPT-135)  $\delta$  159.90 (C), 155.67 (C), 143.74 (C), 135.95 (C), 133.18 (CH), 129.74 (CH), 129.00 (CH), 128.69 (CH), 128.02 (CH), 114.26 (C), 113.93 (CH), 85.95 (C), 80.18 (C), 63.15 ( $\text{CH}_2$ ), 55.44 ( $\text{CH}_3$ ), 54.98 ( $\text{CH}_3$ ), 43.41 ( $\text{CH}_2$ ), 37.24 ( $\text{CH}_2$ ), 21.62 ( $\text{CH}_3$ ). HRMS-ESI:  $[\text{MH}]^+$  Calcd. for  $\text{C}_{23}\text{H}_{26}\text{NO}_6\text{S}$ : 444.1475; found: 444.1495.

**(Z)-dimethyl 2-(4-((methoxycarbonyloxy)but-2-en-1-yl)-2-(3-phenylprop-2-yn-1-yl)malonate (1j)**

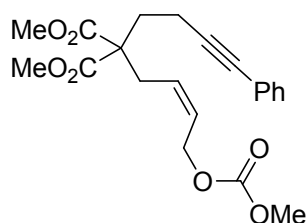

Following the *general alkylation procedure* for the synthesis of allylcarbonates (13 h) and using THF (8 mL) as solvent, from **dimethyl 2-(4-phenylbut-3-yn-1-yl)malonate** (567.3 mg, 2.18 mmol), and **(Z)-4-bromobut-2-en-1-yl methyl carbonate** (501.5 mg, 2.40 mmol) Compound **1j** was obtained as a yellowish oil (626.8 mg, 74%) by flash chromatography using hexane/EtOAc 6:1 as eluent.

$^1\text{H}$  NMR (300 MHz,  $\text{CDCl}_3$ )  $\delta$  7.41 – 7.36 (m, 2H), 7.29 – 7.26 (m, 3H), 5.80 – 5.66 (m, 1H), 5.65 – 5.51 (m, 1H), 4.70 (d,  $J$  = 6.8 Hz, 2H), 3.77 (s, 3H), 3.73 (s, 6H), 2.80 (d,  $J$  = 7.4 Hz, 2H), 2.49 – 2.36 (m, 2H), 2.31 – 2.21 (m, 2H).  $^{13}\text{C}$  NMR (75 MHz,  $\text{CDCl}_3$ , DEPT-135)  $\delta$  171.15 (C), 155.84 (C), 131.70 (CH), 128.54 (CH), 128.36 (CH), 127.90 (CH), 127.17 (CH), 123.75 (C), 88.57 (C), 81.33 (C), 63.43 ( $\text{CH}_2$ ), 57.07 (C), 54.97 ( $\text{CH}_3$ ), 52.82 ( $\text{CH}_3$ ), 32.11 ( $\text{CH}_2$ ), 31.22 ( $\text{CH}_2$ ), 15.14 ( $\text{CH}_2$ ). HRMS-ESI:  $[\text{MH}]^+$  Calcd. for  $\text{C}_{21}\text{H}_{25}\text{O}_7$ : 389.1594; found: 389.1612.

**(E)-dimethyl 2-allyl-2-(4-((methoxycarbonyloxy)but-2-en-1-yl)malonate (1k)**

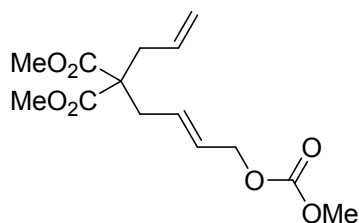

Following the *general alkylation procedure* for the synthesis of allylcarbonates (8 h) and using THF (20 mL) as solvent, from **dimethyl 2-allylmalonate** (989 mg, 5.74 mmol), and **(E)-4-bromobut-2-en-1-yl methyl carbonate** (1.45 g, 4.83 mmol). Compound **1k** was obtained as a

colourless oil (550 mg, 32%) by flash chromatography using hexane/EtOAc 15:1 as eluent.

$^1\text{H}$  NMR (300 MHz,  $\text{CDCl}_3$ )  $\delta$  5.72 – 5.57 (m, 3H), 5.14 – 5.05 (m, 2H), 4.55 (d,  $J$  = 3.9 Hz, 2H), 3.78 (s, 3H), 3.71 (s, 6H), 2.68 – 2.58 (m, 4H).  $^{13}\text{C}$  NMR (75 MHz,  $\text{CDCl}_3$ , DEPT-135)  $\delta$  171.01 (C), 155.60 (C), 132.15 (CH), 130.19 (CH), 128.08 (CH), 119.45 ( $\text{CH}_2$ ), 67.92 ( $\text{CH}_2$ ), 57.64 (C), 54.81 ( $\text{CH}_3$ ), 52.48 ( $\text{CH}_3$ ), 37.21 ( $\text{CH}_2$ ), 35.58 ( $\text{CH}_2$ ). HRMS-ESI:  $[\text{MNa}]^+$  Calcd. for  $\text{C}_{14}\text{H}_{20}\text{O}_7\text{Na}$ : 323.1101; found: 323.1103.

### **(E)-dimethyl 2-(4-((methoxycarbonyloxy)but-2-en-1-yl)malonate (11)**

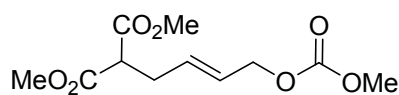

Following the *general alkylation procedure* for the synthesis of allylcarbonates (8 h) and using THF (25 mL) as solvent, from **dimethyl malonate** (3.36 g, 25.44 mmol), and **(E)-4-bromobut-2-en-1-yl methyl carbonate** (5.30 g, 25.60 mmol). Compound **11** was obtained as a colourless oil (1.6 g, 11%) by flash chromatography using hexane/EtOAc 15:1 as eluent.

$^1\text{H}$  NMR (300 MHz,  $\text{CDCl}_3$ )  $\delta$  5.83 – 5.54 (m, 2H), 4.50 (d,  $J$  = 5.5 Hz, 2H), 3.72 (s, 3H), 3.68 (s, 6H), 3.40 (t,  $J$  = 7.5 Hz, 1H), 2.60 (t,  $J$  = 6.8 Hz, 2H).  $^{13}\text{C}$  NMR (75 MHz,  $\text{CDCl}_3$ , DEPT-135)  $\delta$  169.06 (C), 155.55 (C), 131.51 (CH), 126.72 (CH), 67.81 ( $\text{CH}_2$ ), 54.76 ( $\text{CH}_3$ ), 52.57 (CH), 51.22 ( $\text{CH}_3$ ), 31.42 ( $\text{CH}_2$ ). HRMS-ESI:  $[\text{MNa}]^+$  Calcd. for  $\text{C}_{11}\text{H}_{16}\text{O}_7\text{Na}$ : 283.0788; found: 283.0795.

### **(E)-dimethyl 2-(4-((methoxycarbonyloxy)but-2-en-1-yl)-2-(3-(4-methoxyphenyl)prop-2-yn-1-yl)malonate (1m)**

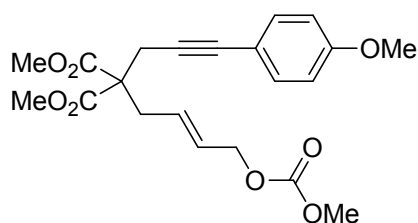

Following the *general alkylation procedure* for the synthesis of allylcarbonates (12 h) and using THF (15 mL) as solvent, from **dimethyl 2-(prop-2-yn-1-yl)malonate** (623 mg, 2.26 mmol), and **(E)-4-bromobut-2-en-1-yl methyl carbonate** (469 mg, 2.26 mmol). Product **1m** was obtained as a colourless oil (200 mg, 22%) by flash chromatography using hexane/EtOAc 6:1 as eluent.

$^1\text{H}$  NMR (300 MHz,  $\text{CDCl}_3$ )  $\delta$  7.29 (dq,  $J = 6.8, 2.4$  Hz, 2H), 6.85 – 6.77 (m, 2H), 5.83 – 5.62 (m, 2H), 4.57 (d,  $J = 5.1$  Hz, 2H), 3.80 (s, 3H), 3.78 (s, 3H), 3.76 (d,  $J = 2.9$  Hz, 6H), 2.98 (s, 2H), 2.87 (d,  $J = 6.2$  Hz, 2H).  $^{13}\text{C}$  NMR (76 MHz,  $\text{CDCl}_3$ , DEPT-135)  $\delta$  170.34 (C), 158.87 (C), 155.70 (C), 133.19 (C), 129.86 (CH), 128.63 (CH), 115.39 (C), 114.01 (CH), 83.79 (C), 82.50 (C), 68.00 ( $\text{CH}_2$ ), 57.47 (C), 55.44 ( $\text{CH}_3$ ), 54.92 ( $\text{CH}_3$ ), 52.94 ( $\text{CH}_3$ ), 35.50 ( $\text{CH}_2$ ), 24.04 ( $\text{CH}_2$ ). HRMS-ESI:  $[\text{MNa}]^+$  Calcd. for  $\text{C}_{21}\text{H}_{24}\text{O}_8\text{Na}$ : 427.1363; found: 427.1377.

**(Z)-dimethyl 2-(4-((methoxycarbonyloxy)but-2-en-1-yl)-2-(3-(4-methoxyphenyl)prop-2-yn-1-yl)malonate (1n)**

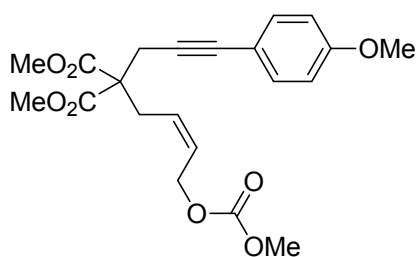

Following the *general alkylation procedure* for the synthesis of allylcarbonates (20 h) and using THF (15 mL) as solvent, from **dimethyl 2-(prop-2-yn-1-yl)malonate** (1.2 g, 4.35 mmol) and **(Z)-4-bromobut-2-en-1-yl methyl carbonate** (1.0 g, 4.78 mmol).

Compound **1n** was obtained as a yellowish oil (1.2 g, 68%) by flash chromatography using hexane/EtOAc 8:1 as eluent.

$^1\text{H}$  NMR (300 MHz,  $\text{CDCl}_3$ )  $\delta$  7.33 – 7.27 (m, 2H), 6.84 – 6.76 (m, 2H), 5.83 – 5.68 (m, 1H), 5.61 – 5.48 (m, 1H), 4.75 (dd,  $J = 6.8, 1.1$  Hz, 2H), 3.79 (s, 3H), 3.76 (s, 6H), 3.75 (s, 3H), 3.00 (s, 2H), 2.94 (d,  $J = 7.9$  Hz, 2H).  $^{13}\text{C}$  NMR (75 MHz,  $\text{CDCl}_3$ , DEPT-135)  $\delta$  170.30 (C), 159.61 (C), 155.78 (C), 133.21 (CH), 128.25 (CH), 127.86 (CH), 115.26 (C), 114.00 (CH), 83.80 (C), 82.38 (C), 63.58 ( $\text{CH}_2$ ), 57.25 (C), 55.41 ( $\text{CH}_3$ ), 54.89 ( $\text{CH}_3$ ), 53.02 ( $\text{CH}_3$ ), 30.63 ( $\text{CH}_2$ ), 23.97 ( $\text{CH}_2$ ). HRMS-ESI:  $[\text{MH}]^+$  Calcd. for  $\text{C}_{21}\text{H}_{25}\text{O}_8$ : 405.1543; found: 405.1567.

**(E)-methyl (4-(4-methyl-N-(prop-2-yn-1-yl)phenylsulfonamido)but-2-en-1-yl) carbonate (1o)**

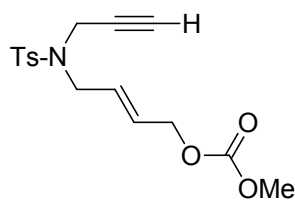

Following the *general alkylation procedure* for the synthesis of allylcarbonates (13 h) and using DMF (10 mL) as solvent, from **4-methyl-N-(prop-2-yn-1-yl)benzene sulfonamide** (400 mg, 1.91 mmol) and **(E)-4-bromobut-2-en-1-yl methyl carbonate**

(437.7 mg, 2.10 mmol). Compound **1o** was obtained as a yellowish oil (406.3 mg, 63%) by flash chromatography using hexane/EtOAc 6:1 as eluent.

<sup>1</sup>H NMR (300 MHz, CDCl<sub>3</sub>) δ 7.71 (d, *J* = 7.9 Hz, 2H), 7.32 – 7.23 (m, 2H), 5.90 – 5.63 (m, 2H), 4.59 (d, *J* = 5.5 Hz, 2H), 4.06 (d, *J* = 1.2 Hz, 2H), 3.83 (d, *J* = 6.1 Hz, 2H), 3.78 – 3.74 (m, 3H), 2.41 (s, 3H), 2.03 (t, *J* = 2.4 Hz, 1H). <sup>13</sup>C NMR (75 MHz, CDCl<sub>3</sub>, DEPT-135) δ 155.45 (C), 143.70 (C), 135.90 (C), 129.54 (CH), 128.78 (CH), 128.54 (CH), 127.71 (CH), 76.41 (C), 74.02 (CH), 67.10 (CH<sub>2</sub>), 54.85 (CH<sub>3</sub>), 47.63 (CH<sub>2</sub>), 36.00 (CH<sub>2</sub>), 21.52 (CH<sub>3</sub>). HRMS-ESI: [MNa]<sup>+</sup> Calcd. for C<sub>16</sub>H<sub>19</sub>NO<sub>5</sub>NaS: 360.0876; found: 360.0868.

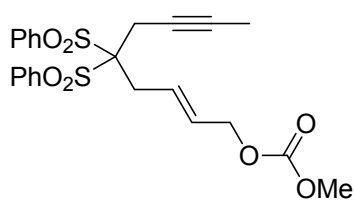

**(E)-5,5-bis(phenylsulfonyl)non-2-en-7-yn-1-yl methyl carbonate (1p)**

Following the *general alkylation procedure* for the synthesis of allylcarbonates (13 h, 70 °C) and using DMF (10 mL) as solvent, from **(pent-3-yne-1,1-diylldisulfonyl)dibenzene** (594 mg, 1.70 mmol) and **(E)-4-bromobut-2-en-1-yl methyl carbonate** (390 mg, 1.88 mmol). Compound **1p** was obtained as a yellowish oil (476.5 mg, 77%) by flash chromatography using hexane/EtOAc 4:1 as eluent.

<sup>1</sup>H NMR (300 MHz, CDCl<sub>3</sub>) δ 8.08 (d, *J* = 7.5 Hz, 4H), 7.70 (t, *J* = 7.4 Hz, 2H), 7.58 (t, *J* = 7.7 Hz, 4H), 6.13 – 5.96 (m, 1H), 5.87 – 5.70 (m, 1H), 4.63 (d, *J* = 6.1 Hz, 2H), 3.79 (s, 3H), 3.13 (d, *J* = 2.5 Hz, 2H), 3.08 (d, *J* = 7.1 Hz, 2H), 1.62 (t, *J* = 2.4 Hz, 3H). <sup>13</sup>C NMR (75 MHz, CDCl<sub>3</sub>, DEPT-135) δ 155.62 (C), 137.02 (C), 134.79 (CH), 131.61 (CH), 129.71 (CH), 129.42 (CH), 129.22 (CH), 128.61 (CH), 127.57 (CH), 88.95 (C), 82.18 (CH), 70.65 (CH), 67.83 (CH<sub>2</sub>), 54.89 (CH<sub>3</sub>), 32.53 (CH<sub>2</sub>), 21.43 (CH<sub>2</sub>), 3.65 (CH<sub>3</sub>). HRMS-ESI: [MNa]<sup>+</sup> Calcd. for C<sub>23</sub>H<sub>24</sub>O<sub>7</sub>NaS<sub>2</sub>: 499.0855; found: 499.0836.

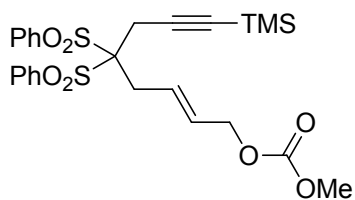

**(E)-5,5-bis(phenylsulfonyl)-8-(trimethylsilyl)oct-2-en-7-yn-1-yl methyl carbonate (1q)**

To a suspension of NaH (60% in mineral oil, 1.2 equiv) in anhydrous DMF under Ar atmosphere at 0 °C, **(E)-5,5-bis(phenylsulfonyl)pent-2-en-1-yl methyl carbonate** (500 mg, 1.18 mmol) was slowly added, and the mixture was stirred at room temperature for 30 minutes (formation of H<sub>2</sub> bubbles were observed during the addition). Then, **(3-bromoprop-1-yn-1-yl)trimethylsilane** (247.6 mg, 1.29 mmol), was added dropwise and

the mixture was allowed to react at 70 °C for 15 h. Monitoring by TLC indicated completion of the reaction. Then, water and CH<sub>2</sub>Cl<sub>2</sub> were added into the resulting mixture. The aqueous layer was separated and extracted several times with CH<sub>2</sub>Cl<sub>2</sub>. The combined organic phases were repeatedly washed with water and twice with saturated aqueous solution of NaCl. The combined organic phases were dried over anhydrous MgSO<sub>4</sub>. The solvent was removed under vacuum and the crude was purified by flash chromatography on silica gel (hexane/EtOAc 2:1, molybdophosphoric acid as stain -2.6 mmol/100 mL ethanol-) to afford the title compound **1q** as a white solid (396.8 mg, 63%).

<sup>1</sup>H NMR (300 MHz, CDCl<sub>3</sub>) δ 8.13 – 8.06 (m, 4H), 7.76 – 7.67 (m, 2H), 7.561 – 7.54 (m, 4H), 6.14 – 6.02 (m, 1H), 5.88 – 5.75 (m, 1H), 4.64 (d, *J* = 6.2 Hz, 2H), 3.79 (s, 3H), 3.19 (s, 2H), 3.11 (d, *J* = 6.8 Hz, 2H), 0.11 (s, 9H). <sup>13</sup>C NMR (75 MHz, CDCl<sub>3</sub>, DEPT-135) δ 155.70 (C), 136.80 (C), 134.93 (CH), 131.70 (CH), 129.95 (CH), 128.78 (CH), 127.30 (CH), 97.48 (C), 91.96 (C), 88.89 (C), 67.85 (CH<sub>2</sub>), 54.94 (CH<sub>3</sub>), 32.39 (CH<sub>2</sub>), 22.36 (CH<sub>2</sub>), -0.19 (CH<sub>3</sub>). HRMS-ESI: [MNa]<sup>+</sup> Calcd. for C<sub>25</sub>H<sub>30</sub>O<sub>7</sub>NaSi<sub>2</sub>: 557.1094; found: 557.1093.

### General procedure for the synthesis of allylboronates

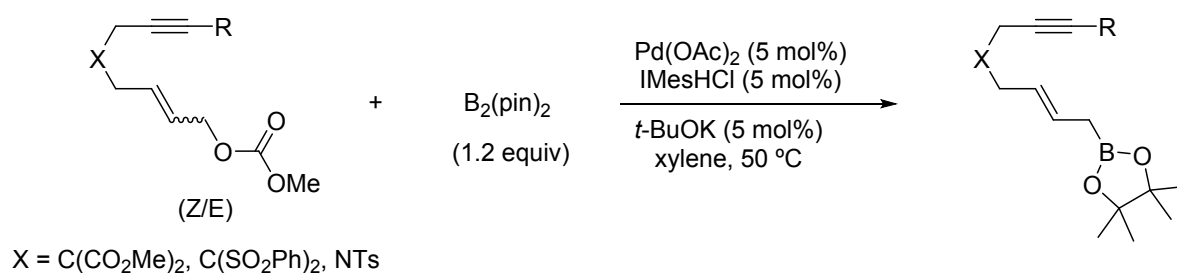

Scheme S2

A solution of allylcarbonate and bis(pinacolato)diboron (1.2 equiv) in 0.6 mL of xylene was added to a previously prepared solution containing the catalytic system. The latter was prepared by addition of a solution of IMesHCl (5 mol%) and *t*-BuOK (5 mol%) in anhydrous xylene (0.5 mL) to a suspension of Pd(OAc)<sub>2</sub> (5 mol%) in anhydrous xylene (0.25 mL) under Ar atmosphere, and heating in a sealed tube at 50 °C for 15 min. After

addition of the reagents on the catalytic solution, the mixture was stirred at 50 °C during the corresponding time indicated below for each compound. After cooling the mixture to room temperature, the solvent was evaporated and the crude was purified by flash chromatography (hexane/Et<sub>2</sub>O or pentane/Et<sub>2</sub>O, it will be specified in each case, molybdophosphoric acid as stain -2.6 mmol/100 mL ethanol-) to give the product.

### Experimental data of allylboronates.

#### (*E*)-dimethyl 2-(but-2-yn-1-yl)-2-(4-(4,4,5,5-tetramethyl-1,3,2-dioxaborolan-2-yl)but-2-en-1-yl)malonate (**2ab**)

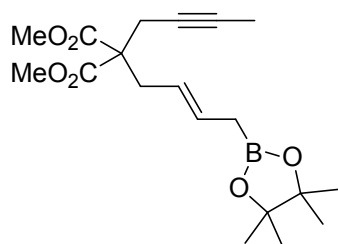

From compound **1a** (300 mg, 0.99 mmol), following the *general alkylation procedure*, after 15 minutes at 50 °C and using xylene (1.5 mL) as solvent. Compound **2ab** was obtained as a colourless oil (196 mg, 54%) by flash chromatography using hexane/Et<sub>2</sub>O 5:1 as eluent.

When the reaction was performed using compound **1b** (100 mg, 0.32 mmol) after 15 minutes at 50 °C and xylene (1.5 mL) as solvent, the product **2ab** was obtained in 71% yield (83 mg).

<sup>1</sup>H NMR (300 MHz, CDCl<sub>3</sub>) δ 5.57 (dt, *J* = 15.0, 7.5 Hz, 1H), 5.16 (dt, *J* = 15.0, 7.5 Hz, 1H), 3.68 (s, 6H), 2.68 (dd, *J* = 5.0, 2.2 Hz, 4H), 1.71 (t, *J* = 2.4 Hz, 3H), 1.61 (d, *J* = 7.4 Hz, 2H), 1.21 (s, 12H). <sup>13</sup>C NMR (75 MHz, CDCl<sub>3</sub>, DEPT-135) δ 170.81 (C), 130.83 (CH), 123.41 (CH), 83.63 (CH), 83.37 (CH), 78.73 (CH), 73.67 (CH), 57.72 (CH), 52.65 (CH<sub>3</sub>), 35.65 (CH<sub>2</sub>), 25.17 (CH<sub>3</sub>), 24.91 (CH<sub>3</sub>), 23.00 (CH<sub>2</sub>), 3.61 (CH<sub>3</sub>). HRMS-ESI: [MNa]<sup>+</sup> Calcd. for C<sub>13</sub>H<sub>18</sub>O<sub>5</sub>Na: 277.1046; found: 277.1053.

#### (*E*)-dimethyl 2-(3-phenylprop-2-yn-1-yl)-2-(4-(4,4,5,5-tetramethyl-1,3,2-dioxaborolan-2-yl)but-2-en-1-yl)malonate (**2cd**)

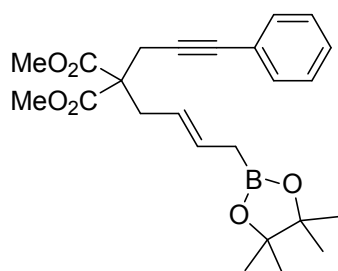

From compound **1c** (50 mg, 0.17 mmol) following the *general alkylation procedure*, after 15 minutes at 50 °C and xylene (1.5 mL) as solvent. Product **2cd** was obtained as a colourless oil (20 mg, 30%) by flash chromatography using hexane/Et<sub>2</sub>O 5:1 as eluent.

When the reaction was performed using compound **1d** (300 mg, 0.80 mmol) after 15 minutes at 50 °C and xylene (1.5 mL) as solvent, compound **2cd** was obtained in 47% yield (164 mg) after column chromatography (hexane/Et<sub>2</sub>O 5:1).

<sup>1</sup>H NMR (300 MHz, CDCl<sub>3</sub>) δ 7.27 (ddd, *J* = 7.2, 5.0, 3.4 Hz, 2H), 7.19 – 7.16 (m, 3H), 5.57 (dt, *J* = 15.0, 7.5 Hz, 1H), 5.16 (dt, *J* = 15.0, 4.4 Hz, 1H), 3.66 (s, 6H), 2.91 (s, 2H), 2.71 (d, *J* = 7.5 Hz, 2H), 1.57 (d, *J* = 7.4 Hz, 2H), 1.14 (s, 12H). <sup>13</sup>C NMR (75 MHz, CDCl<sub>3</sub>, DEPT-135) δ 170.64 (C), 131.82 (CH), 131.21 (CH), 128.30 (CH), 128.01 (CH), 123.52 (C), 123.24 (CH), 84.73 (C), 83.53 (C), 83.39 (C), 57.77 (C), 52.78 (CH<sub>3</sub>), 35.86 (CH<sub>2</sub>), 24.91 (CH<sub>3</sub>), 23.61 (CH<sub>2</sub>). HRMS-ESI: [MNa]<sup>+</sup> Calcd. for C<sub>24</sub>H<sub>31</sub>BO<sub>6</sub>Na:449.2105; found: 449.2091

**(*E*)-*N*-(but-2-yn-1-yl)-4-methyl-*N*-(4-(4,4,5,5-tetramethyl-1,3,2-dioxaborolan-2-yl)but-2-en-1-yl)benzenesulfonamide (**2ef**)**

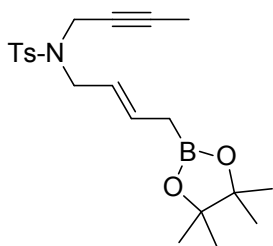

From compound **1e** (50 mg, 0.14 mmol) following the *general alkylation procedure*, after 15 minutes at 50 °C and xylene (1.5 mL) as solvent. Compound **2ef** was obtained as a colourless oil (44.7 mg, 78%) by flash chromatography using hexane/Et<sub>2</sub>O 5:1 as eluent. When the reaction was performed using **1f** (*Z/E* 1:1.4) (100 mg, 0.28 mmol) after 15 minutes at 50 °C and xylene (1.5 mL) as solvent, product **2ef** was obtained in 63% yield (72.3 mg) after column chromatography (hexane/Et<sub>2</sub>O 5:1).

<sup>1</sup>H NMR (300 MHz, CDCl<sub>3</sub>) δ 7.64 (d, *J* = 8.2 Hz, 2H), 7.19 (d, *J* = 8.0 Hz, 2H), 5.64 (dt, *J* = 15.1, 7.5 Hz, 1H), 5.31 – 5.14 (m, 1H), 3.92 (d, *J* = 2.1 Hz, 2H), 3.63 (d, *J* = 6.3 Hz, 2H), 2.33 (s, 3H), 1.59 (d, *J* = 7.3 Hz, 2H), 1.44 (t, *J* = 2.1 Hz, 3H), 1.14 (s, 12H). <sup>13</sup>C NMR (75 MHz, CDCl<sub>3</sub>, DEPT-135) δ 143.14 (C), 136.53 (C), 132.28 (CH), 129.27 (CH), 128.06 (CH), 123.91 (CH), 83.52 (C), 83.30 (C), 81.31 (C), 72.04 (C), 48.62 (CH<sub>2</sub>), 35.92 (CH<sub>2</sub>), 24.90 (CH<sub>3</sub>), 24.70 (CH<sub>3</sub>), 21.62 (CH<sub>3</sub>), 3.36 (CH<sub>3</sub>). (Minimal amount of pinacol was detected by NMR). HRMS-ESI: [MH]<sup>+</sup> Calcd. for C<sub>15</sub>H<sub>19</sub>NO<sub>3</sub>S: 294.1158; found: 294.1175.

**(*E*)-4-methyl-*N*-(4-(4,4,5,5-tetramethyl-1,3,2-dioxaborolan-2-yl)but-2-en-1-yl)-*N*-(3-(trimethylsilyl)prop-2-yn-1-yl)benzenesulfonamide (**2gh**)**



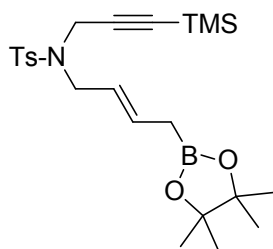

From compound **1g** (50 mg, 0.13 mmol) following the *general alkylation procedure*, after 15 minutes at 50 °C and xylene (1.5 mL) as solvent. Compound **2gh** was obtained as a colourless oil (41 mg, 69%) using hexane/Et<sub>2</sub>O 5:1 as eluent. When the reaction was performed using **1h** (*Z/E* 0.4:1) (100 mg, 0.25 mmol) after 15 minutes at 50 °C and xylene (1.5 mL) as solvent, product **2gh** was obtained in 67% yield (39 mg), after column chromatography (hexane/Et<sub>2</sub>O 5:1).

<sup>1</sup>H NMR (300 MHz, CDCl<sub>3</sub>) δ 7.73 (d, *J* = 8.3 Hz, 2H), 7.29 (dd, *J* = 12.0, 6.5 Hz, 2H), 5.83 – 5.67 (m, 1H), 5.34 (dt, *J* = 7.0, 5.1 Hz, 1H), 4.10 (s, 2H), 3.76 (d, *J* = 7.0 Hz, 2H), 2.42 (s, 3H), 1.70 (d, *J* = 7.4 Hz, 2H), 1.24 (s, 12H), -0.00 (s, 9H). <sup>13</sup>C NMR (75 MHz, CDCl<sub>3</sub>, DEPT-135) δ 143.27 (C), 136.38 (C), 132.62 (CH), 129.54 (CH), 127.97 (CH), 123.65 (CH), 98.34 (C), 90.69 (C), 83.50 (C), 48.56 (CH<sub>2</sub>), 36.43 (CH<sub>2</sub>), 24.90 (CH<sub>3</sub>), 21.63 (CH<sub>3</sub>), -0.23 (CH<sub>3</sub>). (Minimal amount of pinacol was detected by NMR) HRMS-ESI: [MNa]<sup>+</sup> Calcd. for C<sub>23</sub>H<sub>36</sub>BNO<sub>4</sub>SSiNa: 484.1784; found: 484.1785.

**(*E*)-*N*-(3-(4-methoxyphenyl)prop-2-yn-1-yl)-4-methyl-*N*-(4-(4,4,5,5-tetramethyl-1,3,2-dioxaborolan-2-yl)but-2-en-1-yl)benzenesulfonamide (**2i**)**

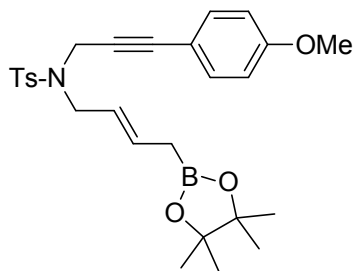

From compound **1i** (100 mg, 0.22 mmol) following the *general alkylation procedure*, after 15 minutes at 50 °C and xylene (1.5 mL) as solvent. Product **2i** was obtained as a colourless oil (80 mg, 72%) by flash chromatography using hexane/Et<sub>2</sub>O 6:1 as eluent.

<sup>1</sup>H NMR (300 MHz, CDCl<sub>3</sub>) δ 7.69 (d, *J* = 8.3 Hz, 2H), 7.26 – 7.12 (m, 2H), 6.94 (d, *J* = 8.7 Hz, 2H), 6.68 (d, *J* = 8.8 Hz, 2H), 5.78 – 5.64 (m, 1H), 5.37 – 5.24 (m, 1H), 4.20 (s, 2H), 3.76 - 3.67 (m, 5H), 2.27 (s, 3H), 1.63 (d, *J* = 7.3 Hz, 2H), 1.16 (s, 12H). <sup>13</sup>C NMR (75 MHz, CDCl<sub>3</sub>, DEPT-135) δ 159.69 (C), 143.31 (C), 136.36 (C), 133.10 (CH), 132.64 (CH), 129.52 (CH), 128.00 (CH), 123.75 (CH), 114.69 (C), 113.82 (CH), 85.48 (C), 83.52 (C), 80.66 (C), 55.42 (CH<sub>3</sub>), 48.85 (CH<sub>2</sub>), 36.40 (CH<sub>2</sub>), 24.90 (CH<sub>3</sub>), 21.57 (CH<sub>3</sub>). HRMS-ESI: [MH]<sup>+</sup> Calcd. for C<sub>27</sub>H<sub>35</sub>BNO<sub>5</sub>S: 496.2323; found: 496.2336.

**(E)-dimethyl 2-(but-2-yn-1-yl)-2-(4-(4,4,5,5-tetramethyl-1,3,2-dioxaborolan-2-yl)but-2-en-1-yl)malonate (2j)**

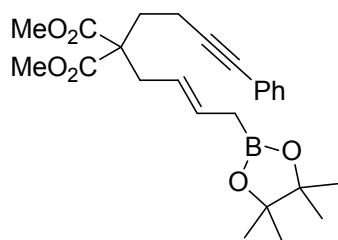

From compound **1j** (100 mg, 0.26 mmol) following the *general alkylation procedure*, after 15 minutes at 50 °C and xylene (1.5 mL) as solvent. Product **2j** was obtained as a colourless oil (42 mg, 37%) by flash chromatography using hexane/Et<sub>2</sub>O 10:1 as eluent.

<sup>1</sup>H NMR (300 MHz, CDCl<sub>3</sub>) δ 7.40 (d, *J* = 3.7 Hz, 2H), 7.31 – 7.26 (m, 3H), 5.76 – 5.55 (m, 1H), 5.31 – 5.17 (m, 1H), 3.74 (s, 6H), 2.75 (d, *J* = 7.3 Hz, 1H), 2.68 (d, *J* = 7.3 Hz, 1H), 2.42 (t, *J* = 7.9 Hz, 2H), 2.31 – 2.20 (m, 2H), 1.73 (d, *J* = 8.1 Hz, 1H), 1.68 (d, *J* = 7.3 Hz, 1H), 1.26 (d, *J* = 3.5 Hz, 12H). <sup>13</sup>C NMR (75 MHz, CDCl<sub>3</sub>, DEPT-135) δ 171.61 (C), 171.51 (CH), 131.65 (CH), 130.75 (CH), 128.29 (CH), 127.74 (CH), 123.90 (C), 123.42 (CH), 122.26 (CH), 89.08 (C), 83.38 (C), 81.00 (C), 57.43 (C), 52.62 (CH<sub>3</sub>), 52.56 (CH<sub>3</sub>), 36.36 (CH<sub>2</sub>), 31.62 (CH<sub>2</sub>), 24.89 (CH<sub>3</sub>), 24.70 (CH<sub>3</sub>), 14.93 (CH<sub>2</sub>). HRMS-ESI: [MNa]<sup>+</sup> Calcd. for C<sub>25</sub>H<sub>33</sub>BO<sub>6</sub>Na: 463.2262; found: 463.2249.

**(E)-dimethyl 2-allyl-2-(4-(4,4,5,5-tetramethyl-1,3,2-dioxaborolan-2-yl)but-2-en-1-yl)malonate (2k)**

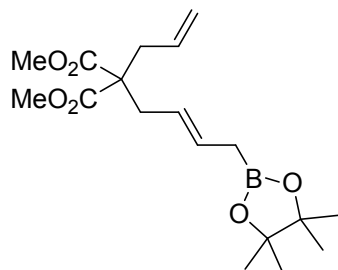

From compound **1k** (150 mg, 0.55 mmol) following the *general alkylation procedure*, after 15 minutes at 50 °C and xylene (1.5 mL) as solvent. Product **2k** was obtained as a colourless oil (135 mg, 70%) by flash chromatography using hexane/Et<sub>2</sub>O 5:1 as eluent

<sup>1</sup>H NMR (300 MHz, CDCl<sub>3</sub>) δ 5.70 – 5.47 (m, 2H), 5.24 – 5.00 (m, 3H), 3.68 (s, 6H), 2.58 (dd, *J* = 11.9, 7.5 Hz, 4H), 1.62 (d, *J* = 7.3 Hz, 2H), 1.22 (s, 12H). <sup>13</sup>C NMR (75 MHz, CDCl<sub>3</sub>, DEPT-135) δ 171.47 (C), 132.67 (CH), 130.61 (CH), 123.55 (CH), 119.07 (CH<sub>2</sub>), 83.34 (C), 58.03 (C), 52.38 (CH<sub>3</sub>), 36.82 (CH<sub>2</sub>), 35.93 (CH<sub>2</sub>), 24.90 (CH<sub>3</sub>). Minimal amount of pinacol was detected by NMR. HRMS-ESI: [MH]<sup>+</sup> Calcd. for C<sub>18</sub>H<sub>30</sub>BO<sub>6</sub>: 353.2129; found: 353.2146.

**(E)-dimethyl 2-(4-(4,4,5,5-tetramethyl-1,3,2-dioxaborolan-2-yl)but-2-en-1-yl)malonate (2l)**

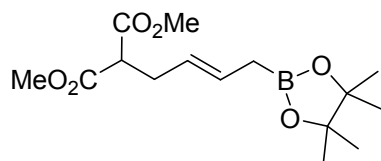

From compound **11** (448 mg, 1.72 mmol) following the *general alkylation procedure*, after 15 minutes at 50 °C and xylene (1.5 mL) as solvent. Product **21** was obtained as a colourless oil (316 mg, 59%) by flash chromatography using hexane/Et<sub>2</sub>O 5:1 as eluent.

<sup>1</sup>H NMR (300 MHz, CDCl<sub>3</sub>) δ 5.55 (dt, *J* = 14.9, 7.3 Hz, 1H), 5.30 (dt, *J* = 15.1, 6.9 Hz, 1H), 3.70 (s, 6H), 3.37 (t, *J* = 7.6 Hz, 1H), 2.55 (t, *J* = 7.2 Hz, 2H), 1.60 (d, *J* = 7.2 Hz, 2H), 1.21 (s, 12H). <sup>13</sup>C NMR (75 MHz, CDCl<sub>3</sub>, DEPT-135) δ 169.55 (C), 128.97 (CH), 125.61 (CH), 83.32 (C), 52.48 (CH), 52.21 (CH<sub>3</sub>), 32.16 (CH<sub>2</sub>), 24.86 (CH<sub>3</sub>). HRMS-ESI: [MH]<sup>+</sup> Calcd. for C<sub>15</sub>H<sub>26</sub>BO<sub>6</sub>: 313.1816; found: 313.1827.

### General procedure for the synthesis of alkenylboronates.

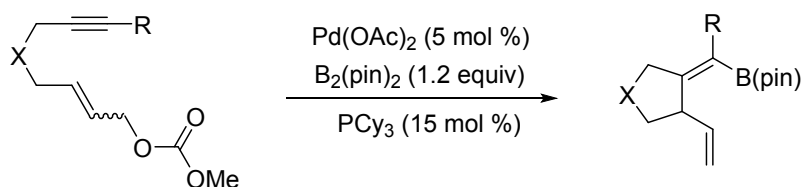

Scheme S3

A carousel tube was charged with the corresponding allylcarbonate (1 equiv) and bis(pinacolato)diboron (1.2 equiv) in anhydrous 1,4-dioxane or xylene (it will be specified in each case). Then, a solution of Pd(OAc)<sub>2</sub> (5 mol%) and P(Cy)<sub>3</sub> (5 mol %) in the corresponding solvent (0.6 mL) was added dropwise under Ar atmosphere. The mixture was stirred during the stated time at the temperature indicated below for every starting compound. After cooling the mixture to room temperature, the solvent was evaporated and the crude was purified by flash chromatography (hexane/Et<sub>2</sub>O or pentane/Et<sub>2</sub>O, as specified in each case, molybdophosphoric acid as stain-2.6 mmol/100 mL ethanol-) to afford the product.

### Experimental data of alkenylboronates.

**(*E*)-dimethyl 3-(1-(4,4,5,5-tetramethyl-1,3,2-dioxaborolan-2-yl)ethylidene)-4-vinylcyclopentane-1,1-dicarboxylate (3ab)**

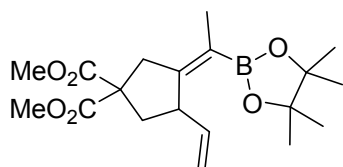

From compound **1a** (68 mg, 0.23 mmol), following the *general alkylation procedure*, after 8 h at 80°C in 1,4-dioxane (1.5 mL) as solvent. Product **3ab** was obtained as a colourless oil (60 mg, 72%) by flash chromatography using hexane/EtOAc 10:1 as eluent.

When the reaction was performed using compound **1b** (100 mg, 0.32 mmol) after 2.5 h at 110°C in 1,4-dioxane (1.5 mL), the product **3ab** was obtained in 71% yield (82.4 mg).

<sup>1</sup>H NMR (300 MHz, CDCl<sub>3</sub>) δ 5.79 – 5.64 (m, 1H), 4.95 – 4.84 (m, 2H), 3.87 (broad s, 1H), 3.71 (s, 3H), 3.68 (s, 3H), 3.29 – 3.11 (m, 1H), 2.84 (d, *J* = 17.9 Hz, 1H), 2.57 (dd, *J* = 13.3, 8.4 Hz, 1H), 2.37 (dd, *J* = 13.4, 2.9 Hz, 1H), 1.72 (s, 3H), 1.21 (d, *J* = 2.5 Hz, 12H). <sup>13</sup>C NMR (75 MHz, CDCl<sub>3</sub>, DEPT-135) δ 172.68 (C), 172.44 (C), 156.33 (C), 141.49 (CH), 113.56 (CH<sub>2</sub>), 83.02 (C), 58.60 (C), 52.92 (CH<sub>3</sub>), 52.76 (CH<sub>3</sub>), 46.32 (CH), 39.70 (CH<sub>2</sub>), 39.25 (CH<sub>2</sub>), 25.07 (CH<sub>3</sub>), 24.94 (CH<sub>3</sub>), 17.64 (CH<sub>3</sub>). HRMS-ESI: [MNa]<sup>+</sup> Calcd. for C<sub>19</sub>H<sub>29</sub>BO<sub>6</sub>Na: 387.1949; found: 387.1966.

**(E)-dimethyl 3-(phenyl(4,4,5,5-tetramethyl-1,3,2-dioxaborolan-2-yl)methylene)-4-vinylcyclopentane-1,1-dicarboxylate (3cd)**

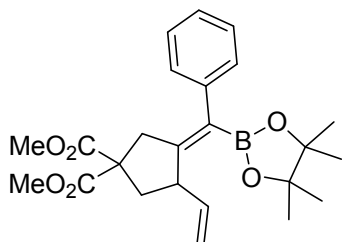

From compound **1c** (150 mg, 0.40 mmol), following the *general alkylation procedure*, after 8 h at 50 °C in xylene (1.5 mL) as solvent. Product **3cd** was obtained as a colourless oil (25 mg, 26%) by flash chromatography using hexane/EtOAc 6:1 as eluent.

When the reaction was performed using compound **1d** (112 mg, 0.30 mmol) under the same conditions, the product **3cd** was obtained in 18% yield (23 mg).

<sup>1</sup>H NMR (300 MHz, CDCl<sub>3</sub>) δ 7.28 (dd, *J* = 11.9, 4.3 Hz, 2H), 7.18 (t, *J* = 7.3 Hz, 1H), 7.14 – 7.08 (m, 2H), 5.96 – 5.77 (m, 1H), 5.17 – 5.04 (m, 1H), 5.00 (dd, *J* = 10.2, 1.4 Hz, 1H), 4.07 – 3.94 (m, 1H), 3.67 (s, 3H), 3.64 (s, 3H), 3.14 (dd, *J* = 17.4, 1.2 Hz, 1H), 2.78 – 2.62 (m, 2H), 2.30 (dd, *J* = 13.4, 4.8 Hz, 1H), 1.21 (d, *J* = 4.5 Hz, 12H). <sup>13</sup>C NMR (75 MHz, CDCl<sub>3</sub>, DEPT-135) δ 172.28 (C), 172.21 (C), 157.33 (C), 142.71 (C), 141.32 (CH), 128.69 (CH), 128.08 (CH), 125.94 (CH), 114.16 (CH<sub>2</sub>), 83.38 (C), 58.73 (C), 52.84 (CH<sub>3</sub>),

52.81 (CH<sub>3</sub>), 46.14 (CH), 40.20 (CH<sub>2</sub>), 39.36 (CH<sub>2</sub>), 25.05 (CH<sub>3</sub>), 24.85 (CH<sub>3</sub>). HRMS-ESI: [MH]<sup>+</sup> Calcd. for C<sub>24</sub>H<sub>32</sub>BO<sub>6</sub>: 427.2286; found: 427.2308.

**(Z)-3-(1-(4,4,5,5-tetramethyl-1,3,2-dioxaborolan-2-yl)ethylidene)-1-tosyl-4-vinylpyrrolidine (3ef)**

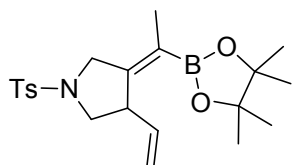

From compound **1e** (50 mg, 0.14 mmol), following the *general alkylation procedure*, after 12 h at 50 °C in xylene (1.5 mL) as solvent. Product **3ef** was obtained as a colourless oil (41 mg, 71%) by flash chromatography using hexane/ Et<sub>2</sub>O 10:1 as eluent.

When the reaction was performed using **1f** (*Z/E* 1:1.4 ) (33 mg, 0.094 mmol) under the same conditions, the product **3ef** was obtained in 61% yield (34.5 mg).

<sup>1</sup>H NMR (300 MHz, CDCl<sub>3</sub>) δ 7.71 (d, *J* = 8.1 Hz, 2H), 7.32 (d, *J* = 8.0 Hz, 2H), 5.79 (ddd, *J* = 17.0, 10.2, 6.7 Hz, 1H), 5.08 (d, *J* = 17.2 Hz, 1H), 4.94 (d, *J* = 10.2 Hz, 1H), 4.01 (d, *J* = 15.4 Hz, 1H), 3.87 (t, *J* = 6.0 Hz, 1H), 3.55 (t, *J* = 12.9 Hz, 2H), 3.03 (dd, *J* = 9.1, 6.3 Hz, 1H), 2.42 (s, 3H), 1.60 (s, 3H), 1.20 (s, 12H). <sup>13</sup>C NMR (75 MHz, CDCl<sub>3</sub>, DEPT-135) δ 152.67 (C), 143.68 (C), 138.91 (CH), 132.61 (C), 129.73 (CH), 128.01 (CH), 114.25 (CH<sub>2</sub>), 83.36 (C), 53.30 (CH<sub>2</sub>), 50.81 (CH<sub>2</sub>), 45.94 (CH), 24.97 (CH<sub>3</sub>), 21.64 (CH<sub>3</sub>), 17.20 (CH<sub>3</sub>). HRMS-ESI: [MH]<sup>+</sup> Calcd. for C<sub>21</sub>H<sub>31</sub>BNO<sub>5</sub>S: 404.2061; found: 404.2076.

**(E)-dimethyl 3-((4-methoxyphenyl)(4,4,5,5-tetramethyl-1,3,2-dioxaborolan-2-yl)methylene)-4-vinylcyclopentane-1,1-dicarboxylate (3mn)**

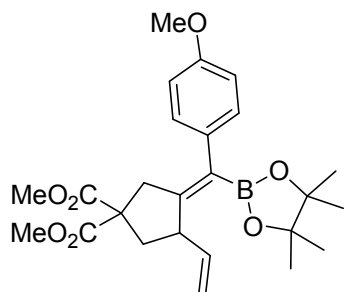

From compound **1m** (100 mg, 0.32 mmol), following the *general alkylation procedure*, after 12 h at 50 °C in 1,4-dioxane (1.5 mL) as solvent. Product **3mn** was obtained as a colourless oil (79 mg, 68%), by flash chromatography using hexane/Et<sub>2</sub>O 10:1 as eluent.

When the reaction was performed using compound **1n** (150 mg, 0.37 mmol) under the same conditions, compound **3mn** was obtained in 37% yield (63 mg).

<sup>1</sup>H NMR (300 MHz, CDCl<sub>3</sub>) δ 7.04 (d, *J* = 8.5 Hz, 2H), 6.83 (d, *J* = 8.5 Hz, 2H), 5.94 – 5.76 (m, 1H), 5.08 (d, *J* = 17.2 Hz, 1H), 4.98 (d, *J* = 10.2 Hz, 1H), 4.05 – 3.93 (m, 1H),

3.79 (s, 3H), 3.67 (s, 3H), 3.63 (s, 3H), 3.16 (d,  $J = 17.5$  Hz, 1H), 2.79 – 2.69 (m, 1H), 2.69 – 2.61 (m, 1H), 2.28 (dd,  $J = 13.4, 4.7$  Hz, 1H), 1.21 (d,  $J = 3.5$  Hz, 12H).  $^{13}\text{C}$  NMR (75 MHz,  $\text{CDCl}_3$ , DEPT-135)  $\delta$  172.31 (C), 172.22 (C), 157.78 (C), 156.80 (C), 141.36 (CH), 134.97 (C), 129.79 (CH), 114.09 ( $\text{CH}_2$ ), 113.48 (CH), 83.33 (C), 58.72 (C), 55.26 ( $\text{CH}_3$ ), 52.82 ( $\text{CH}_3$ ), 46.13 (CH), 40.21 ( $\text{CH}_2$ ), 39.30 ( $\text{CH}_2$ ), 25.05 ( $\text{CH}_3$ ), 24.85 ( $\text{CH}_3$ ). Minimal amount of pinacol was detected by NMR. HRMS-ESI:  $[\text{MNa}]^+$  Calcd. for  $\text{C}_{25}\text{H}_{33}\text{BO}_7\text{Na}$ : 479.2211; found: 479.2224.

**(E)-3-((4,4,5,5-tetramethyl-1,3,2-dioxaborolan-2-yl)methylene)-1-tosyl-4-vinylpyrrolidine (3o)**

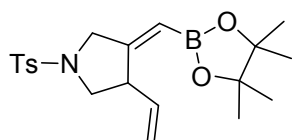

From compound **1o** (100 mg, 0.31 mmol), following the *general alkylation procedure*, after 8 h at 50 °C in xylene (1.5 mL) as solvent. Product **3o** was obtained as a colourless oil (64.2 mg, 53%), by flash chromatography using hexane/ $\text{Et}_2\text{O}$  10:1 as eluent.

$^1\text{H}$  NMR (300 MHz,  $\text{CDCl}_3$ )  $\delta$  7.70 (d,  $J = 8.1$  Hz, 2H), 7.32 (d,  $J = 7.9$  Hz, 2H), 5.77 (ddd,  $J = 17.0, 10.2, 6.8$  Hz, 1H), 5.29 (s, 1H), 5.12 (d,  $J = 17.1$  Hz, 1H), 4.97 (d,  $J = 10.2$  Hz, 1H), 4.08 (d,  $J = 15.2$  Hz, 1H), 3.83 (t,  $J = 5.8$  Hz, 1H), 3.62 (d,  $J = 15.1$  Hz, 1H), 3.52 (d,  $J = 9.4$  Hz, 1H), 3.15 (dd,  $J = 9.3, 6.4$  Hz, 1H), 2.43 (s, 3H), 1.21 (s, 12H).  $^{13}\text{C}$  NMR (75 MHz,  $\text{CDCl}_3$ , DEPT-135)  $\delta$  161.23 (C), 143.77 (C), 137.97 (CH), 132.83 (C), 129.79 (CH), 128.01 (CH), 114.98 ( $\text{CH}_2$ ), 83.37 (C), 53.39 ( $\text{CH}_2$ ), 53.33 ( $\text{CH}_2$ ), 46.27 (CH), 25.02 ( $\text{CH}_3$ ), 24.93 ( $\text{CH}_3$ ), 21.68 ( $\text{CH}_3$ ). Minimal amount of pinacol was detected by NMR. HRMS-ESI:  $[\text{MH}]^+$  Calcd. for  $\text{C}_{20}\text{H}_{29}\text{BNO}_4\text{S}$ : 390.1904; found: 390.1923.

**(E)-2-(1-(4,4-bis(phenylsulfonyl)-2-vinylcyclopentylidene)ethyl)-4,4,5,5-tetramethyl-1,3,2-dioxaborolane (3p)**

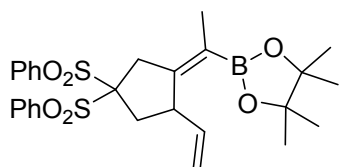

From compound **1p** (50 mg, 0.11 mmol), following the *general alkylation procedure*, after 8 h at 50 °C in xylene (1.5 mL) as solvent. Product **3p** was obtained as a colourless oil (36 mg, 65%) using hexane/EtOAc 6:1 as eluent.

Using Pd(OAc)<sub>2</sub> (15 mol%) and 1,4-dioxane (1.2 mL), compound **3p** was obtained as a colourless oil (57 mg, 73%).

<sup>1</sup>H NMR (300 MHz, CDCl<sub>3</sub>) δ 8.08 (t, *J* = 12.0 Hz, 2H), 7.91 (d, *J* = 7.5 Hz, 2H), 7.72 (t, *J* = 7.4 Hz, 1H), 7.61 (q, *J* = 7.1 Hz, 3H), 7.50 (t, *J* = 7.6 Hz, 2H), 5.76 (ddd, *J* = 17.3, 10.1, 7.5 Hz, 1H), 4.98 (d, *J* = 17.0 Hz, 1H), 4.88 (d, *J* = 10.1 Hz, 1H), 3.82 – 3.69 (m, 1H), 3.36 (d, *J* = 18.3 Hz, 1H), 3.14 (d, *J* = 18.2 Hz, 1H), 2.95 (dd, *J* = 16.0, 9.4 Hz, 1H), 2.69 (dd, *J* = 16.0, 5.5 Hz, 1H), 1.54 (s, 3H), 1.18 (d, *J* = 2.0 Hz, 12H). <sup>13</sup>C NMR (75 MHz, CDCl<sub>3</sub>, DEPT-135) δ 154.15 (C), 141.37 (CH), 137.65 (C), 136.64 (C), 134.65 (CH), 131.31 (CH), 131.02 (CH), 128.94 (CH), 128.87 (CH), 113.71 (CH<sub>2</sub>), 92.85 (C), 83.18 (C), 46.25 (CH), 36.65 (CH<sub>2</sub>), 36.56 (CH<sub>2</sub>), 25.19 (CH<sub>3</sub>), 24.91 (CH<sub>3</sub>), 18.38 (CH<sub>3</sub>). HRMS-ESI: [MH]<sup>+</sup> Calcd. for C<sub>27</sub>H<sub>34</sub>BO<sub>6</sub>S<sub>2</sub>: 529.1184; found: 529.1882.

**(E)-((4,4-bis(phenylsulfonyl)-2-vinylcyclopentylidene)(4,4,5,5-tetramethyl-1,3,2-dioxaborolan-2-yl)methyl)trimethylsilane (3q)**

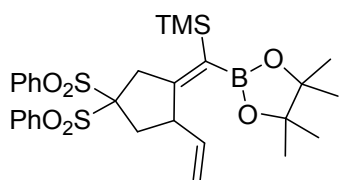

From compound **1q** (100 mg, 0.19 mmol), following the *general alkylation procedure*, after 40 min at 130 °C in xylene (2 mL) as solvent. Product **3q** was obtained, with some traces of an unidentified compound, as a colourless oil (61 mg, 56%)

by flash chromatography using pentane/Et<sub>2</sub>OAc 10:1 as eluent.

<sup>1</sup>H NMR (300 MHz, CDCl<sub>3</sub>) δ 8.08 – 8.00 (m, 4H), 7.74 – 7.66 (m, 2H), 7.63 – 7.54 (m, 4H), 5.78 (ddd, *J* = 17.3, 10.1, 7.4 Hz, 1H), 5.09 – 4.99 (m, 2H), 3.62 (q, *J* = 7.8 Hz, 1H), 3.46 (dd, *J* = 18.5, 2.1 Hz, 1H), 3.27 (d, *J* = 18.5 Hz, 1H), 2.77 (dd, *J* = 15.4, 9.1 Hz, 1H), 2.53 (dd, *J* = 15.5, 7.9 Hz, 1H), 1.22 (d, *J* = 1.4 Hz, 12H), 0.15 (s, 9H). <sup>13</sup>C NMR (75 MHz, CDCl<sub>3</sub>, DEPT-135) δ 163.14 (C), 140.35 (CH), 137.13 (C), 136.43 (C), 134.72 (CH), 134.68 (CH), 131.37 (CH), 131.33 (CH), 128.98 (CH), 128.82 (CH), 116.49 (CH<sub>2</sub>), 92.79 (C), 83.23 (C), 49.82 (CH), 40.10 (CH<sub>2</sub>), 36.91 (CH<sub>2</sub>), 25.88 (CH<sub>3</sub>), 25.40 (CH<sub>3</sub>), 0.83 (CH<sub>3</sub>). HRMS-ESI: [MNa]<sup>+</sup> Calcd. for C<sub>23</sub>H<sub>29</sub>BO<sub>6</sub>S<sub>2</sub>SiNa: 527.1166; found: 527.1481.

## Oxidation of alkenylboronate **3ef** to **4**

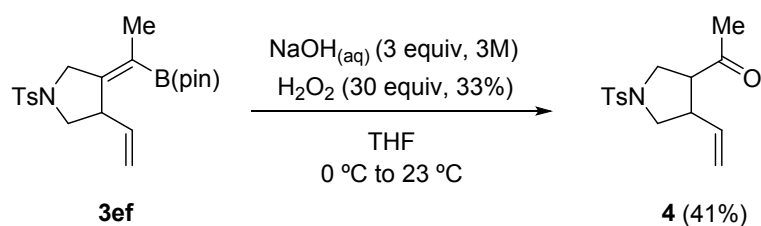

Scheme S4

To a solution of alkenylboronate **3ef** (34 mg, 0.084 mmol, 1 equiv) in THF (2 mL), an aqueous solution of NaOH (3M, 0.42 mmol, 3 equiv) was slowly added at room temperature. Then, the mixture was cooled to 0 °C and a solution of H<sub>2</sub>O<sub>2</sub> (33% w/v, 4.37 mmol, 30 equiv) was added dropwise. After addition, the reaction was stirred at room temperature for 8 h. Then, water and Et<sub>2</sub>O were added into the resulting mixture. The aqueous layer was separated and extracted with Et<sub>2</sub>O (3 x 10 mL). The combined organic phases were dried over anhydrous Mg<sub>2</sub>SO<sub>4</sub> and filtered through anhydrous Na<sub>2</sub>SO<sub>4</sub>. The solvent was removed under vacuum and the crude was purified by flash chromatography (hexane/EtOAc 8:1) to afford the title compound as a yellowish oil (10 mg, 41%).

<sup>1</sup>H NMR (300 MHz, CDCl<sub>3</sub>) δ 7.71 (d, *J* = 8.2 Hz, 2H), 7.34 (d, *J* = 8.1 Hz, 2H), 5.73 – 5.57 (m, 1H), 5.09 (dd, *J* = 13.8, 3.0 Hz, 2H), 3.56 (dd, *J* = 10.0, 7.9 Hz, 1H), 3.41 (ddd, *J* = 27.1, 10.1, 8.0 Hz, 2H), 3.09 (dd, *J* = 9.9, 8.1 Hz, 1H), 2.96 – 2.74 (m, 2H), 2.45 (s, 3H), 2.11 (s, 3H). <sup>13</sup>C NMR (75 MHz, CDCl<sub>3</sub>, DEPT-135) δ 205.64 (C), 143.80 (C), 136.27 (CH), 133.38 (C), 129.79 (CH), 127.66 (CH), 117.88 (CH<sub>2</sub>), 56.03 (CH), 52.55 (CH<sub>2</sub>), 49.24 (CH<sub>2</sub>), 45.83 (CH), 30.06 (CH<sub>3</sub>), 21.56 (CH<sub>3</sub>). HRMS-ESI: [MH]<sup>+</sup> Calcd. for C<sub>15</sub>H<sub>20</sub>NO<sub>3</sub>S: 294.1158; found: 294.1157.

## Suzuki cross-coupling reactions of alkenylboronates and experimental data



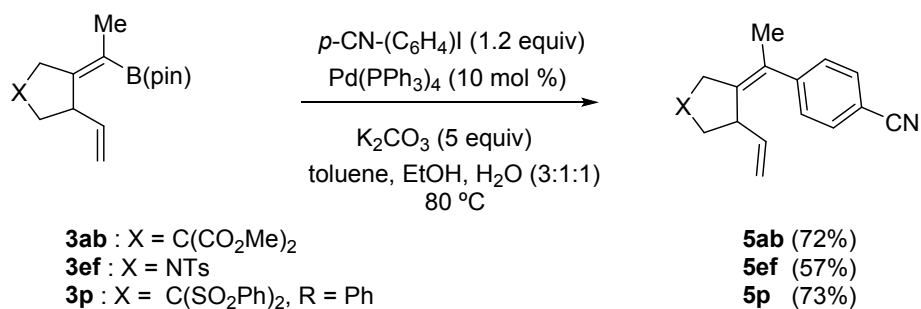

Scheme S5

**(Z)-dimethyl 3-(1-(4-cyanophenyl)ethylidene)-4-vinylcyclopentane-1,1-dicarboxylate (5ab)**

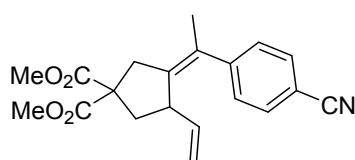

A solution of 4-iodobenzonitrile (23.9 mg, 0.10 mmol) in toluene (0.5 mL), EtOH (0.15 mL) and H<sub>2</sub>O (0.15 mL) was added to a dry tube containing alkenylboronate **3ab** (10 mg, 0.042 mmol), K<sub>2</sub>CO<sub>3</sub> (60.3 mg, 0.44 mmol) and Pd(PPh<sub>3</sub>)<sub>4</sub> (30.16 mg, 0.026 mmol), under Ar atmosphere. The mixture was heated at 80 °C for 4 h in the sealed tube. After cooling to room temperature, the solvent was removed under vacuum and the crude was purified by flash chromatography (hexane/Et<sub>2</sub>O 8:1). The product **5ab** was obtained as a yellowish oil (20.78 mg, 72%).<sup>12</sup>

<sup>1</sup>H NMR (300 MHz, CDCl<sub>3</sub>) δ 7.54 (d, *J* = 8.1 Hz, 2H), 7.22 (d, *J* = 8.1 Hz, 2H), 5.30 (ddd, *J* = 17.3, 10.2, 7.4 Hz, 1H), 4.62 (d, *J* = 10.1 Hz, 1H), 4.53 (d, *J* = 17.1 Hz, 1H), 3.77 (s, 3H), 3.73 (s, 3H), 3.40 – 3.28 (m, 1H), 3.20 – 3.02 (m, 2H), 2.53 (dd, *J* = 13.3, 8.0 Hz, 1H), 2.12 (dd, *J* = 13.3, 6.6 Hz, 1H), 2.00 (s, 3H). <sup>13</sup>C NMR (75 MHz, CDCl<sub>3</sub>, DEPT-135) δ 172.35 (C), 172.07 (C), 148.52 (C), 139.26 (CH), 138.74 (C), 131.94 (CH), 130.18 (C), 128.96 (CH), 119.22 (C), 114.90 (CH<sub>2</sub>), 110.20 (C), 58.75 (C), 53.09 (CH<sub>3</sub>), 52.96 (CH<sub>3</sub>), 45.86 (CH), 40.96 (CH<sub>2</sub>), 39.39 (CH<sub>2</sub>), 21.93 (CH<sub>3</sub>). HRMS-ESI: [MNa]<sup>+</sup> Calcd. for C<sub>20</sub>H<sub>21</sub>NO<sub>4</sub>Na: 362.1362; found: 362.1367.

**(E)-4-(1-(1-tosyl-4-vinylpyrrolidin-3-ylidene)ethyl)benzonitrile (5ef)**

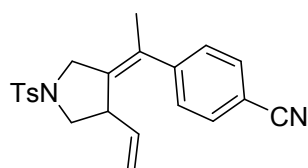

A solution of 4-iodobenzonitrile (18.14 mg, 0.079 mmol) in toluene (0.5 mL), EtOH (0.15 mL) and H<sub>2</sub>O (0.15 mL) was added to a dry tube containing the alkenylboronate **3hi** (25 mg,

0.062 mmol), K<sub>2</sub>CO<sub>3</sub> (50 mg, 0.37 mmol) and Pd(PPh<sub>3</sub>)<sub>4</sub> (8.3 mg, 0.007 mmol), under Ar atmosphere, and the mixture was heated at 80 °C for 4 h in the sealed tube. After cooling to room temperature, the solvent was removed under vacuum and the crude was purified by flash chromatography (hexane/Et<sub>2</sub>O 10:1). The product **5ef** was obtained as yellowish oil (13 mg, 57%).<sup>12</sup>

<sup>1</sup>H NMR (300 MHz, CDCl<sub>3</sub>) δ 7.66 (t, *J* = 7.1 Hz, 2H), 7.49 (d, *J* = 8.3 Hz, 2H), 7.29 (d, *J* = 8.0 Hz, 2H), 7.12 (d, *J* = 8.3 Hz, 2H), 5.39 (ddd, *J* = 17.1, 10.2, 7.1 Hz, 1H), 4.70 (d, *J* = 10.3 Hz, 1H), 4.53 (d, *J* = 17.1 Hz, 1H), 3.98 – 3.73 (m, 2H), 3.15 (s, 3H), 2.41 – 2.34 (m, 3H), 1.85 (s, 3H). <sup>13</sup>C NMR (75 MHz, CDCl<sub>3</sub>, DEPT-135) δ 147.17 (C), 143.94 (C), 137.21 (CH), 135.32 (C), 133.03 (CH), 132.97 (C), 132.13 (CH), 130.41 (C), 129.88 (CH), 128.59 (CH), 128.08 (C), 115.91 (CH<sub>2</sub>), 110.84 (C), 54.08 (CH<sub>2</sub>), 50.88 (CH<sub>2</sub>), 45.59 (CH), 21.72 (CH<sub>3</sub>), 21.53 (CH<sub>3</sub>). HRMS-ESI: [MH]<sup>+</sup> Calcd. for C<sub>22</sub>H<sub>23</sub>N<sub>2</sub>O<sub>2</sub>S: 379.1474; found: 379.1480.

#### (*Z*)-4-(1-(4,4-bis(phenylsulfonyl)-2-vinylcyclopentylidene)ethyl)benzonitrile (**5p**)

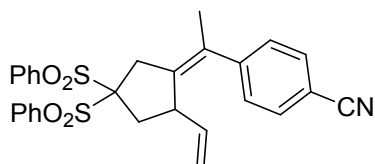

A solution of 4-iodobenzonitrile (24.45 mg, 0.11 mmol) in toluene (0.5 mL), EtOH (0.15 mL) and H<sub>2</sub>O (0.15 mL) was added to a dry tube containing the alkenylboronate **3p** (47 mg, 0.089 mmol), K<sub>2</sub>CO<sub>3</sub> (61.48 mg, 0.44 mmol) and Pd(PPh<sub>3</sub>)<sub>4</sub> (10.2 mg, 0.009 mmol) under Ar atmosphere, and the mixture was heated at 80 °C for 4 h in the sealed tube. After cooling to room temperature, the solvent was removed under vacuum and the crude was purified by flash chromatography (hexane/Et<sub>2</sub>O 3:1). The product **5p** was obtained as a yellowish oil (33 mg, 73%).<sup>12</sup>

<sup>1</sup>H NMR (300 MHz, CDCl<sub>3</sub>) δ 8.11 – 8.03 (m, 4H), 7.80 – 7.70 (m, 2H), 7.67 – 7.53 (m, 6H), 7.18 (d, *J* = 8.2 Hz, 2H), 5.27 (dt, *J* = 17.1, 8.8 Hz, 1H), 4.53 (d, *J* = 10.0 Hz, 1H), 4.32 (d, *J* = 16.9 Hz, 1H), 3.69 – 3.50 (m, 2H), 3.12 (d, *J* = 18.0 Hz, 1H), 2.81 – 2.67 (m, 1H), 2.51 (dd, *J* = 15.2, 7.8 Hz, 1H), 1.92 (s, 3H). <sup>13</sup>C NMR (75 MHz, CDCl<sub>3</sub>, DEPT-135) δ 147.69 (C), 138.43 (CH), 137.15 (C), 136.89 (C), 136.06 (C), 134.99 (CH), 134.83 (CH), 132.15 (CH), 131.25 (CH), 131.22 (CH), 131.07 (CH), 129.04 (CH), 128.99 (CH), 128.94 (C), 119.07 (CH<sub>2</sub>), 115.27 (C), 110.62 (C), 92.38 (CH), 46.37 (C), 37.96 (CH<sub>2</sub>),

36.58 (CH<sub>2</sub>), 22.45 (CH<sub>3</sub>). HRMS-ESI: [MH]<sup>+</sup> Calcd. for C<sub>28</sub>H<sub>26</sub>NO<sub>4</sub>S<sub>2</sub>: 504.1297; found: 504.1281.

**Synthesis of (Z)-dimethyl 3-(1-(4-cyanophenyl)ethylidene)-4-vinylcyclopentane-1,1-dicarboxylate (**5ab**) from allylcarbonate **1a****

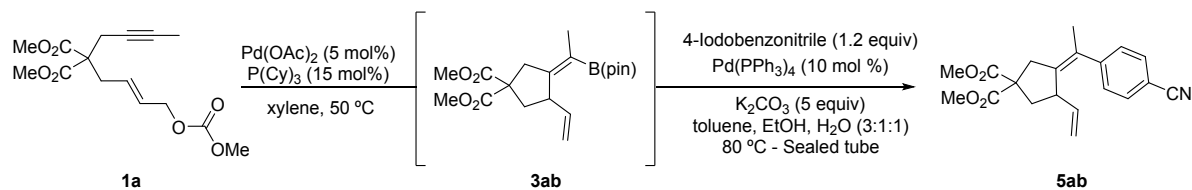

Scheme S6

A dry carousel tube was charged with allylcarbonate **1a** (100 mg, 3.12 mmol, 1 equiv), bis(pinacolato)diboron (97.5mg, 0.38 mmol, 1.2 equiv), and anhydrous xylene (0.75 mL) under Ar atmosphere. Then, a solution of Pd(OAc)<sub>2</sub> (3.59 mg, 0.016 mmol, 5 mol%) and P(Cy)<sub>3</sub> (13.48 mg, 0.048 mmol, 5 mol %) in xylene (0.75 mL) was added dropwise under Ar. The mixture was heated at 50 °C for 8 h. After cooling to room temperature, the solvent was removed under vacuum and the resulting compound **3ab** was used without further purification.

Then, a mixture of crude alkenylboronate **3ab**, K<sub>2</sub>CO<sub>3</sub> (219.89 mg, 1.59 mmol, 5 equiv) and Pd(PPh<sub>3</sub>)<sub>4</sub> (3.6 mg, 0.0031 mmol, 10 mol%), was treated with a solution of 4-iodobenzonitrile (87.60 mg, 0.38 mmol, 1.2 equiv) in toluene (0.5 mL), EtOH (0.15 mL) and H<sub>2</sub>O (0.15 mL) under Ar atmosphere, and the mixture was heated at 80 °C for 8 h in a sealed tube. After cooling to room temperature the solvent was removed under vacuum and the crude was purified by flash chromatography (hexane/Et<sub>2</sub>O 5:1). Compound **5ab** was obtained as a yellowish oil (67.5 mg, 63%).

<sup>1</sup>H NMR (300 MHz, CDCl<sub>3</sub>) δ 7.54 (d, *J* = 8.1 Hz, 2H), 7.22 (d, *J* = 8.1 Hz, 2H), 5.30 (ddd, *J* = 17.3, 10.2, 7.4 Hz, 1H), 4.62 (d, *J* = 10.1 Hz, 1H), 4.53 (d, *J* = 17.1 Hz, 1H), 3.77 (s, 3H), 3.73 (s, 3H), 3.40 – 3.28 (m, 1H), 3.20 – 3.02 (m, 2H), 2.53 (dd, *J* = 13.3, 8.0 Hz, 1H), 2.12 (dd, *J* = 13.3, 6.6 Hz, 1H), 2.00 (s, 3H). <sup>13</sup>C NMR (75 MHz, CDCl<sub>3</sub>, DEPT-135) δ 172.35 (C), 172.07 (C), 148.52 (C), 139.26 (CH), 138.74 (C), 131.94 (CH), 130.18

(C), 128.96 (CH), 119.22 (C), 114.90 (CH<sub>2</sub>), 110.20 (C), 58.75 (C), 53.09 (CH<sub>3</sub>), 52.96 (CH<sub>3</sub>), 45.86 (CH), 40.96 (CH<sub>2</sub>), 39.39 (CH<sub>2</sub>), 21.93 (CH<sub>3</sub>). HRMS-ESI: [MNa]<sup>+</sup> Calcd. for C<sub>20</sub>H<sub>21</sub>NO<sub>4</sub>Na: 362.1362; found: 362.1367

### Suzuki cross-coupling of allylboronates

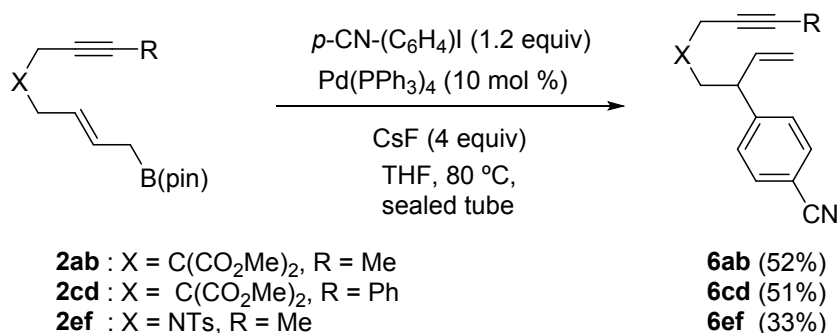

Scheme S7

### Dimethyl 2-(but-2-yn-1-yl)-2-(2-(4-cyanophenyl)but-3-en-1-yl)malonate (**6ab**)

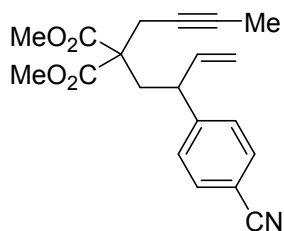

A solution of 4-iodobenzonitrile (20.74 mg, 0.09 mmol) in dry THF (4 mL) was added to a dry tube containing the allylboronate **2ab** (48 mg, 0.14 mmol), CsF (83.41 mg, 0.55 mmol) and Pd(PPh<sub>3</sub>)<sub>4</sub> (23.79 mg, 0.021 mmol, 15 mol%) under Ar atmosphere; and the mixture was heated at 80 °C for 3 h in the sealed tube. After cooling to room temperature the solvent was removed under vacuum and the crude was purified by flash chromatography (hexane/Et<sub>2</sub>O 4:1). The product was obtained as a yellowish oil (23 mg, 52%).<sup>13</sup>

<sup>1</sup>H NMR (300 MHz, CDCl<sub>3</sub>) δ 7.61 – 7.56 (m, 2H), 7.34 – 7.30 (m, 2H), 5.85 (ddd, *J* = 17.2, 10.2, 8.0 Hz, 1H), 5.08 – 4.96 (m, 2H), 3.74 – 3.68 (m, 1H), 3.65 (s, 3H), 3.50 (s, 3H), 2.94 – 2.71 (m, 2H), 2.63 – 2.45 (m, 2H), 1.74 (t, *J* = 2.5 Hz, 3H). <sup>13</sup>C NMR (75 MHz, CDCl<sub>3</sub>, DEPT-135) δ 170.60 (C), 170.46 (C), 149.38 (C), 140.30 (CH), 132.40 (CH), 128.79 (CH), 118.98 (C), 116.01 (CH<sub>2</sub>), 110.52 (C), 79.65 (C), 73.09 (C), 56.33 (C), 52.75 (CH<sub>3</sub>), 52.69 (CH<sub>3</sub>), 45.79 (CH), 37.09 (CH<sub>2</sub>), 23.62 (CH<sub>2</sub>), 3.61 (CH<sub>3</sub>). HRMS-ESI: [MH]<sup>+</sup> Calcd. for C<sub>20</sub>H<sub>22</sub>NO<sub>4</sub>: 340.1543; found: 340.1533.

**Dimethyl 2-(2-(4-cyanophenyl)but-3-en-1-yl)-2-(3-phenylprop-2-yn-1-yl)malonate (6cd)**

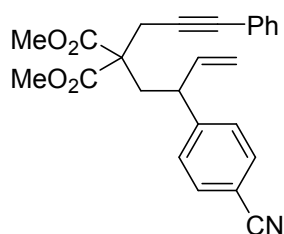

A solution of 4-iodobenzonitrile (55.73 mg, 0.24 mmol) in THF (1.5 mL) was added to a dry tube containing the allylboronate **2cd** (138 mg, 0.32 mmol), CsF (224 mg, 0.98 mmol) and Pd(PPh<sub>3</sub>)<sub>4</sub> (64 mg, 0.055 mmol, 15 mol%), under Ar atmosphere; and the mixture was heated at 80 °C for 3 h in a sealed tube. After cooling to room temperature the solvent was removed under vacuum and the crude was purified by flash chromatography (hexane/Et<sub>2</sub>O 5:1). The product **6cd** was obtained as a yellowish oil (76 mg, 51%).<sup>13</sup>

<sup>1</sup>H NMR (300 MHz, CDCl<sub>3</sub>) δ 7.60 – 7.55 (m, 2H), 7.36 – 7.27 (m, 7H), 5.89 (ddd, *J* = 16.9, 10.2, 7.9 Hz, 1H), 5.07 (dt, *J* = 5.1, 1.0 Hz, 1H), 5.03 (dt, *J* = 11.8, 1.0 Hz, 1H), 3.70 (s, 3H), 3.54 (s, 3H), 3.48 (dd, *J* = 13.3, 6.2 Hz, 1H), 3.22 – 2.98 (m, 2H), 2.72 – 2.55 (m, 2H).<sup>13</sup>C NMR (75 MHz, CDCl<sub>3</sub>, DEPT-135) δ 170.38 (C), 170.26 (C), 149.23 (C), 140.19 (CH), 132.44 (CH), 131.70 (CH), 128.77 (CH), 128.41 (CH), 128.33 (CH), 123.02 (C), 118.92 (C), 116.14 (CH<sub>2</sub>), 110.58 (C), 84.31 (C), 83.87 (C), 56.44 (C), 52.87 (CH<sub>3</sub>), 52.81 (CH<sub>3</sub>), 45.87 (CH), 37.23 (CH<sub>2</sub>), 24.15 (CH<sub>2</sub>). HRMS-ESI: [MH]<sup>+</sup> Calcd. for C<sub>25</sub>H<sub>24</sub>NO<sub>4</sub>:402.1699; found: 402.1712.

***N*-(but-2-yn-1-yl)-*N*-(2-(4-cyanophenyl)but-3-en-1-yl)-4-methylbenzenesulfonamide (6ef)**

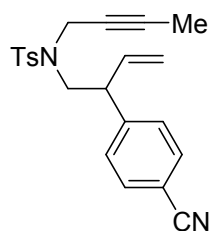

A solution of 4-iodobenzonitrile (14 mg, 0.06 mmol) in THF (1.5 mL) was added to a dry tube containing the allylboronate **2ef** (80 mg, 0.20 mmol), CsF (138.4 mg, 0.91 mmol) and Pd(PPh<sub>3</sub>)<sub>4</sub> (39.4 mg, 0.034 mmol, 15 mol%) under Ar atmosphere; and the mixture was heated at 80 °C for 8 h in the sealed tube. After cooling to room temperature the solvent was removed under vacuum and the crude was purified by flash chromatography (hexane/Et<sub>2</sub>O 4:1). The product **6ef** was obtained as a yellowish oil (24.75 mg, 33%).<sup>13</sup>

$^1\text{H}$  NMR (300 MHz,  $\text{CDCl}_3$ )  $\delta$  7.61 (d,  $J = 8.3$  Hz, 2H), 7.54 (d,  $J = 8.2$  Hz, 2H), 7.29 (d,  $J = 8.2$  Hz, 2H), 7.21 (d,  $J = 5.4$  Hz, 2H), 5.90 (ddd,  $J = 17.6, 10.3, 7.6$  Hz, 1H), 5.19 – 5.01 (m, 2H), 3.99 3.93 (m, 1H), 3.76 – 3.64 (m, 2H), 3.44 – 3.27 (m, 2H), 2.35 (s, 3H), 1.48 (t,  $J = 2.3$  Hz, 3H).  $^{13}\text{C}$  NMR (75 MHz,  $\text{CDCl}_3$ , DEPT-135)  $\delta$  146.54 (C), 143.46 (CH), 137.25 (C), 135.73 (C), 132.45 (CH), 129.32 (CH), 128.89 (CH), 127.83 (CH), 118.75 (C), 117.86 ( $\text{CH}_2$ ), 110.92 (C), 82.01 (C), 71.40 (C), 50.45 ( $\text{CH}_2$ ), 48.53 (CH), 37.70 ( $\text{CH}_2$ ), 21.51 ( $\text{CH}_3$ ), 3.24 ( $\text{CH}_3$ ). HRMS-ESI:  $[\text{MH}]^+$  Calcd. for  $\text{C}_{22}\text{H}_{23}\text{N}_2\text{O}_2\text{S}$ : 379.1474; found: 379.1465.

### Synthesis of allylboronate 7

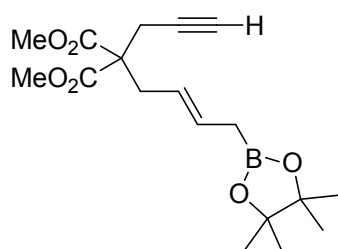

To a suspension of NaH (60% in mineral oil, 15 mg, 0.36 mmol) in anhydrous THF (10 mL) under Ar atmosphere at 0 °C, was slowly added **21** (102 mg, 0.33 mmol) and the mixture was stirred at room temperature for 30 minutes (formation of  $\text{H}_2$  bubbles were observed during the addition). Then, propargyl bromide solution (80 wt. % in toluene, 42.4 mg, 0.36 mmol), was added dropwise and the mixture was allowed to react at room temperature for 12 h. Monitoring by TLC indicated the completion of the reaction. Then water and  $\text{Et}_2\text{O}$  were added into the resulting mixture. The aqueous layer was separated and extracted successively with  $\text{Et}_2\text{O}$  (3 x 25 mL). The combined organic phases were washed several times with water, twice with saturated aqueous solution of NaCl, and dried over anhydrous  $\text{MgSO}_4$ . The solvent was removed under vacuum and the crude was purified by flash chromatography (hexane/ $\text{Et}_2\text{O}$  15:1, to afford the title compound as a colourless oil (80 mg, 70%).

$^1\text{H}$  NMR (300 MHz,  $\text{CDCl}_3$ )  $\delta$  5.67 – 5.51 (m, 1H), 5.21 – 5.06 (m, 1H), 3.69 (s, 6H), 2.74 (d,  $J = 2.7$  Hz, 2H), 2.70 (d,  $J = 7.5$  Hz, 2H), 1.96 (t,  $J = 2.7$  Hz, 1H), 1.60 (d,  $J = 7.3$  Hz, 2H), 1.20 (s, 12H).  $^{13}\text{C}$  NMR (75 MHz,  $\text{CDCl}_3$ , DEPT-135)  $\delta$  170.37 (C), 131.26 (CH), 122.96 (CH), 83.32 (C), 79.14 (C), 71.29 (CH), 57.28 (C), 52.71 ( $\text{CH}_3$ ), 35.52 ( $\text{CH}_2$ ), 24.84 ( $\text{CH}_3$ ), 22.56 ( $\text{CH}_2$ ). HRMS-ESI:  $[\text{MH}]^+$  Calcd. for  $\text{C}_{18}\text{H}_{28}\text{BO}_6$ : 351.1973; found: 351.1986

### Cycloisomerization of allylboronate 7.

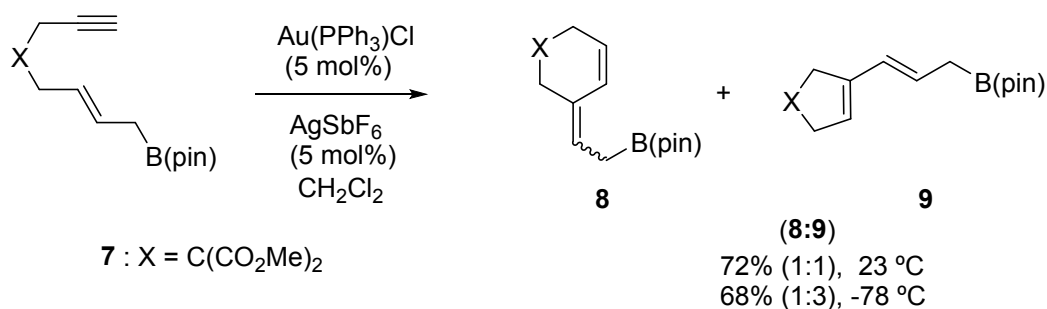

Scheme S8

A solution of allylboronate **7** (100 mg, 0.28 mmol) in  $\text{CH}_2\text{Cl}_2$  (0.5 mL) was added to a mixture of  $\text{AuPPh}_3\text{Cl}$  (3.0 mol%) and  $\text{AgSbF}_6$  (3.0 mol%) in  $\text{CH}_2\text{Cl}_2$  (1 mL). The mixture was stirred at room temperature for 5 minutes, before being filtered through a silica gel plug which was rinsed with diethyl ether. The resulting solution was then evaporated in vacuo to afford the crude product. The ratio of the two isomers observed (by GC-MS) was determined by  $^1\text{H-NMR}$ . The residue was purified by flash chromatography (hexane  $\rightarrow$  hexane/EtOAc (5:1) to give a mixture of products that could not be separated (**8:9** = 1:1) (72 mg, 72%).<sup>14</sup>

$^1\text{H NMR}$  (300 MHz,  $\text{CDCl}_3$ )  $\delta$  6.36 (d,  $J = 10.1$  Hz, 1H), 6.12 (d,  $J = 15.7$  Hz, 2H), 5.93 – 5.30 (m, 8H), 3.70 (s, 12H), 3.66 (s, 6H), 3.06 (d,  $J = 18.2$  Hz, 8H), 2.71 (d,  $J = 36.8$  Hz, 4H), 1.88 (d,  $J = 8.5$  Hz, 1H), 1.74 – 1.67 (m, 5H), 1.22 (s, 24H), 1.19 (s, 12H).

$^{13}\text{C NMR}$  (75 MHz,  $\text{CDCl}_3$ , DEPT-135)  $\delta$  172.72 (C), 172.63 (C), 171.62 (C), 139.86 (C), 128.91 (C), 127.81 (CH), 127.34 (CH), 126.56 (CH), 126.19 (CH), 125.06 (CH), 124.10 (CH), 124.03 (CH), 123.68 (CH), 123.09 (CH), 83.46 (C), 83.42 (C), 83.33 (C), 59.43 (C), 58.83 (C), 54.29 (C), 52.88 ( $\text{CH}_3$ ), 52.67 ( $\text{CH}_3$ ), 43.25 ( $\text{CH}_2$ ), 40.80 ( $\text{CH}_2$ ), 40.42 ( $\text{CH}_2$ ), 39.98 ( $\text{CH}_2$ ), 37.39 ( $\text{CH}_2$ ), 31.88 ( $\text{CH}_2$ ), 24.85 ( $\text{CH}_3$ ), 24.82 ( $\text{CH}_3$ ).

# $^1\text{H-NMR}$ and $^{13}\text{C-NMR}$ spectra

$^1\text{H-NMR}$  and  $^{13}\text{C-NMR}$  spectra of dienynes precursors.

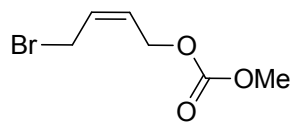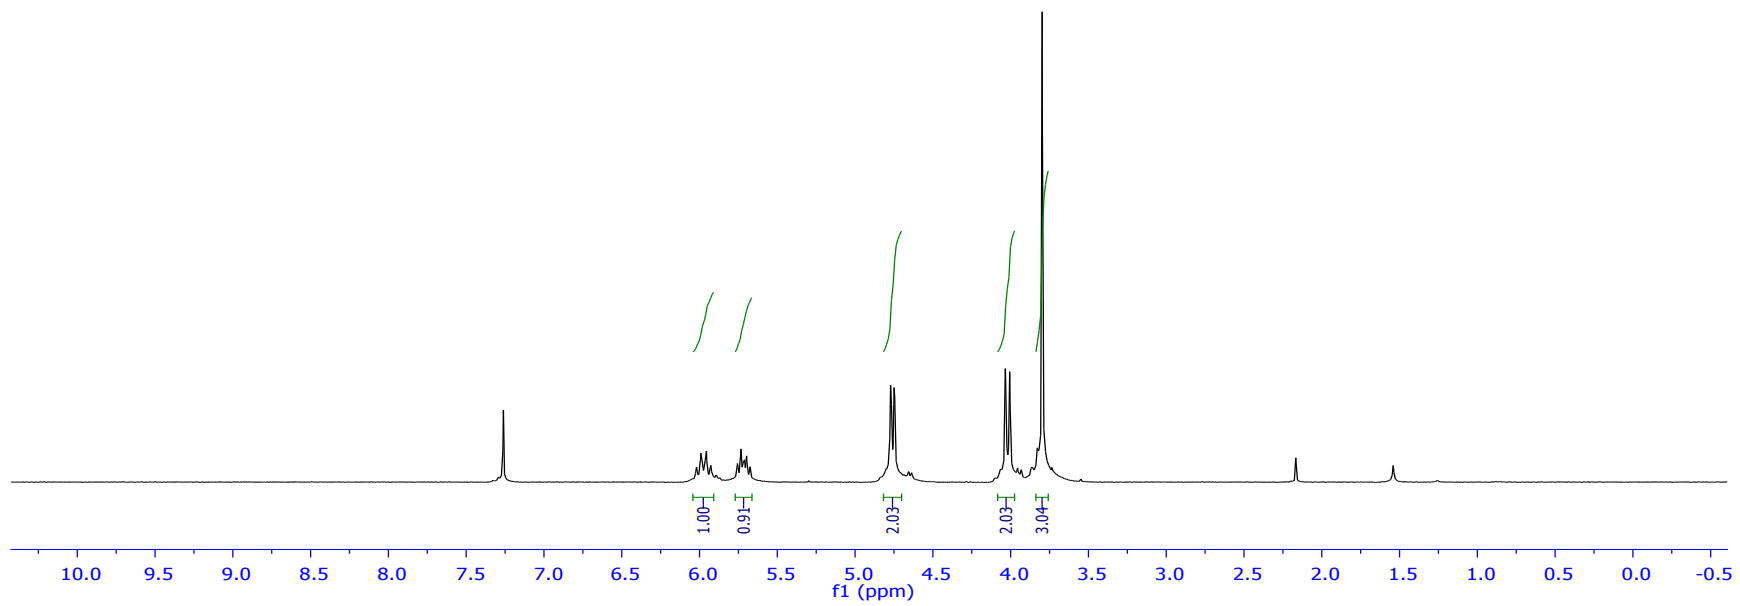



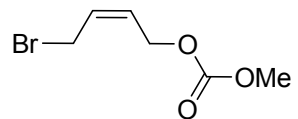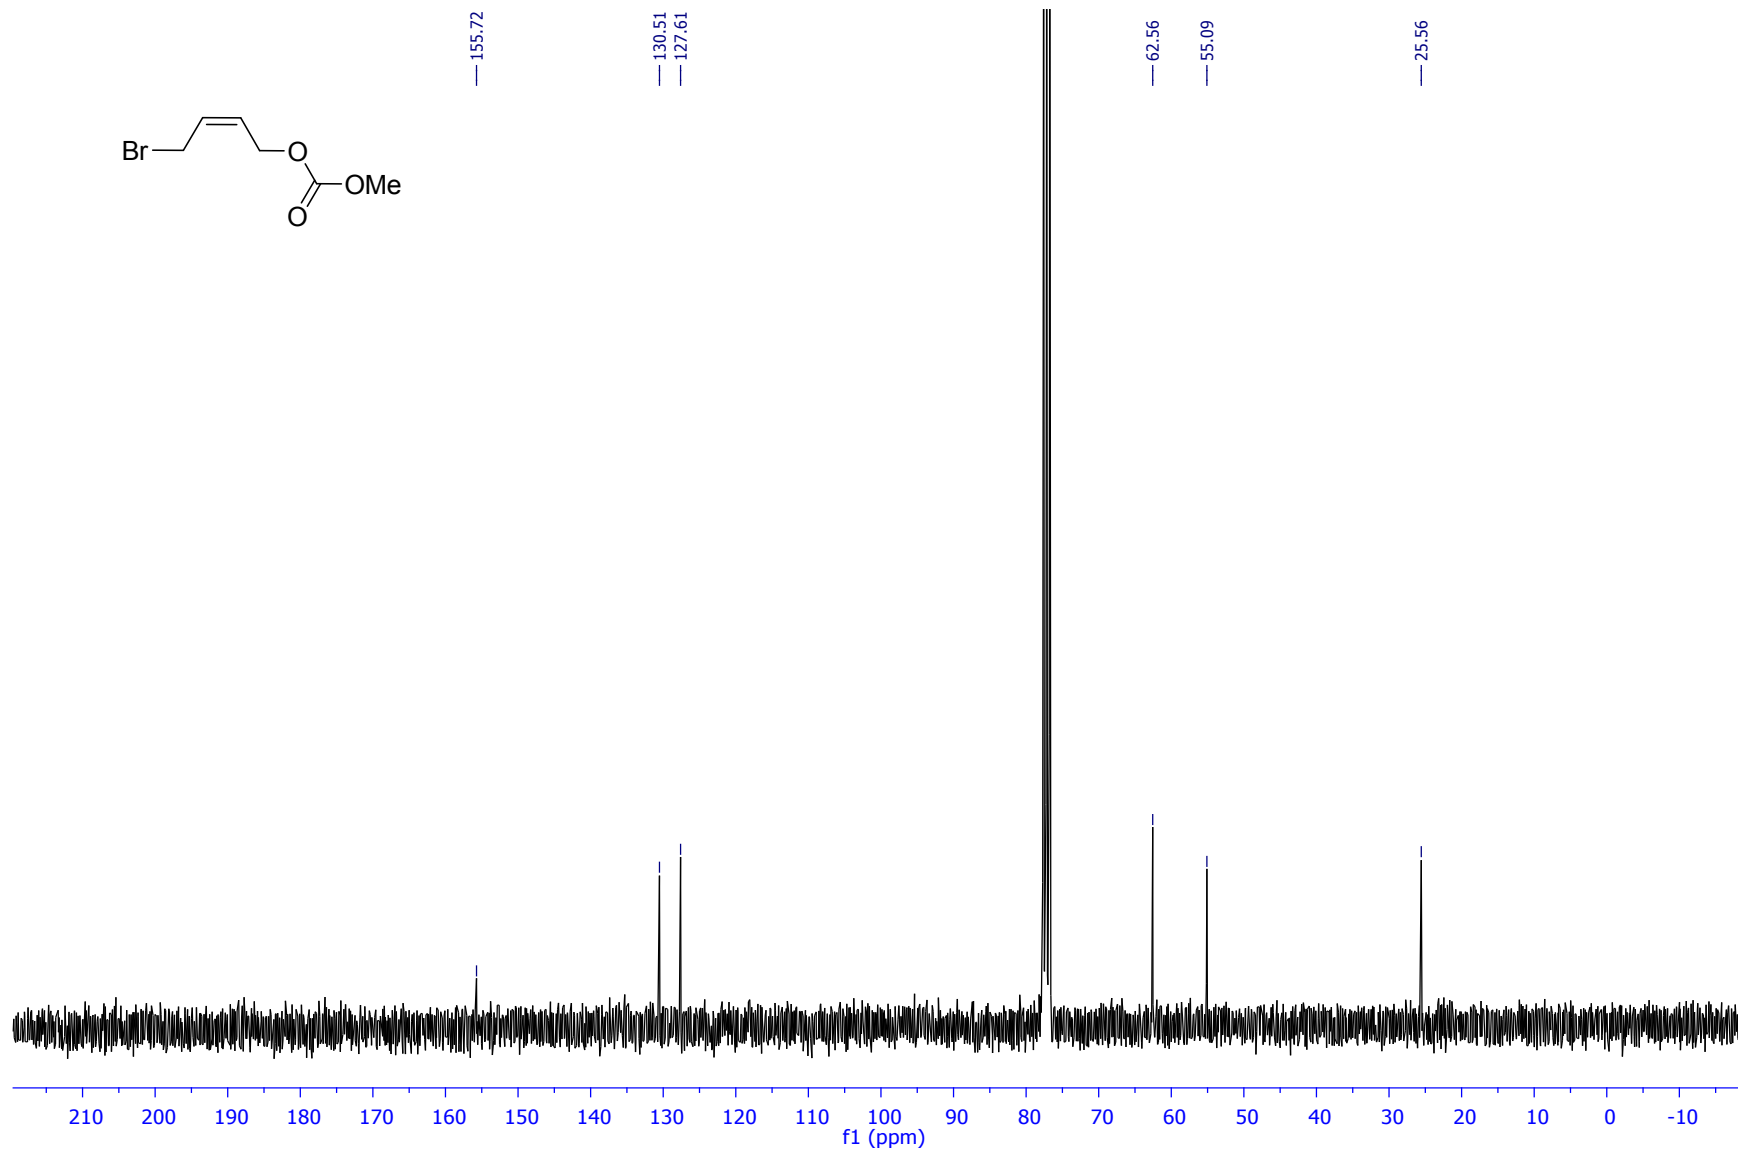

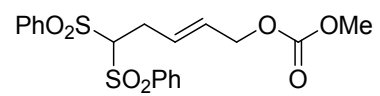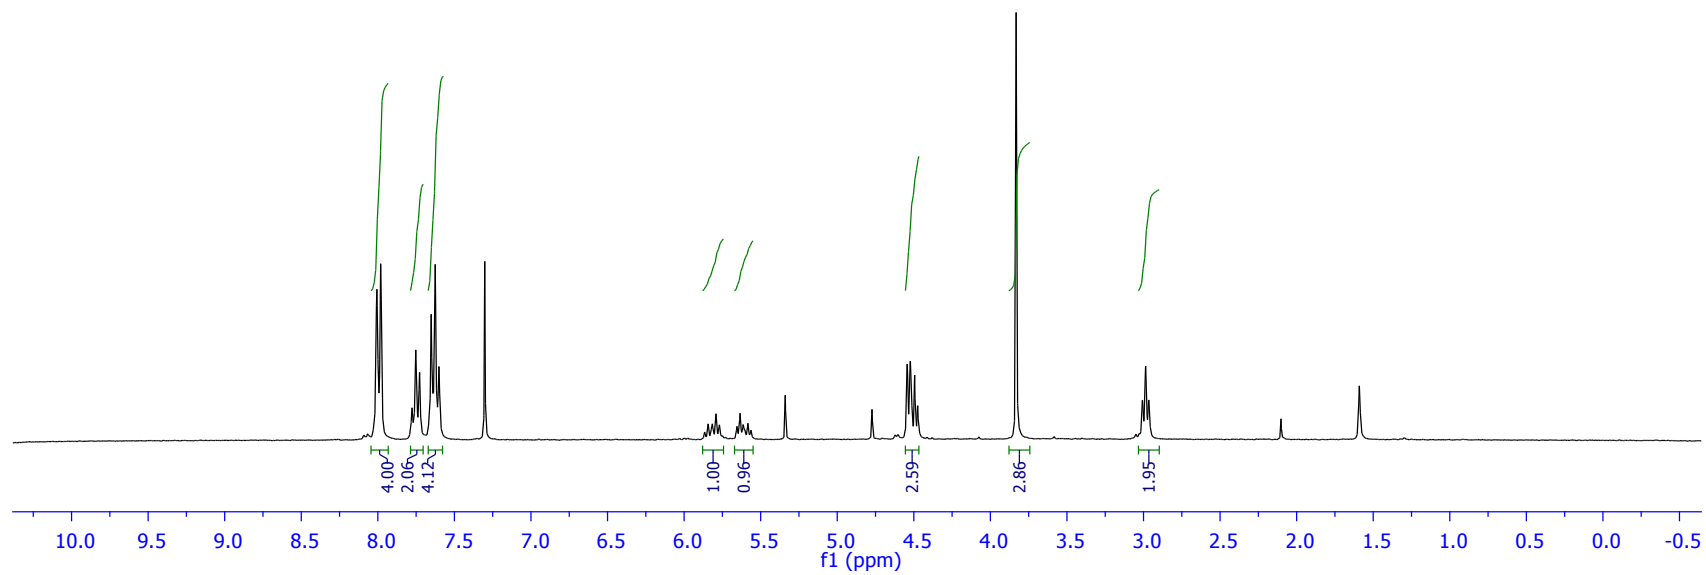

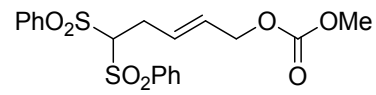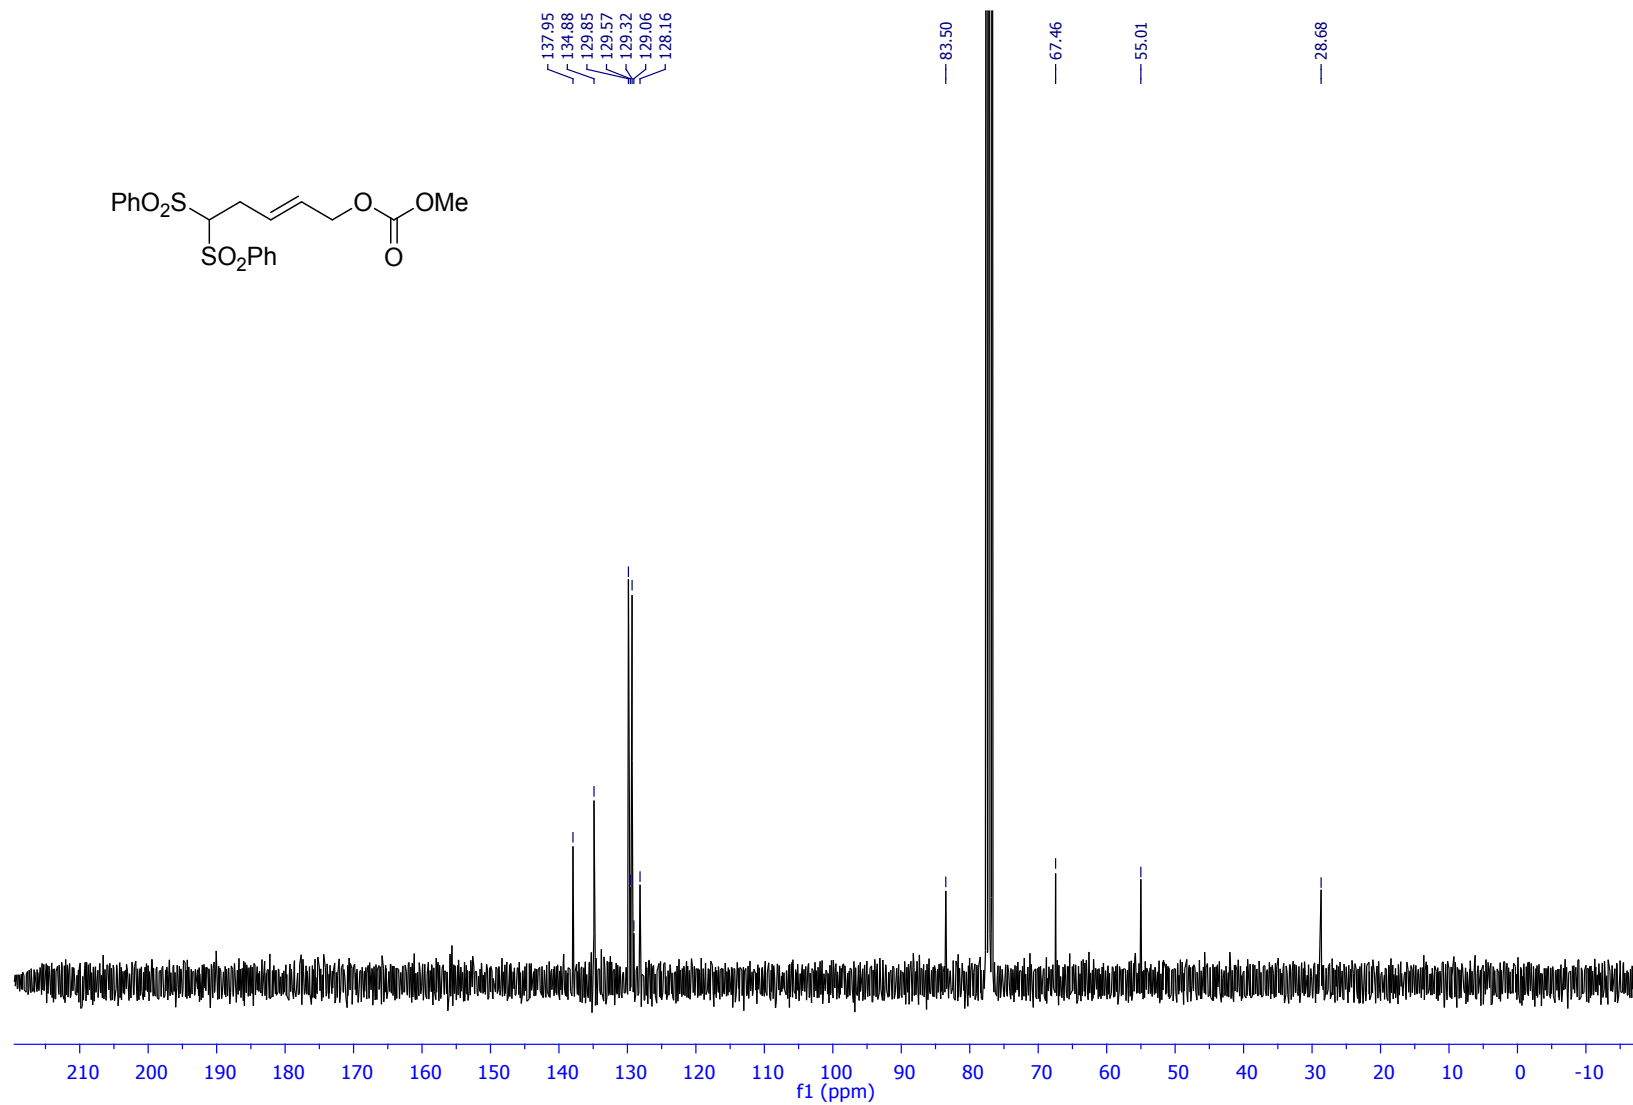

$^1\text{H-NMR}$  and  $^{13}\text{C-NMR}$  spectra of allylcarbonates

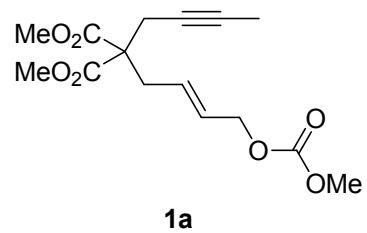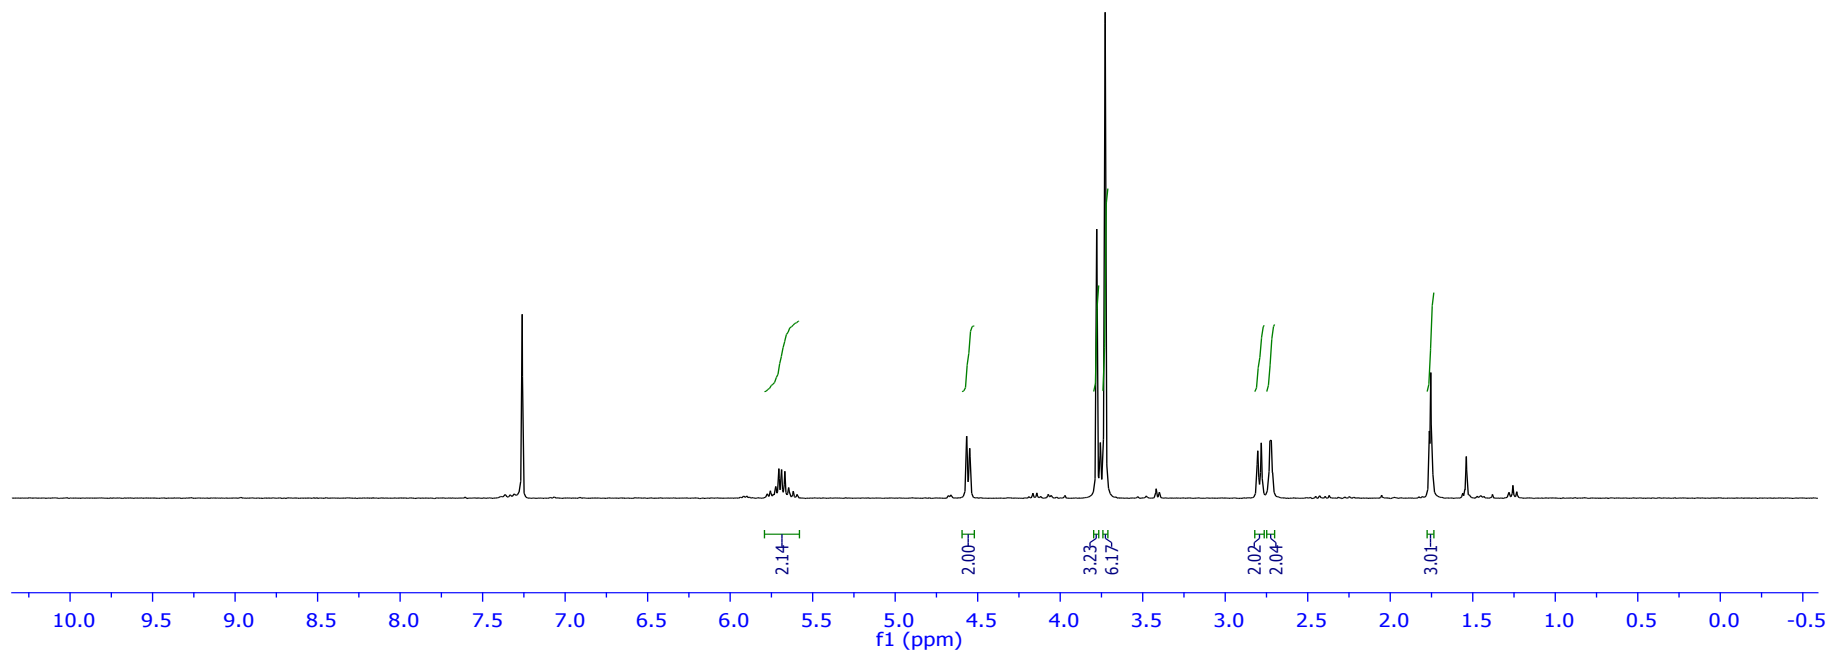

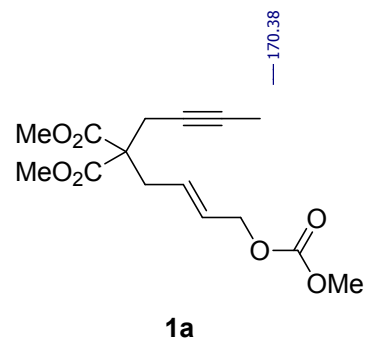

170.38

155.64

129.91

128.37

79.26

73.16

67.96

57.29

54.85

52.80

35.23

23.32

3.56

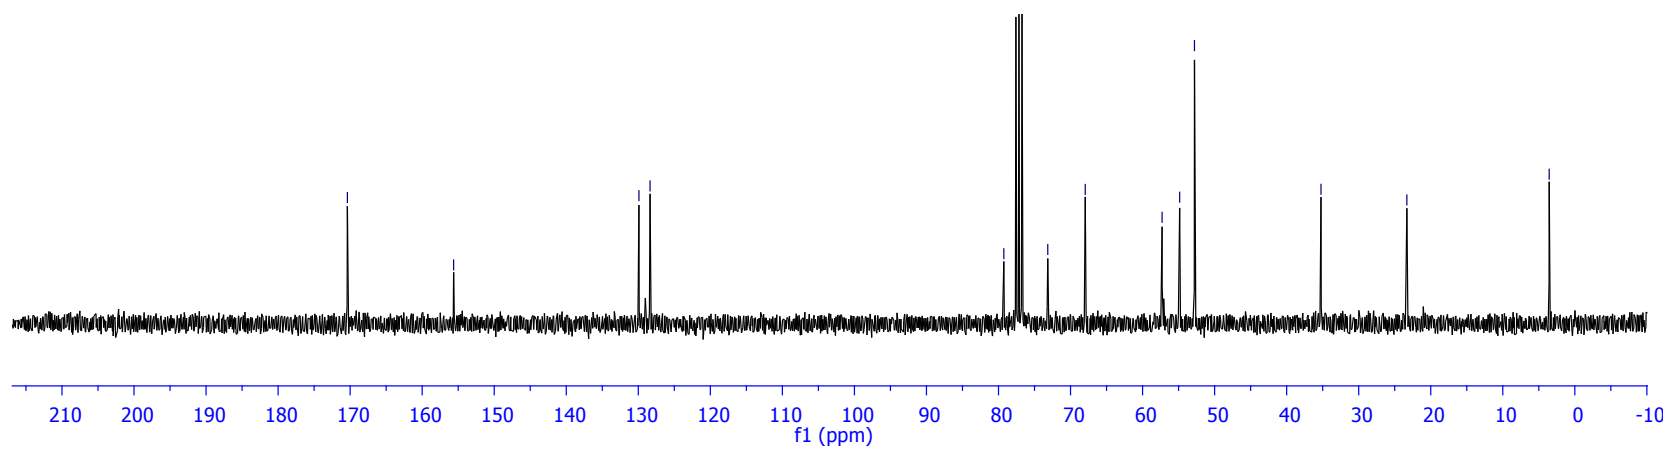

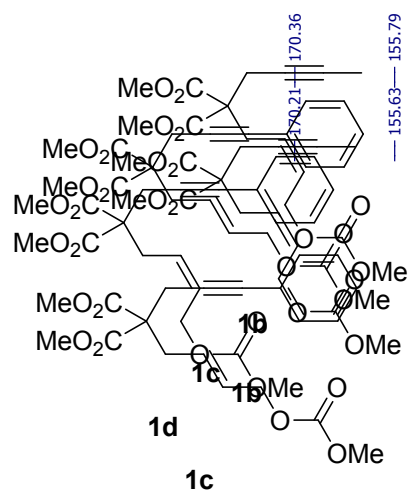

155.63 — 155.79

131.74  
129.66  
128.66  
128.32  
128.16  
123.15

84.05  
83.92

79.42  
73.20

67.90  
63.64

57.33  
54.87  
52.93

35.44  
30.44

23.92  
23.24

3.52

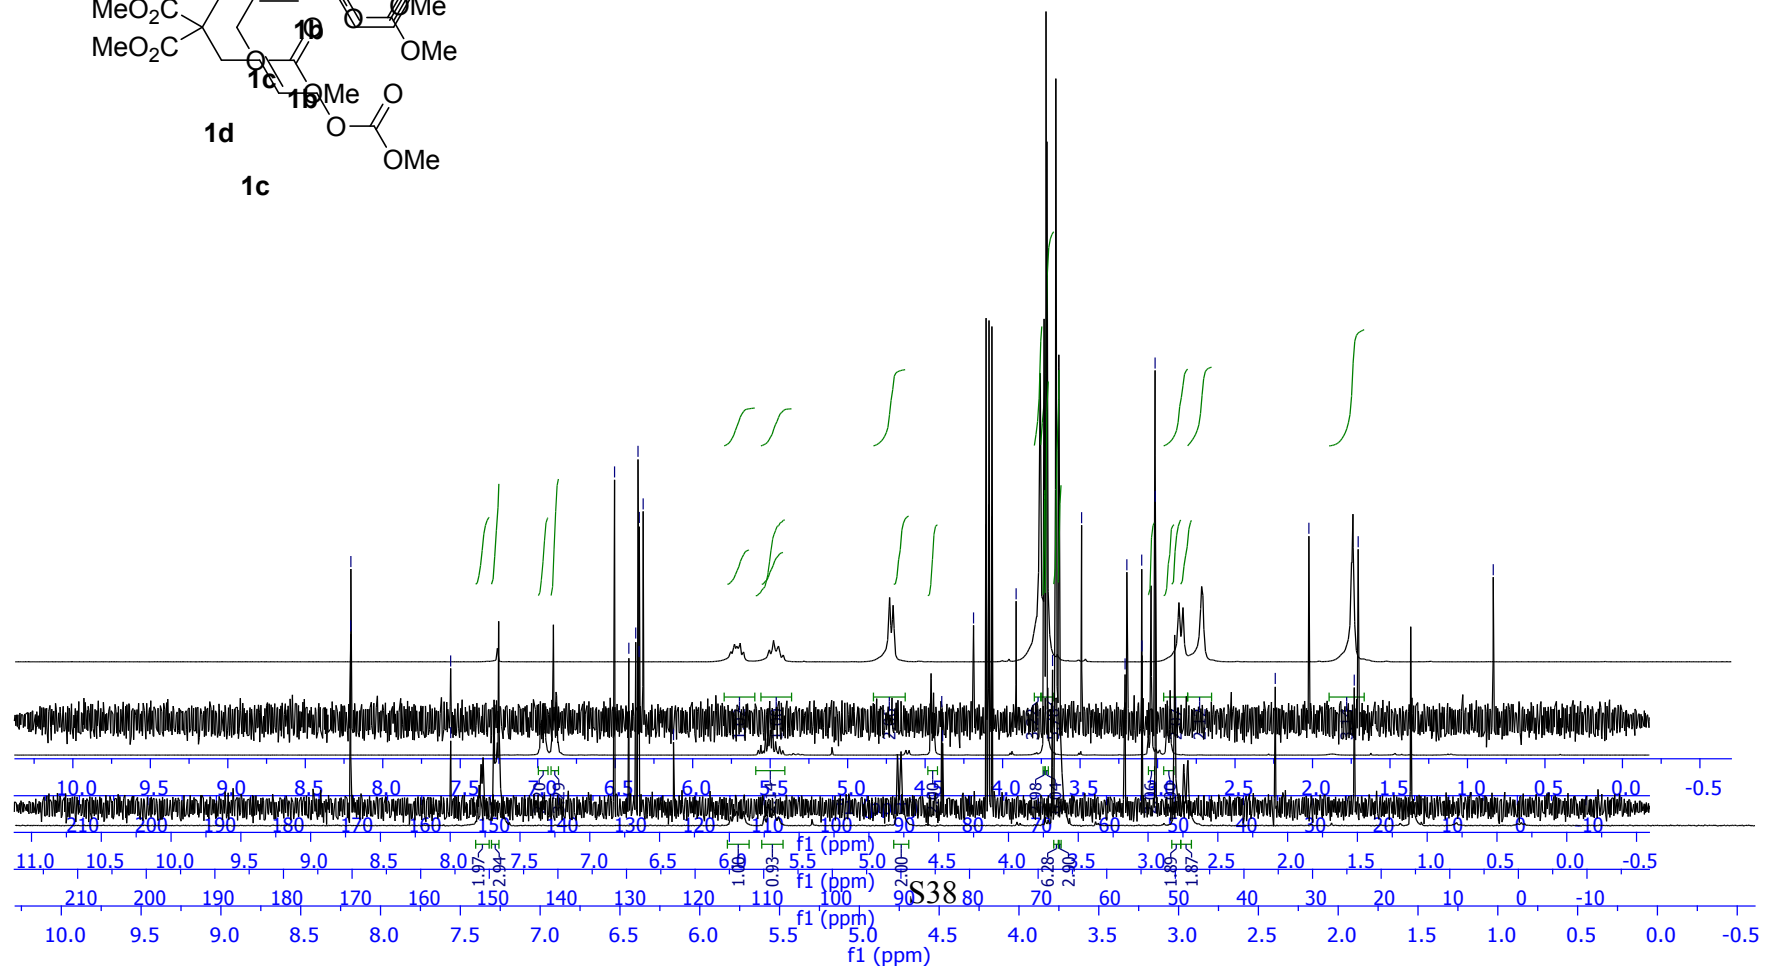

10.0 9.5 9.0 8.5 8.0 7.5 7.0 6.5 6.0 5.5 5.0 4.5 4.0 3.5 3.0 2.5 2.0 1.5 1.0 0.5 0.0 -0.5

210 200 190 180 170 160 150 140 130 120 110 100 90 80 70 60 50 40 30 20 10 0 -10 -20

11.0 10.5 10.0 9.5 9.0 8.5 8.0 7.5 7.0 6.5 6.0 5.5 5.0 4.5 4.0 3.5 3.0 2.5 2.0 1.5 1.0 0.5 0.0 -0.5

210 200 190 180 170 160 150 140 130 120 110 100 90 80 70 60 50 40 30 20 10 0 -10 -20

10.0 9.5 9.0 8.5 8.0 7.5 7.0 6.5 6.0 5.5 5.0 4.5 4.0 3.5 3.0 2.5 2.0 1.5 1.0 0.5 0.0 -0.5

f1 (ppm)

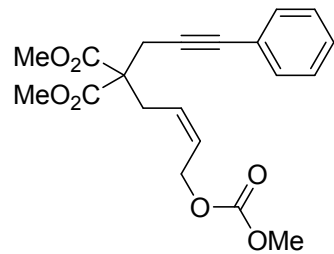

1d

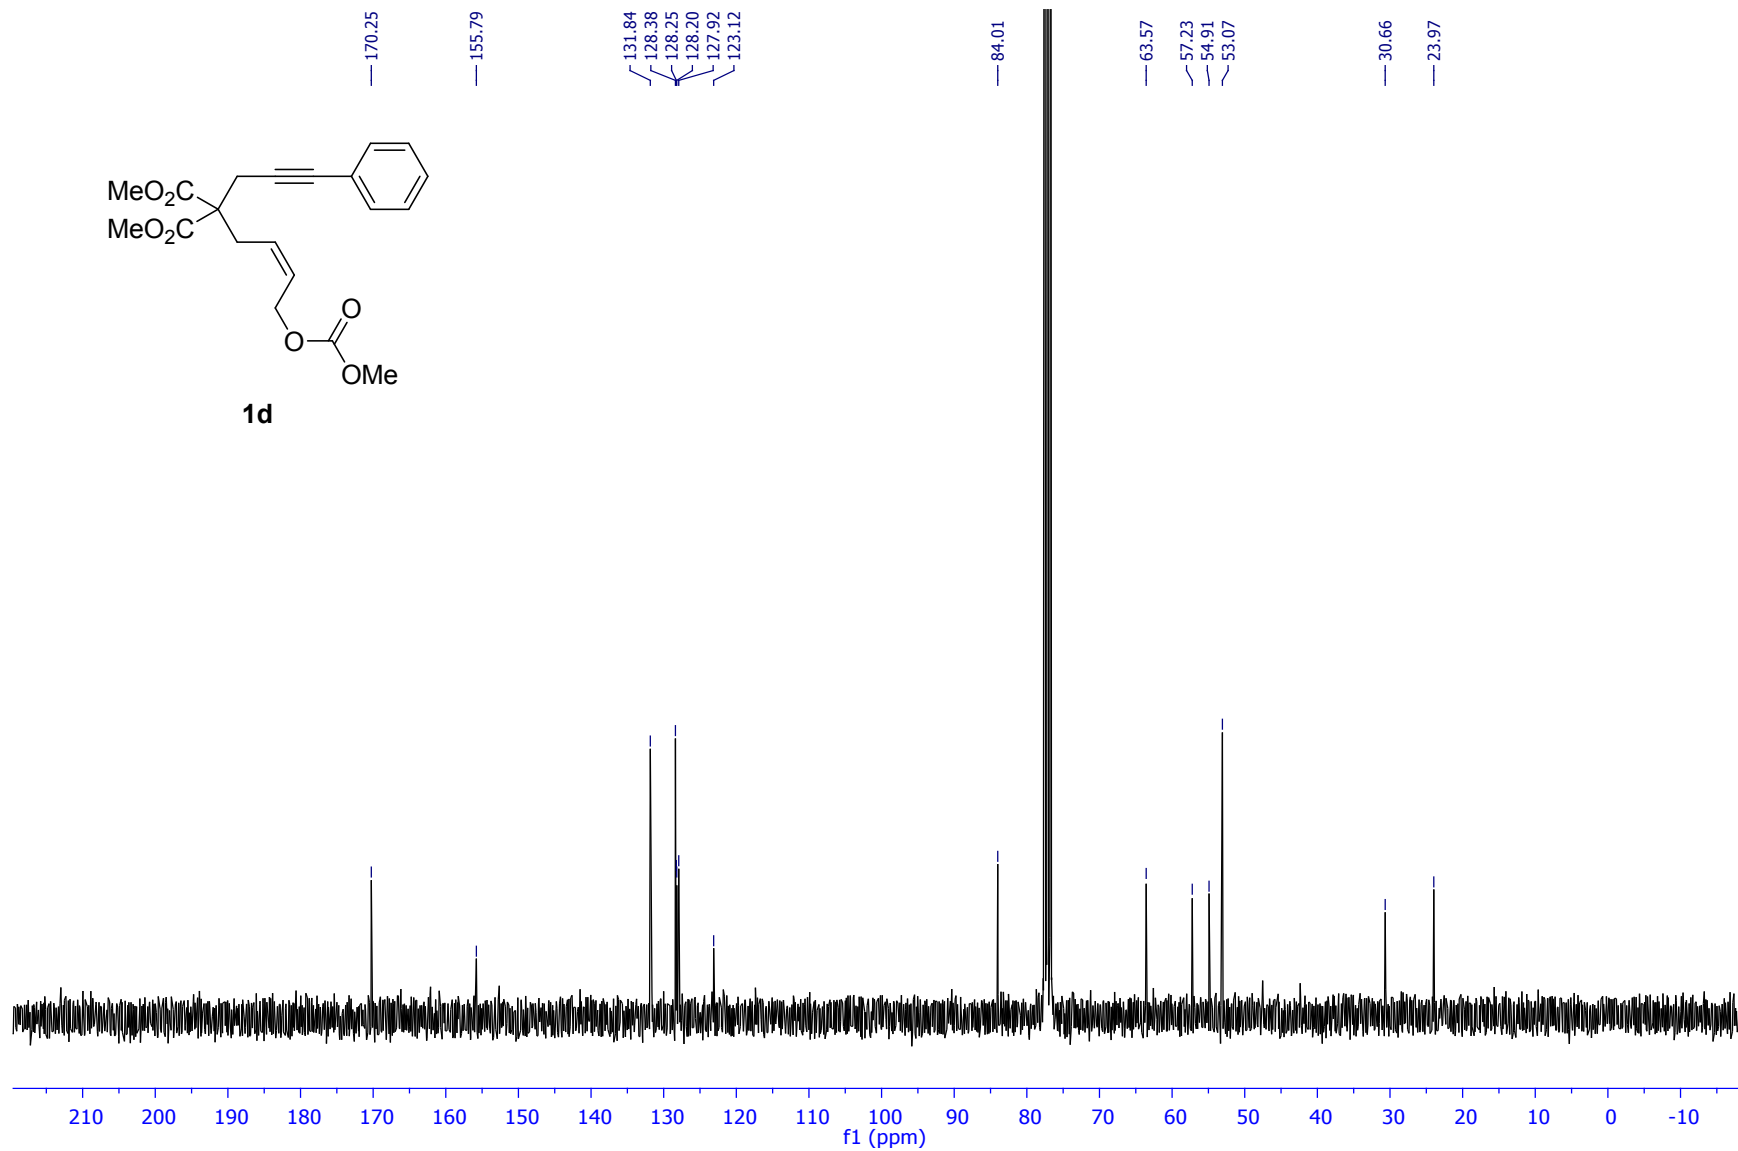

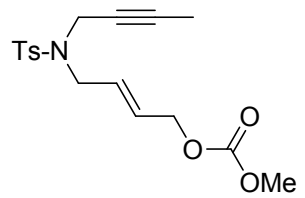

1e

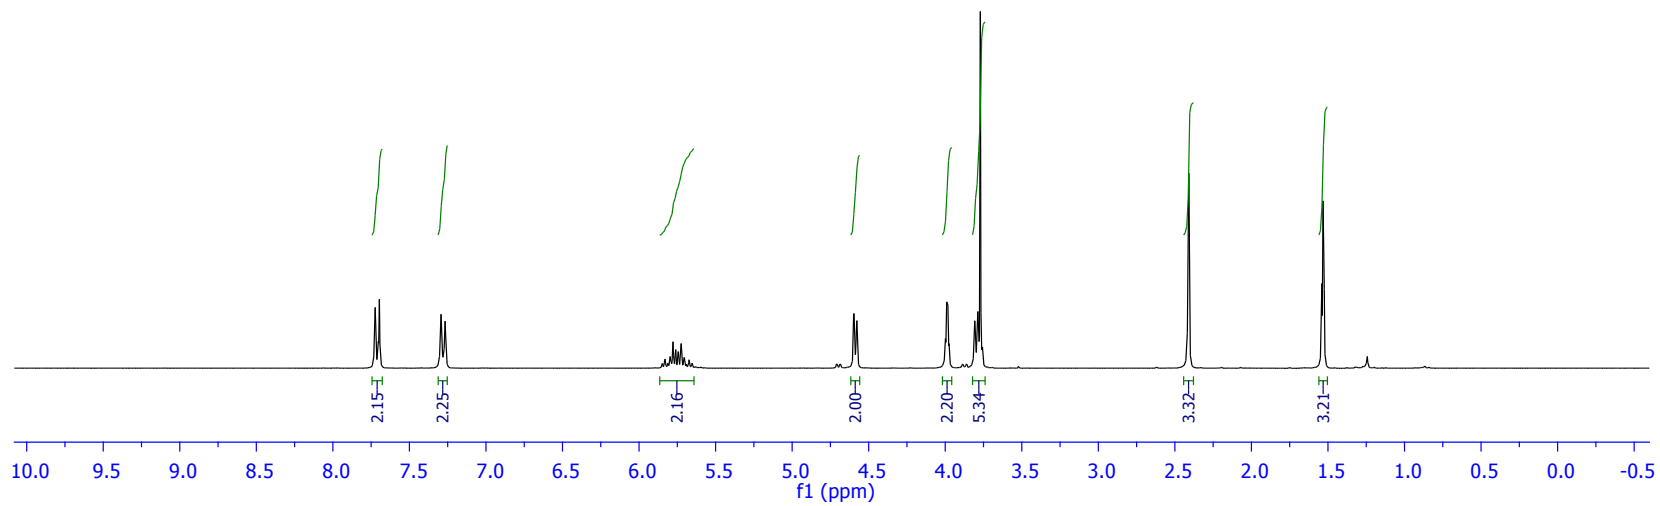



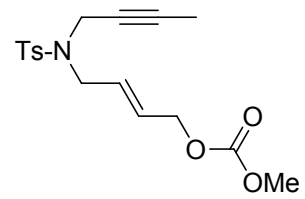

**1e**

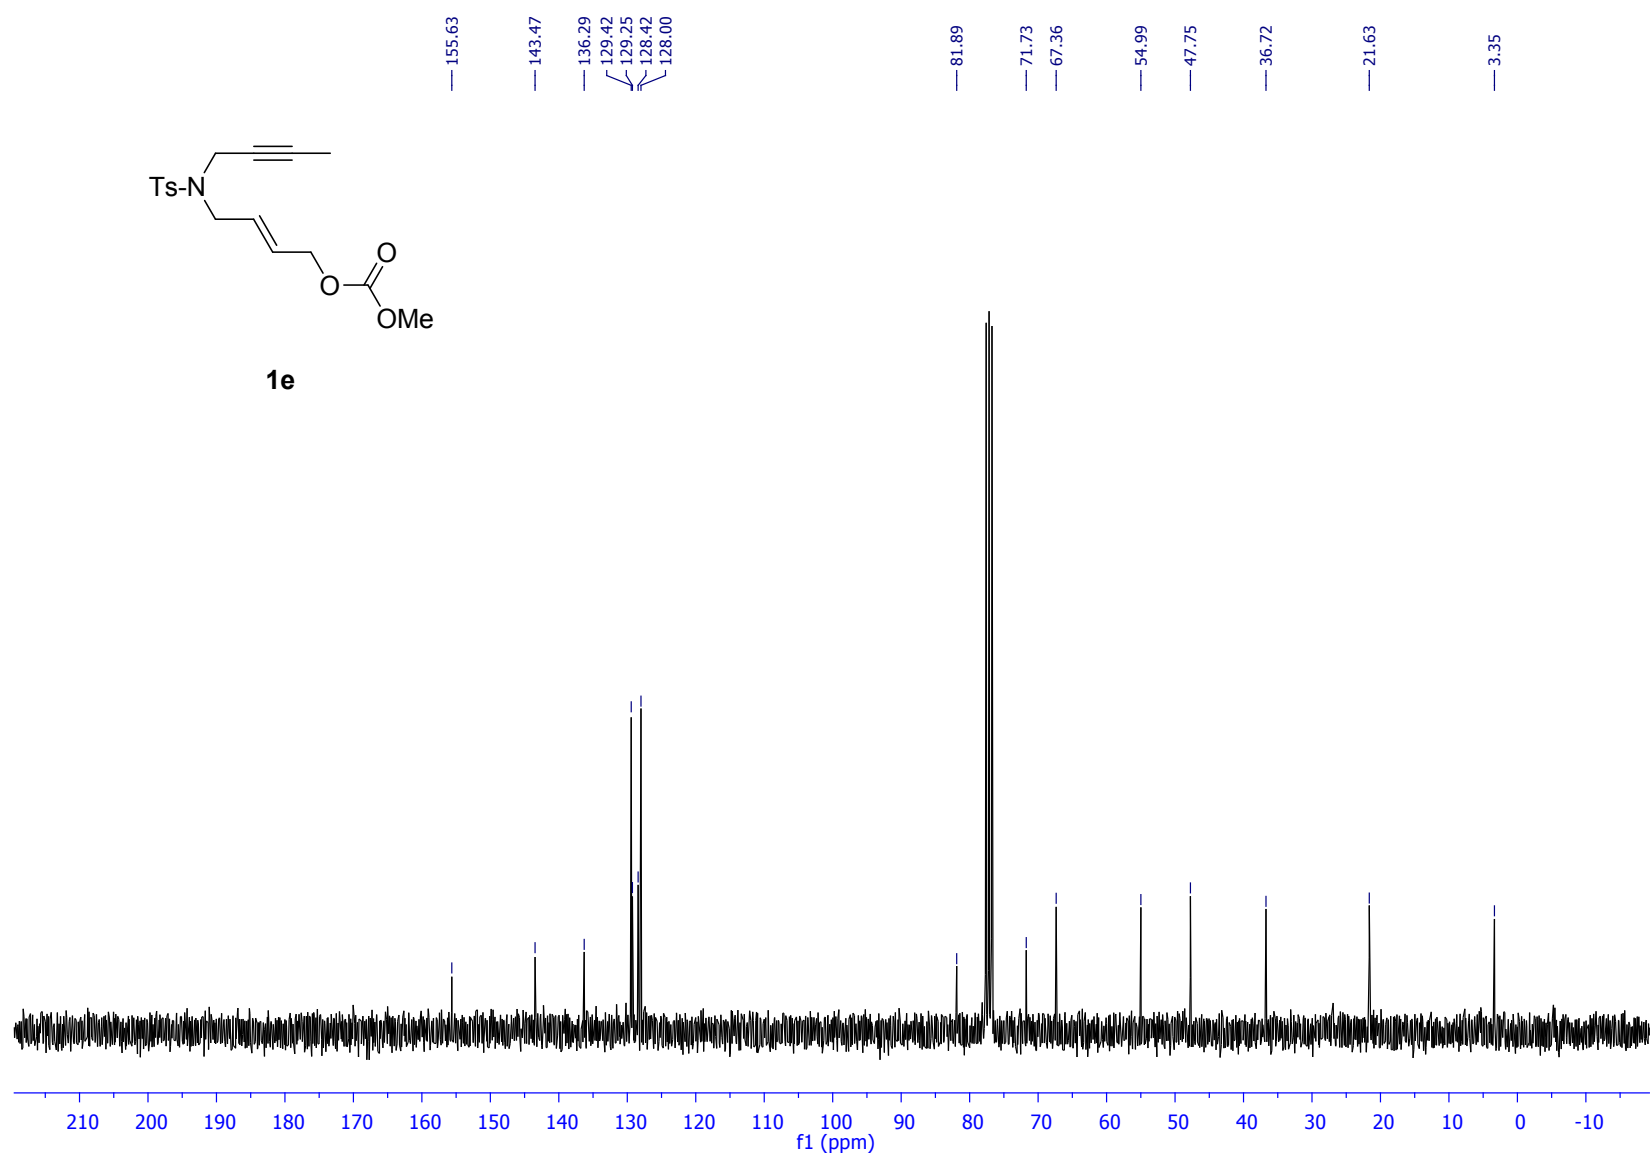

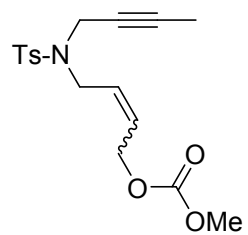

(Z/E) 1:1.4

**1f**

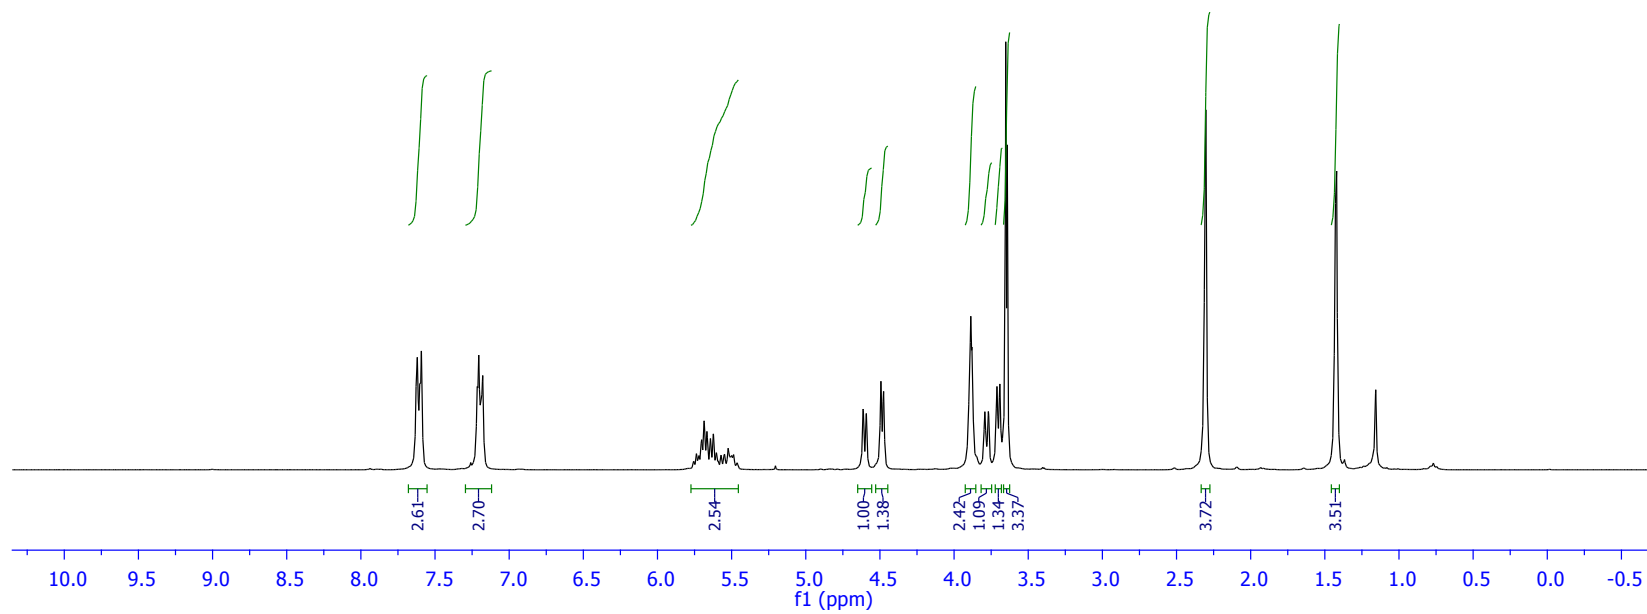

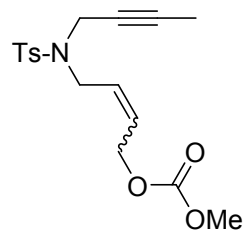

(Z/E) 1:1.4

**1f**

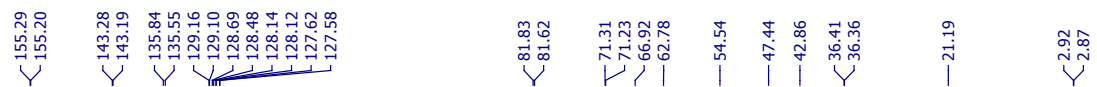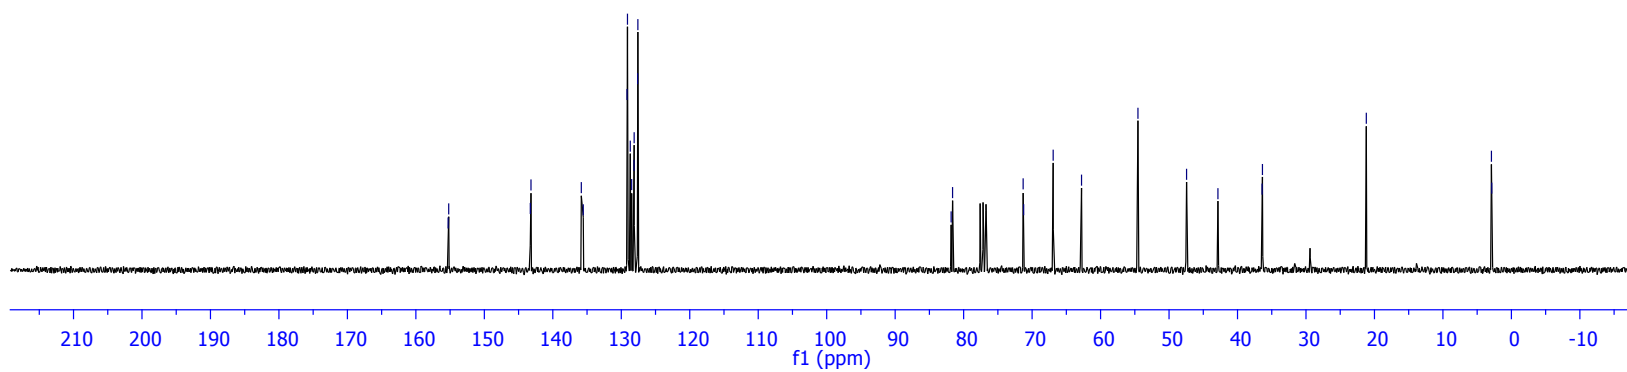

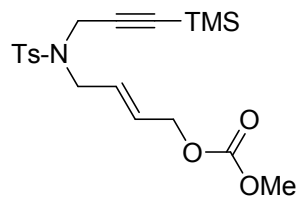

**1g**

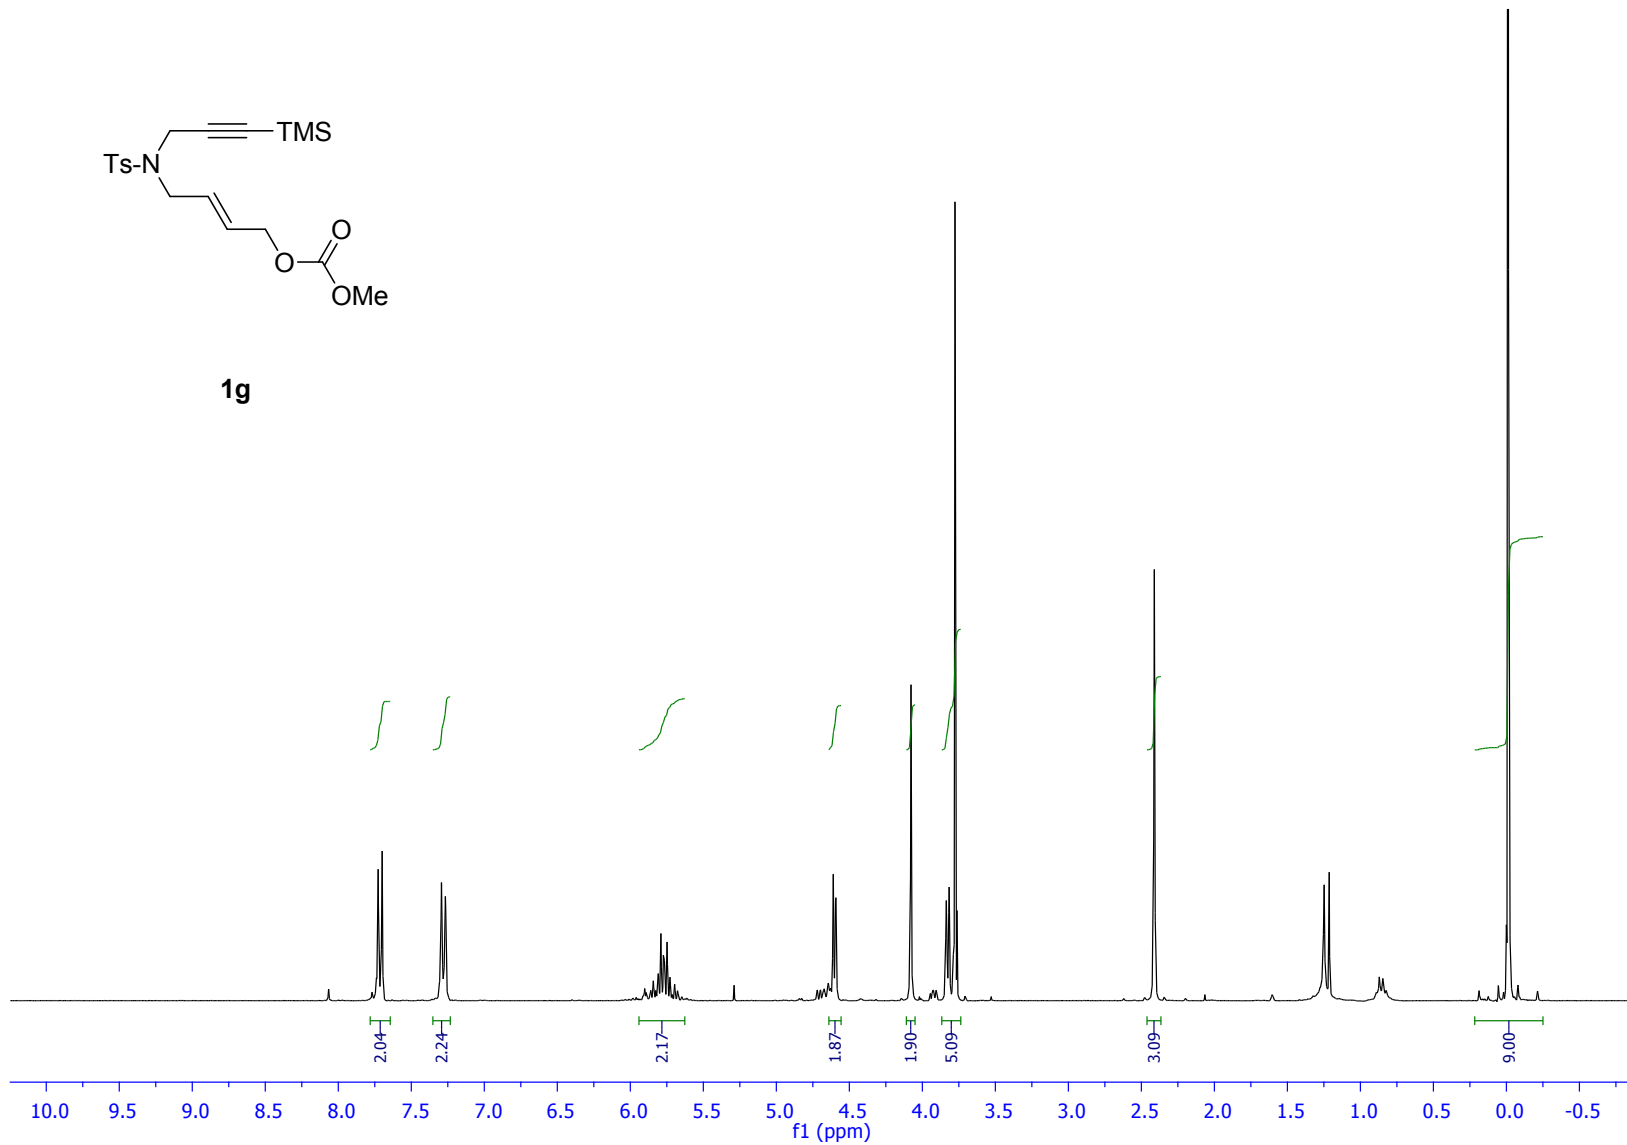

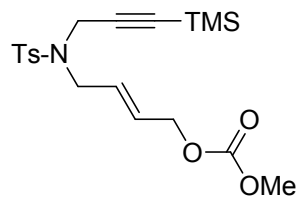

**1g**

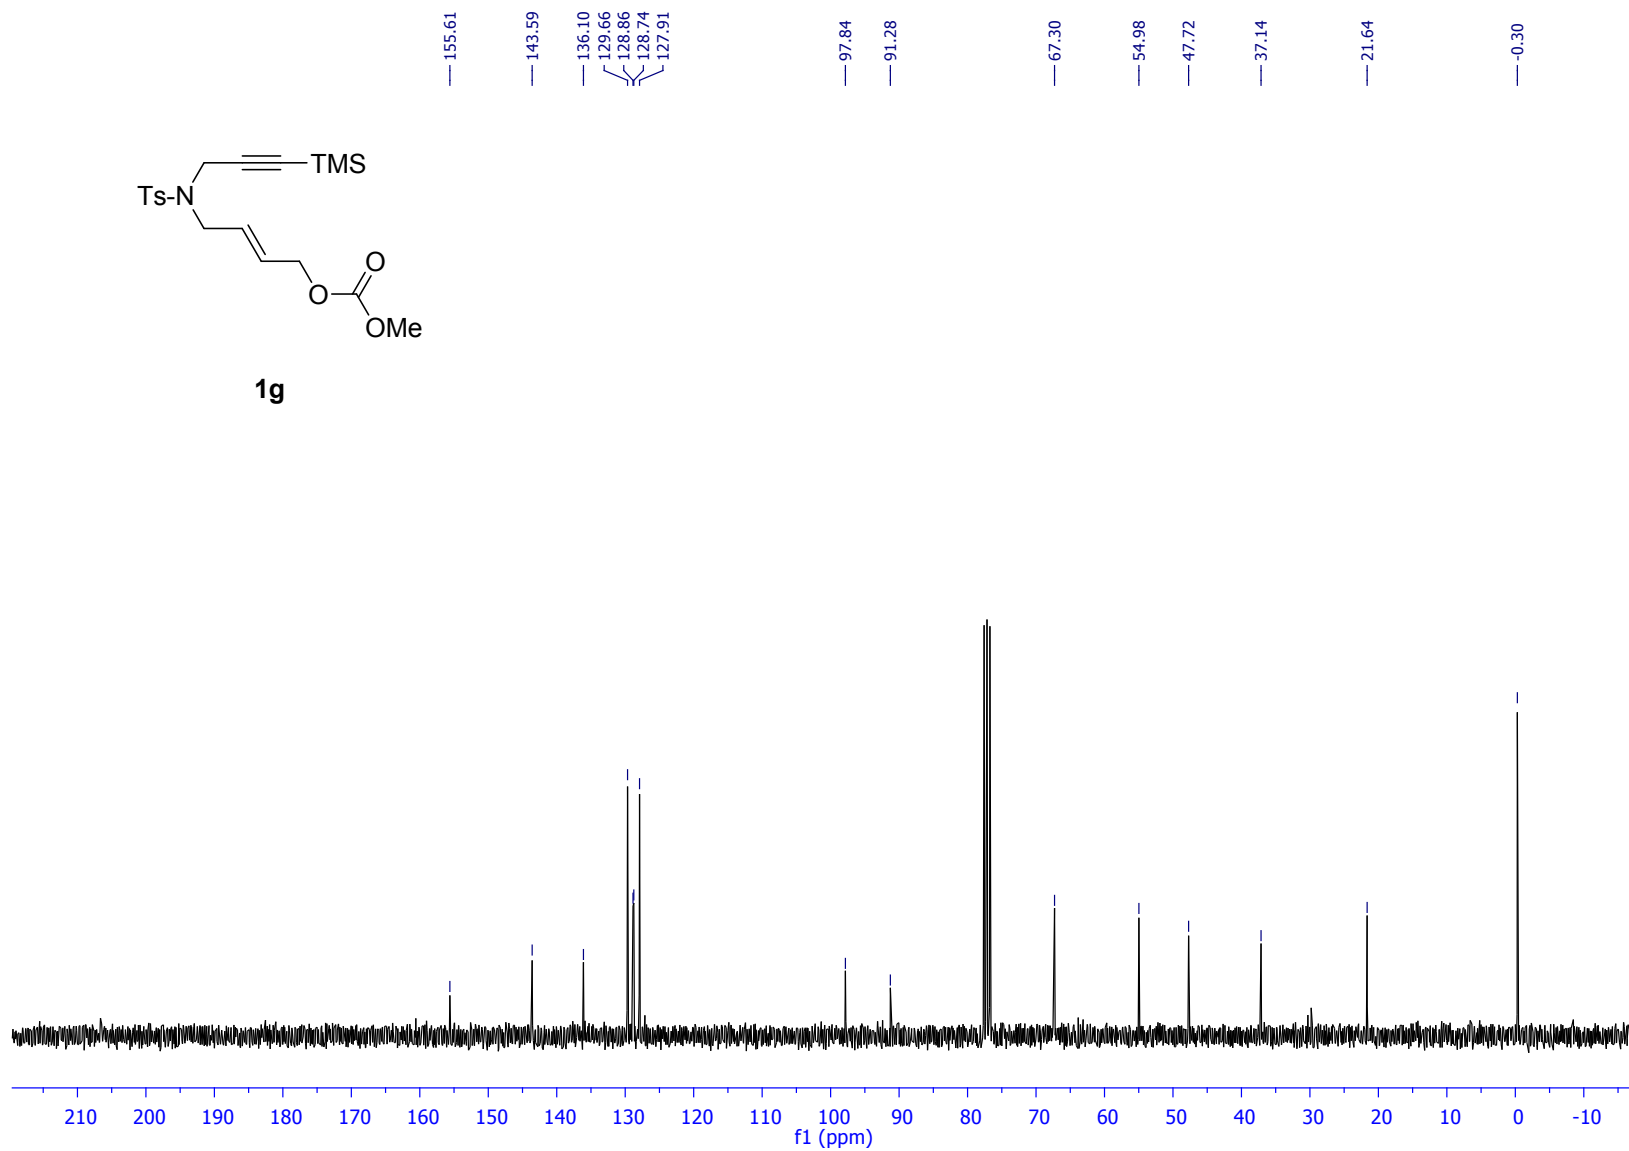

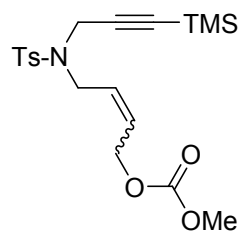

(Z/E) 0.4:1

**1h**

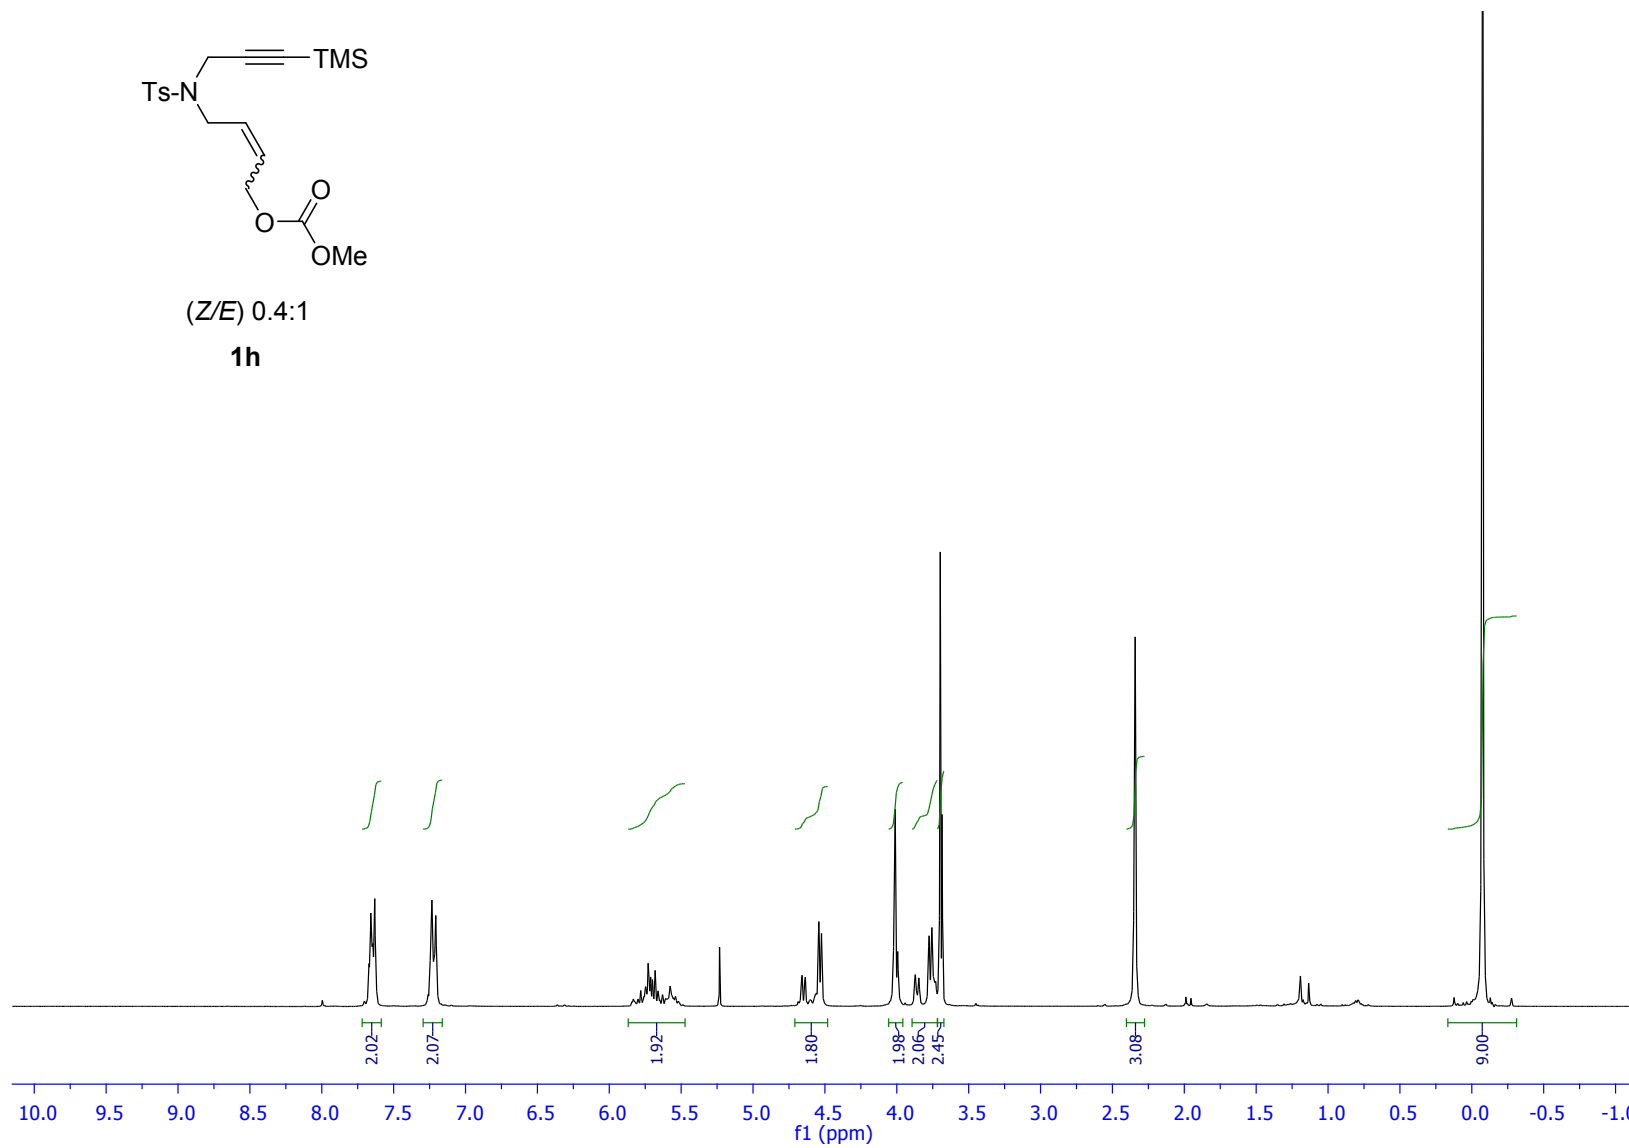

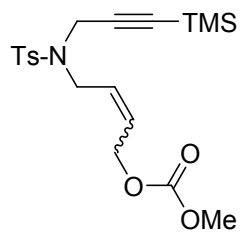

(Z/E) 0.4:1

**1h**

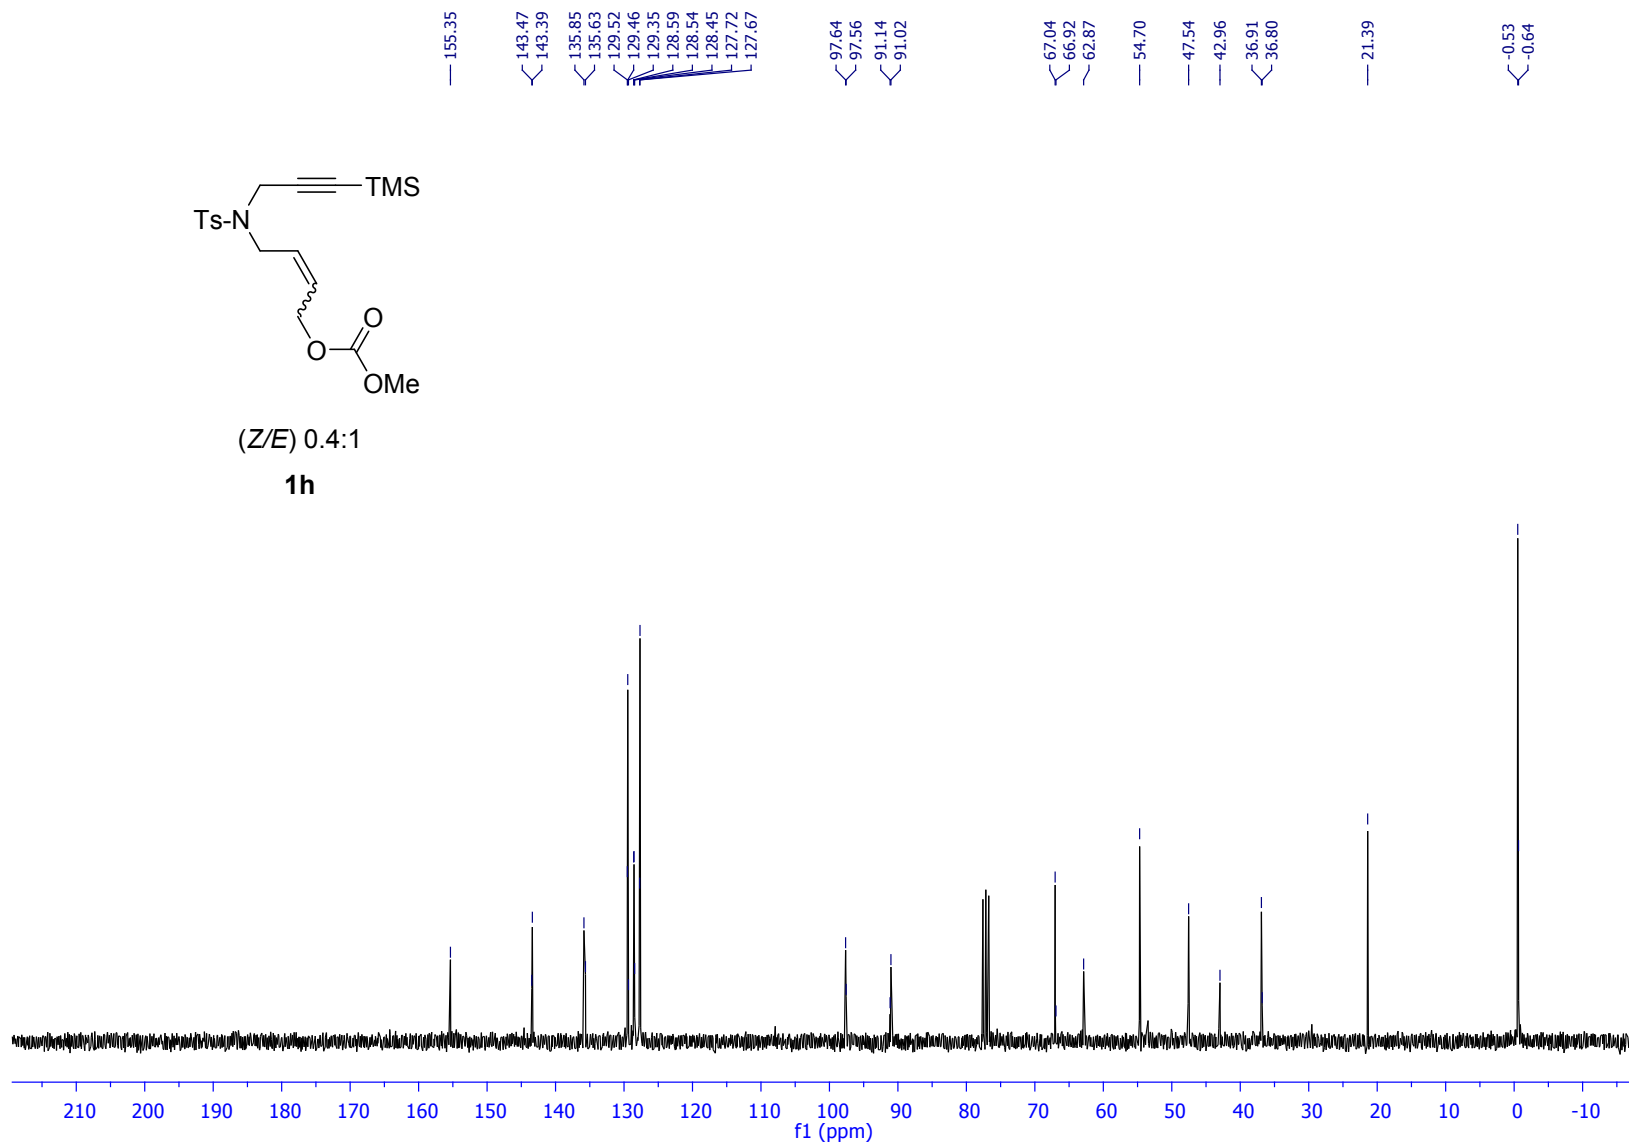

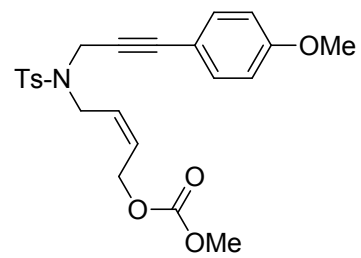

**1i**

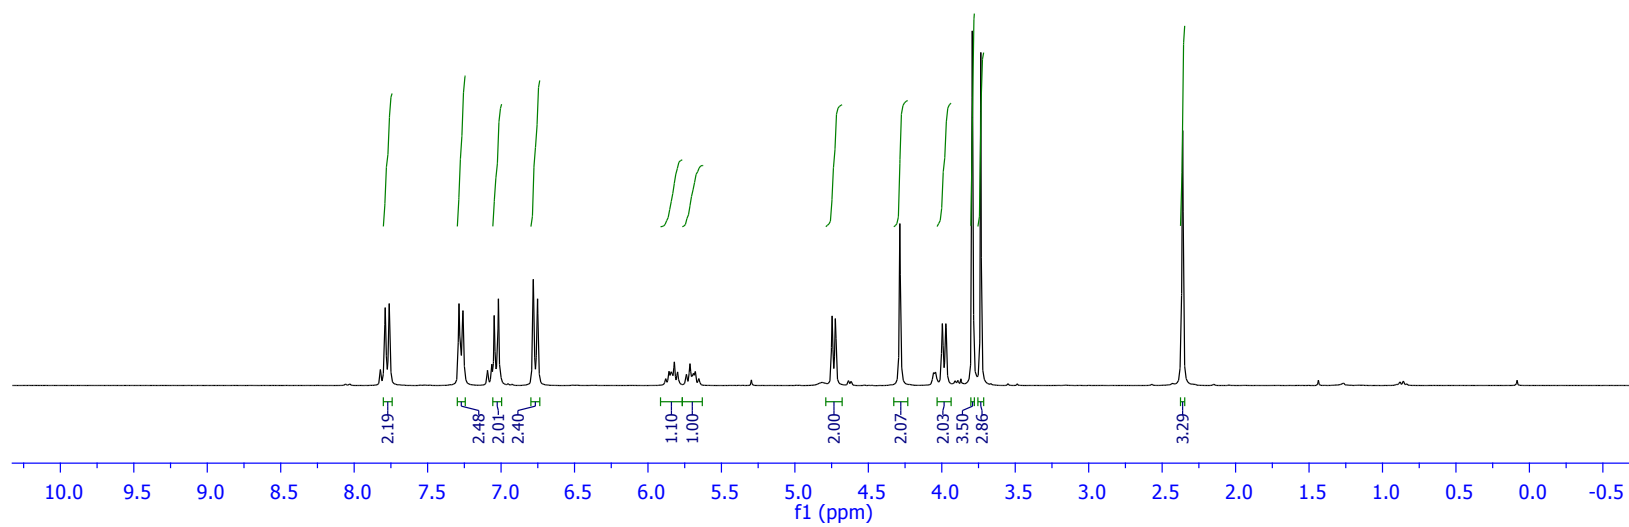



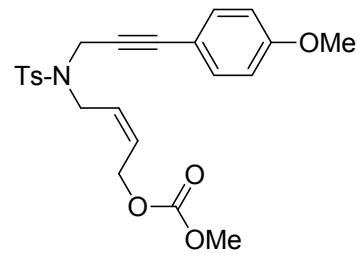

**1i**

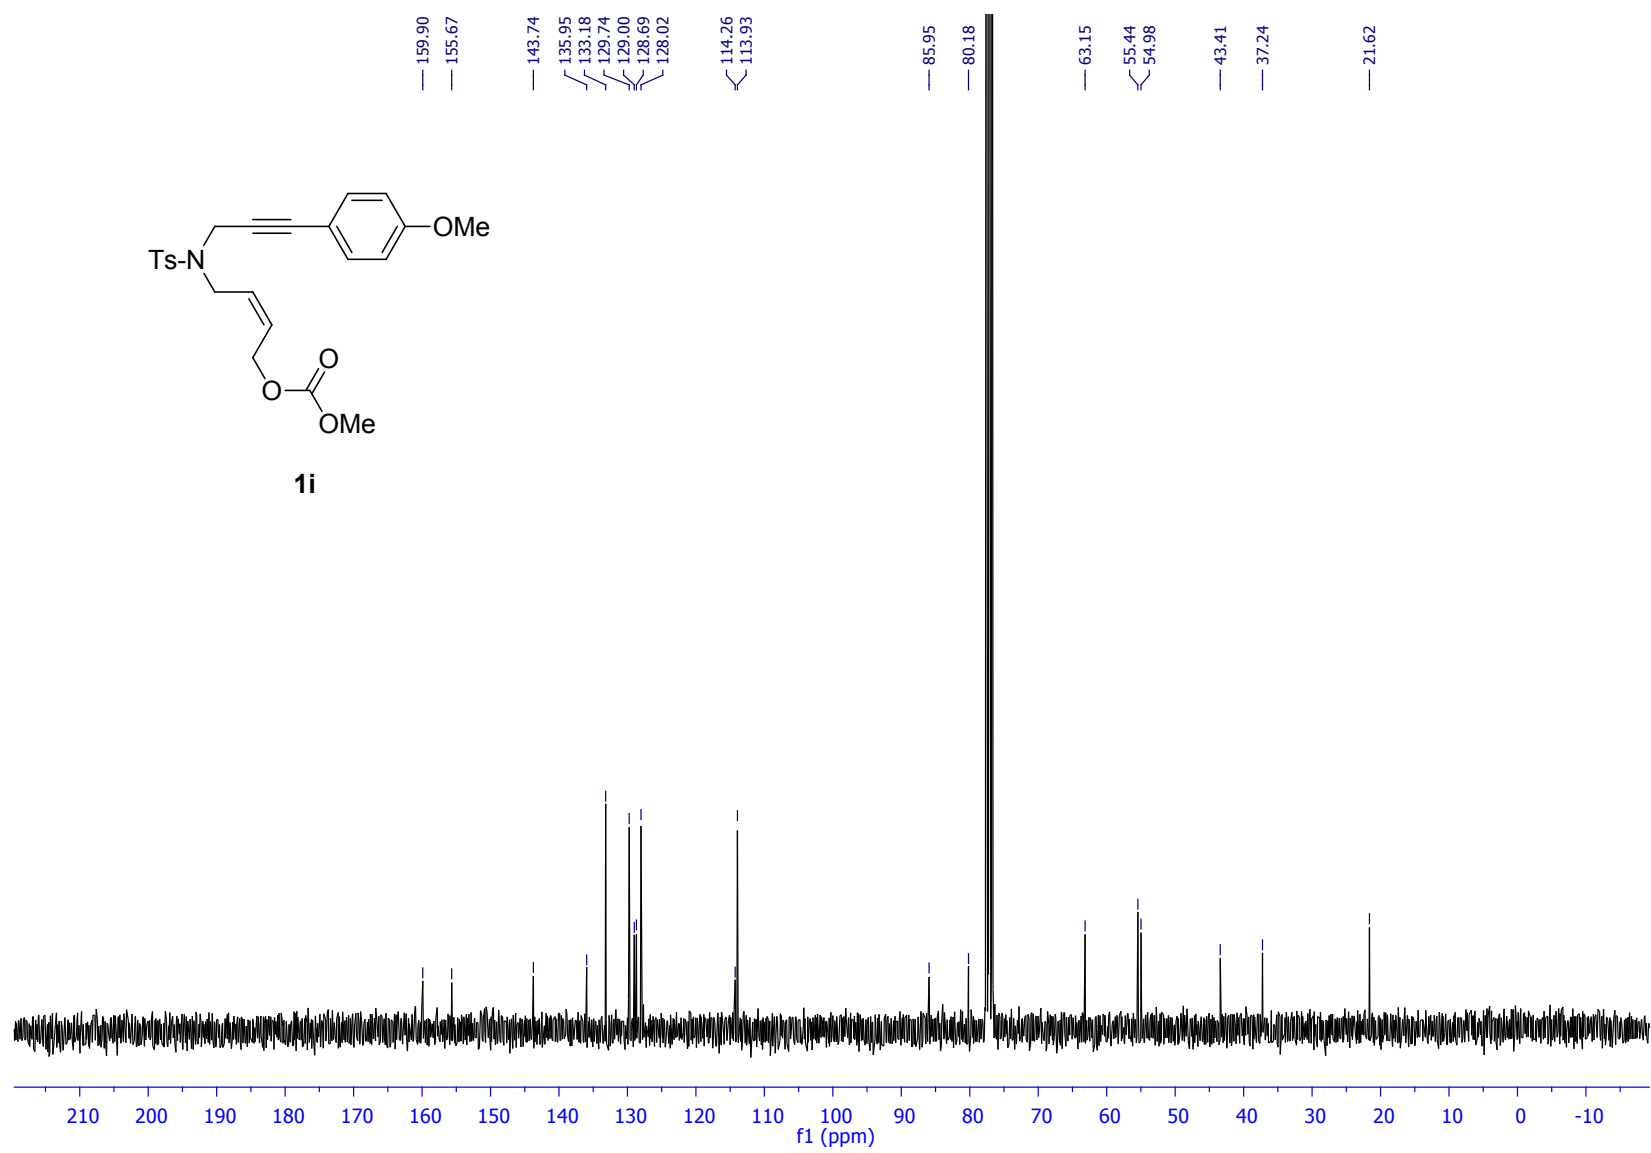

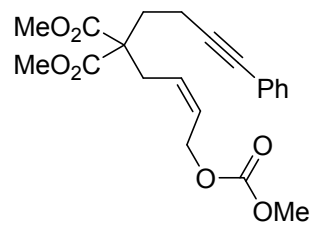

1j

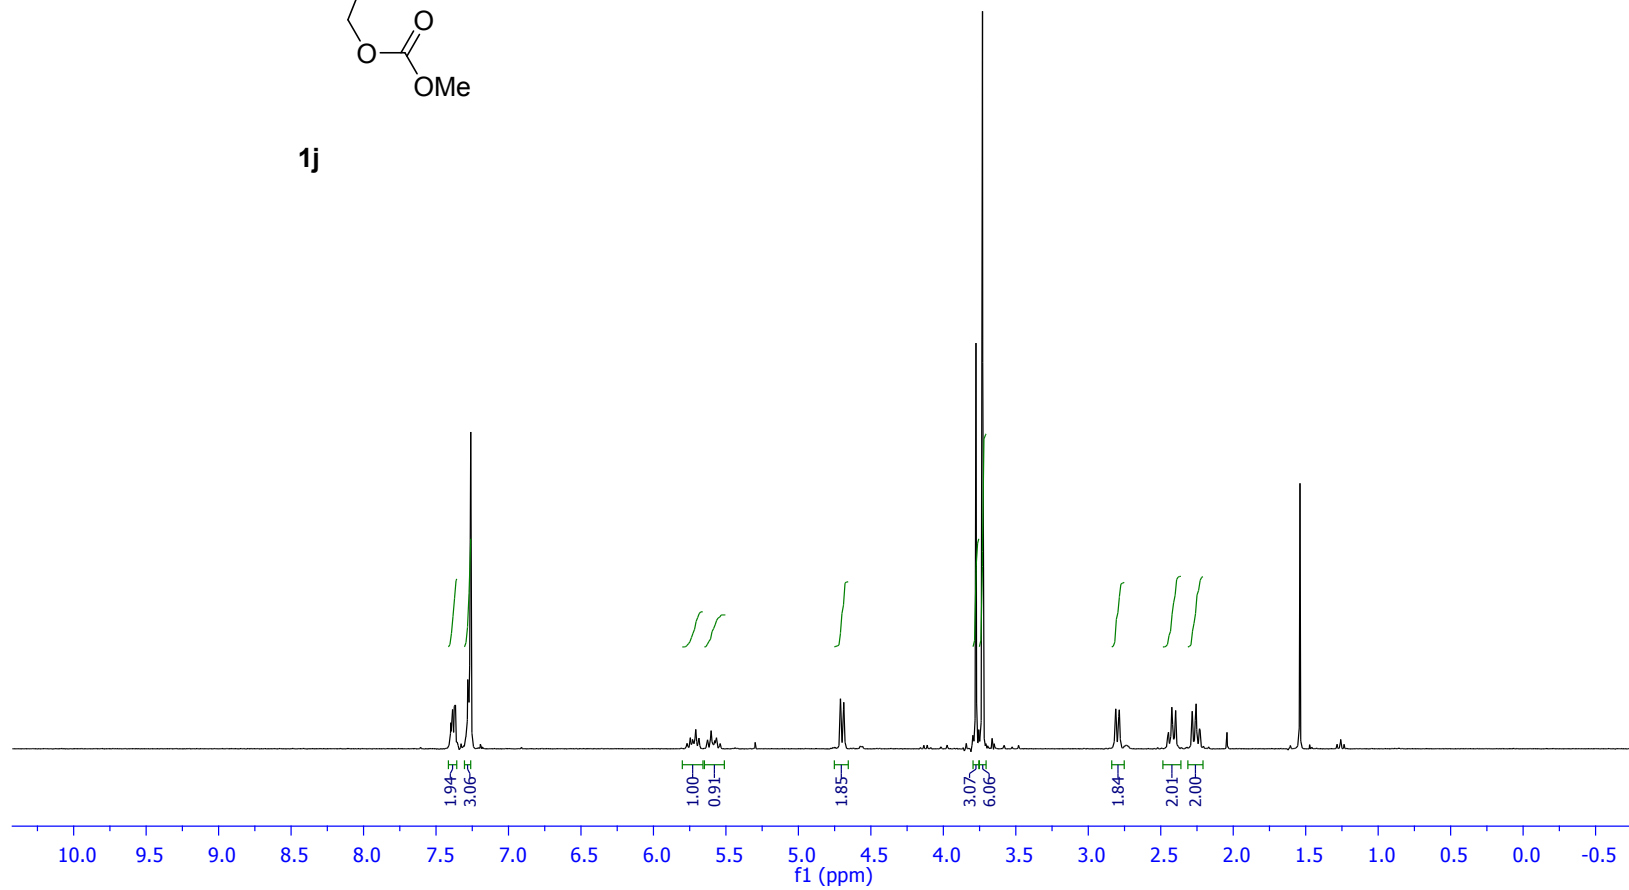

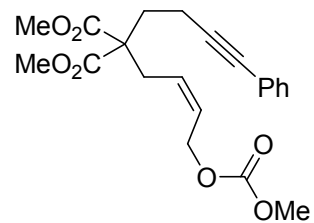

1j

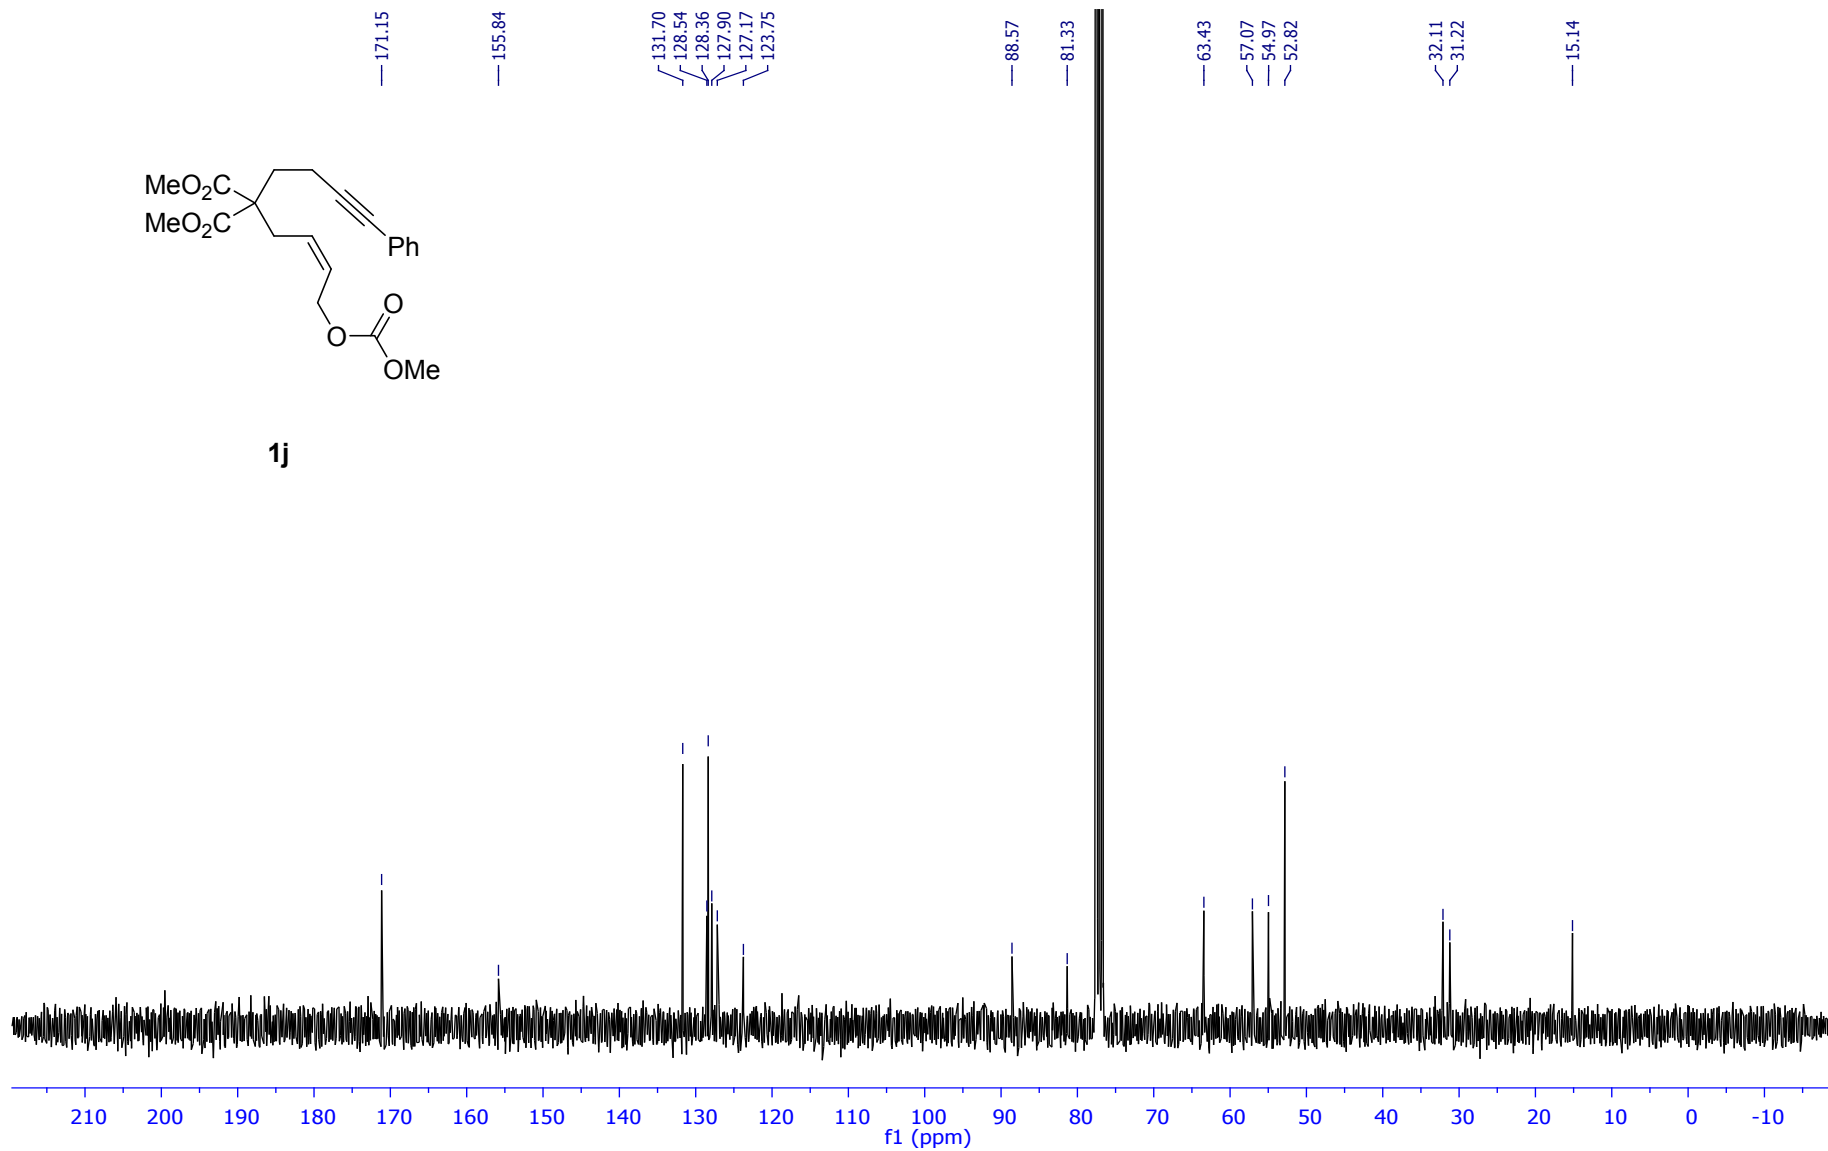

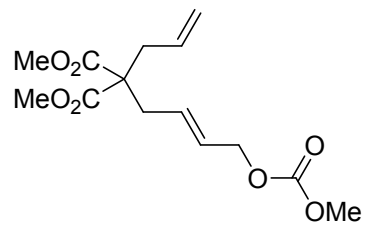

1k

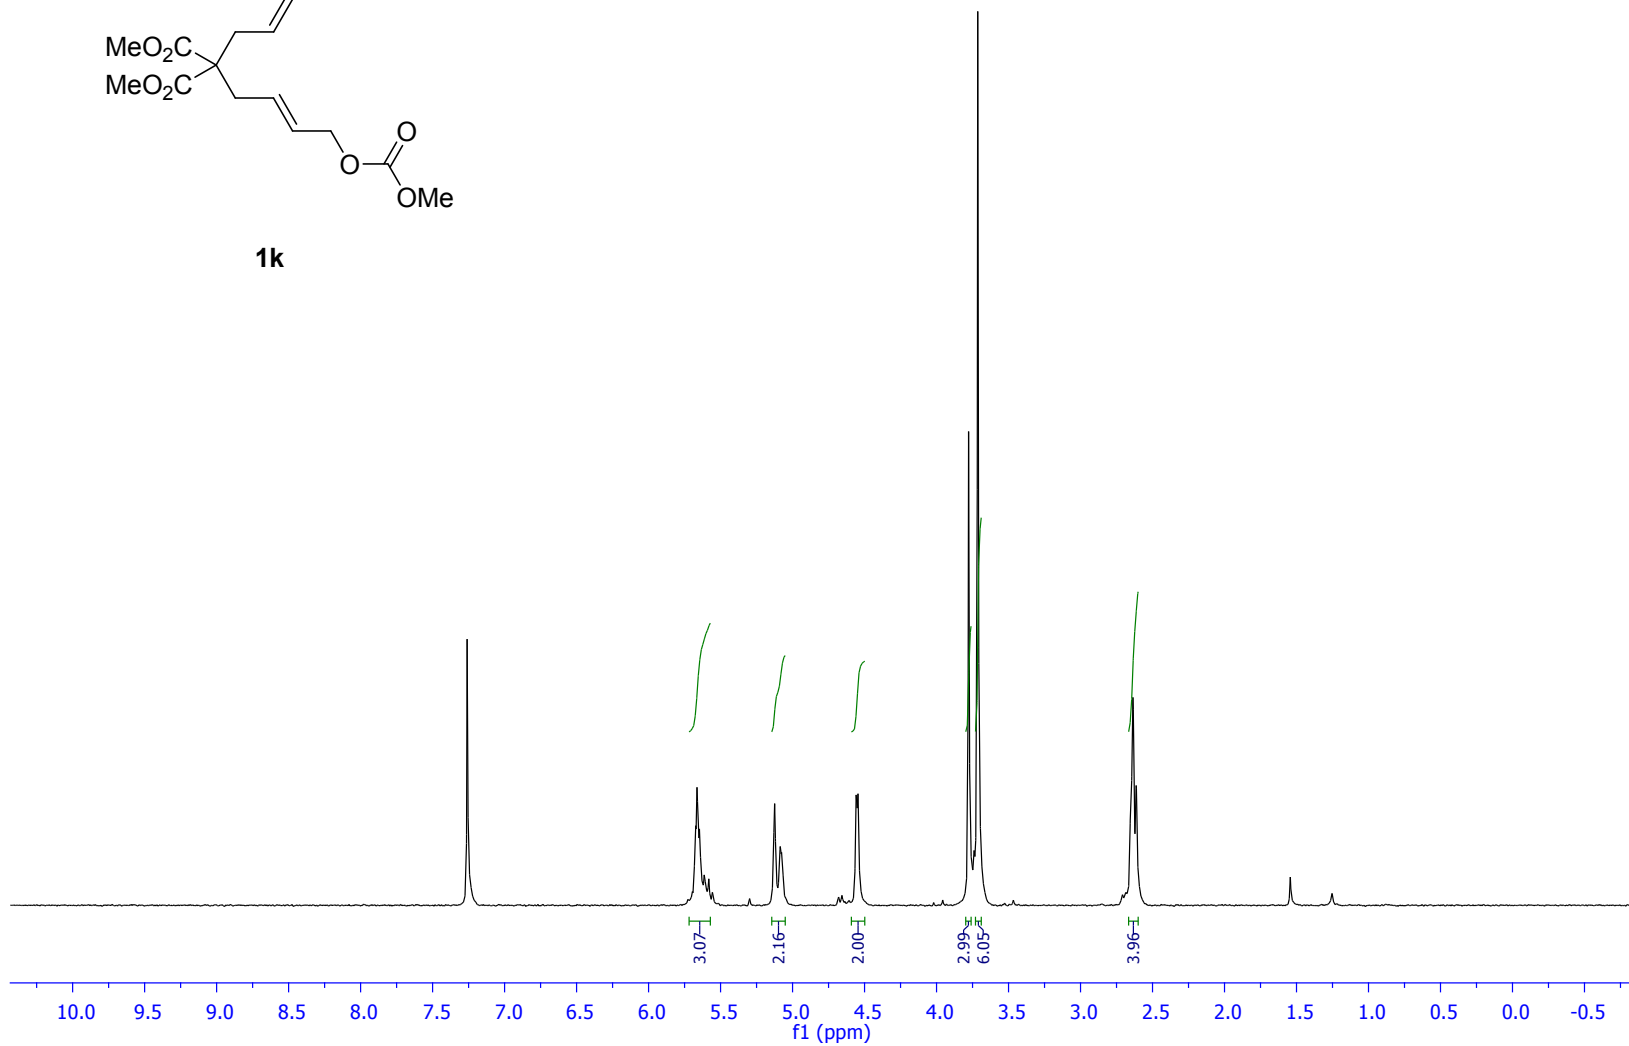

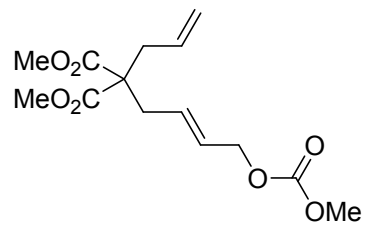

**1k**

— 171.01

— 155.60

— 132.15

— 130.19

— 128.08

— 119.45

— 67.92

— 57.64

— 54.81

— 52.48

— 37.21

— 35.58

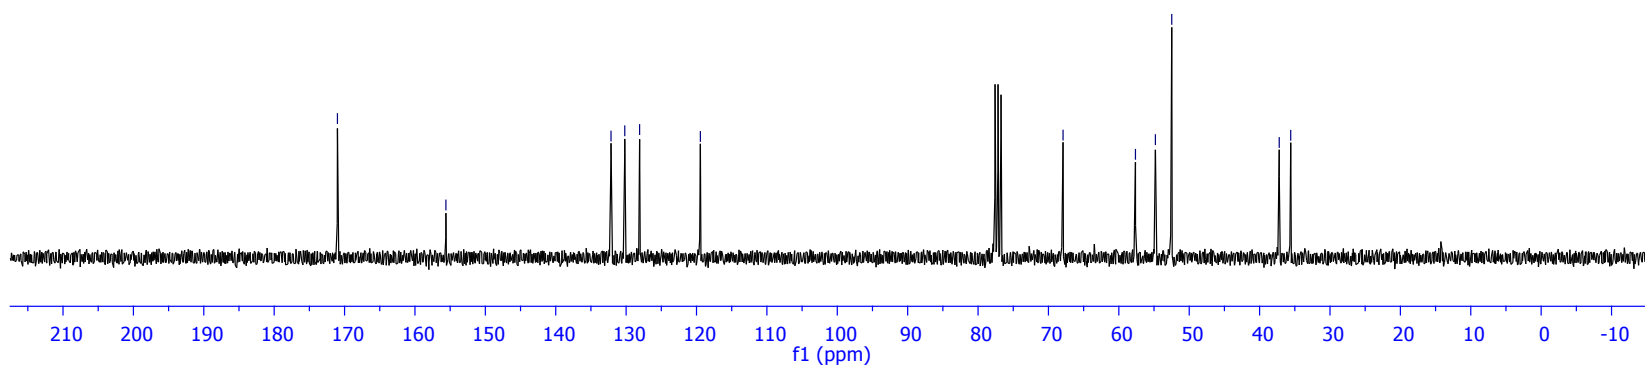

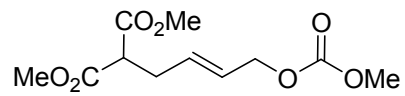

11

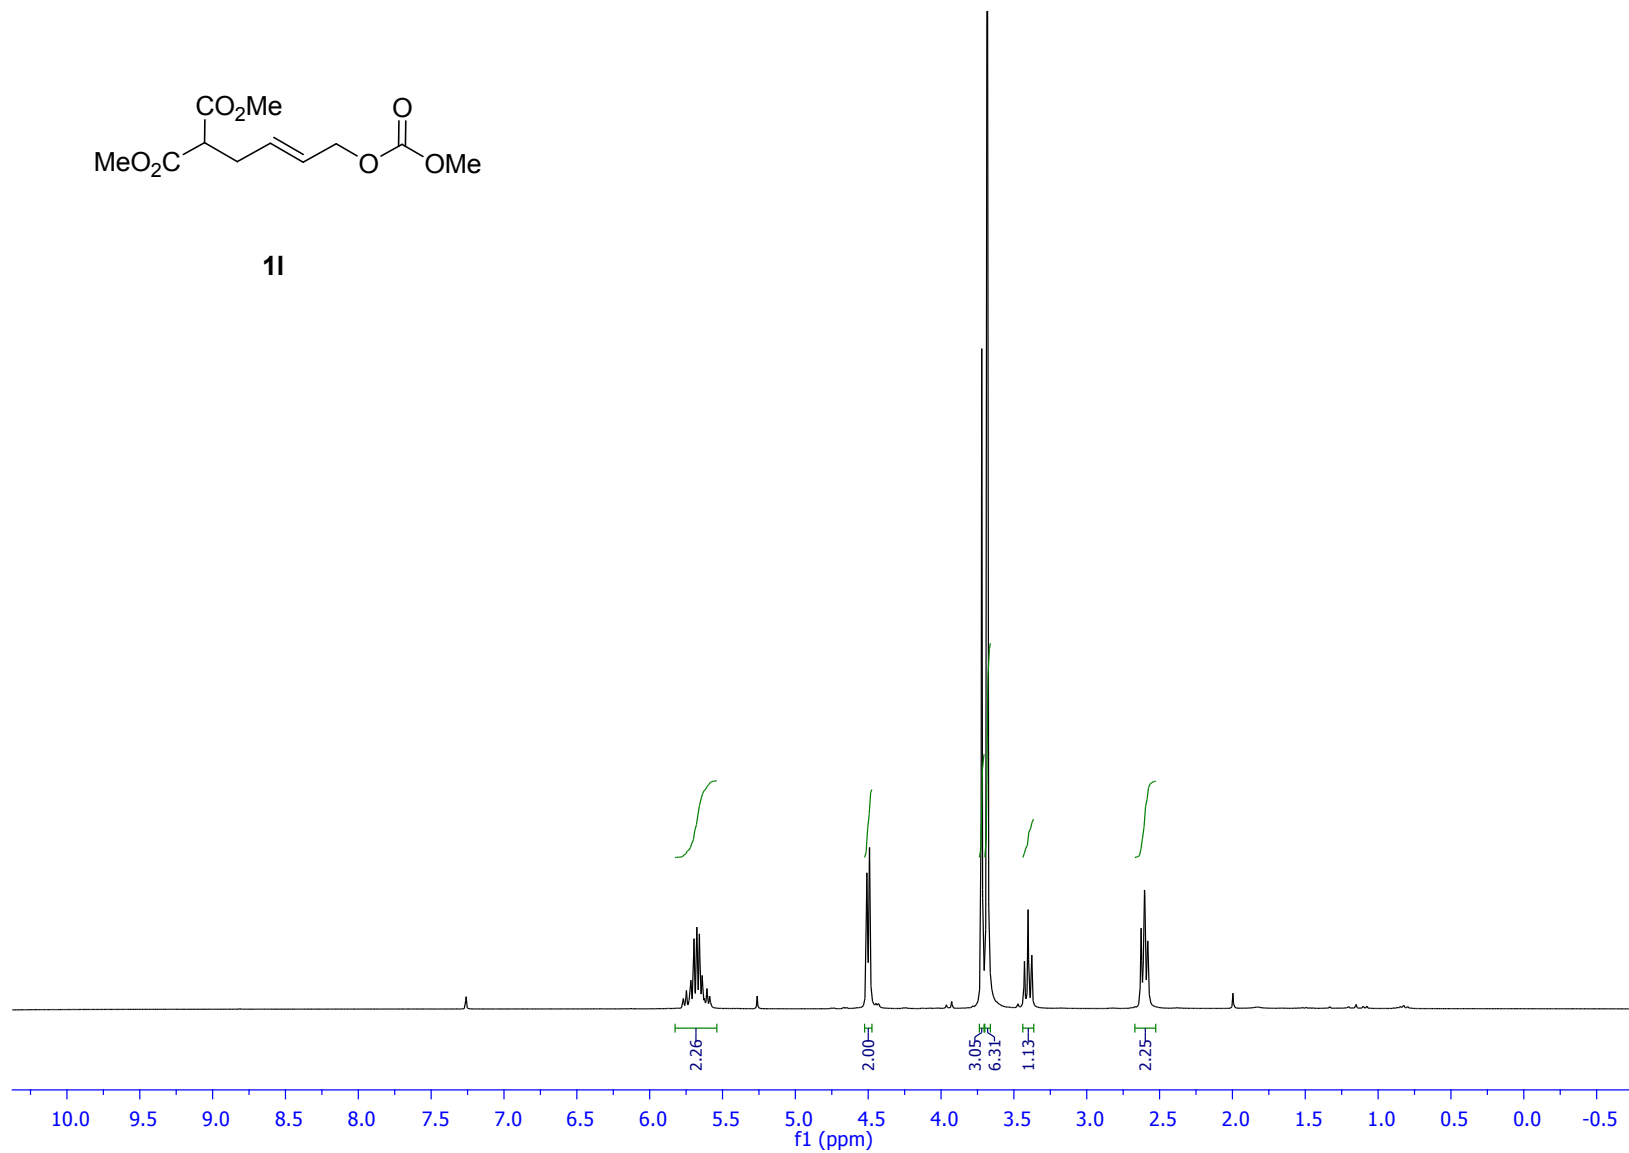

S54

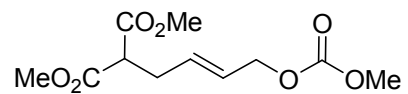

11

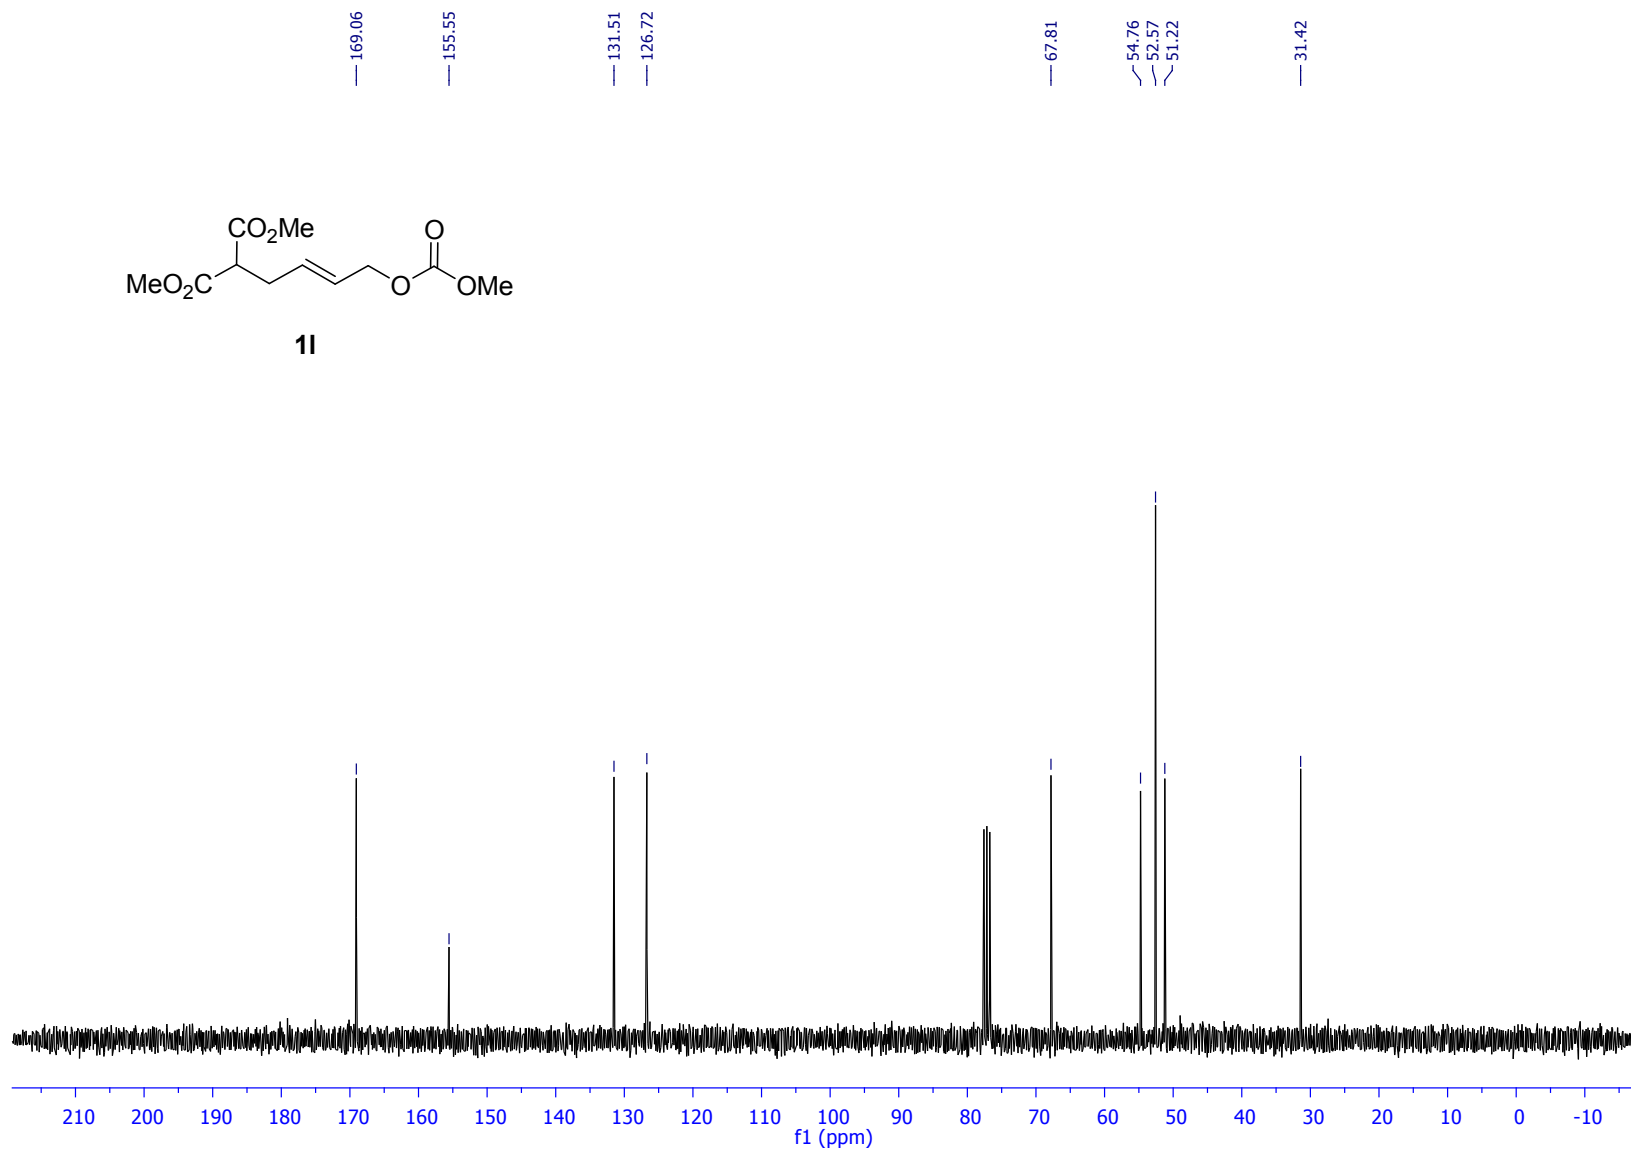

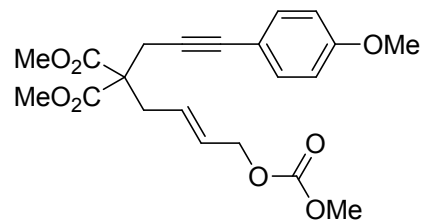

1m

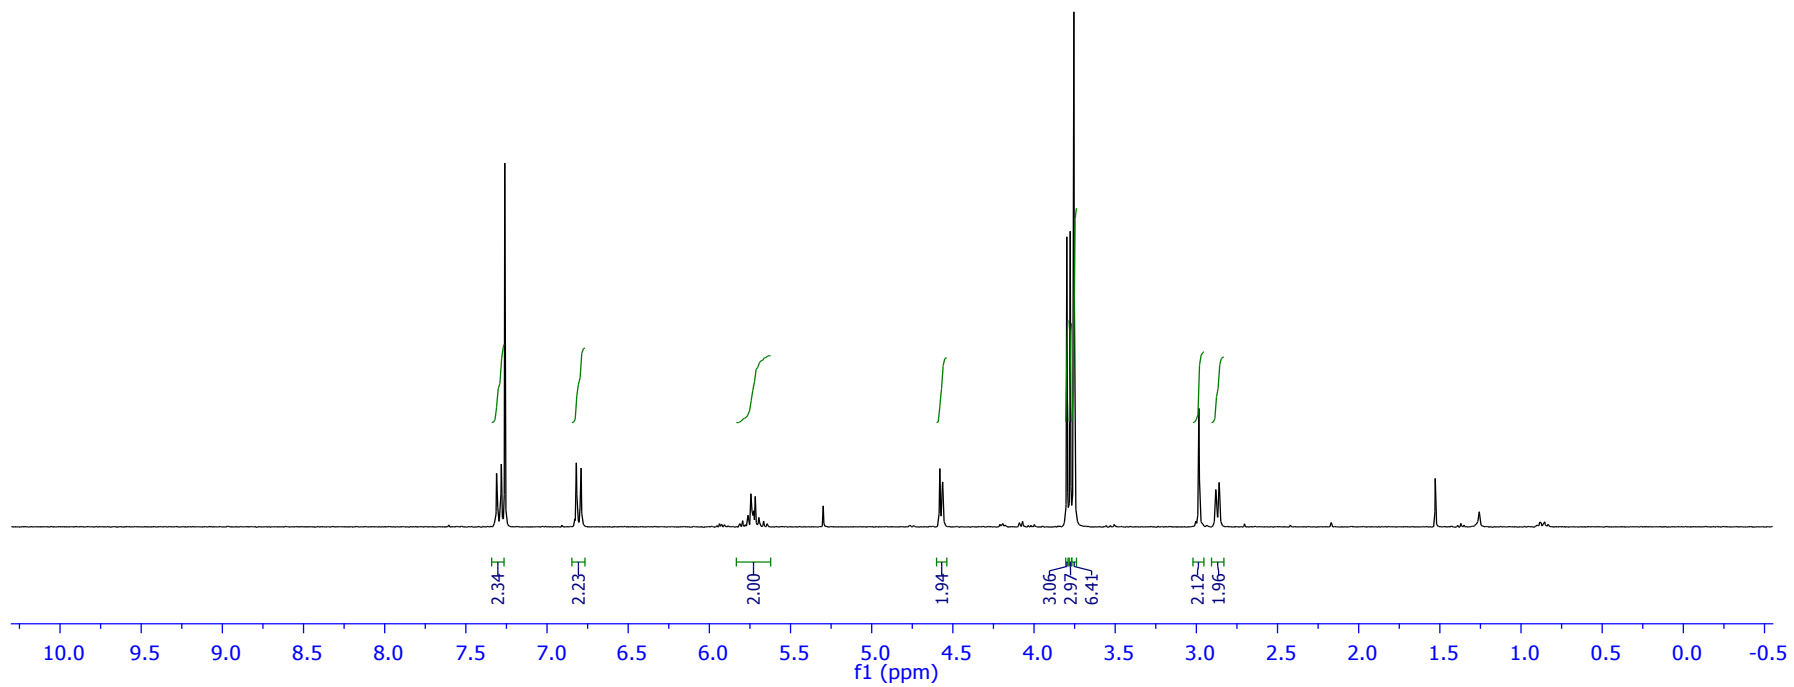



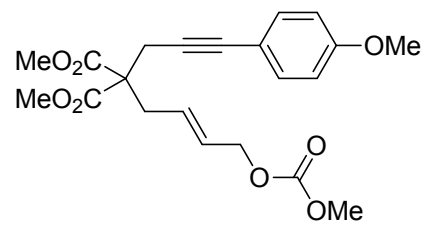

1m

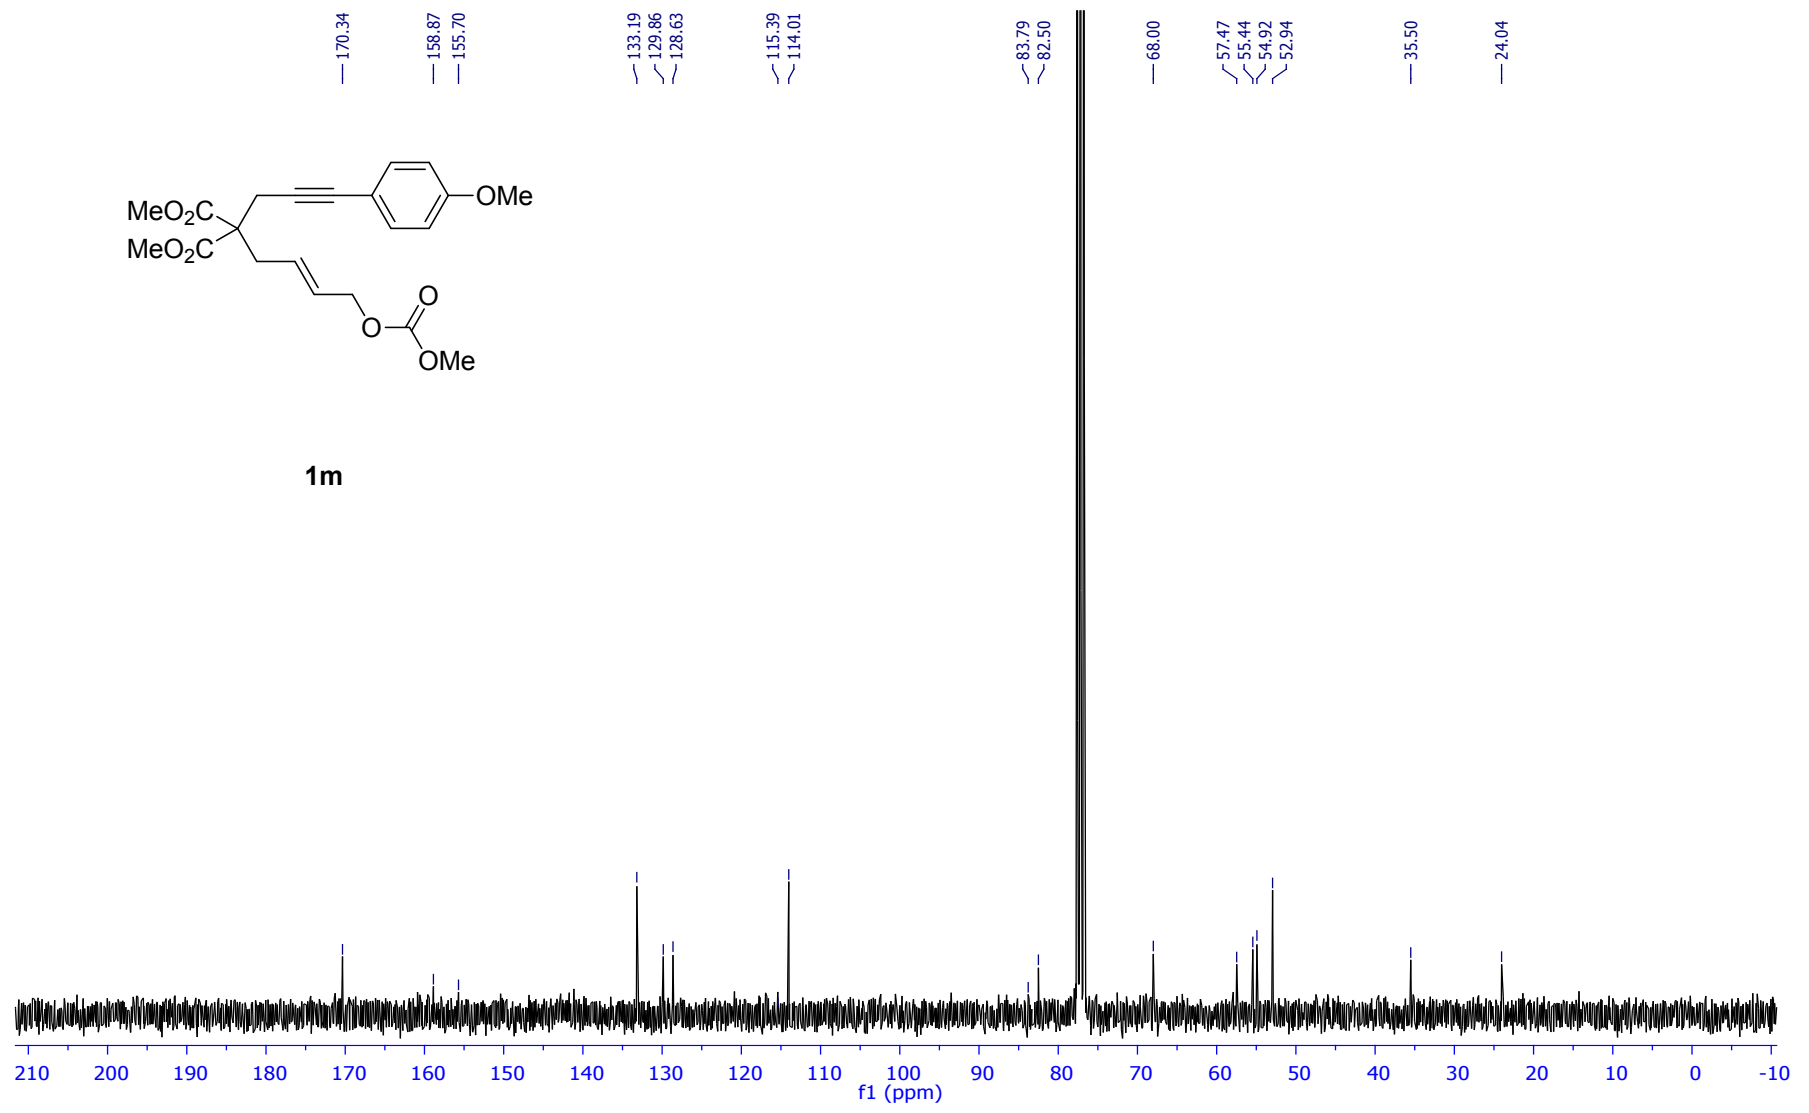

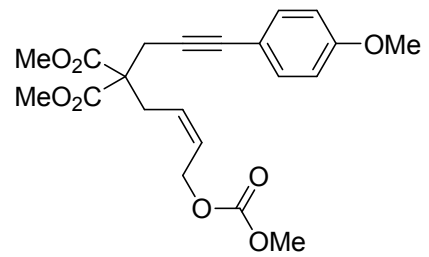

**1n**

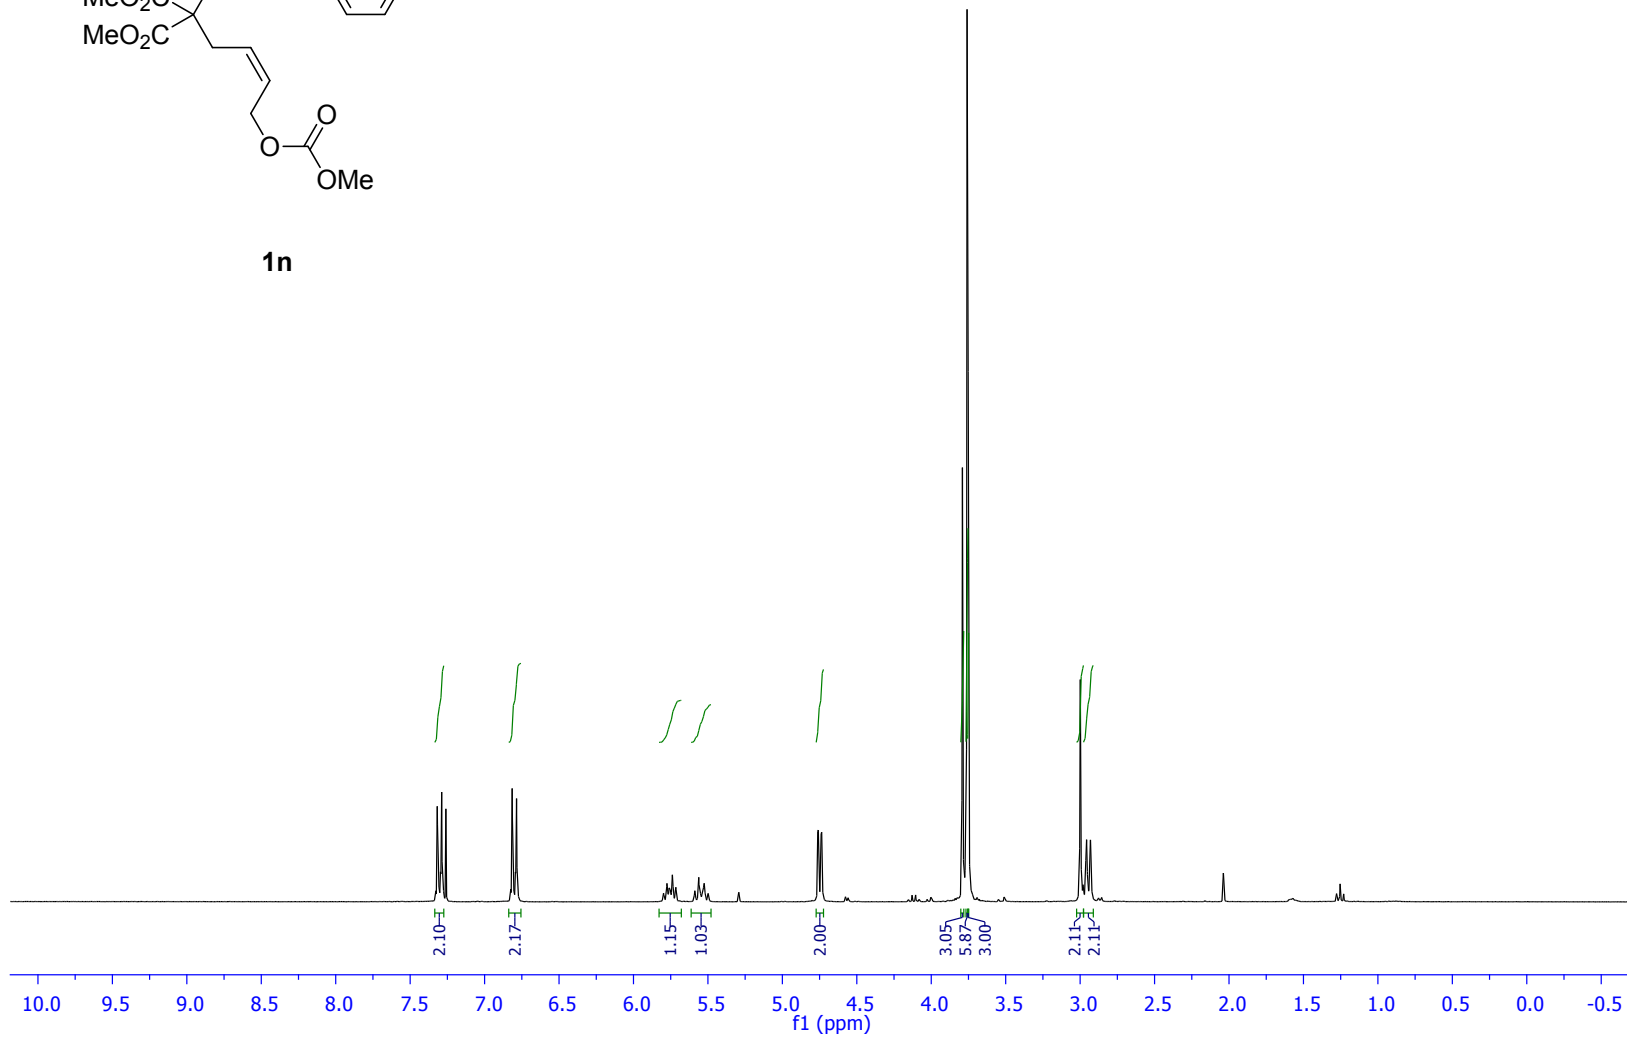

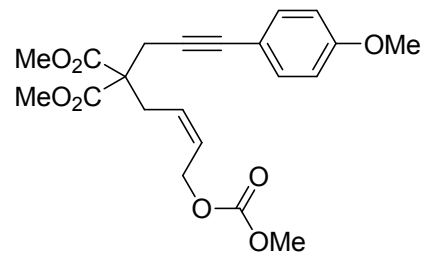

1n

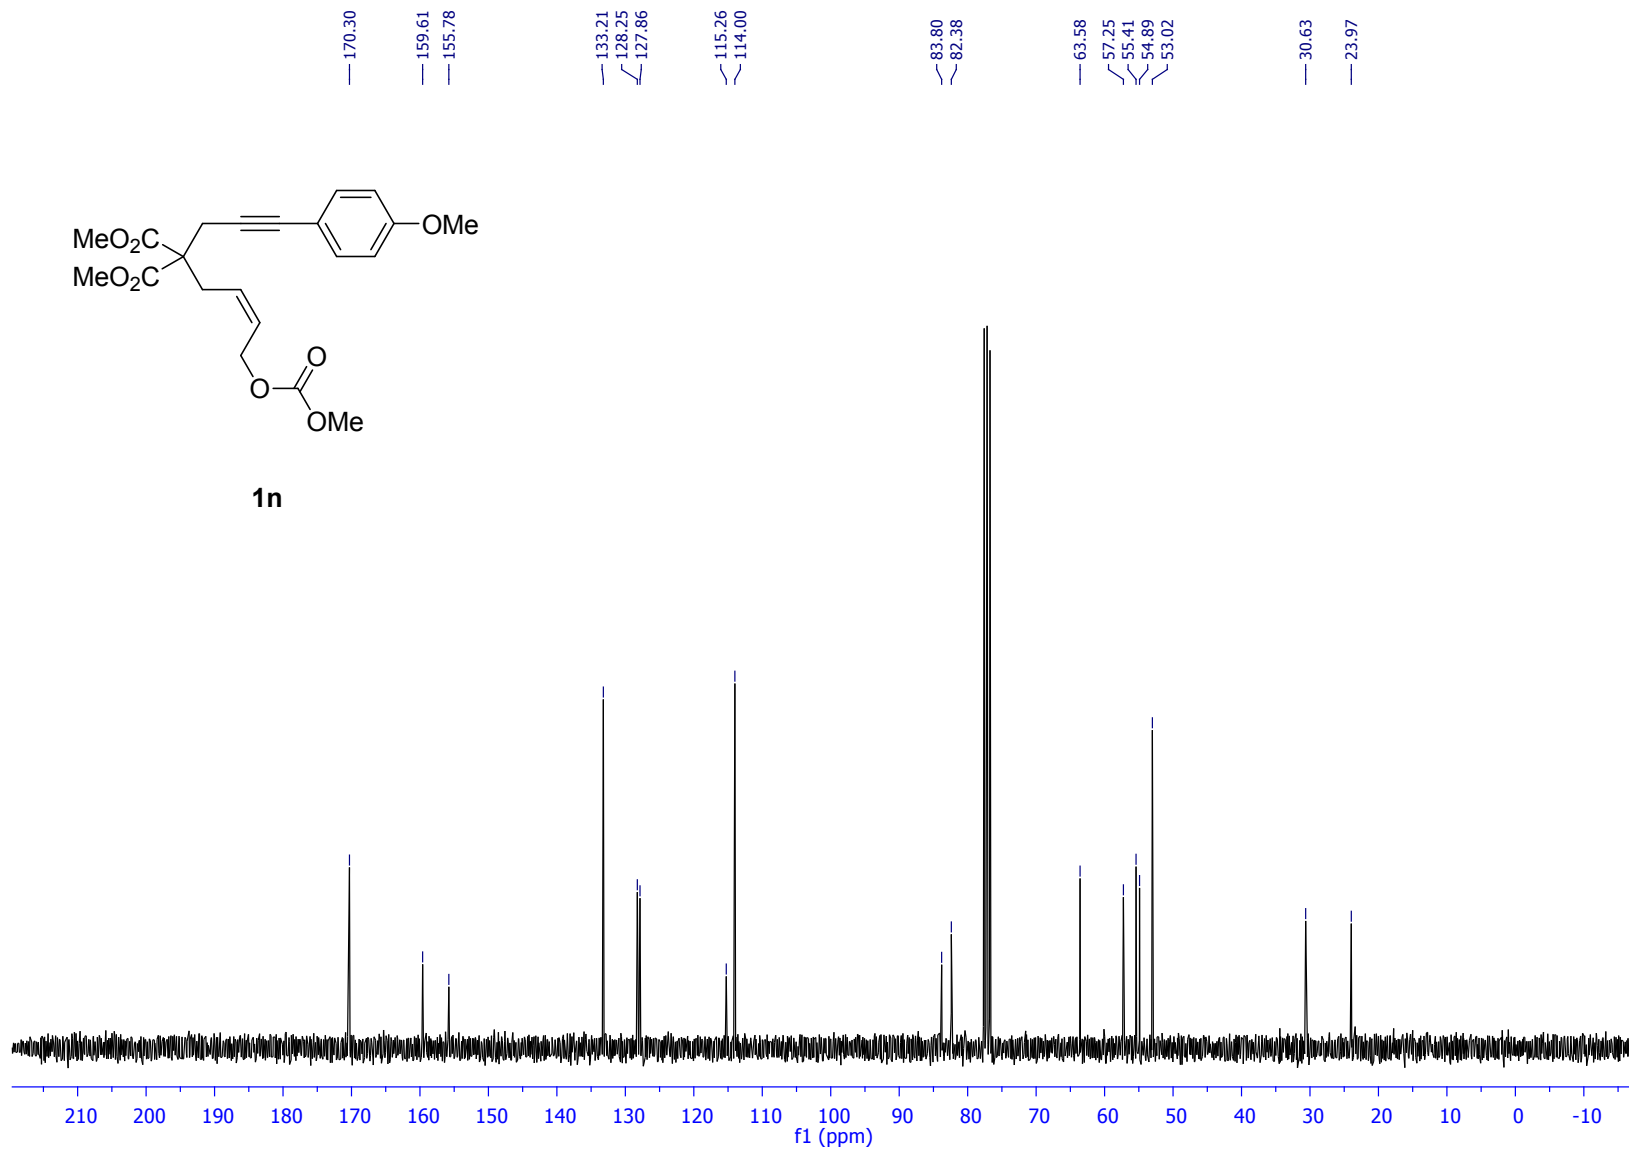

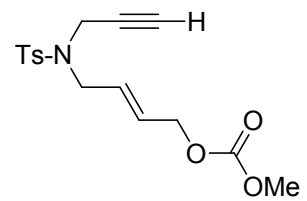

**1o**

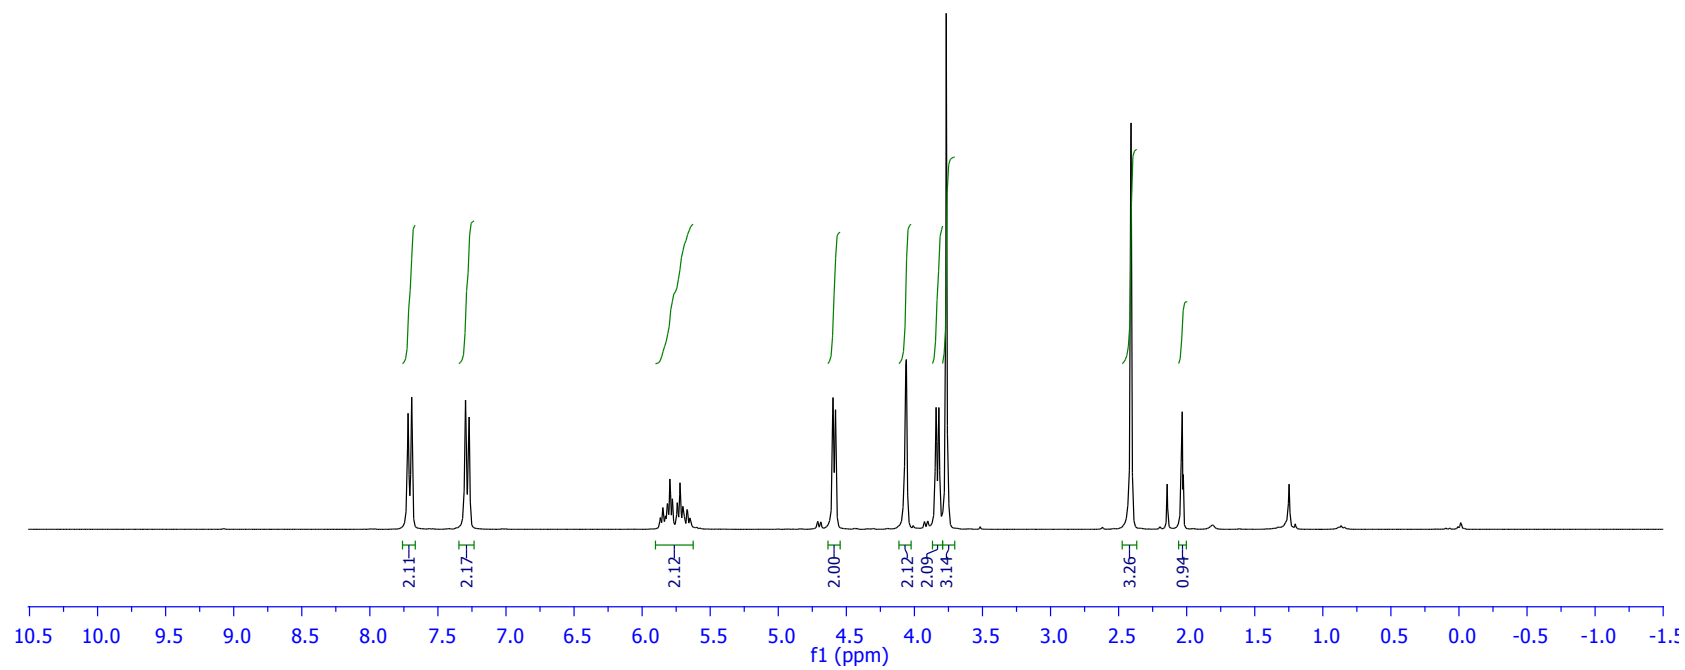

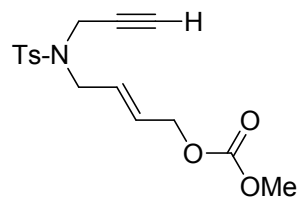

**1o**

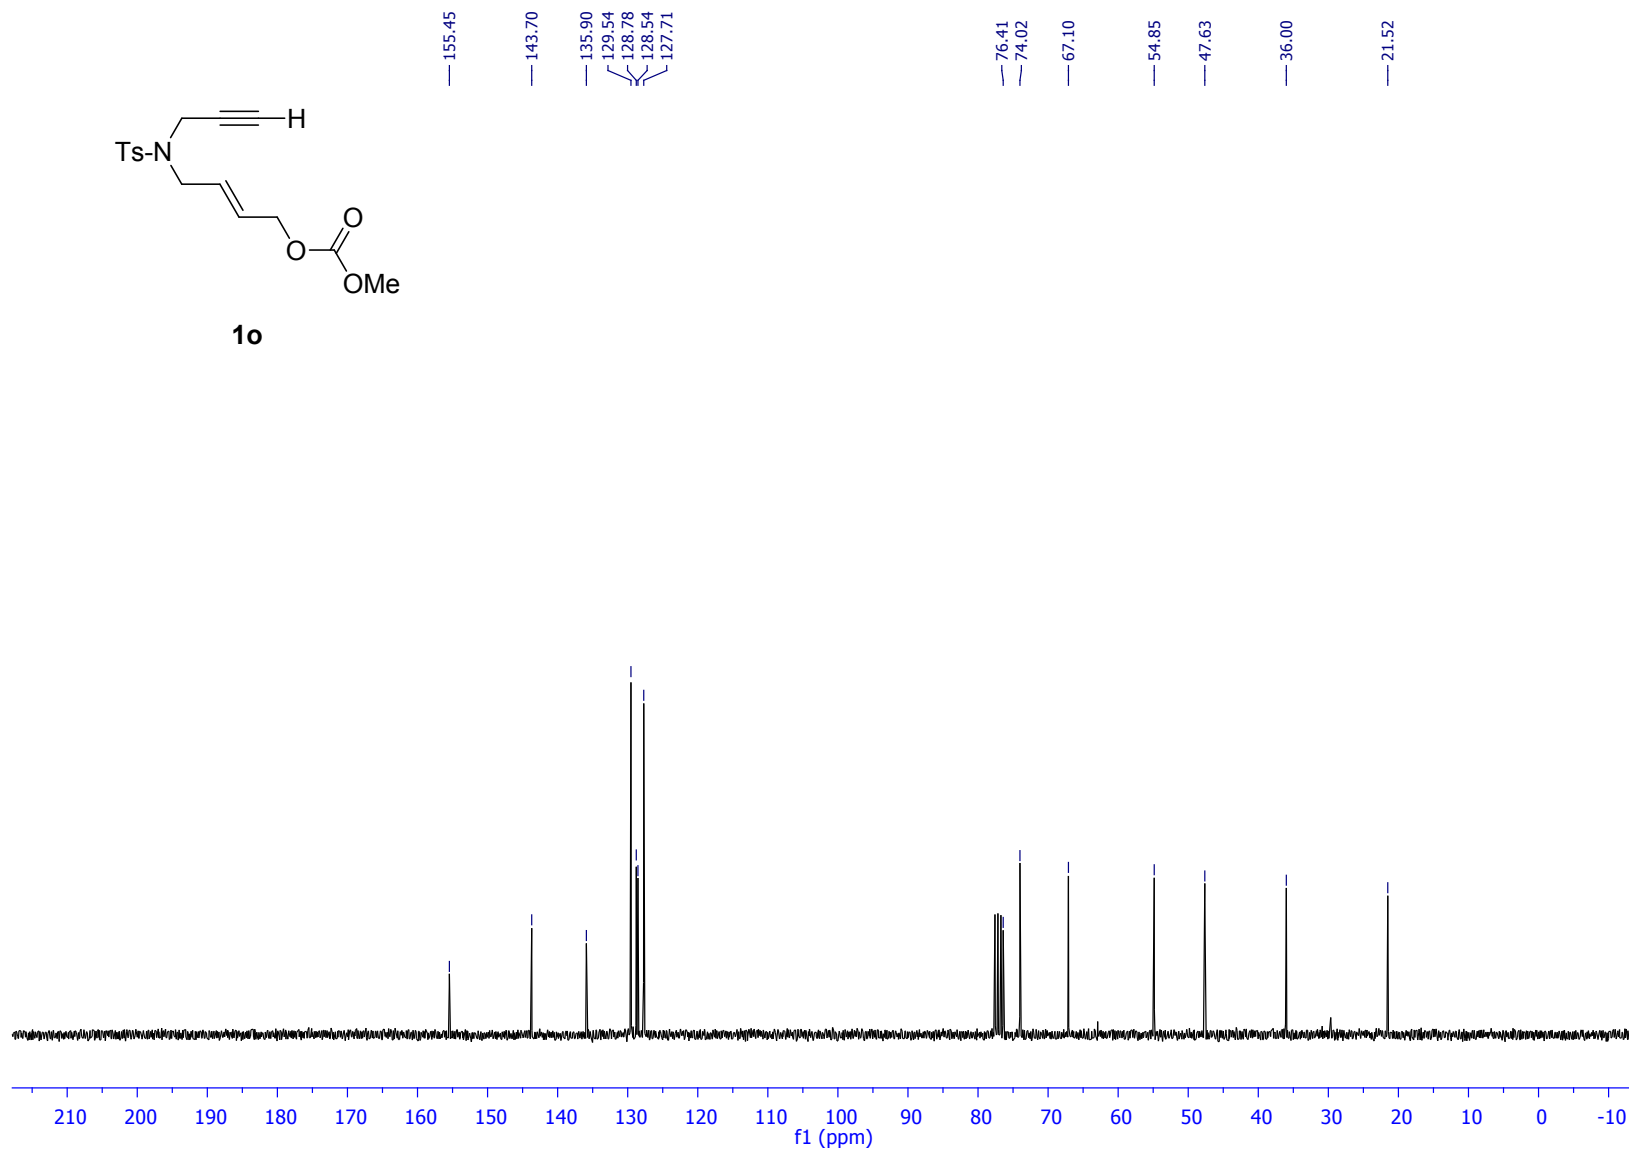

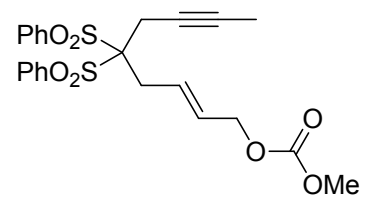

1p

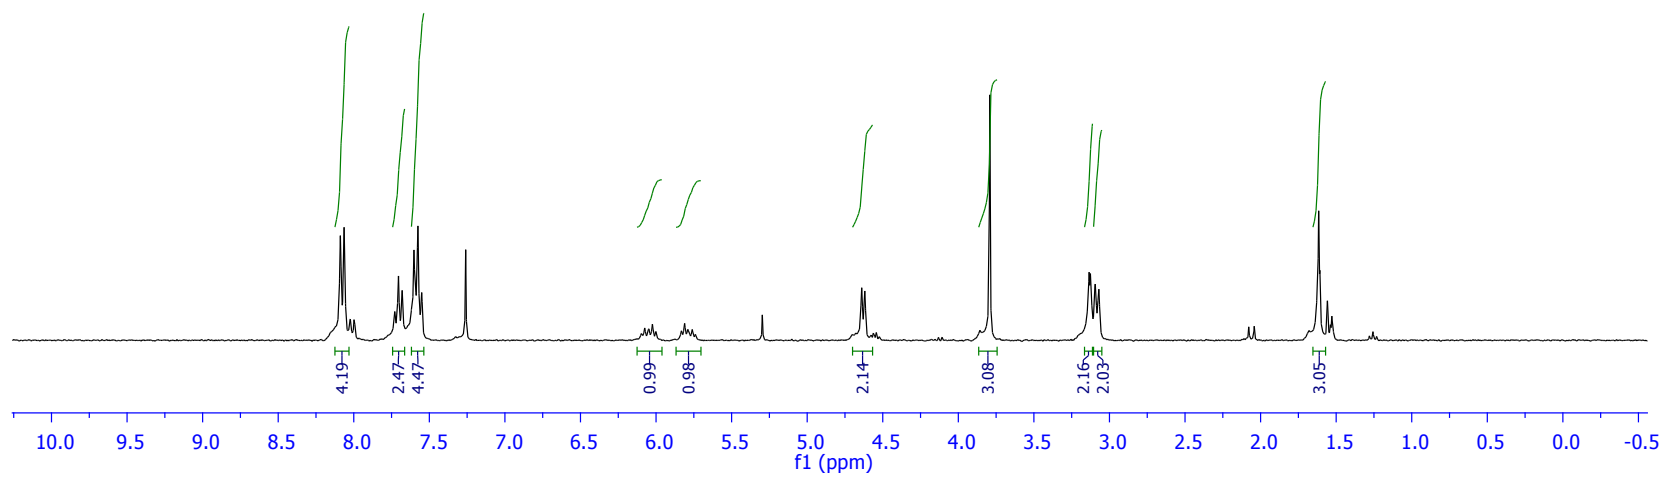

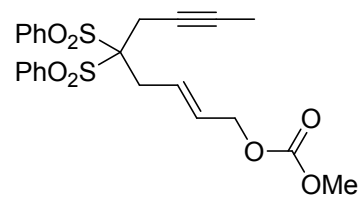

1p

155.62

137.02  
134.79  
131.61  
129.71  
129.42  
129.22  
128.61  
127.57

88.95

82.18

70.65

67.83

54.89

32.53

21.43

3.65

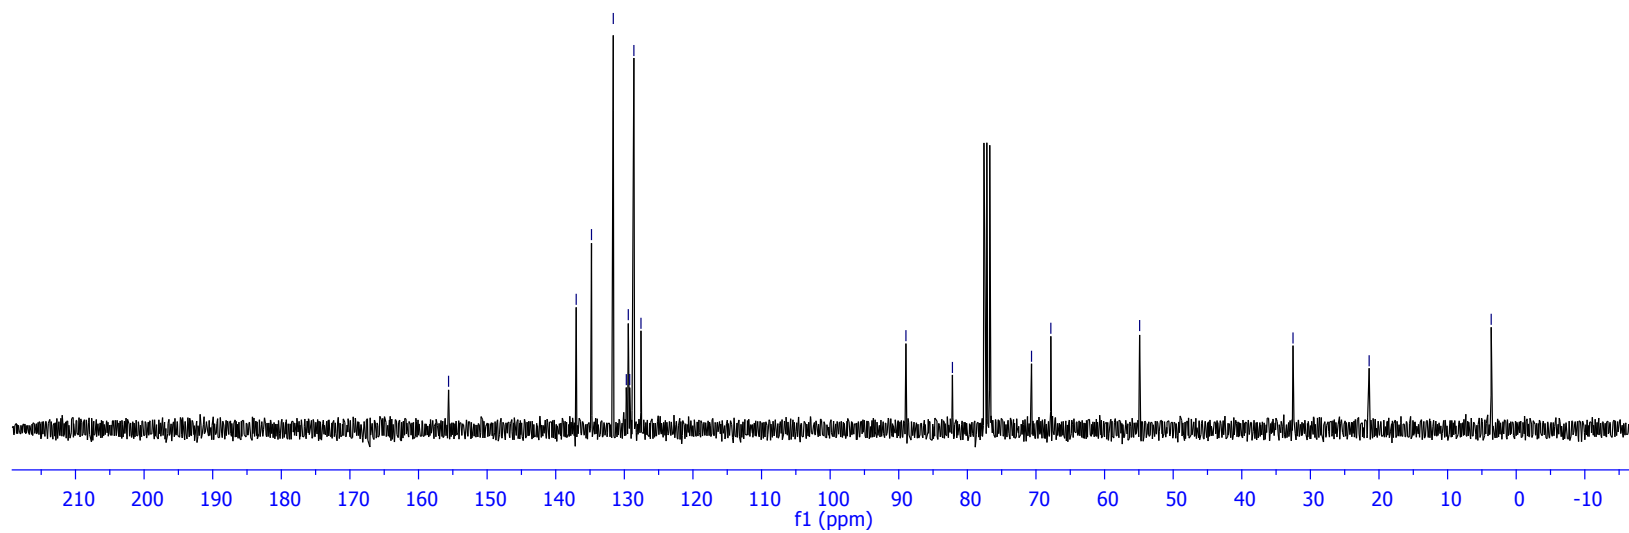

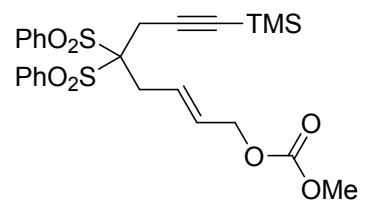

1q

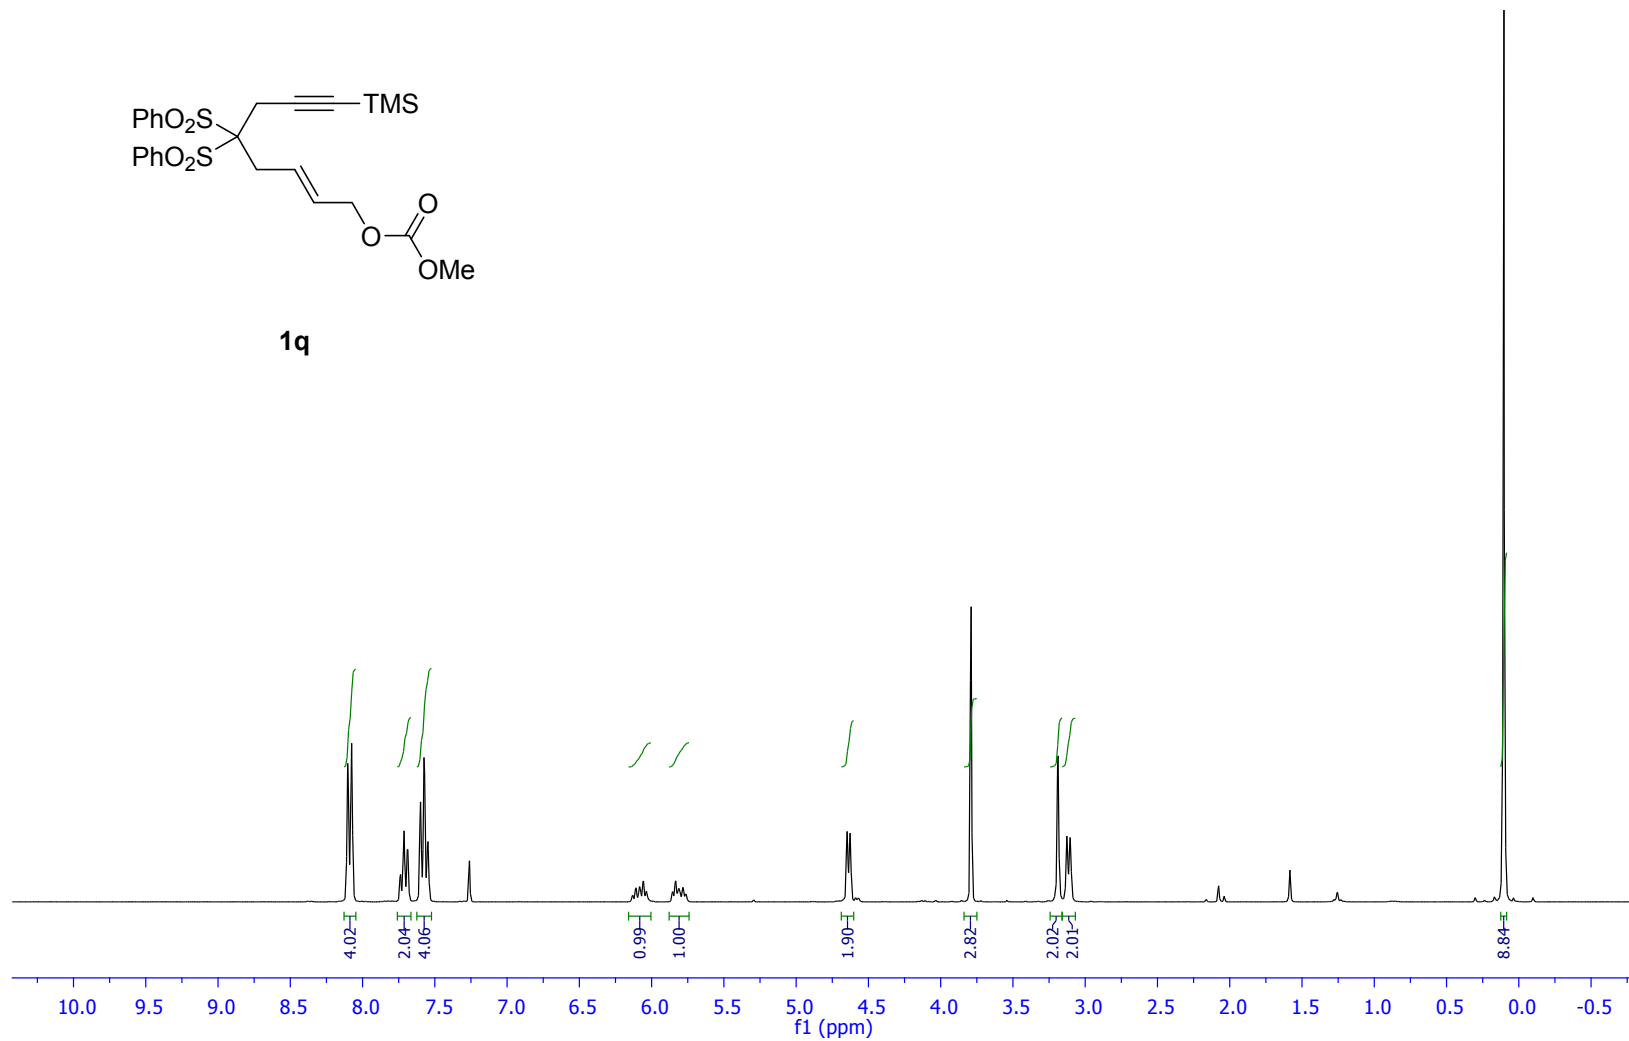



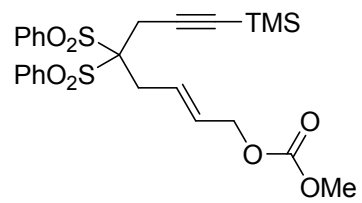

**1q**

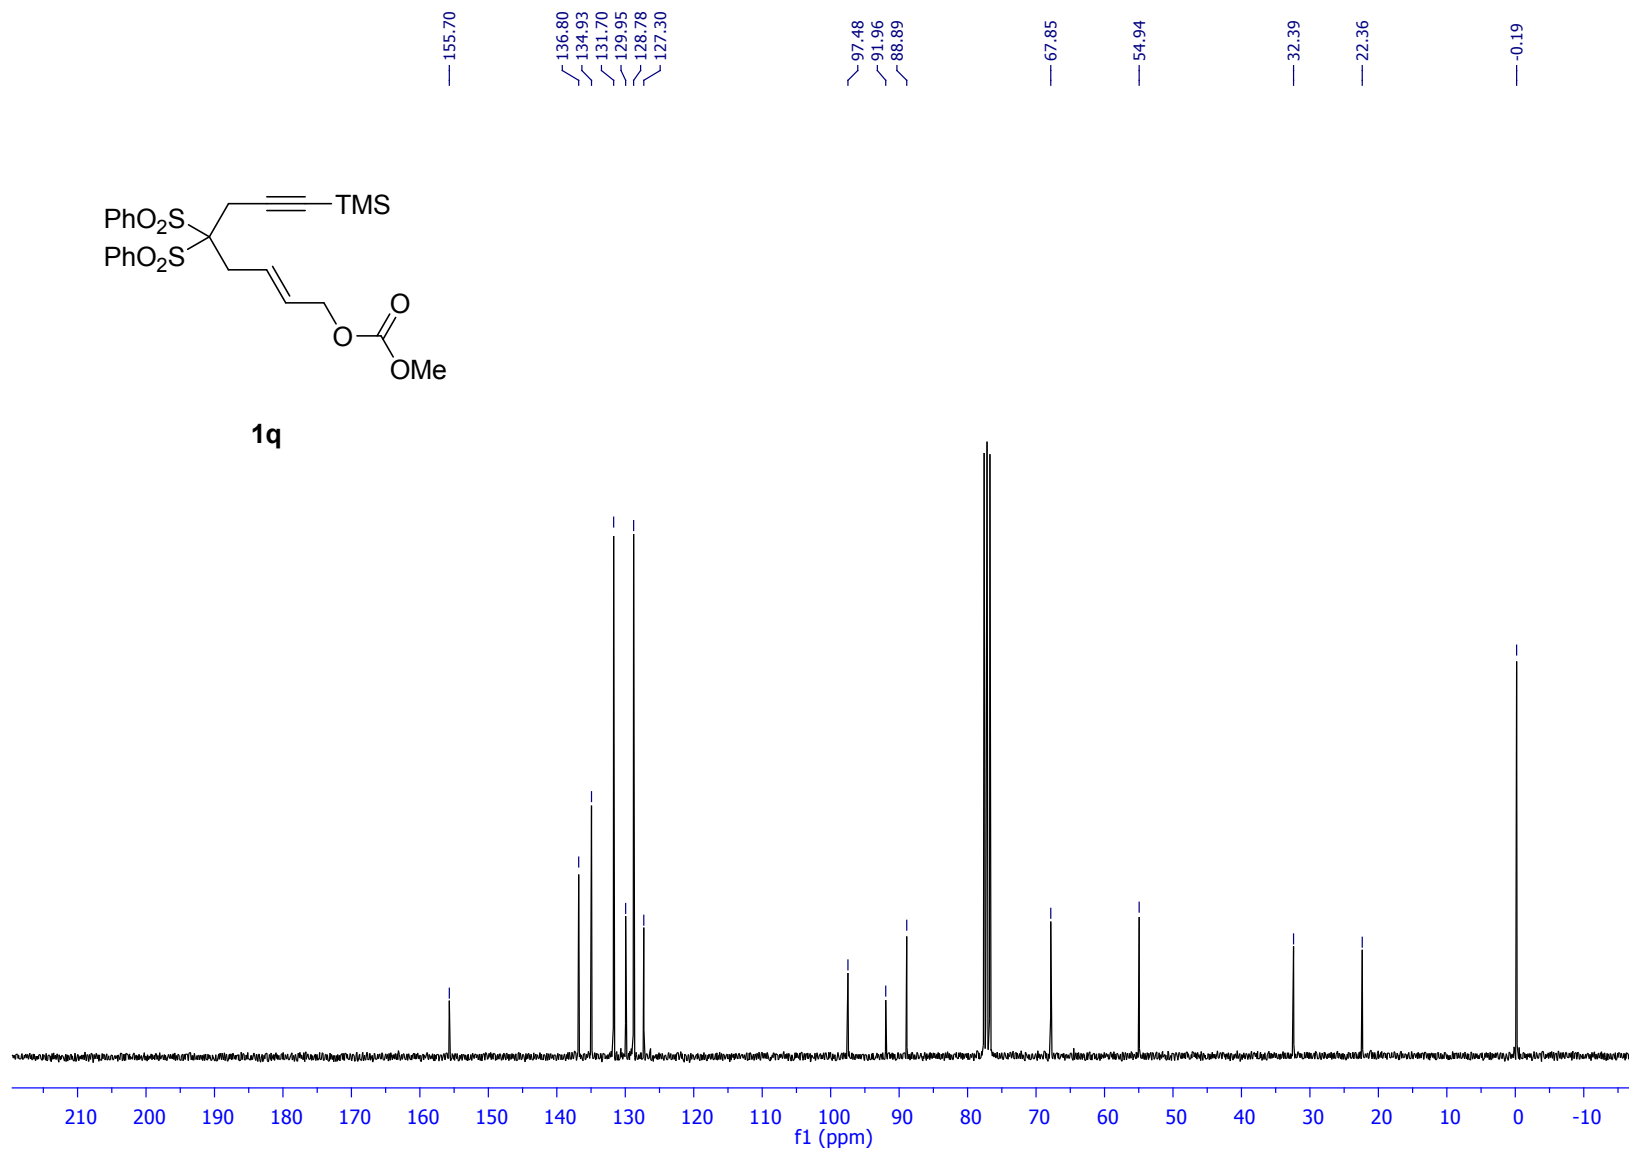

$^1\text{H-NMR}$  and  $^{13}\text{C-NMR}$  spectra of allylboronates

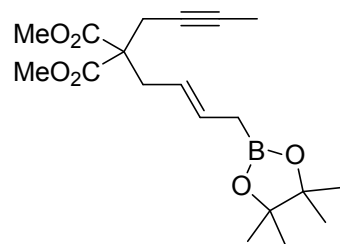

**2ab**

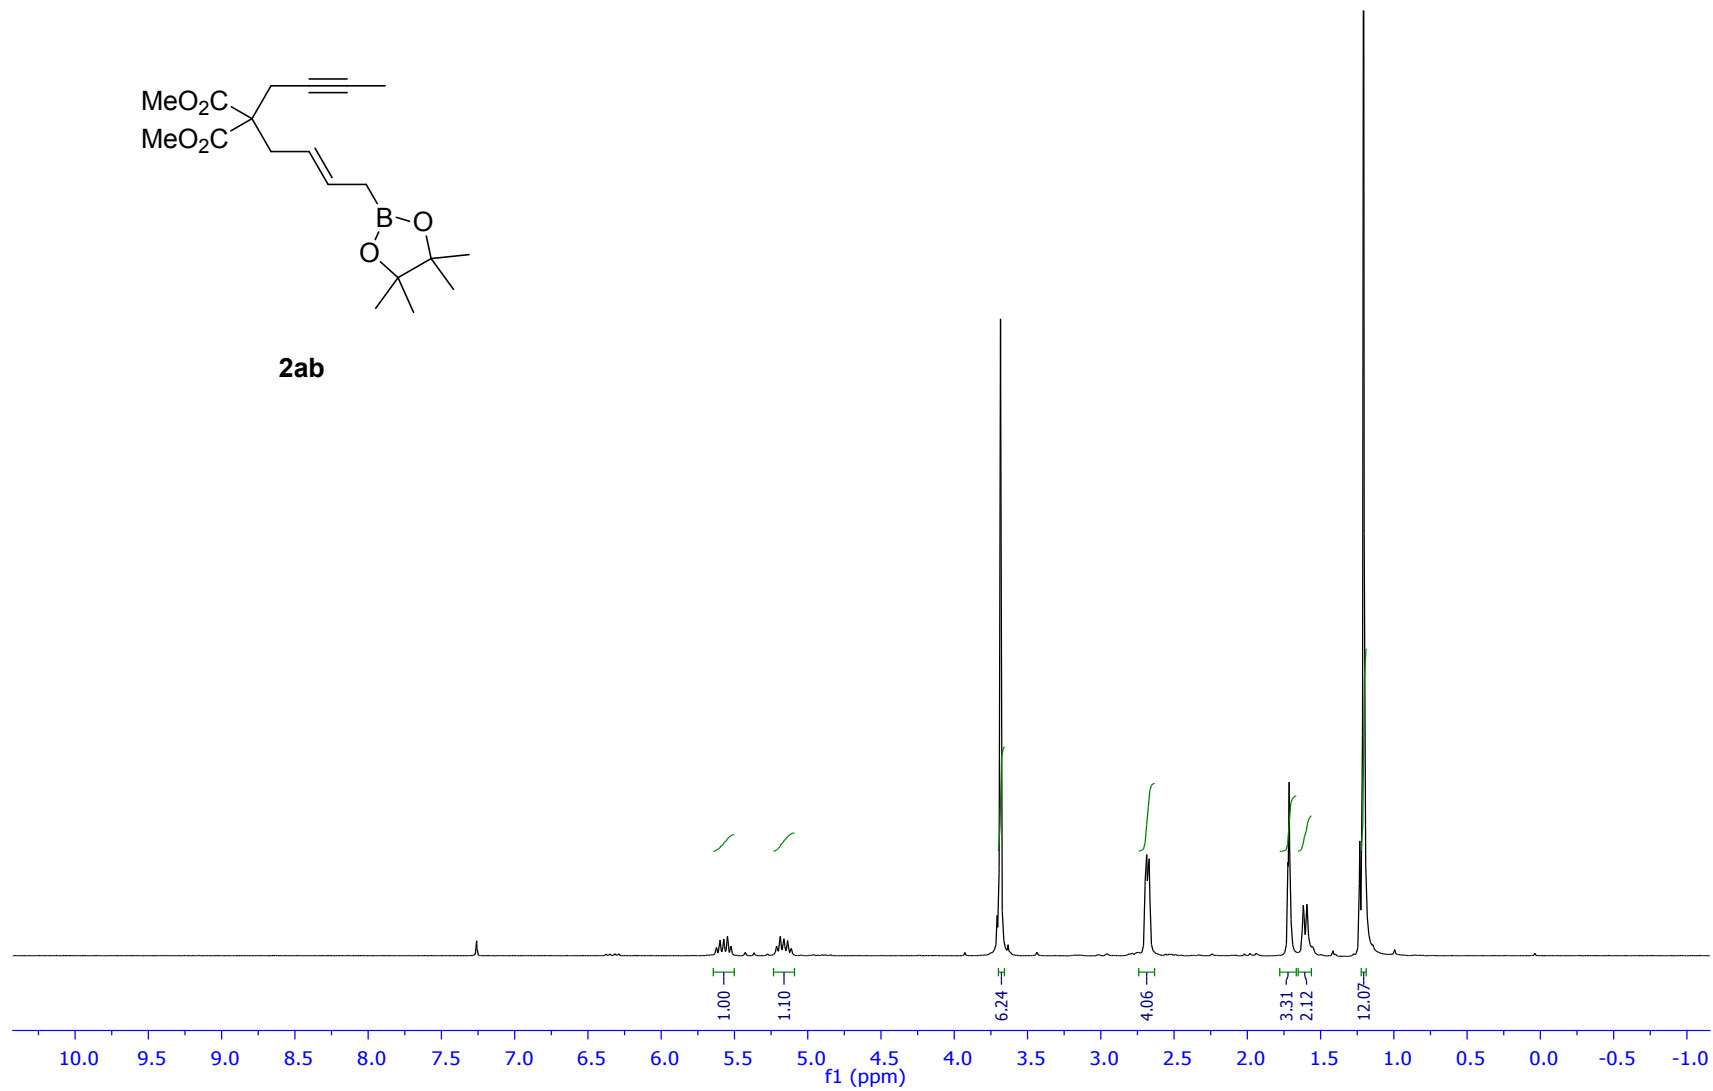

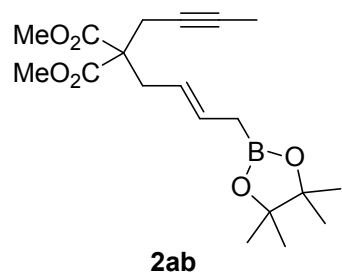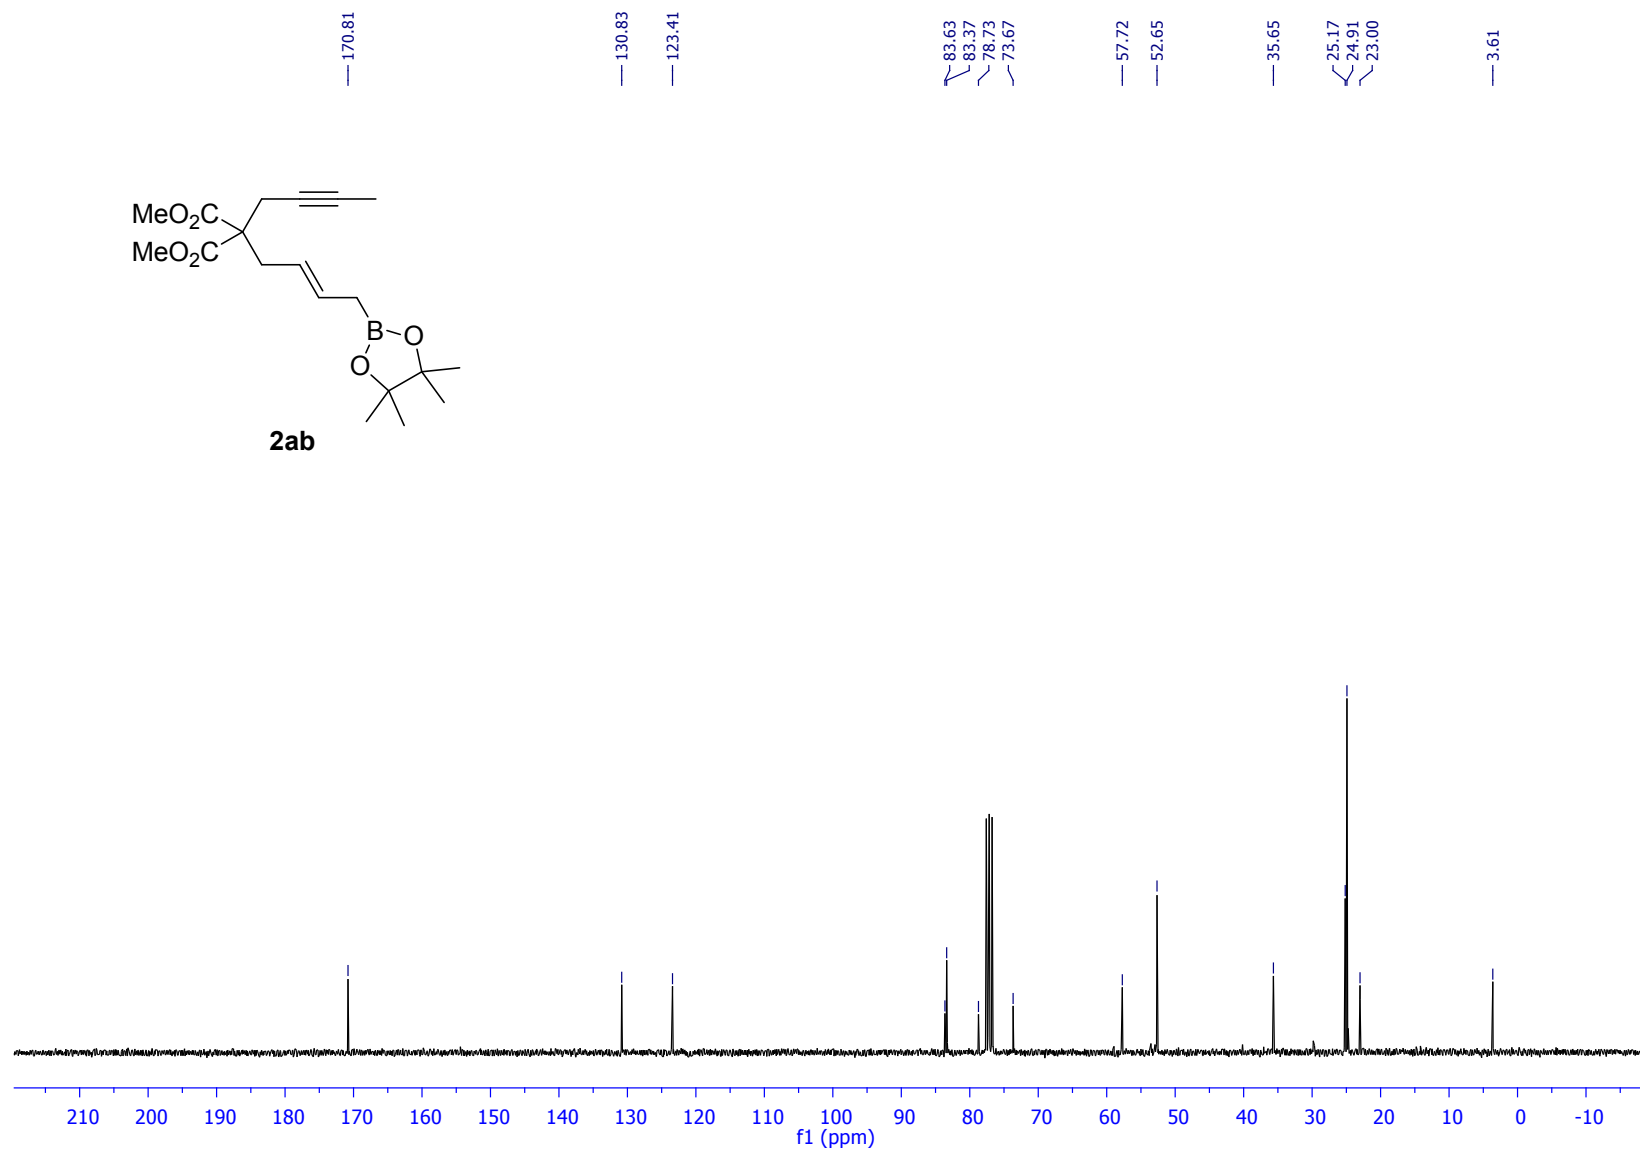

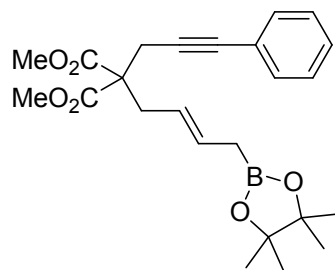

2cd

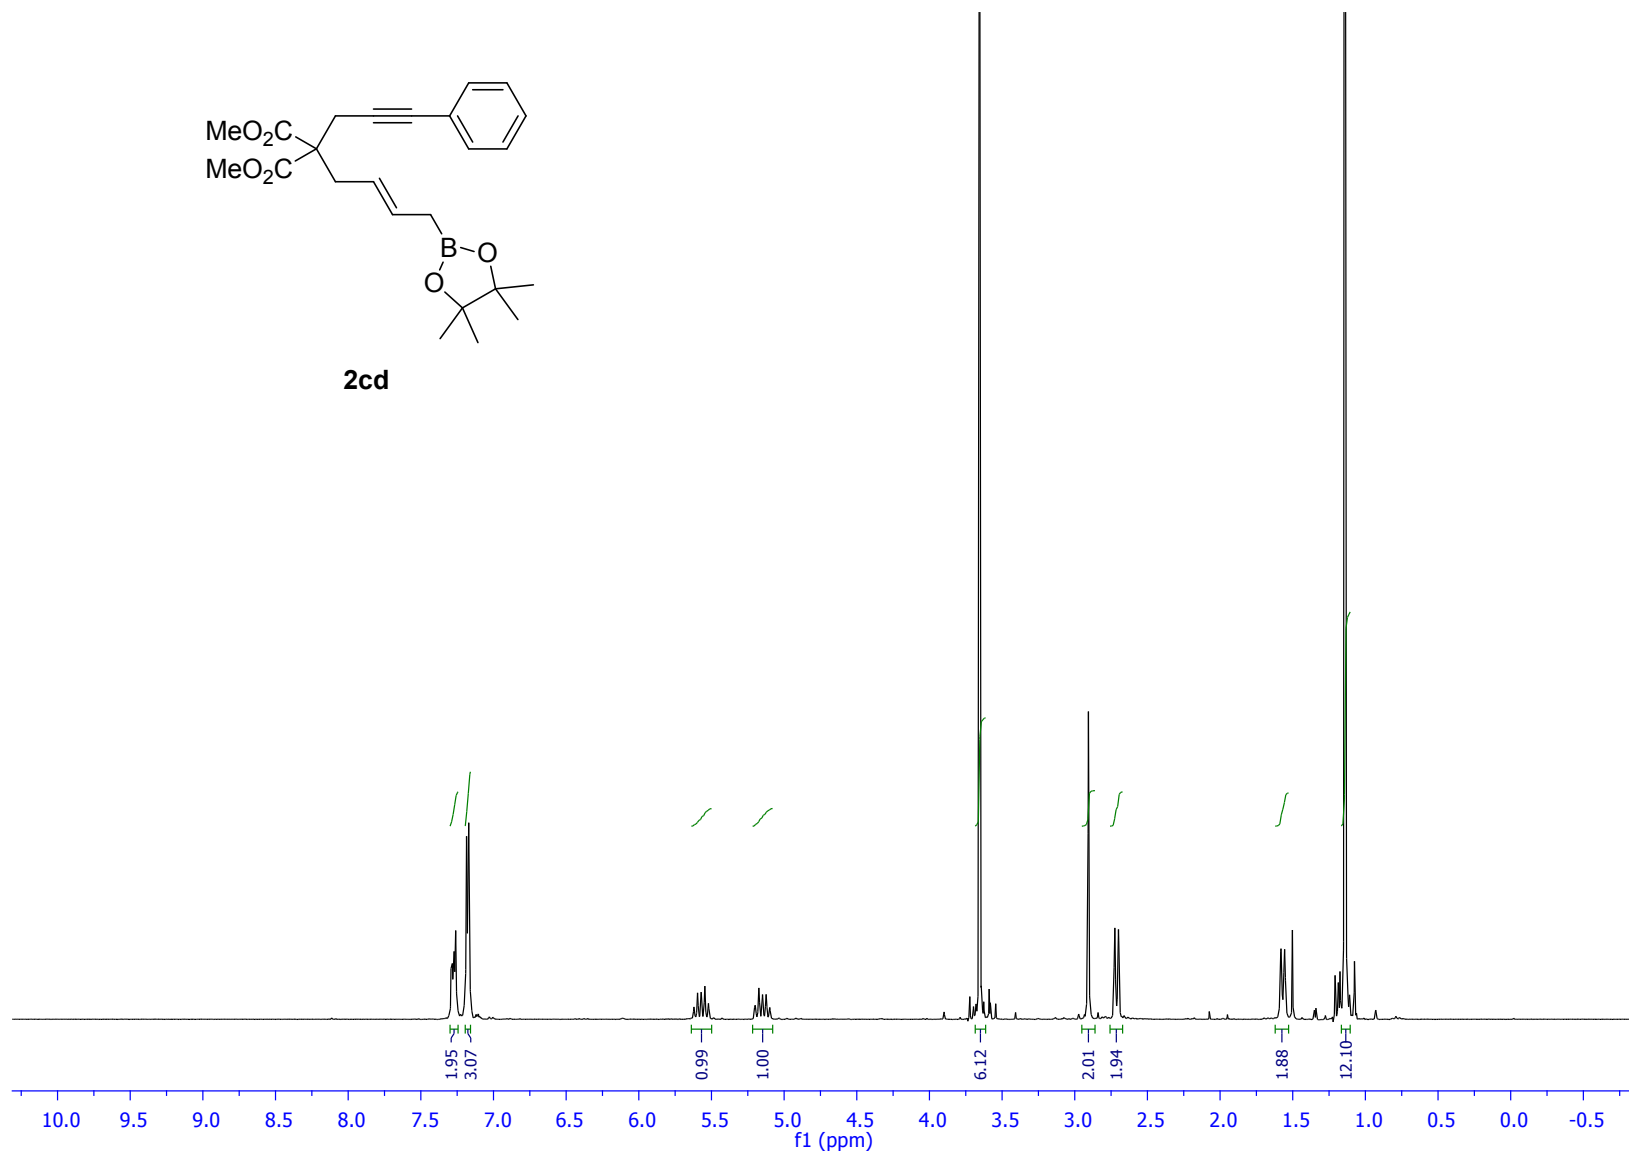

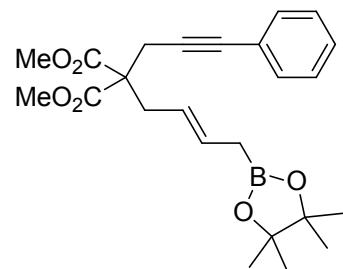

2cd

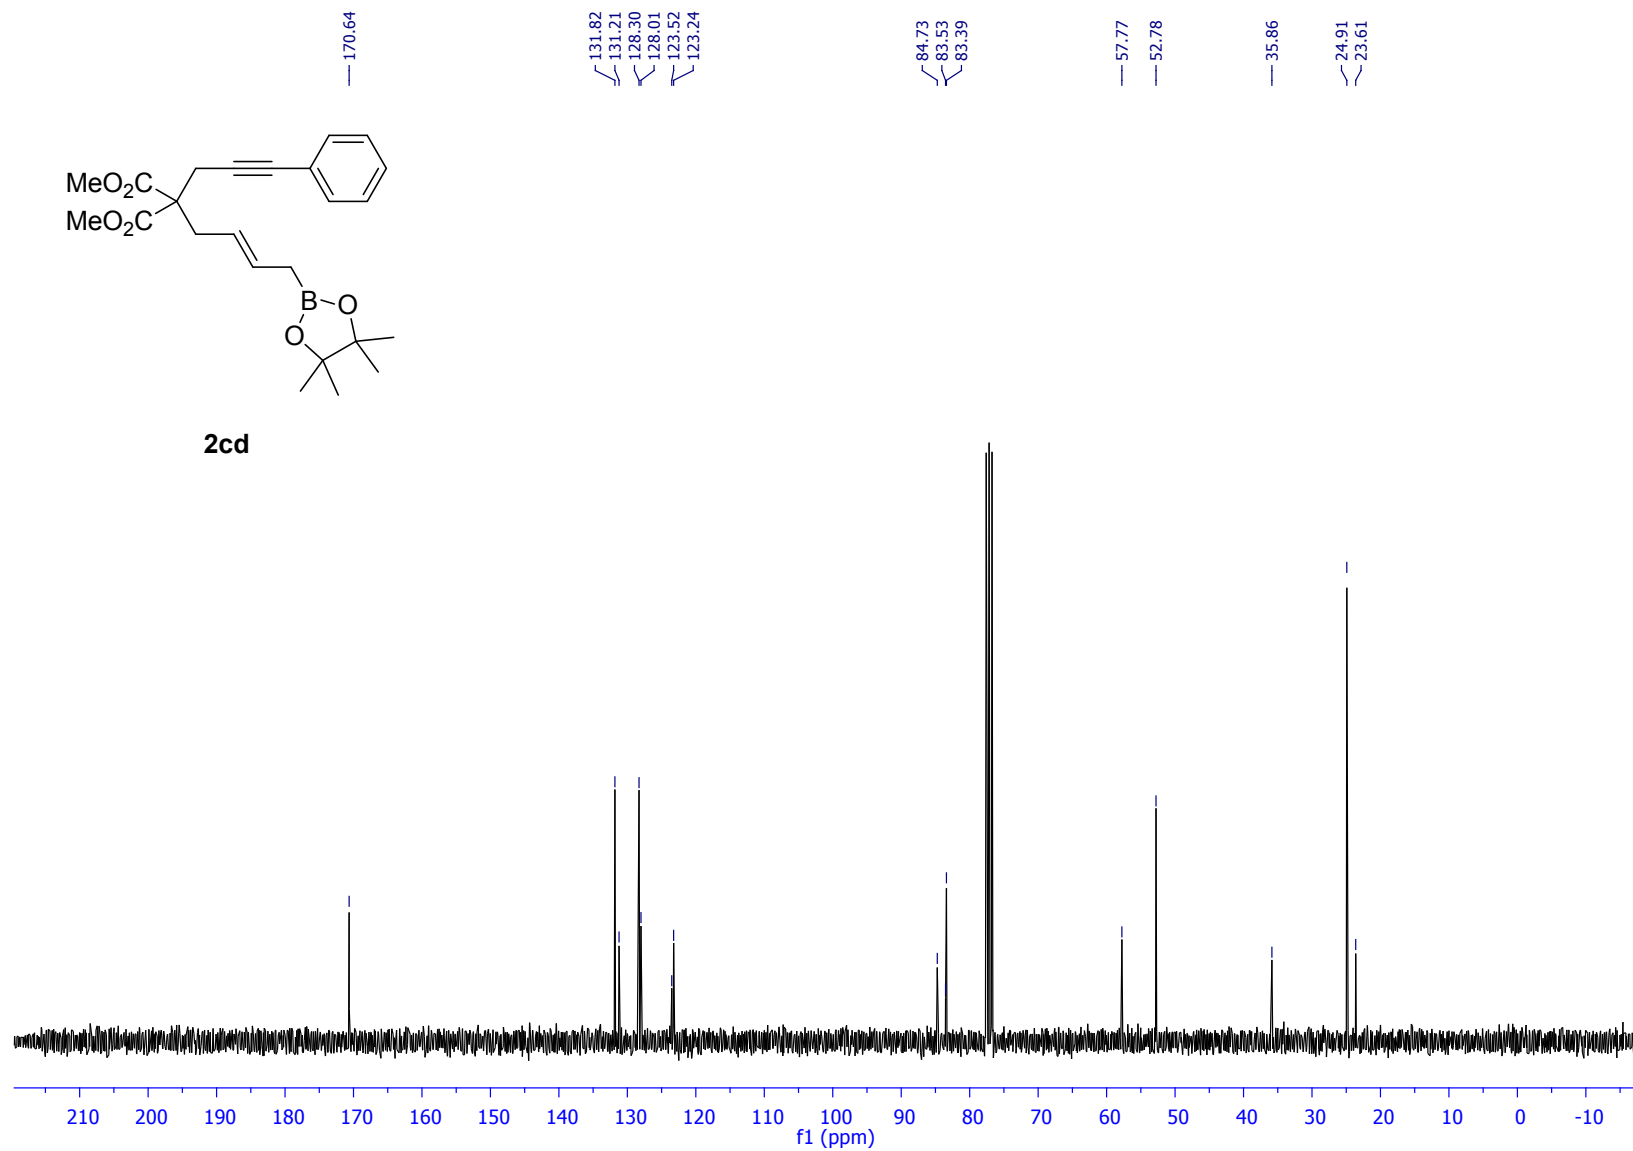

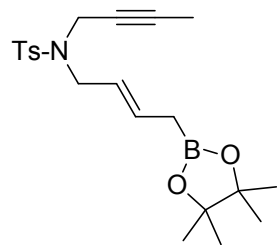

2ef

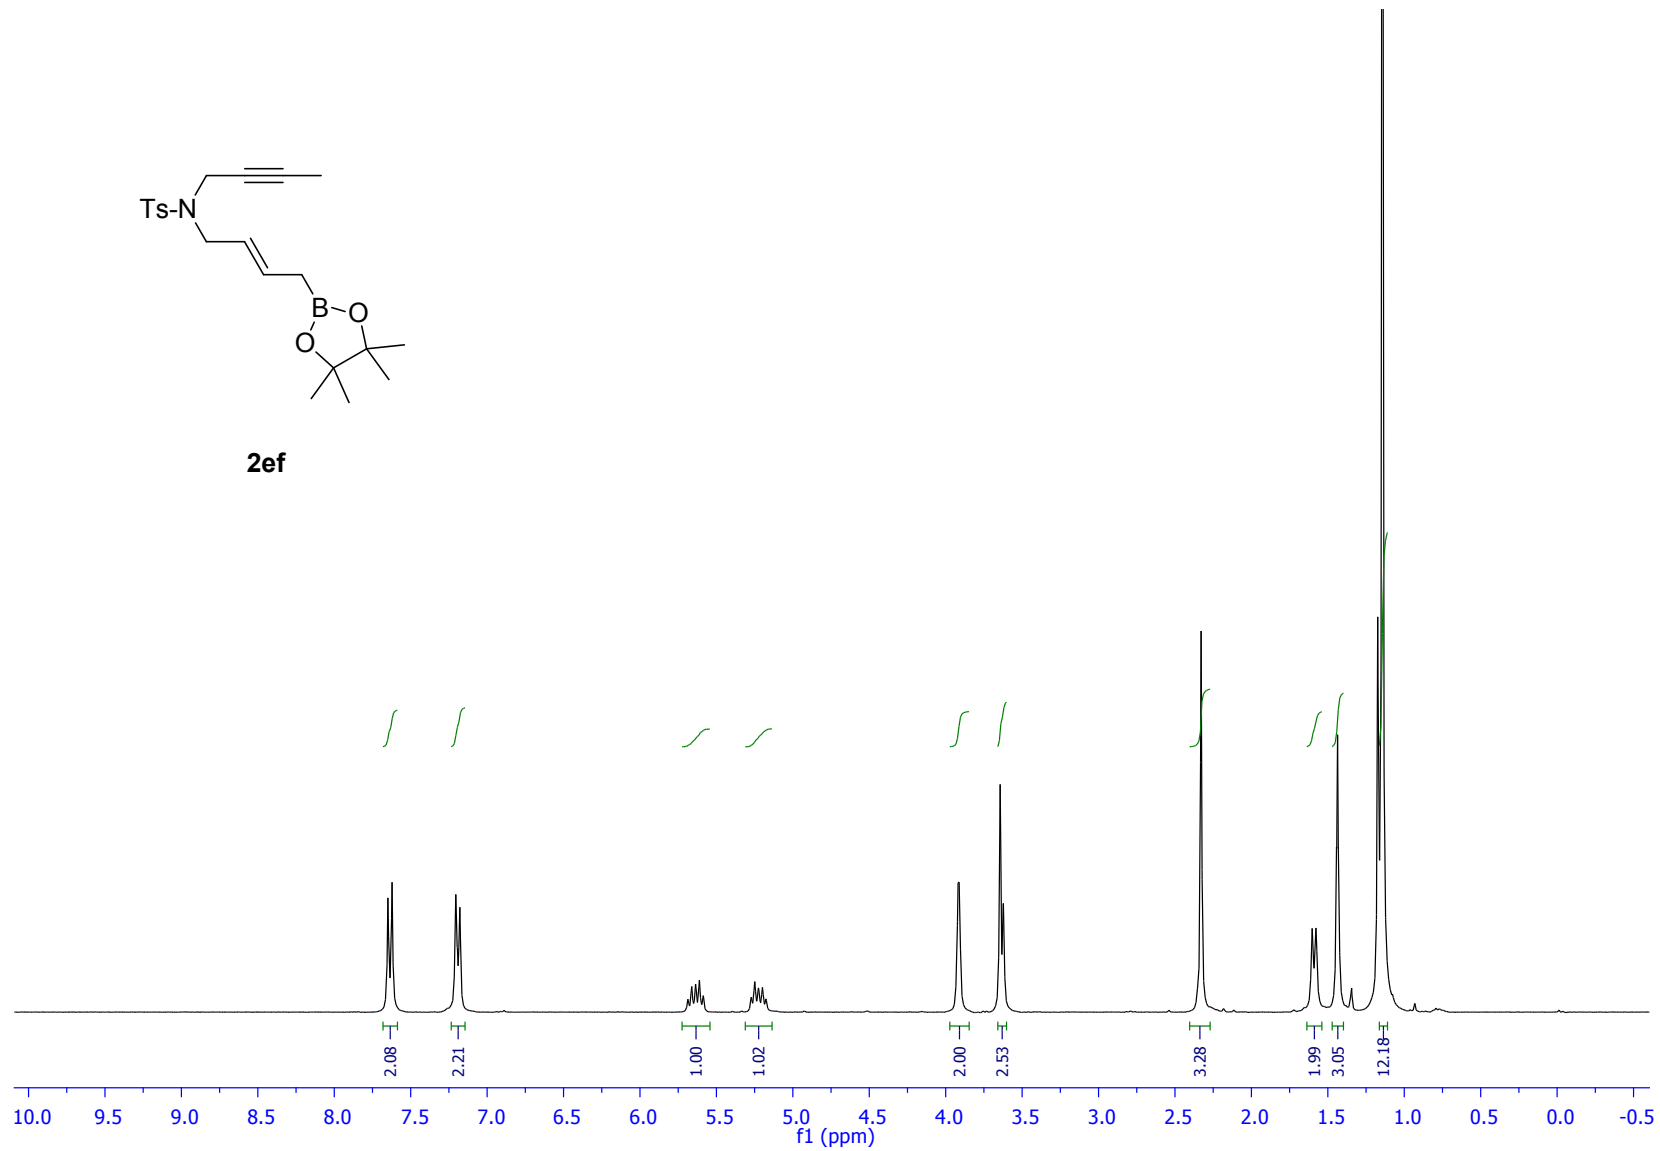

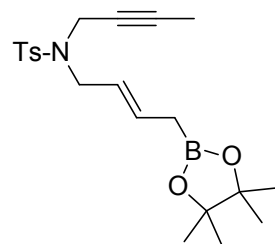

2ef

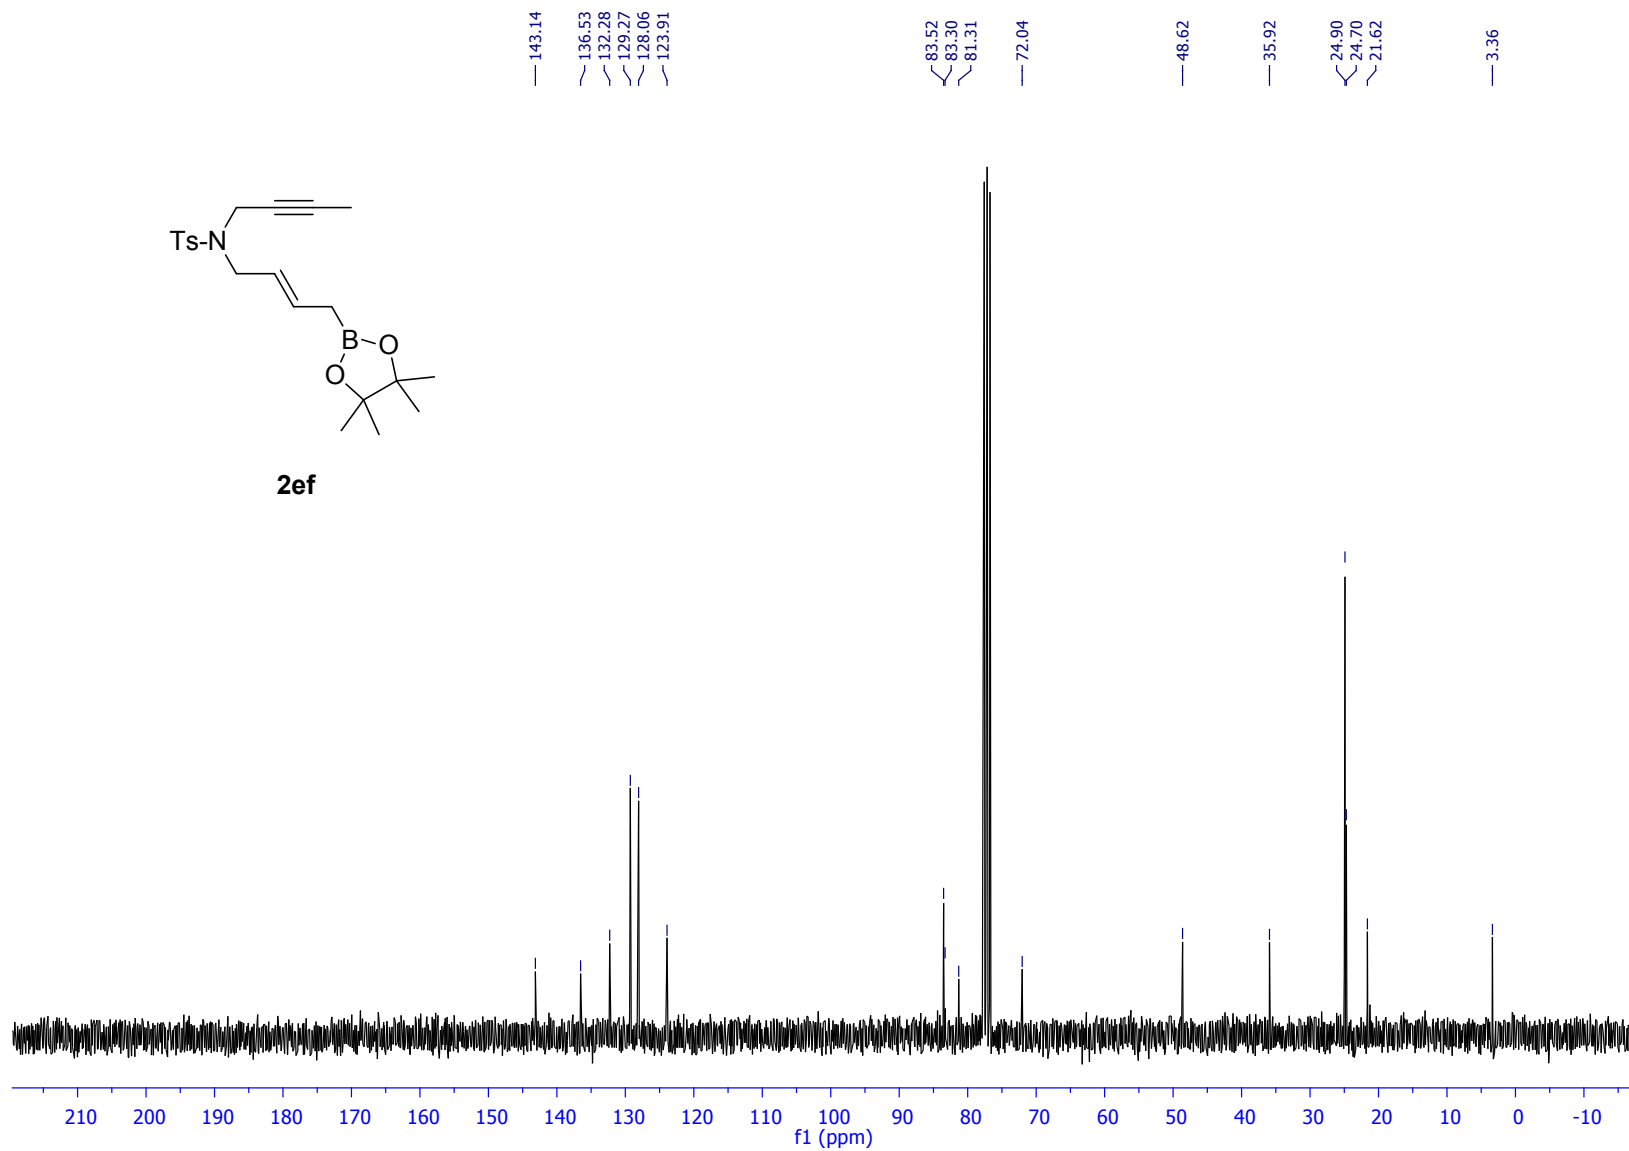

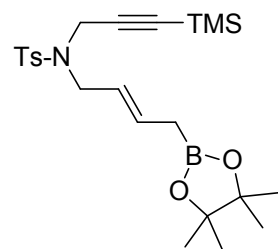

2gh

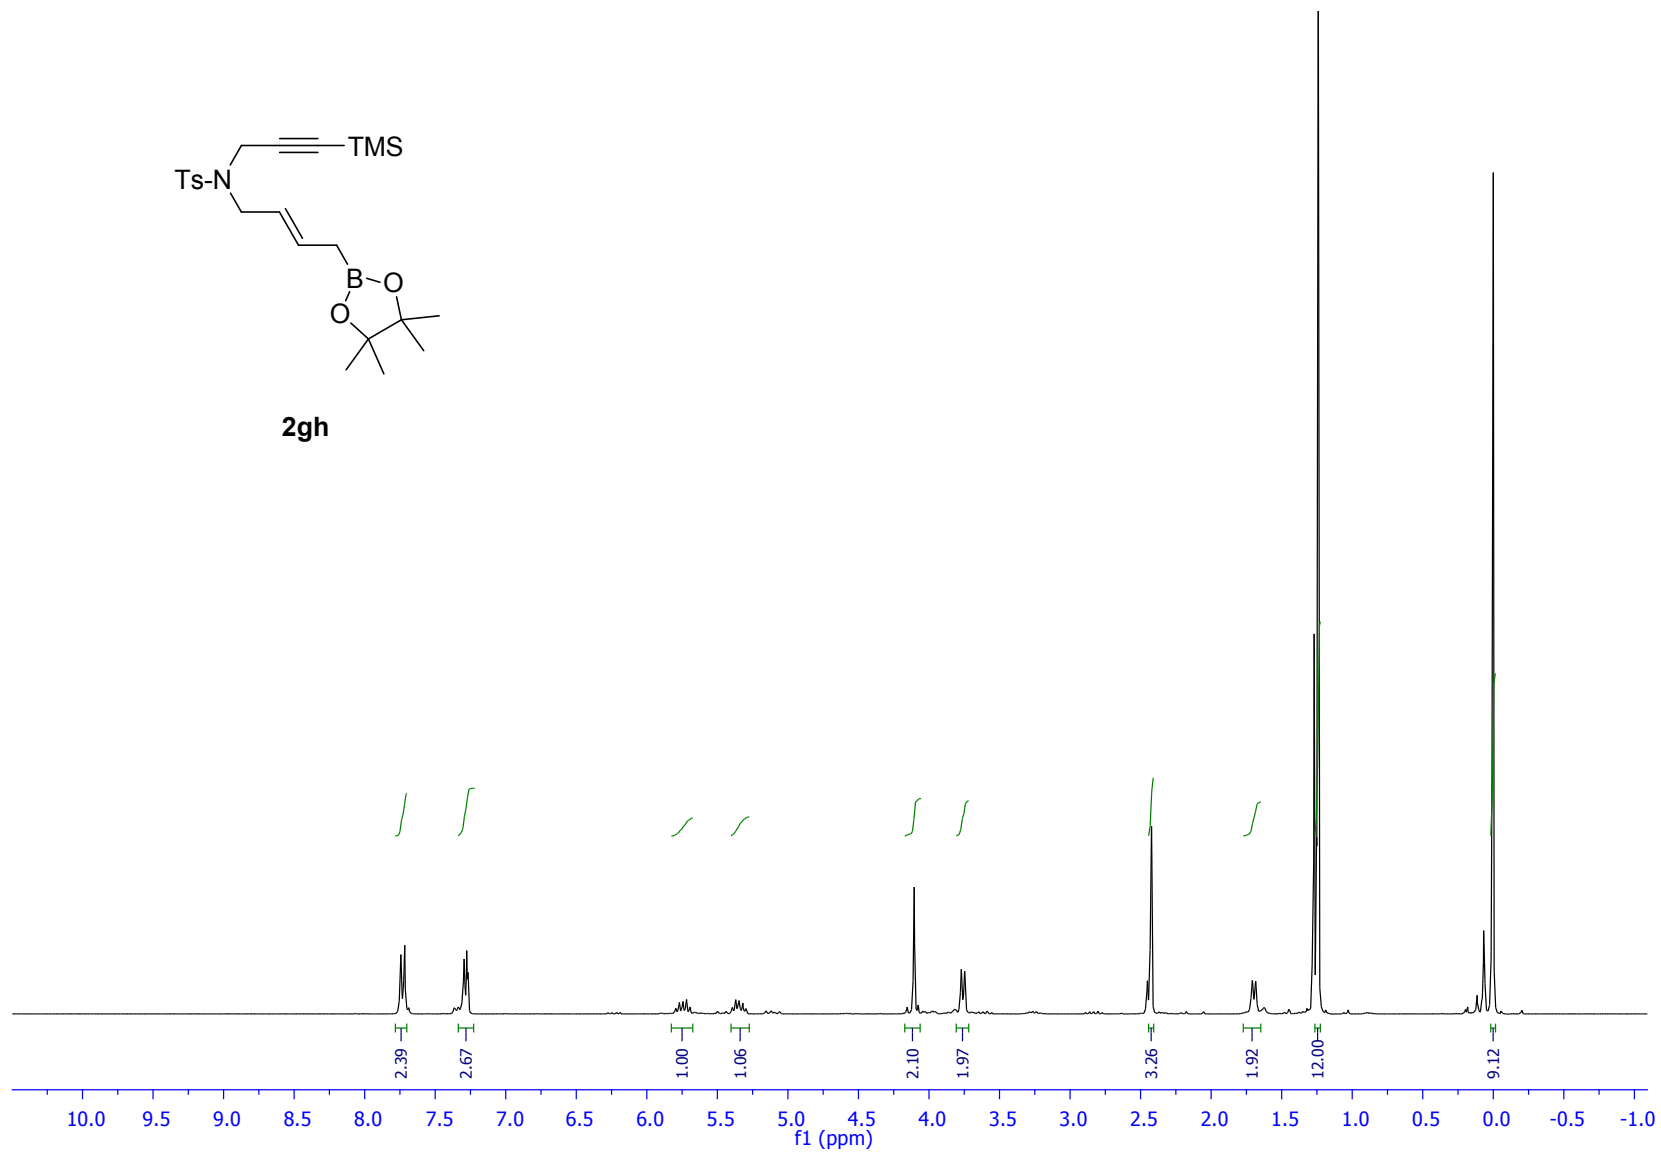



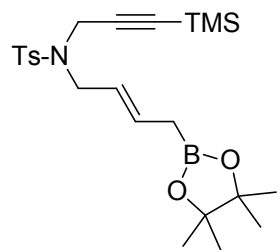

2gh

143.27  
136.38  
132.62  
129.54  
127.97  
123.65

98.34  
90.69  
83.50

48.56  
36.43

24.90  
21.63

-0.23

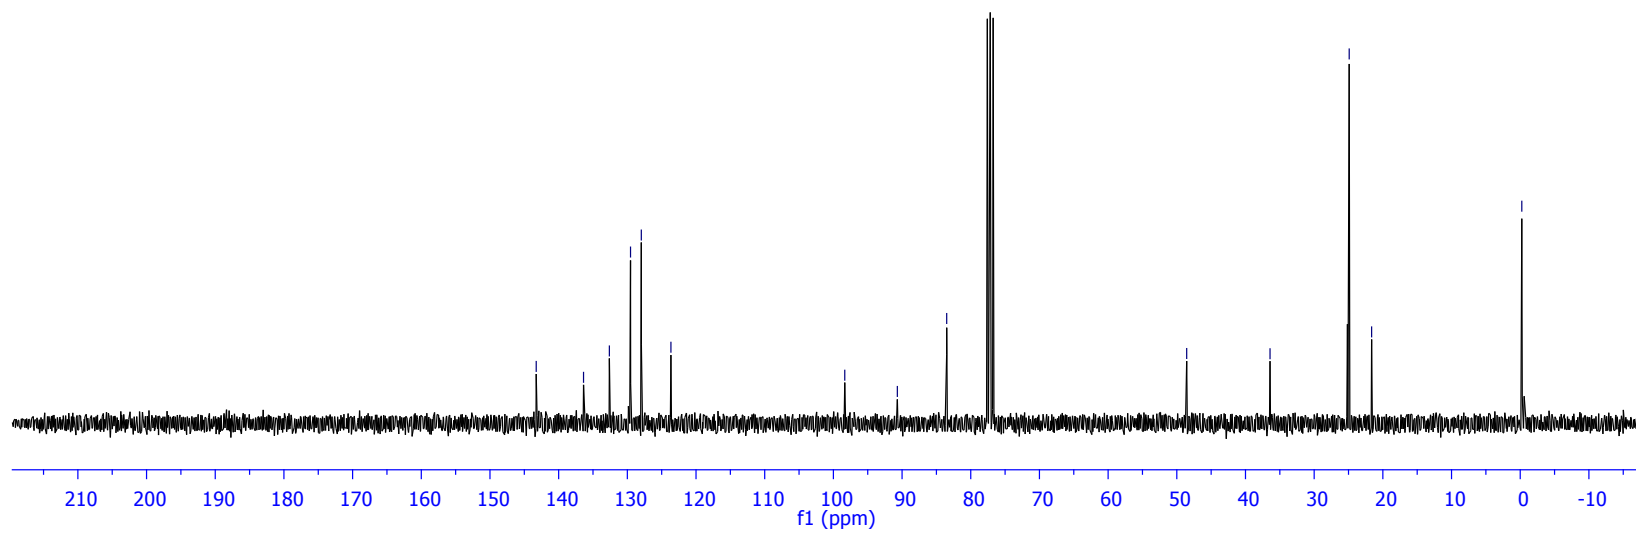

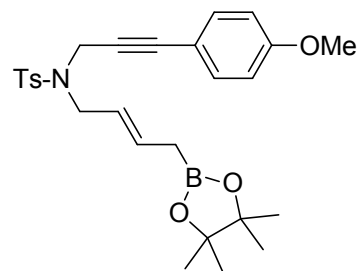

2i

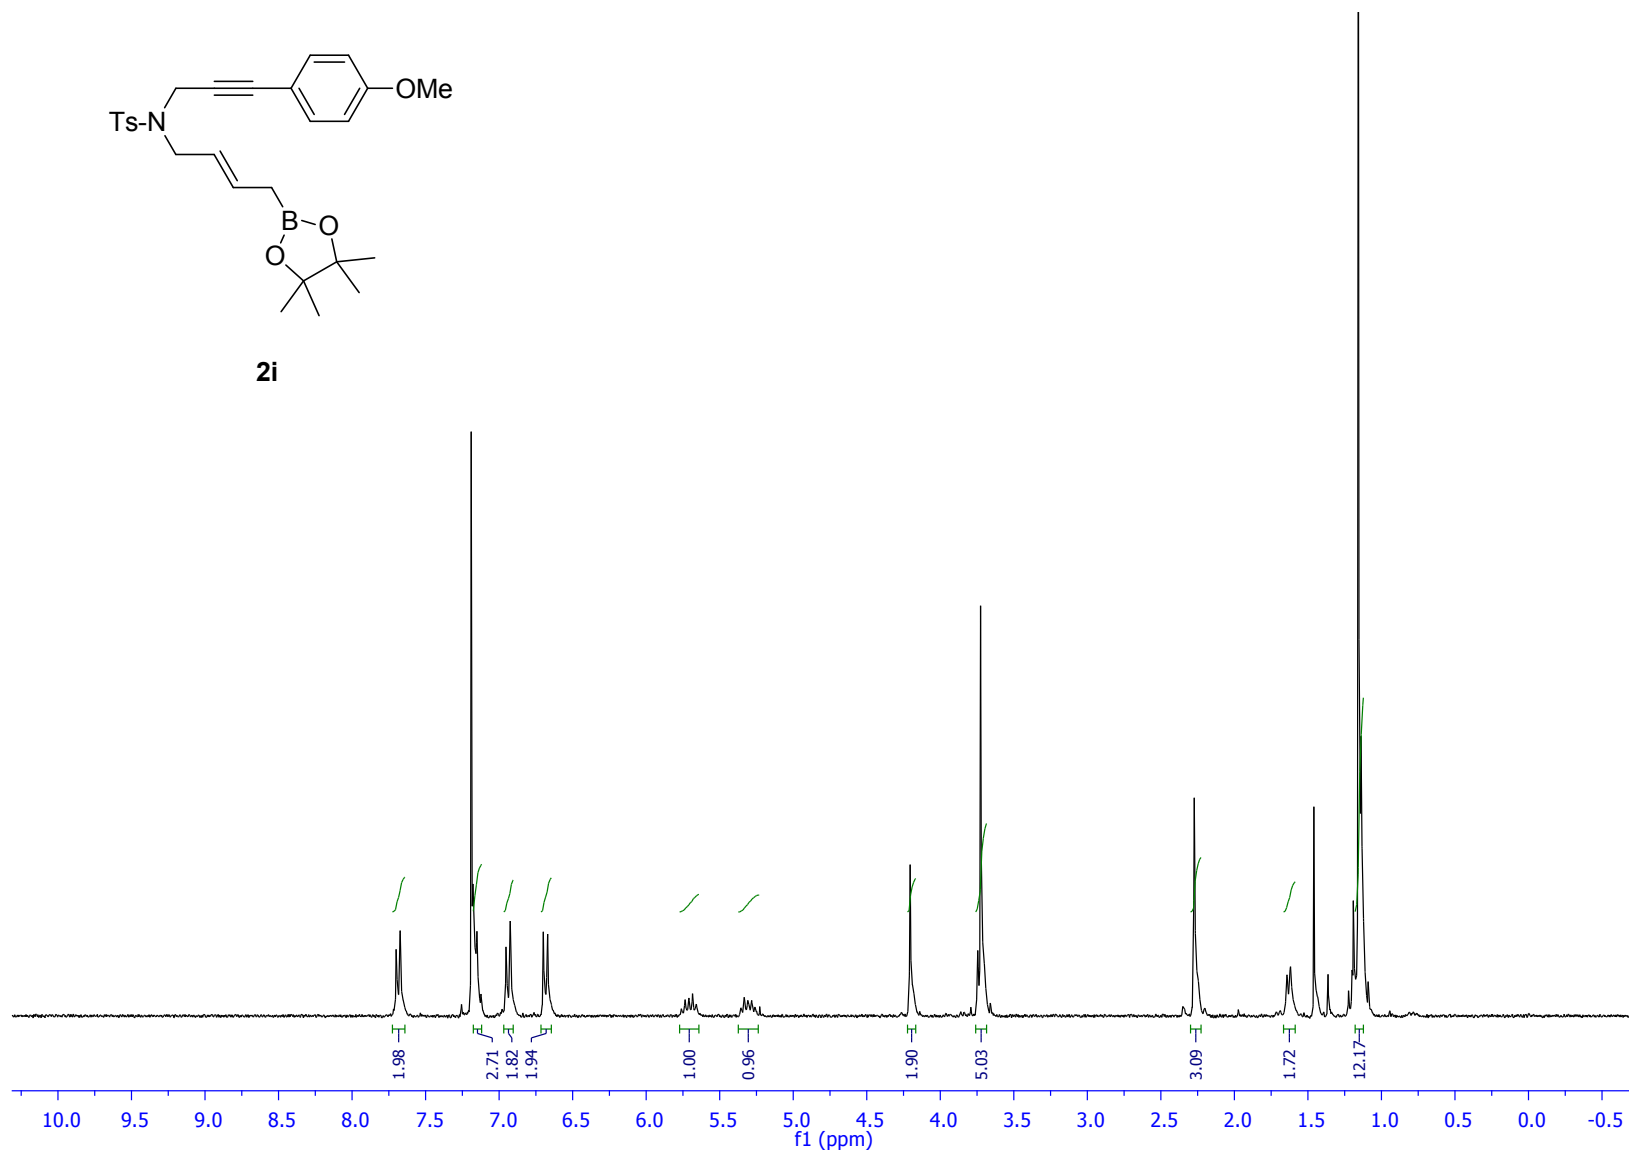

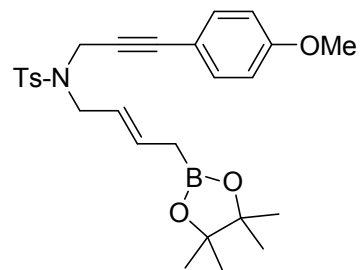

2i

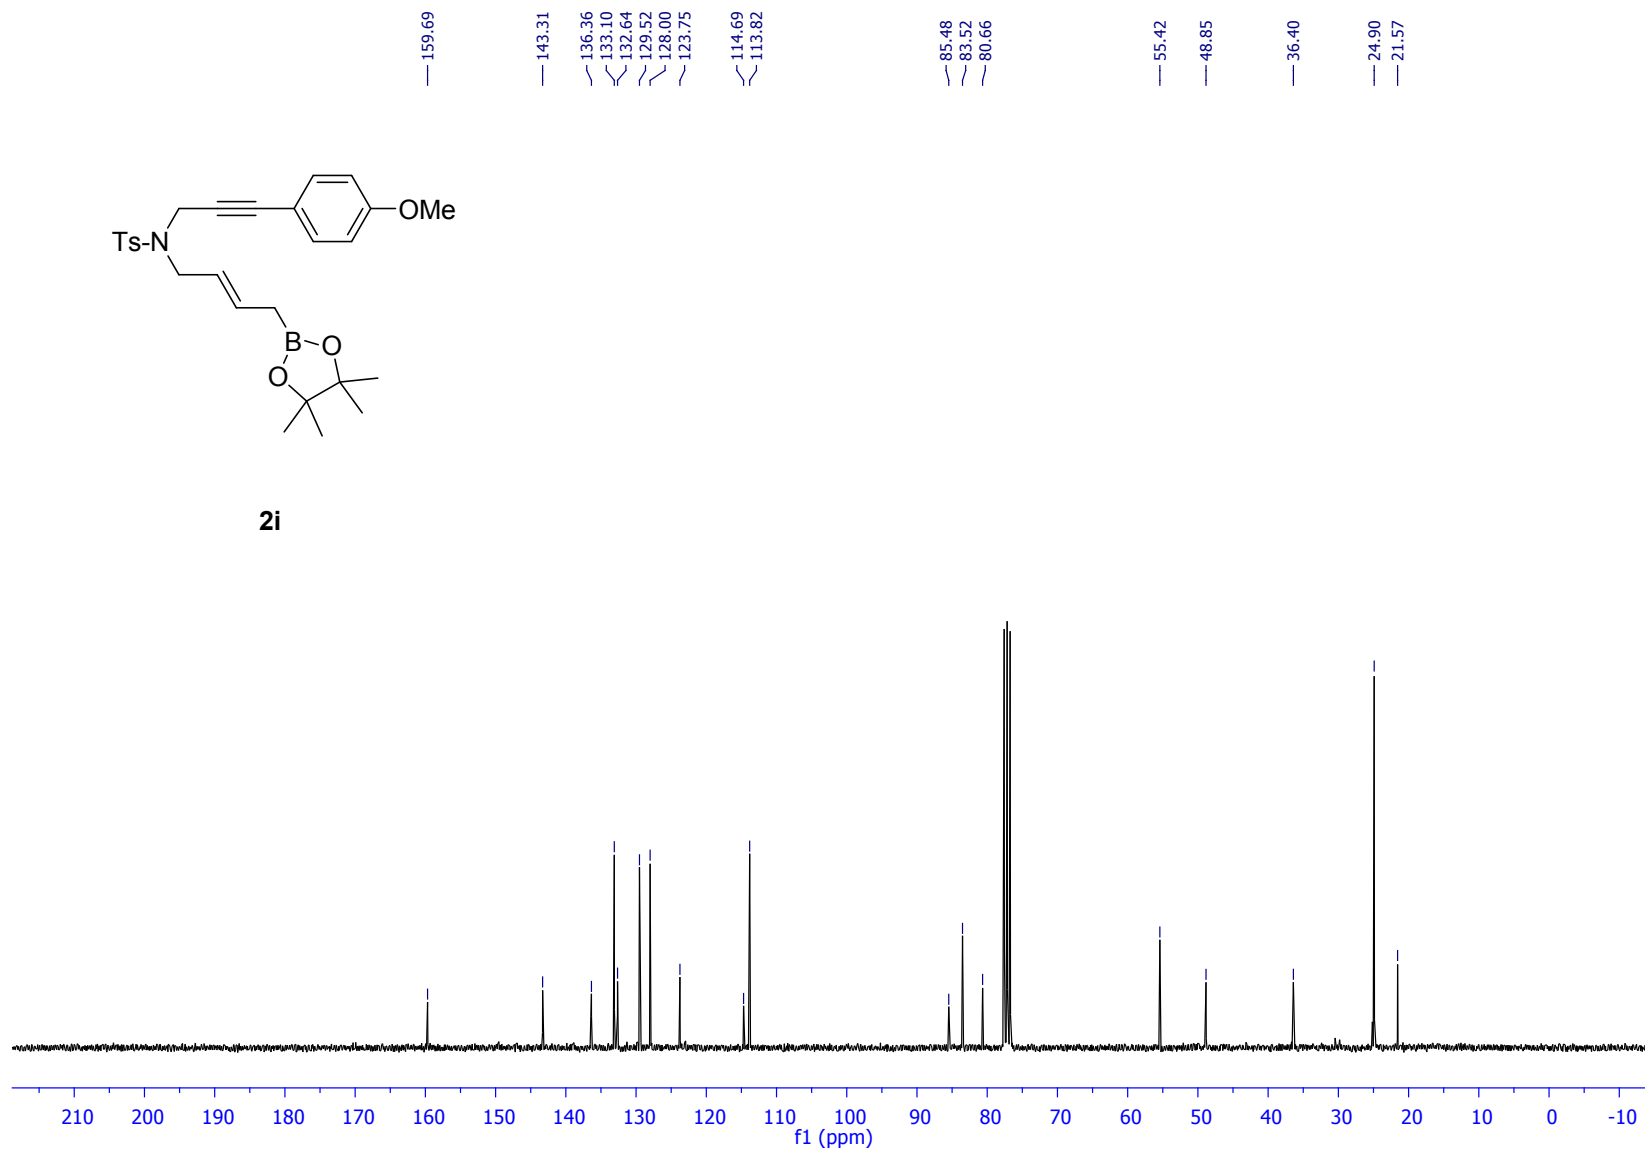

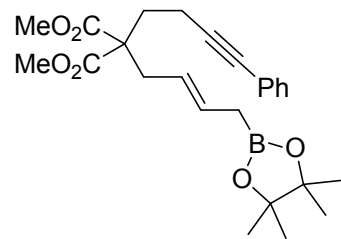

2j

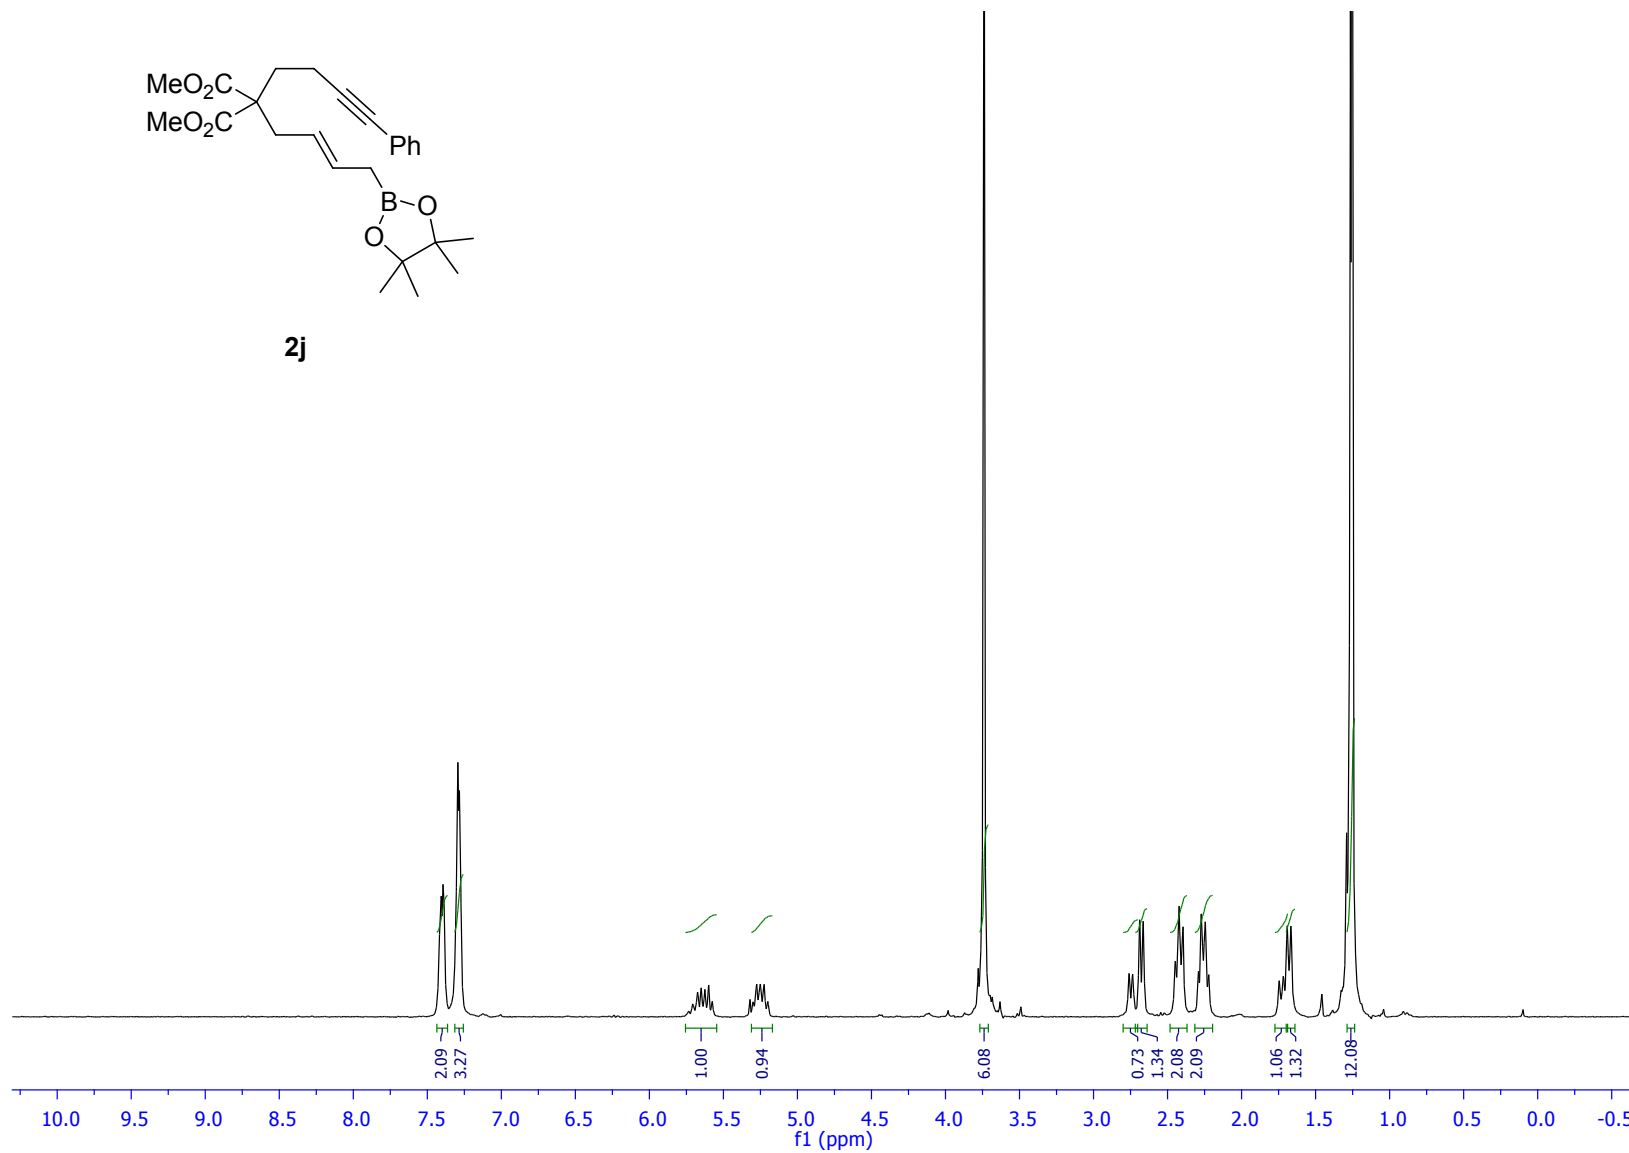

S76

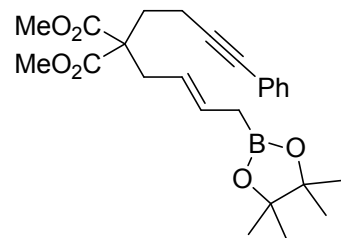

2j

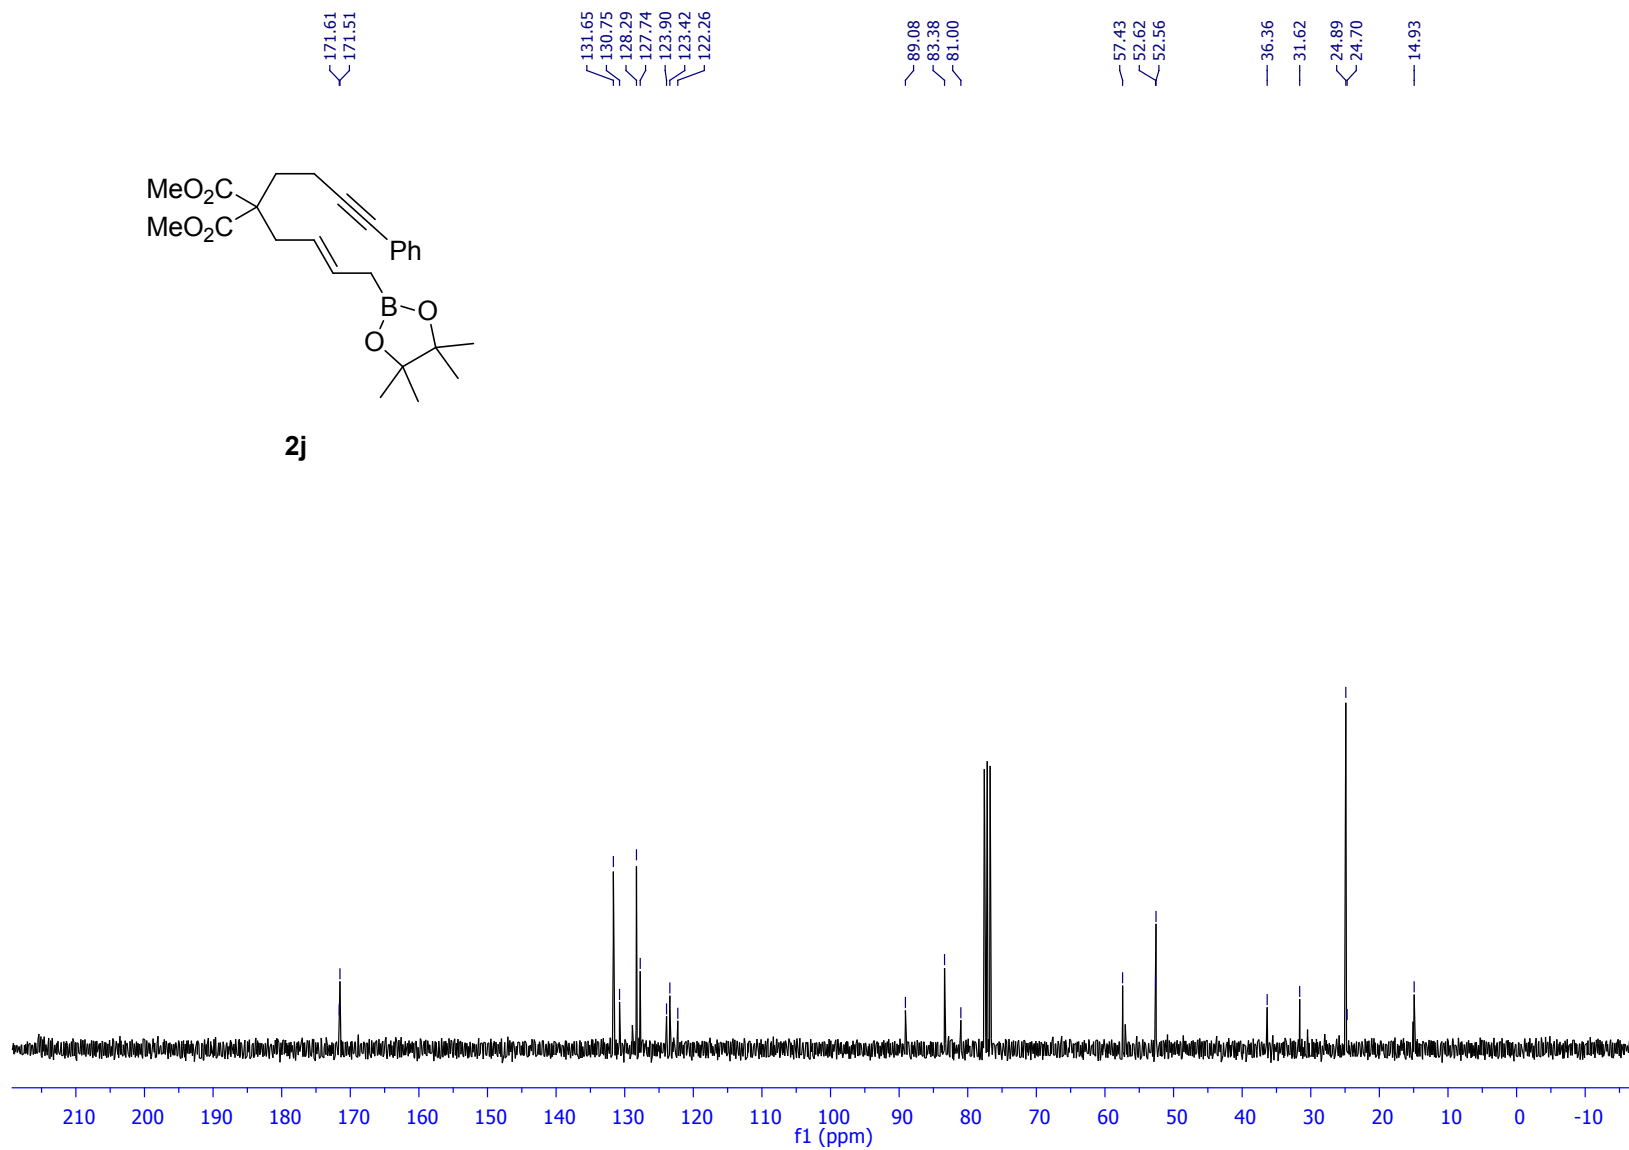

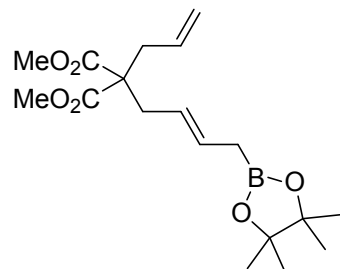

2k

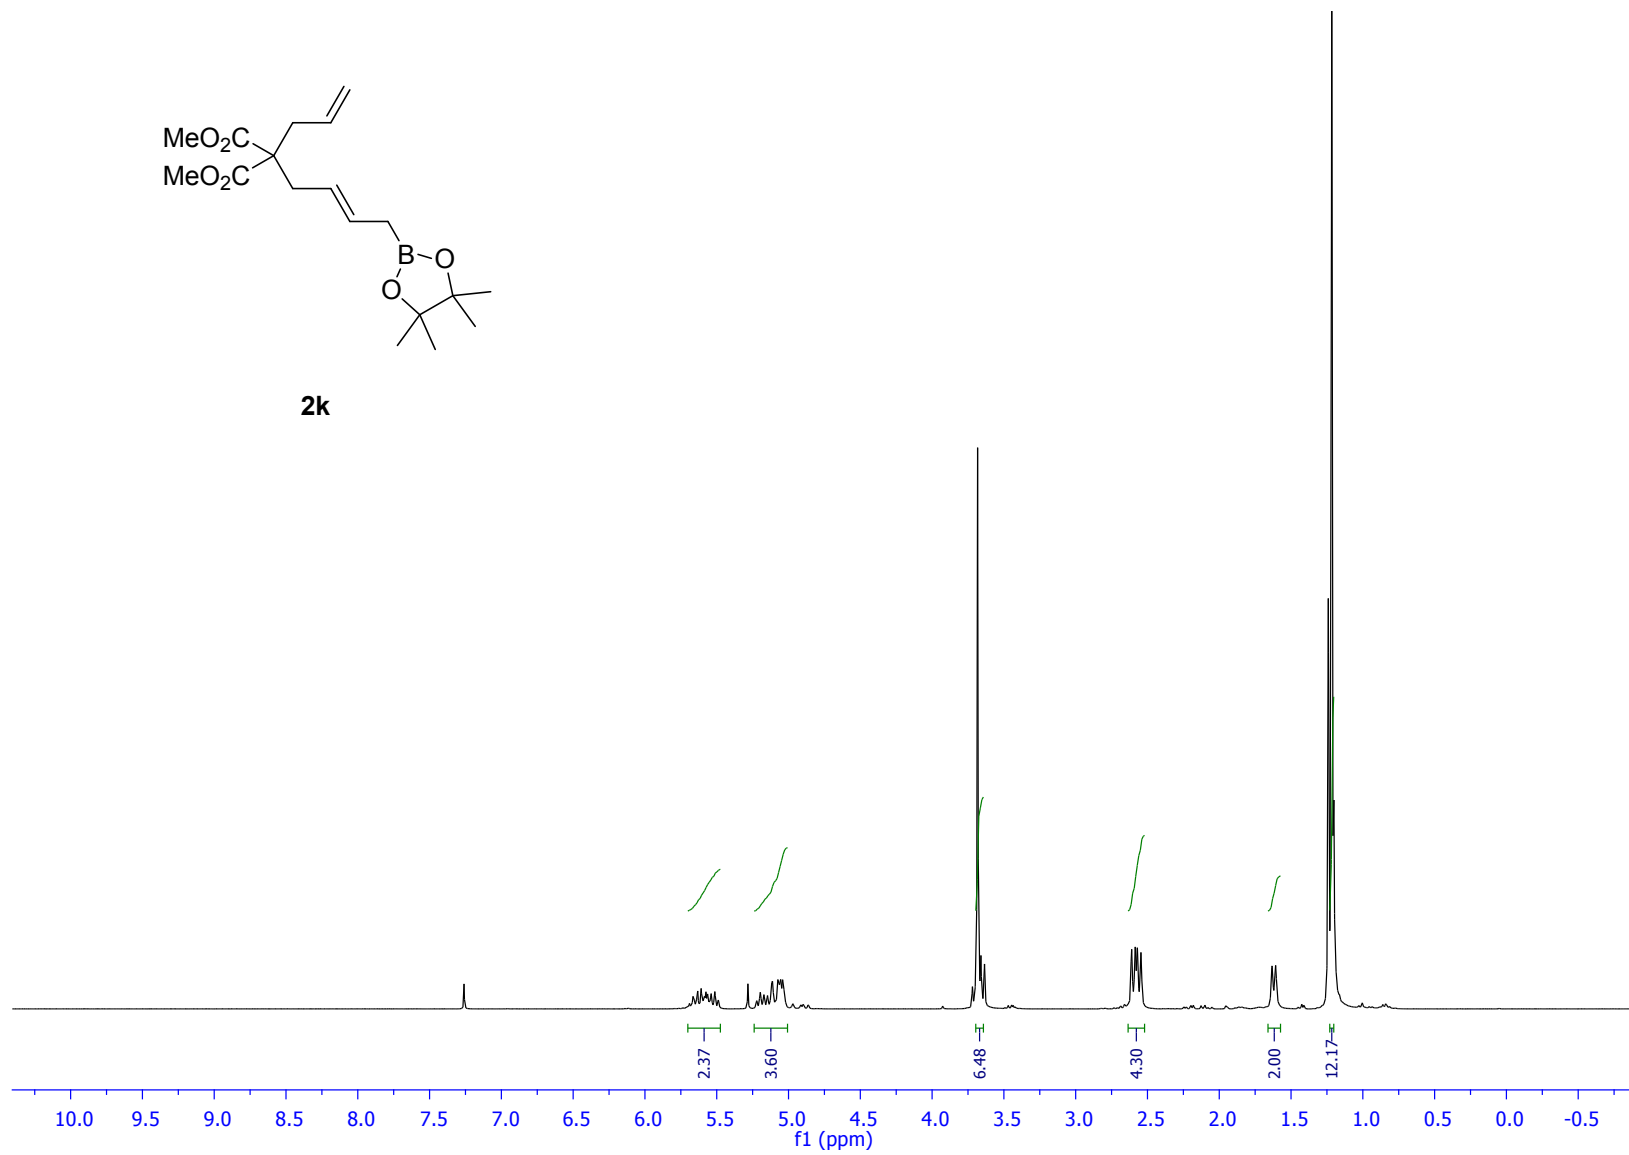

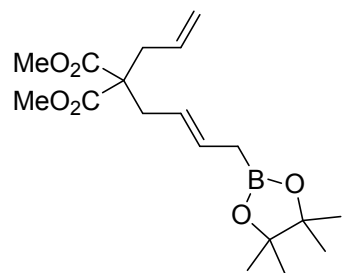

2k

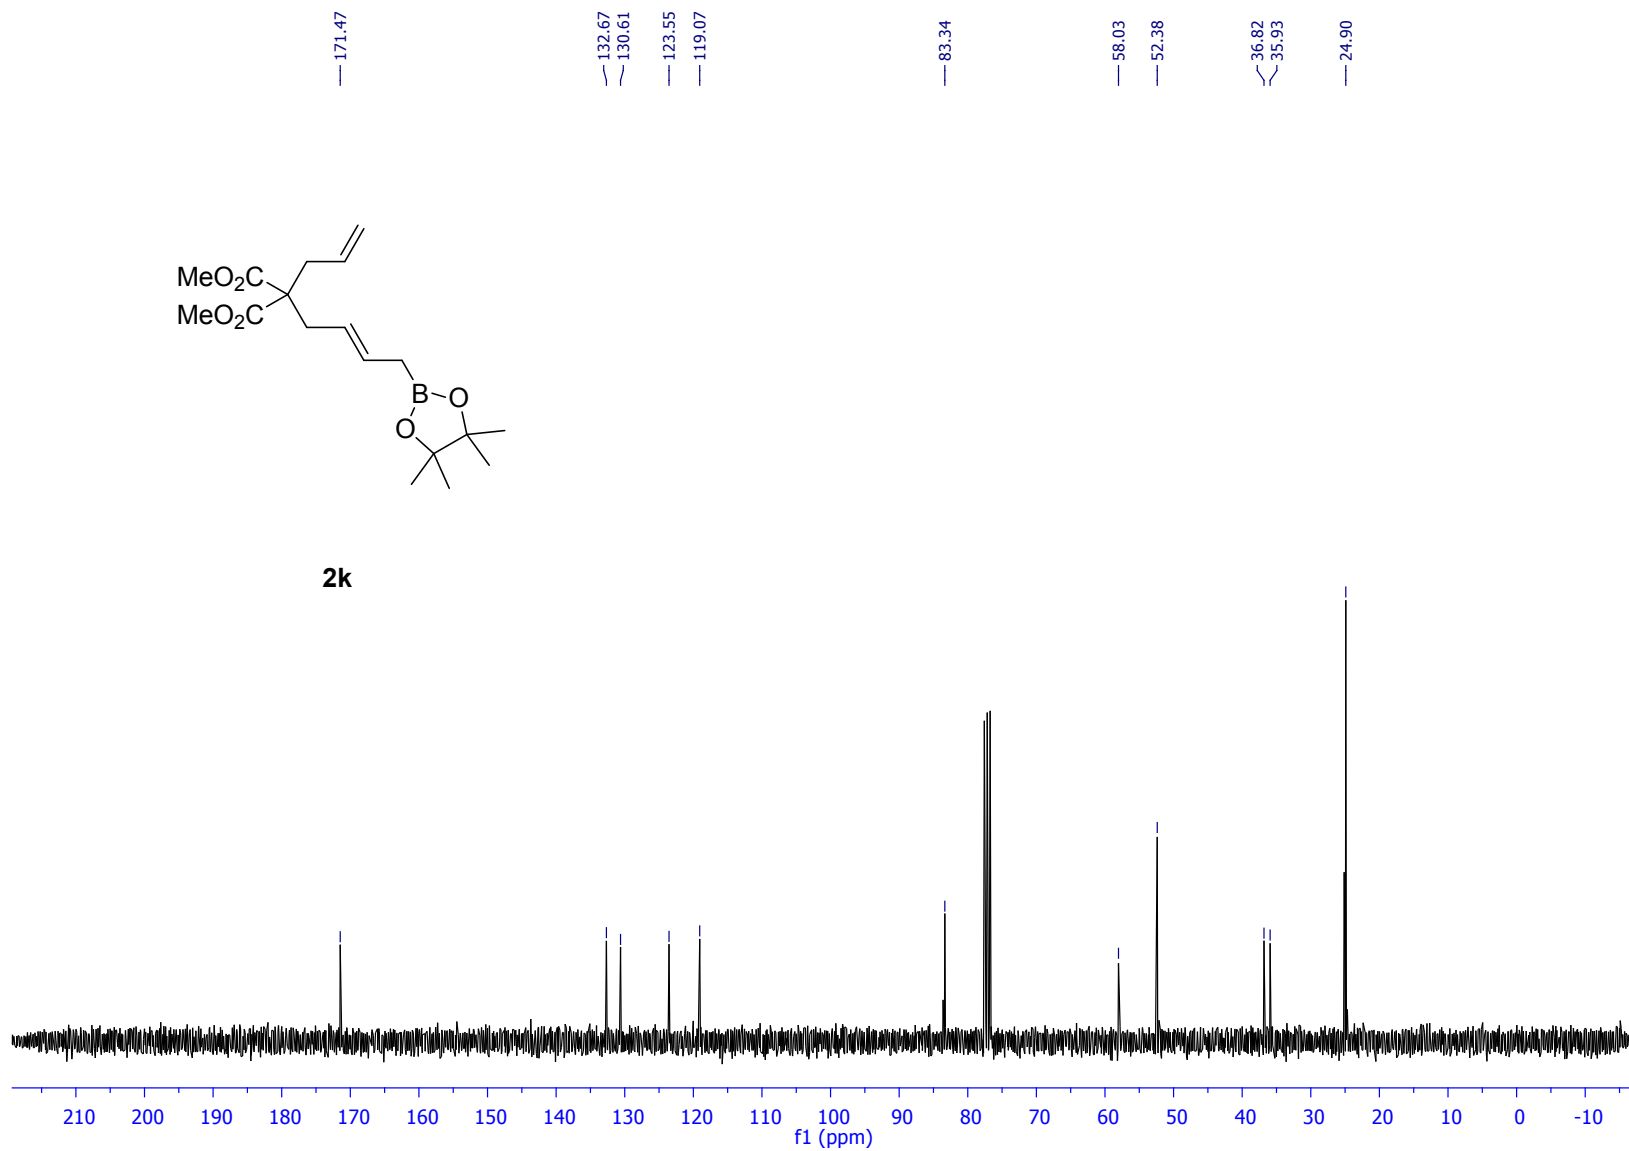

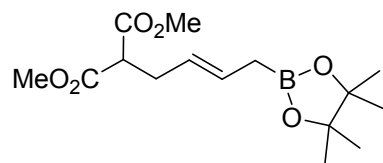

21

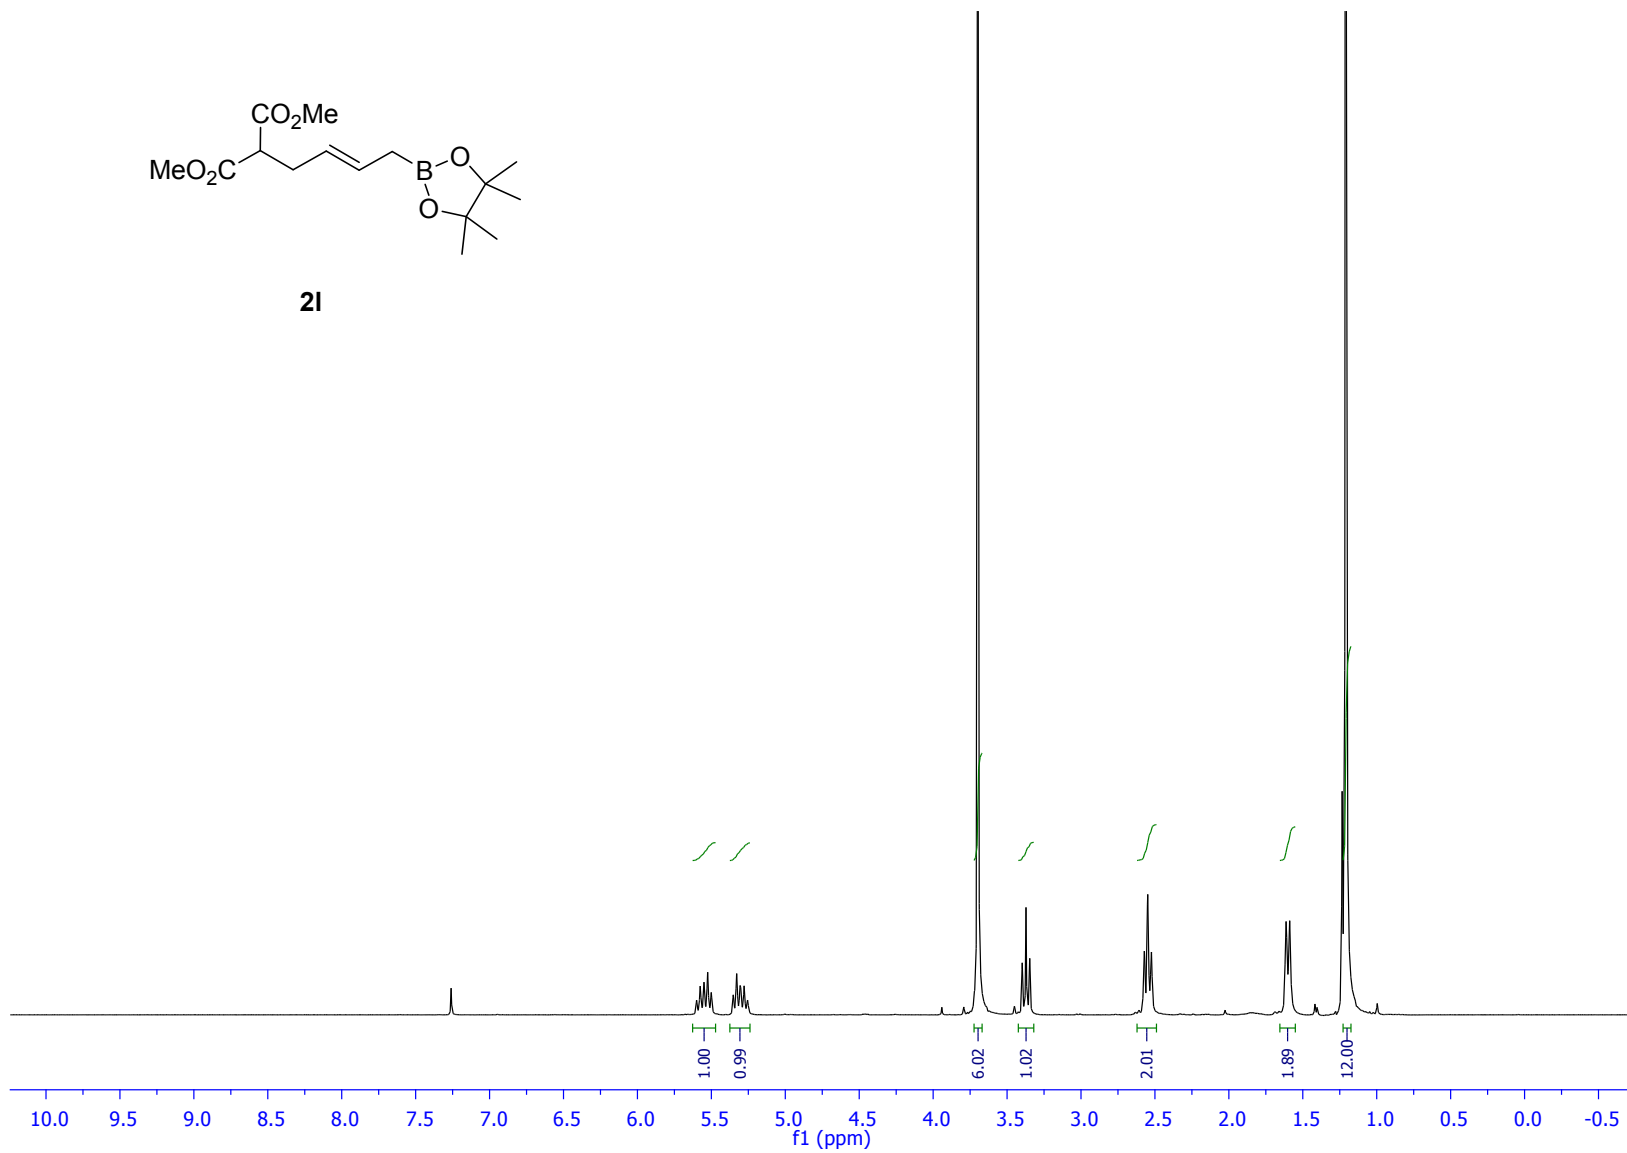

S80



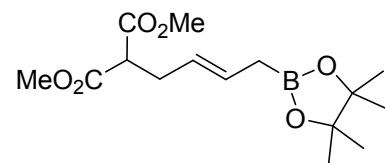

2l

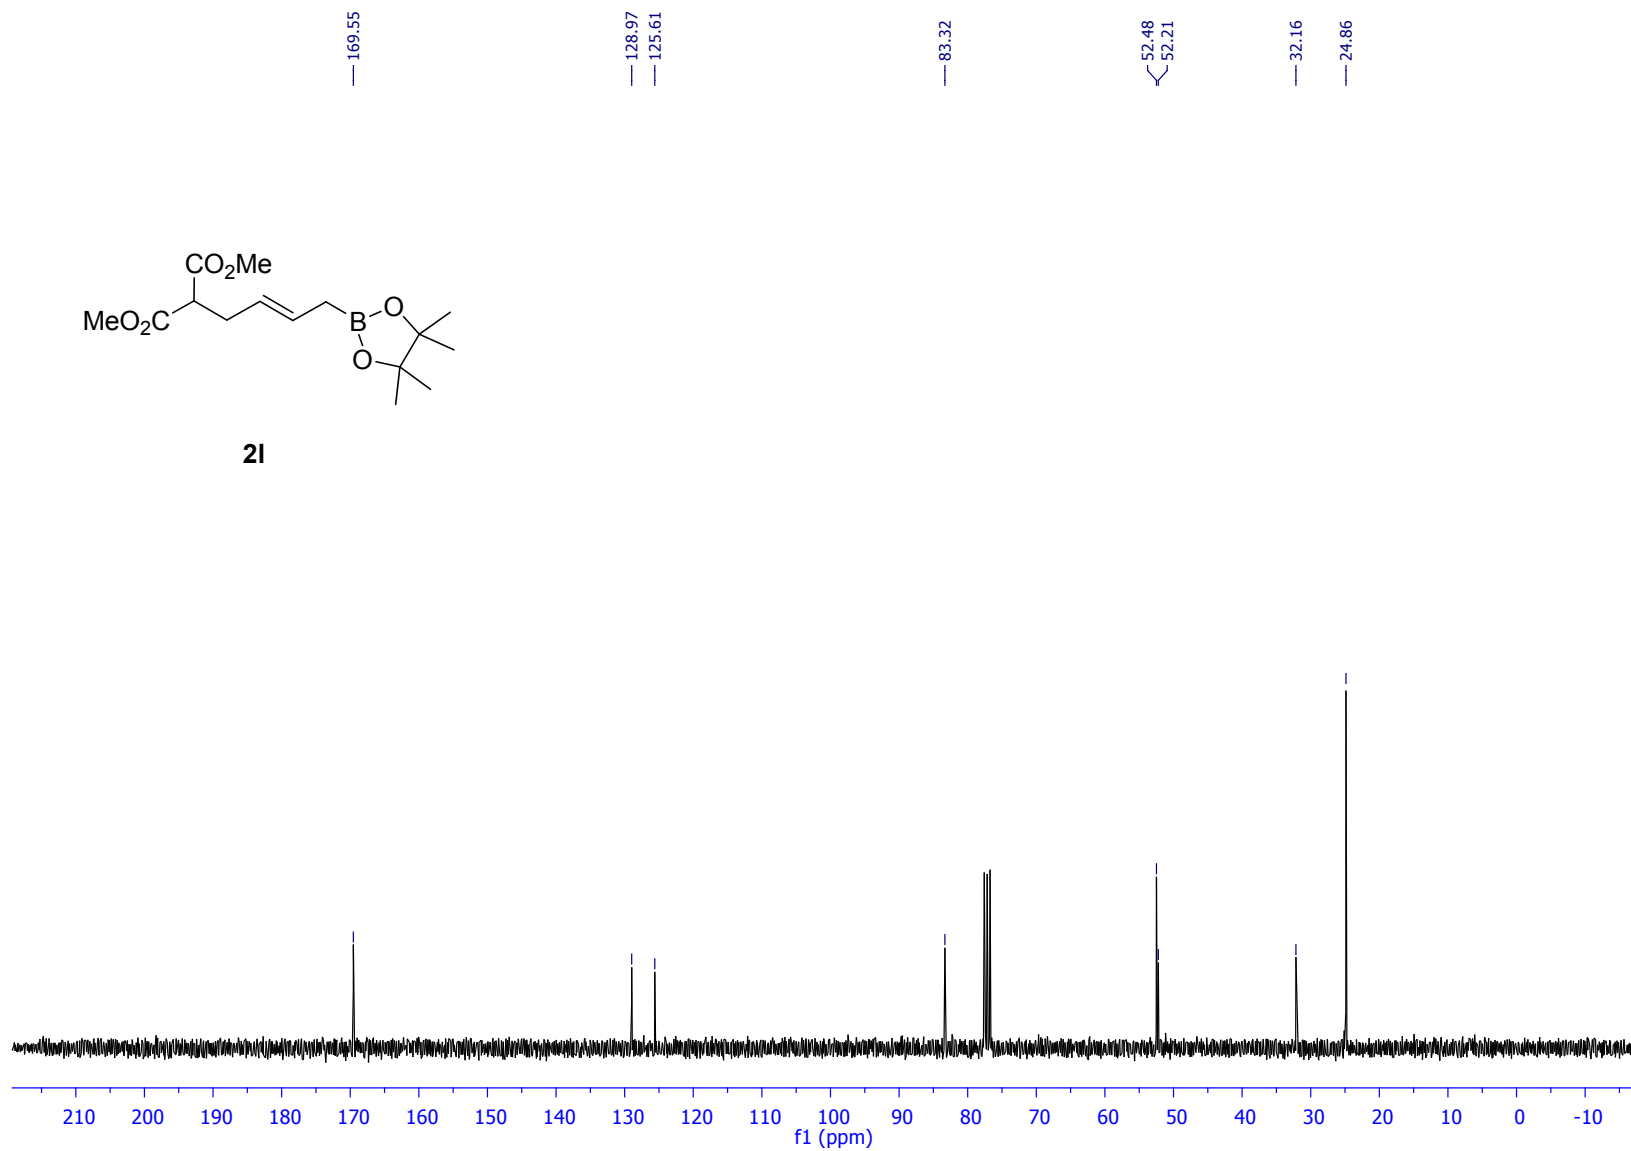

$^1\text{H-NMR}$  and  $^{13}\text{C-NMR}$  spectra of alkenylboronates

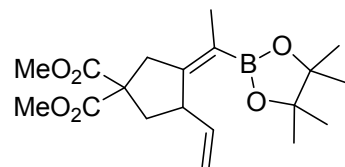

**3ab**

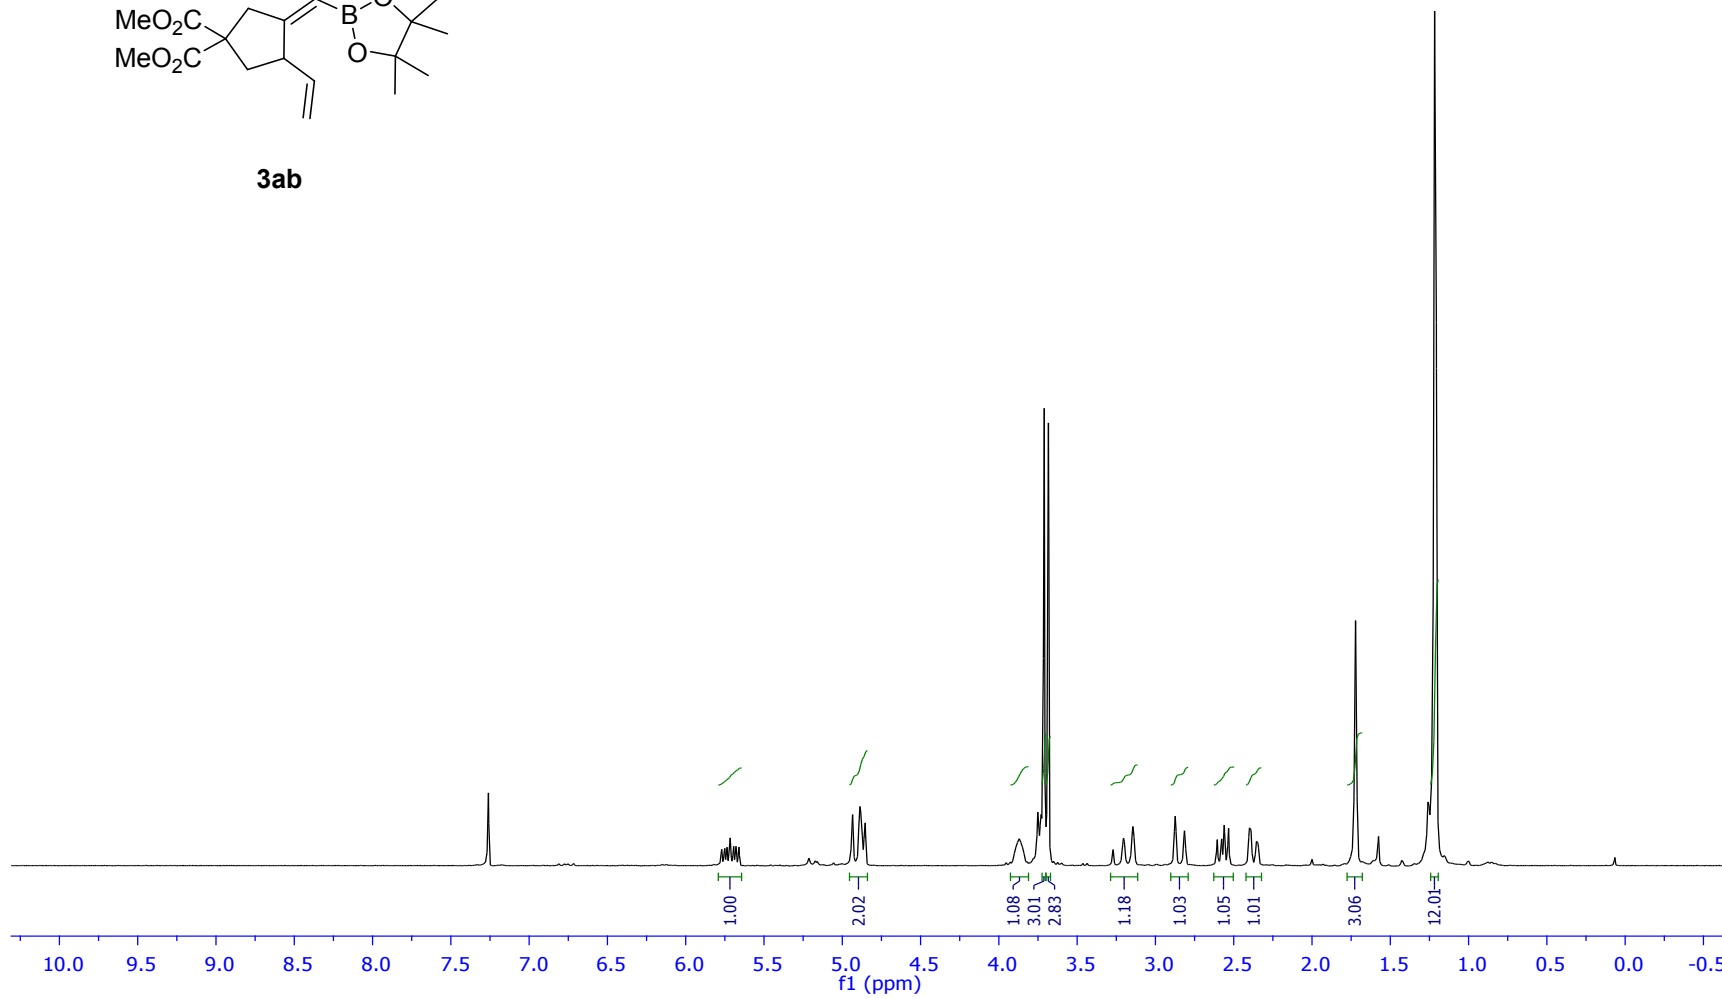

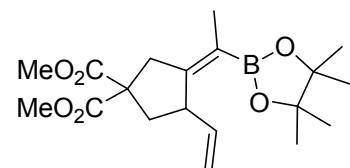

**3ab**

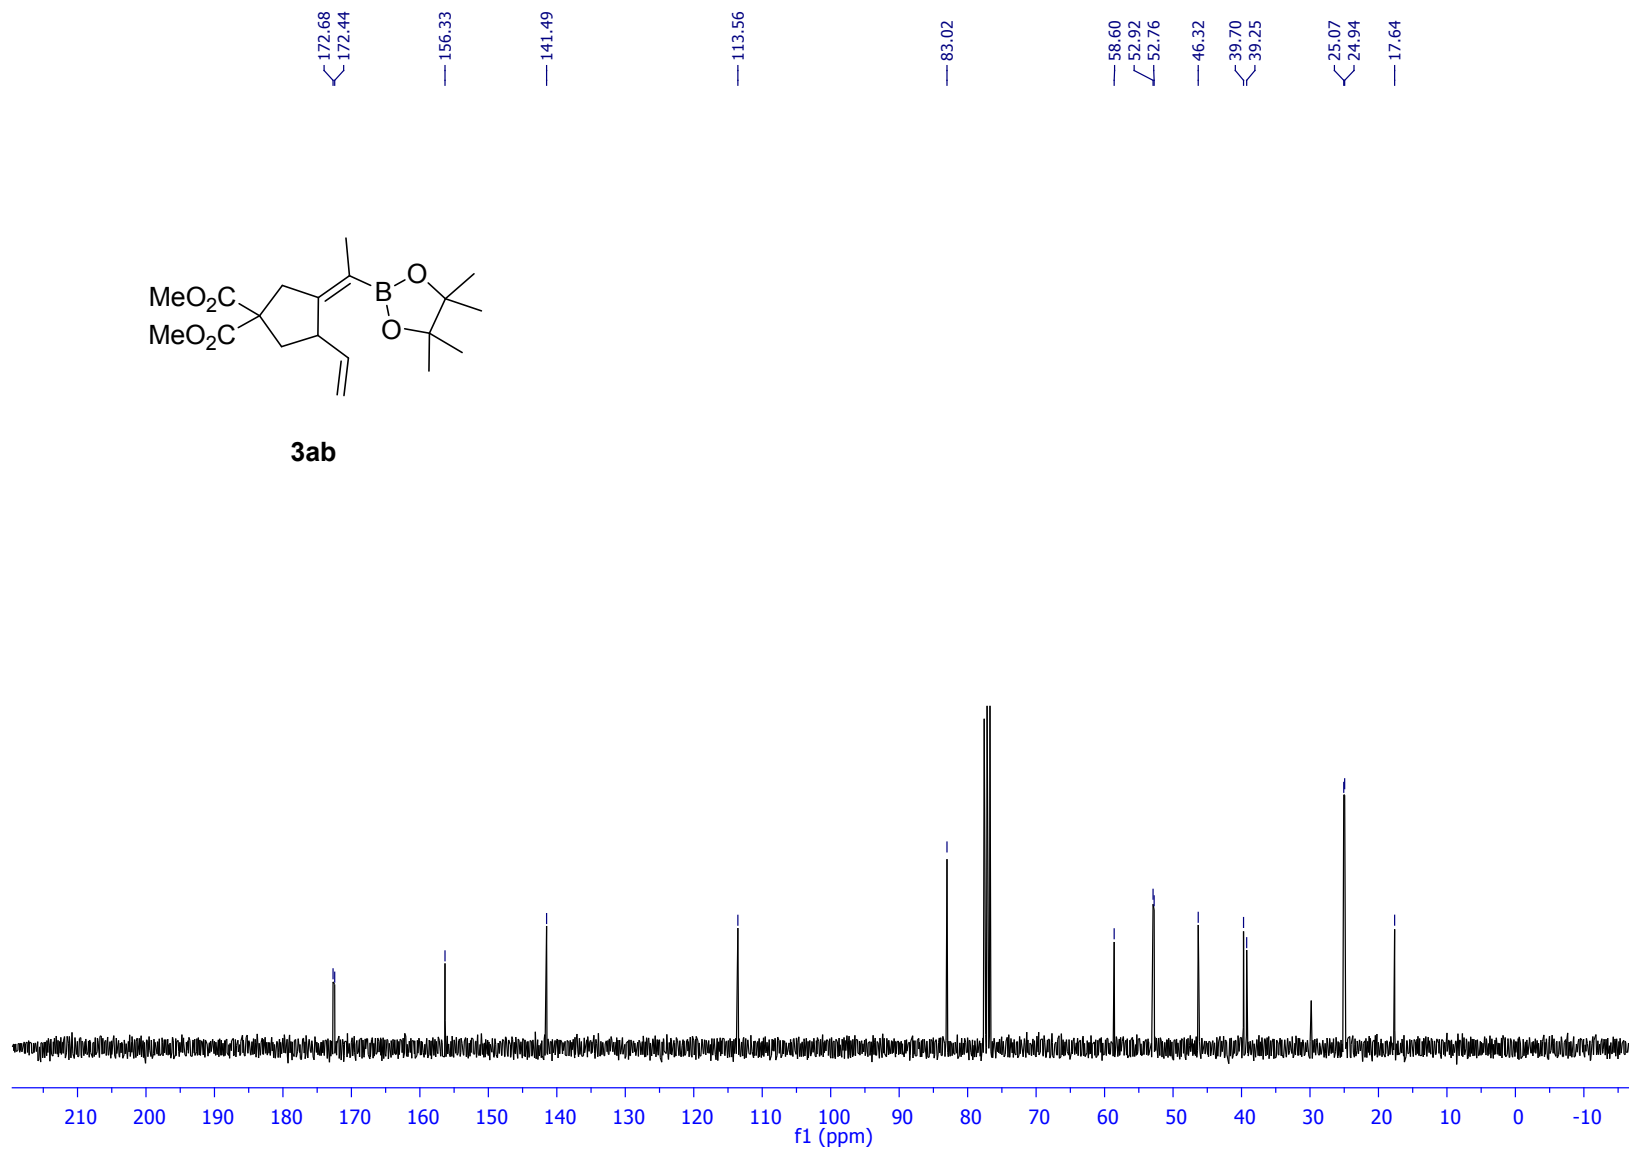

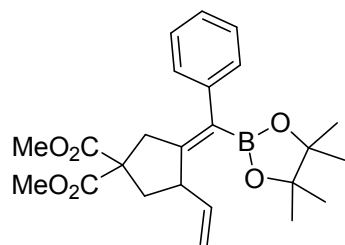

3cd

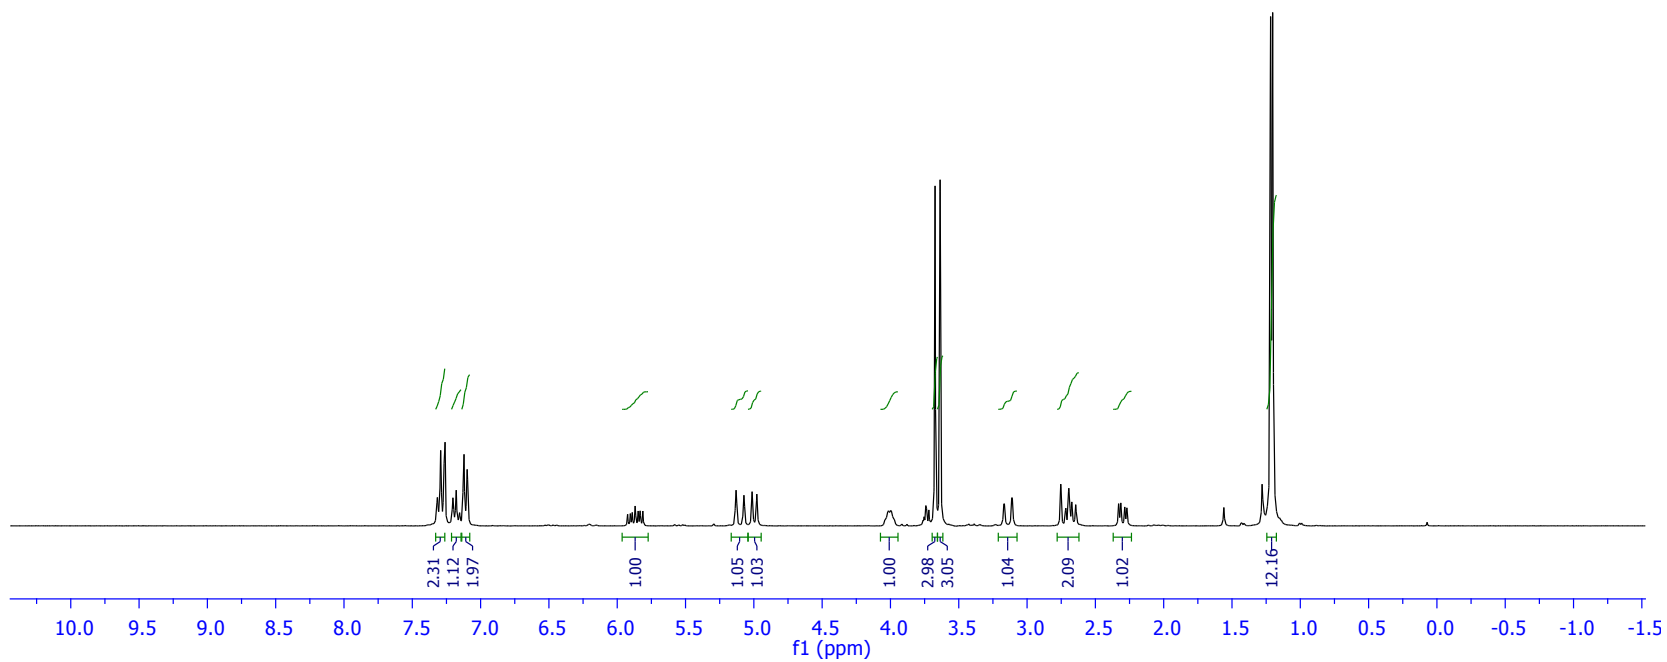

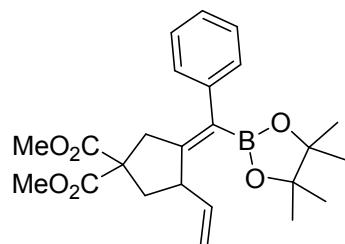

3cd

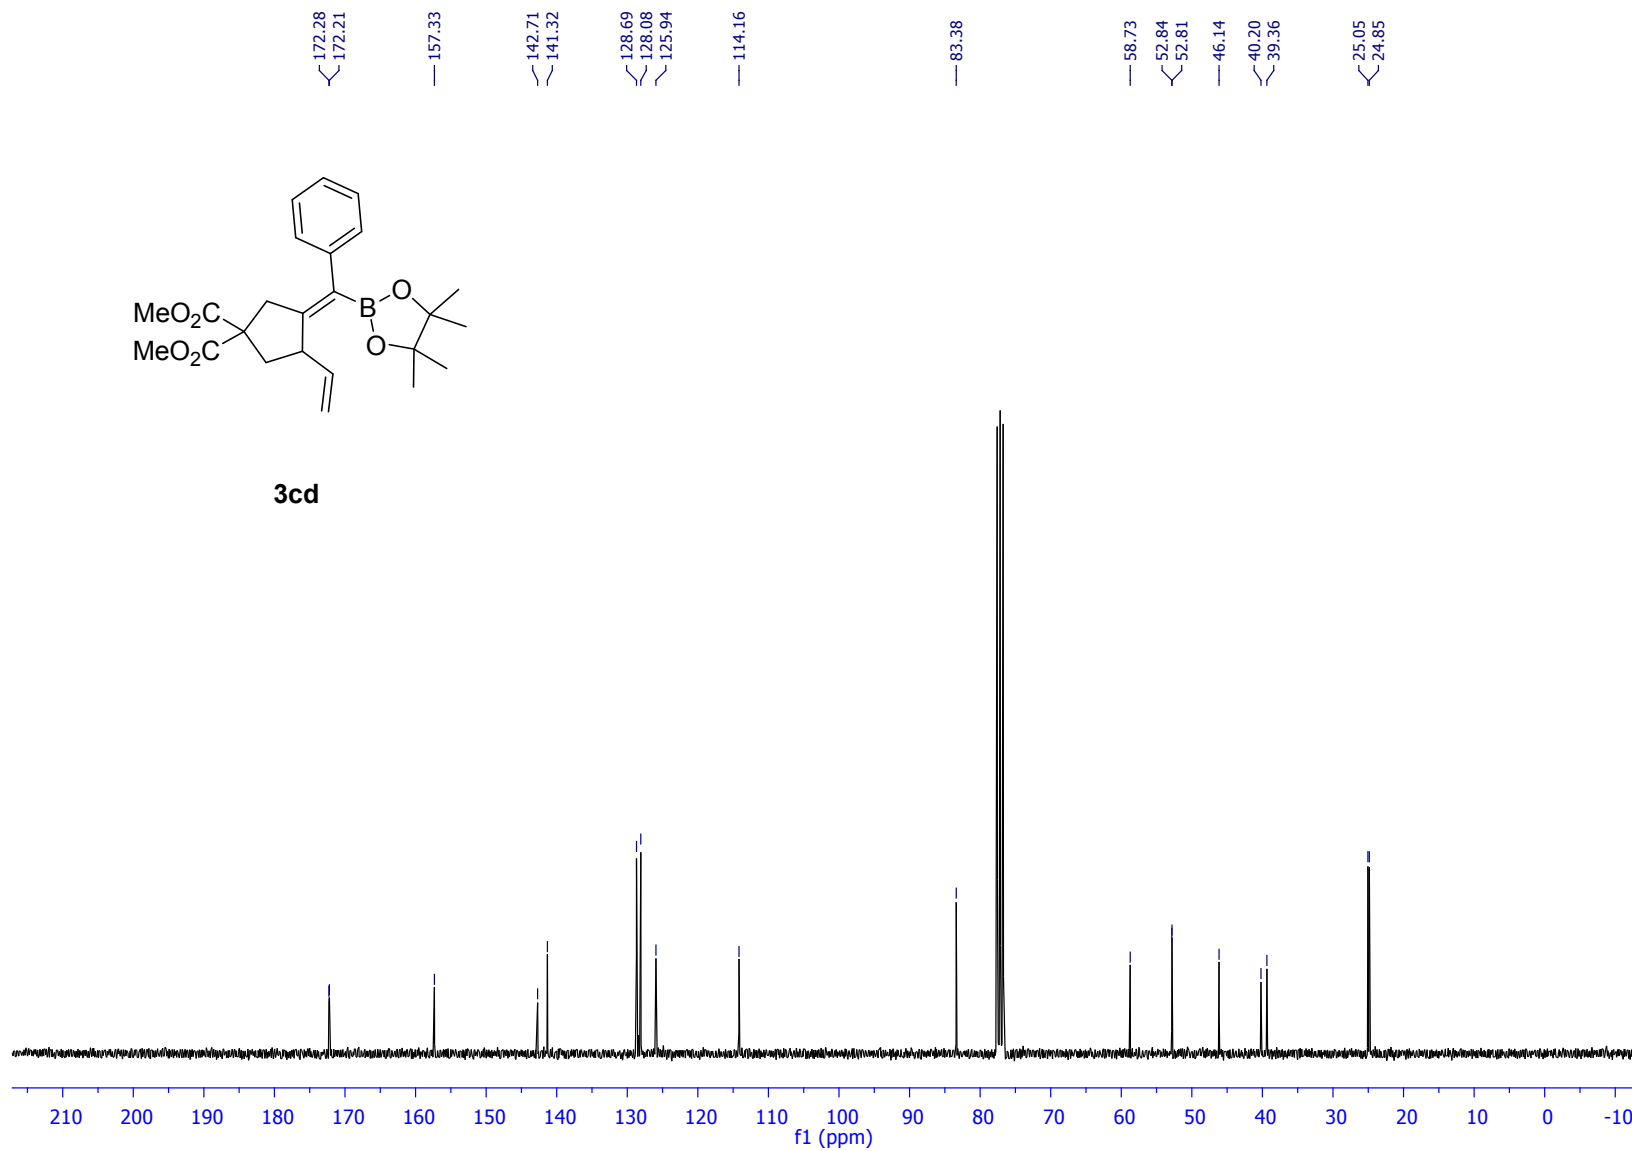

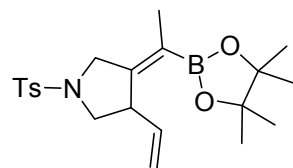

**3ef**

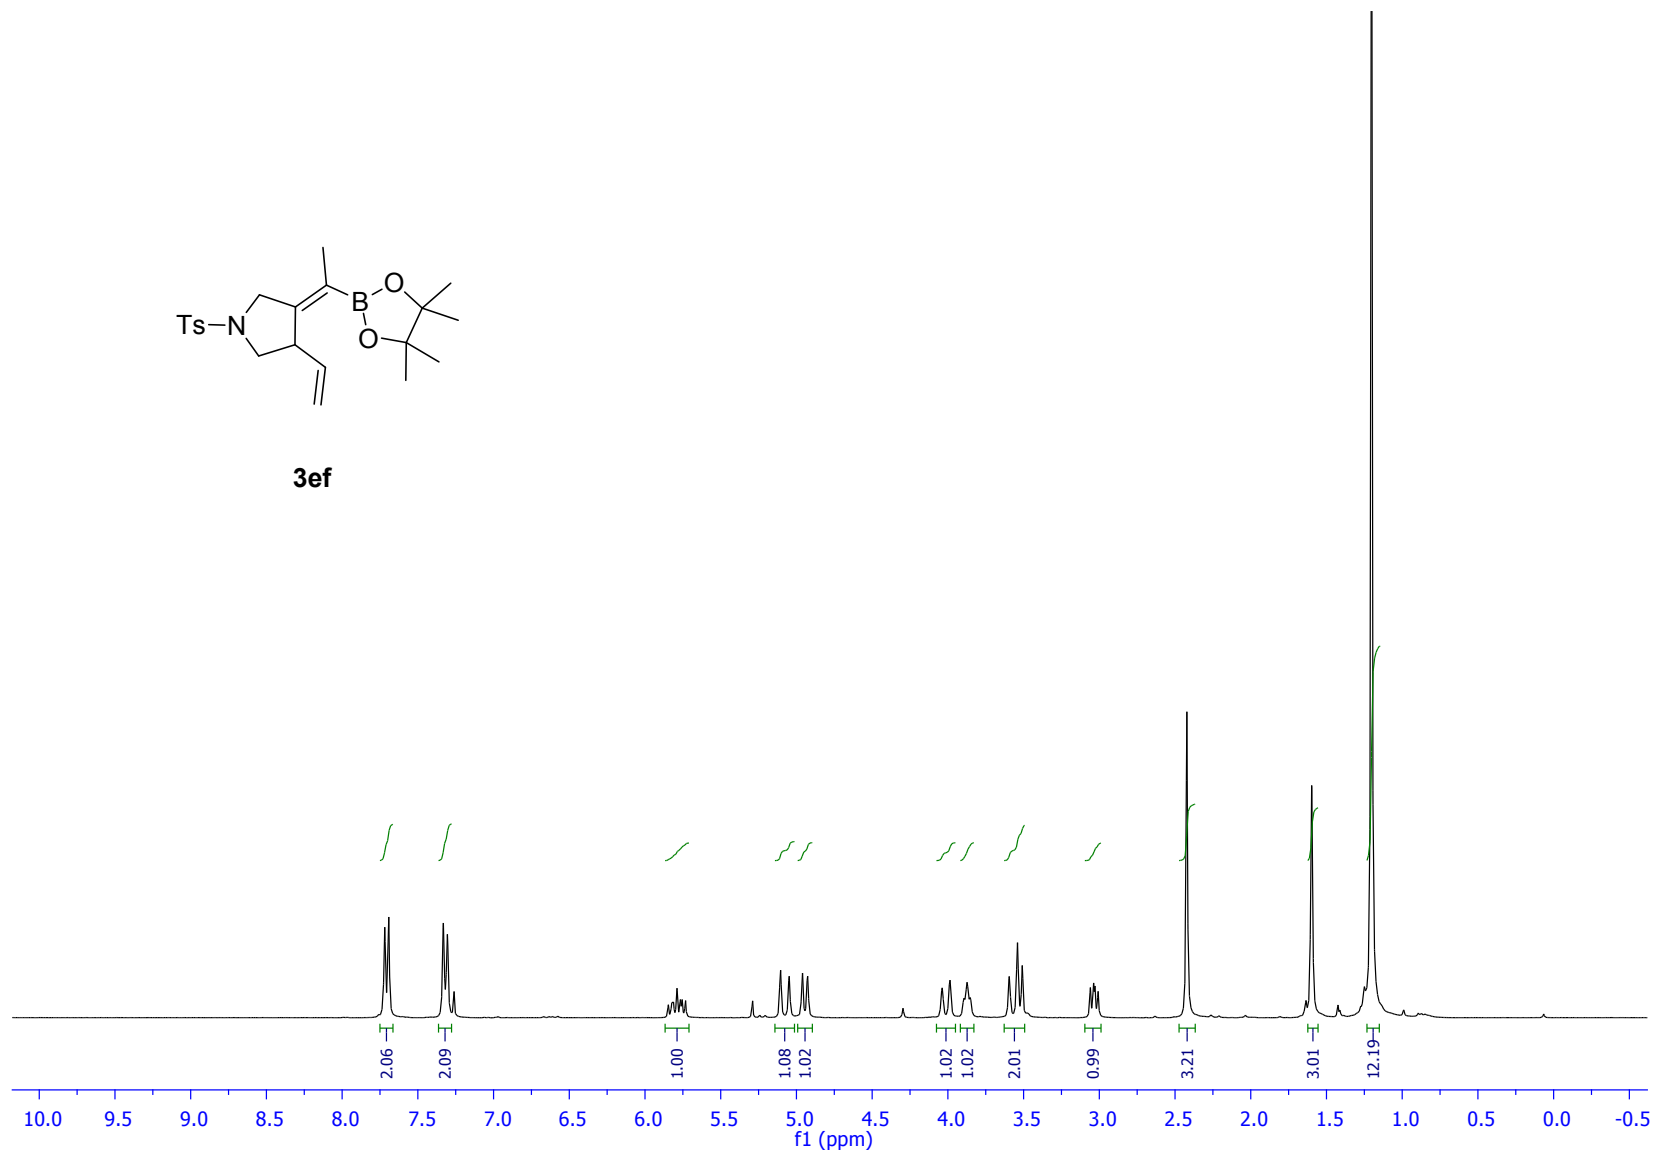

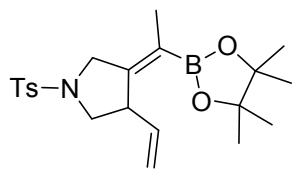

**3ef**

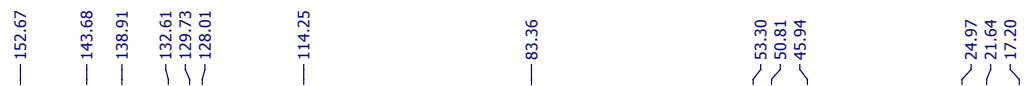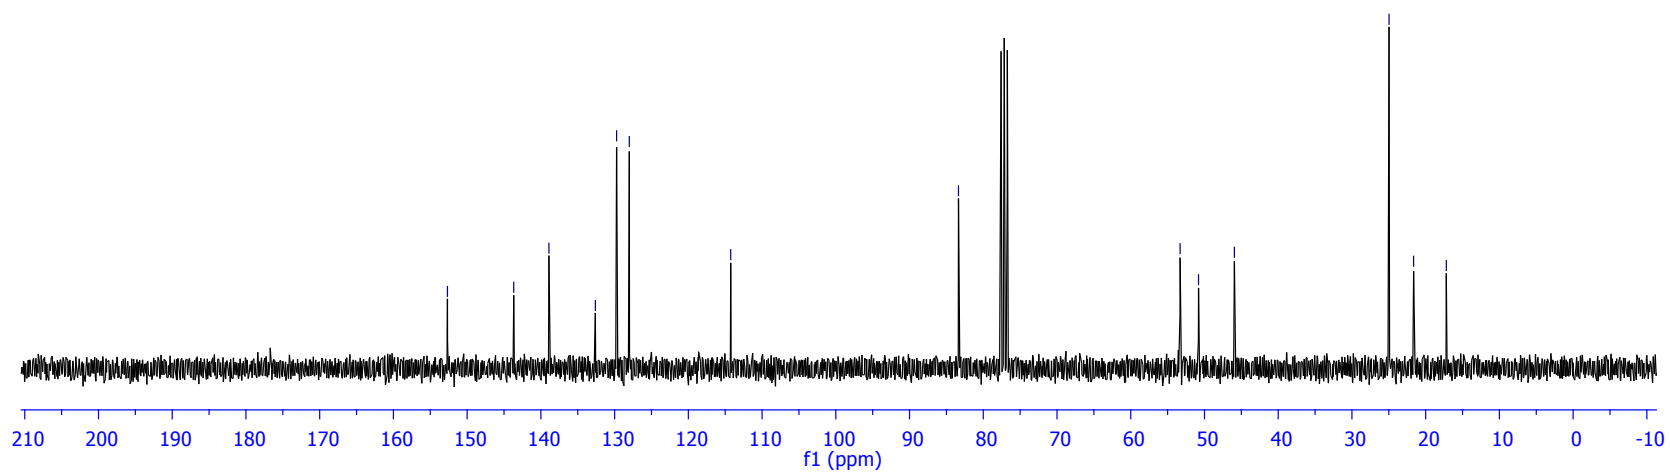

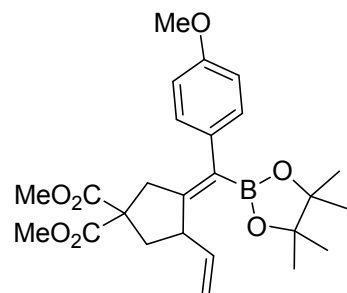

3mn

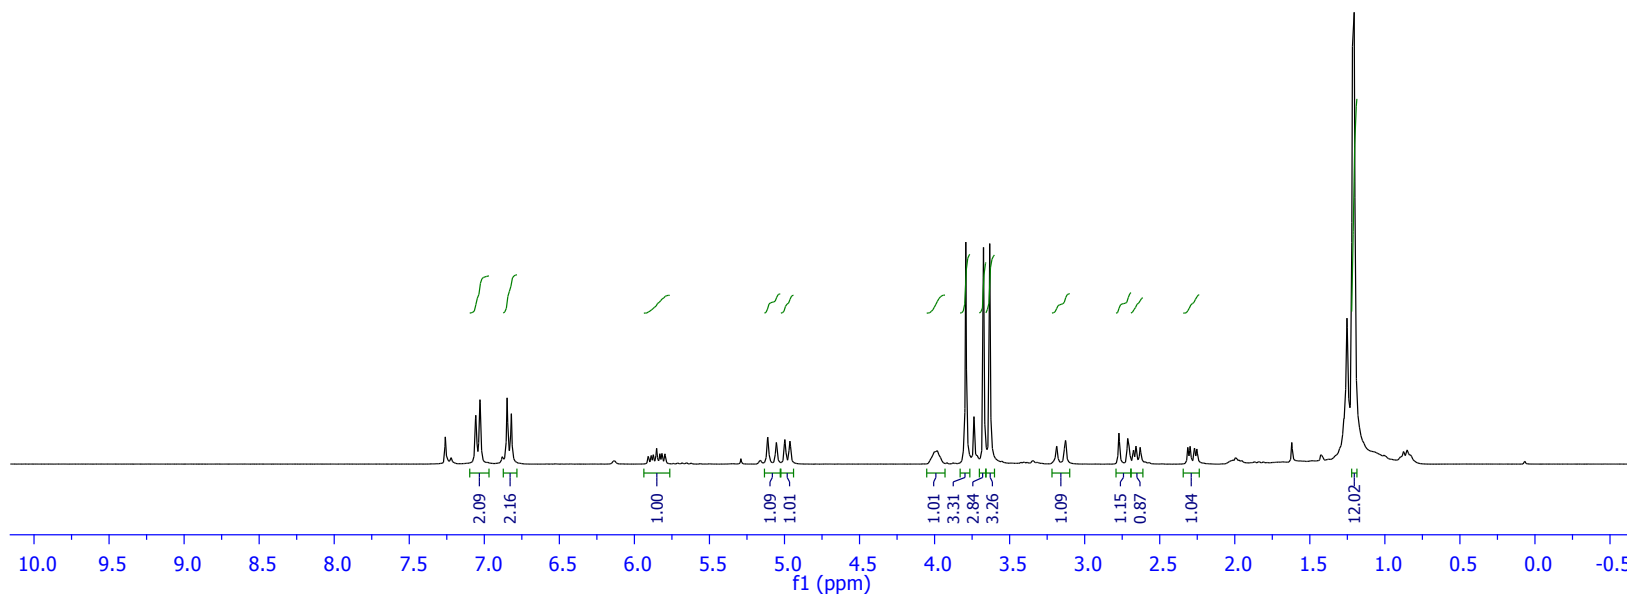



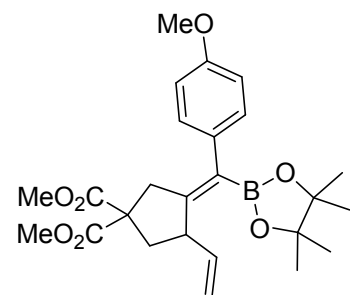

3mn

172.31  
172.22

157.78  
156.80

141.36

134.97

129.79

114.09  
113.48

83.33

58.72

55.26

52.82

46.13

40.21

39.50

25.05

24.85

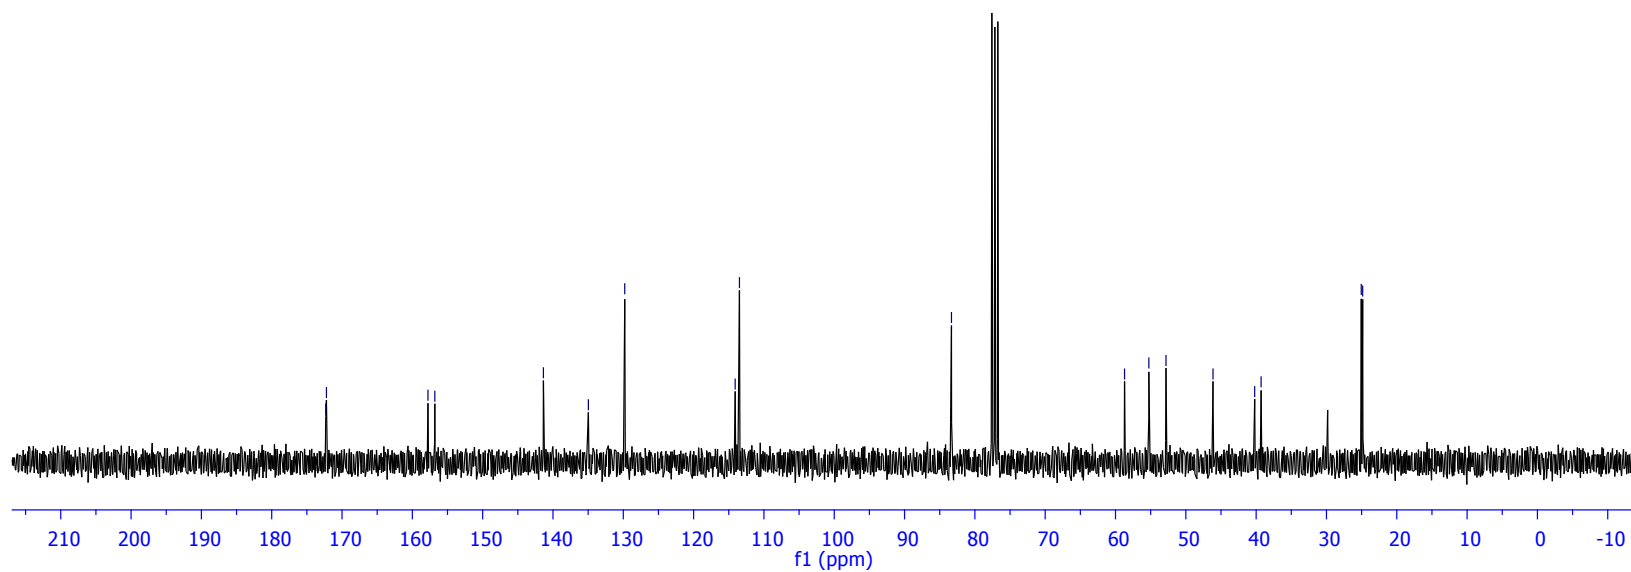

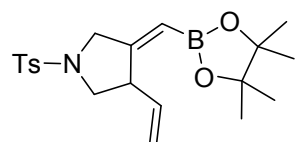

**3o**

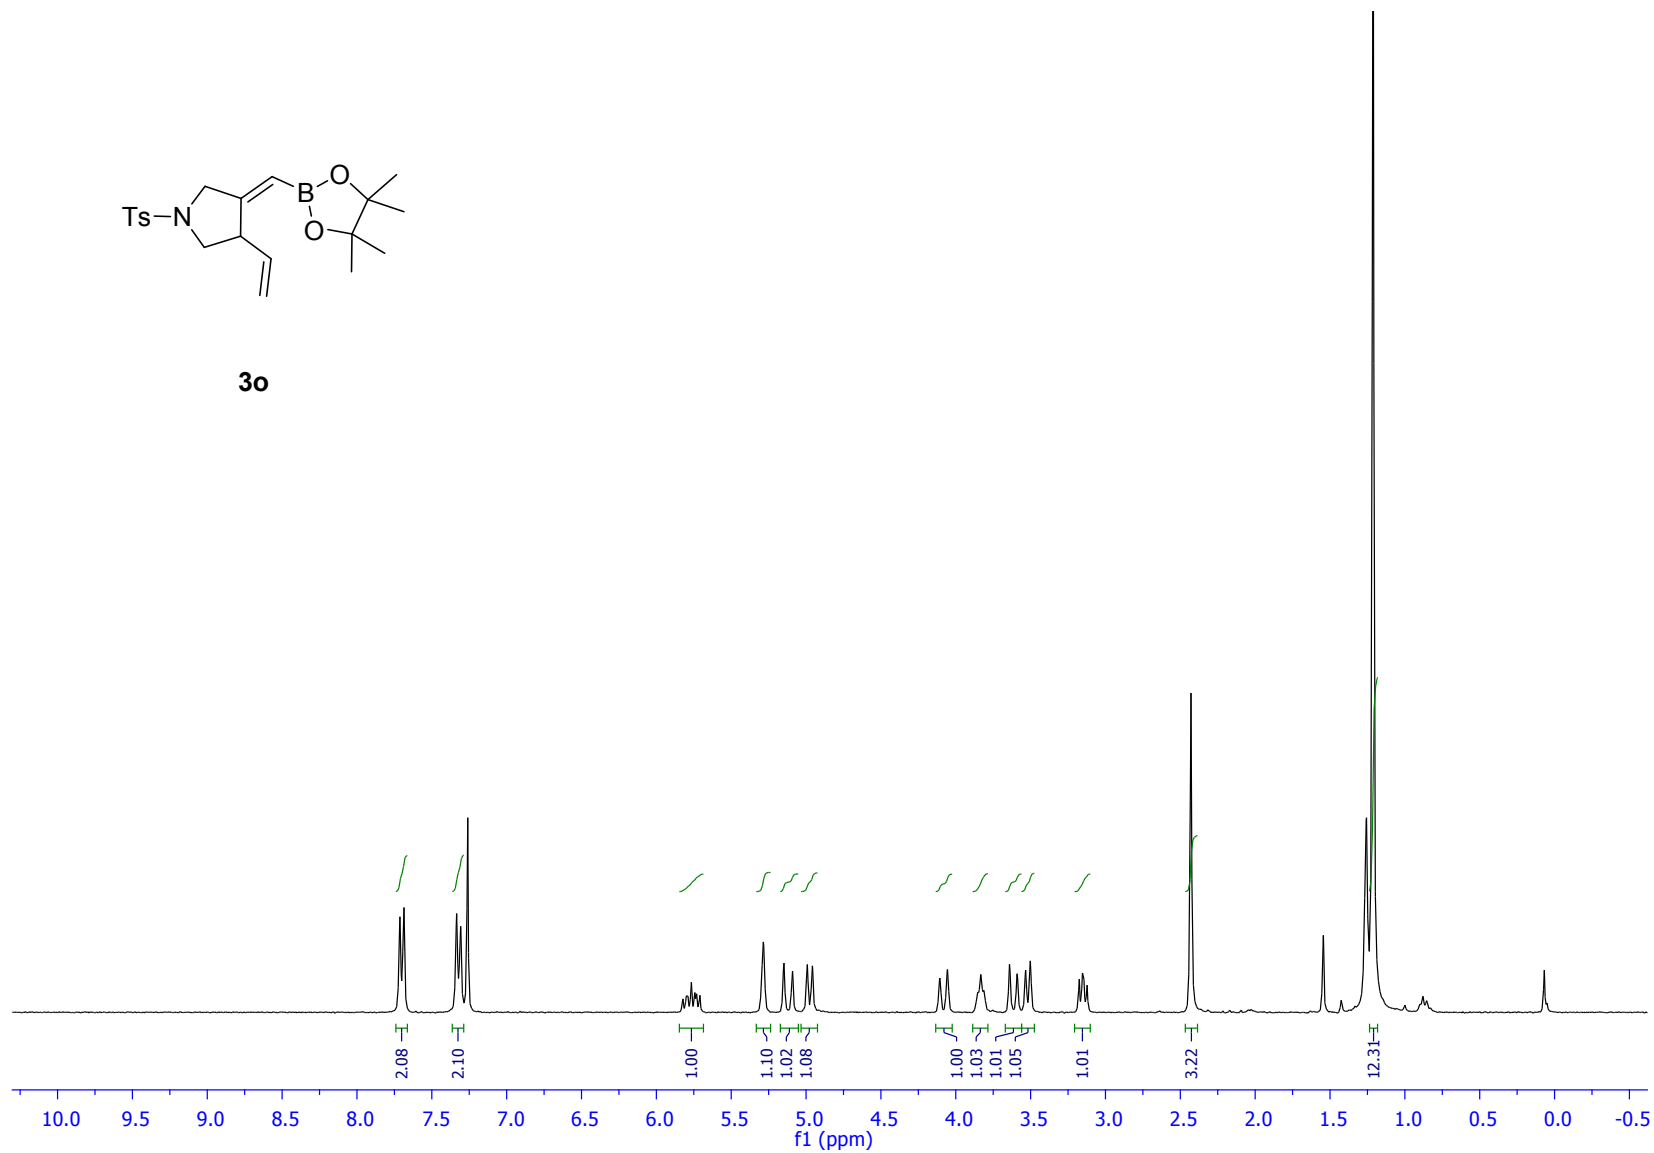

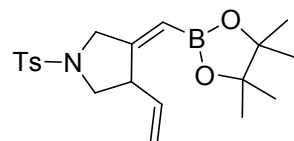

**3o**

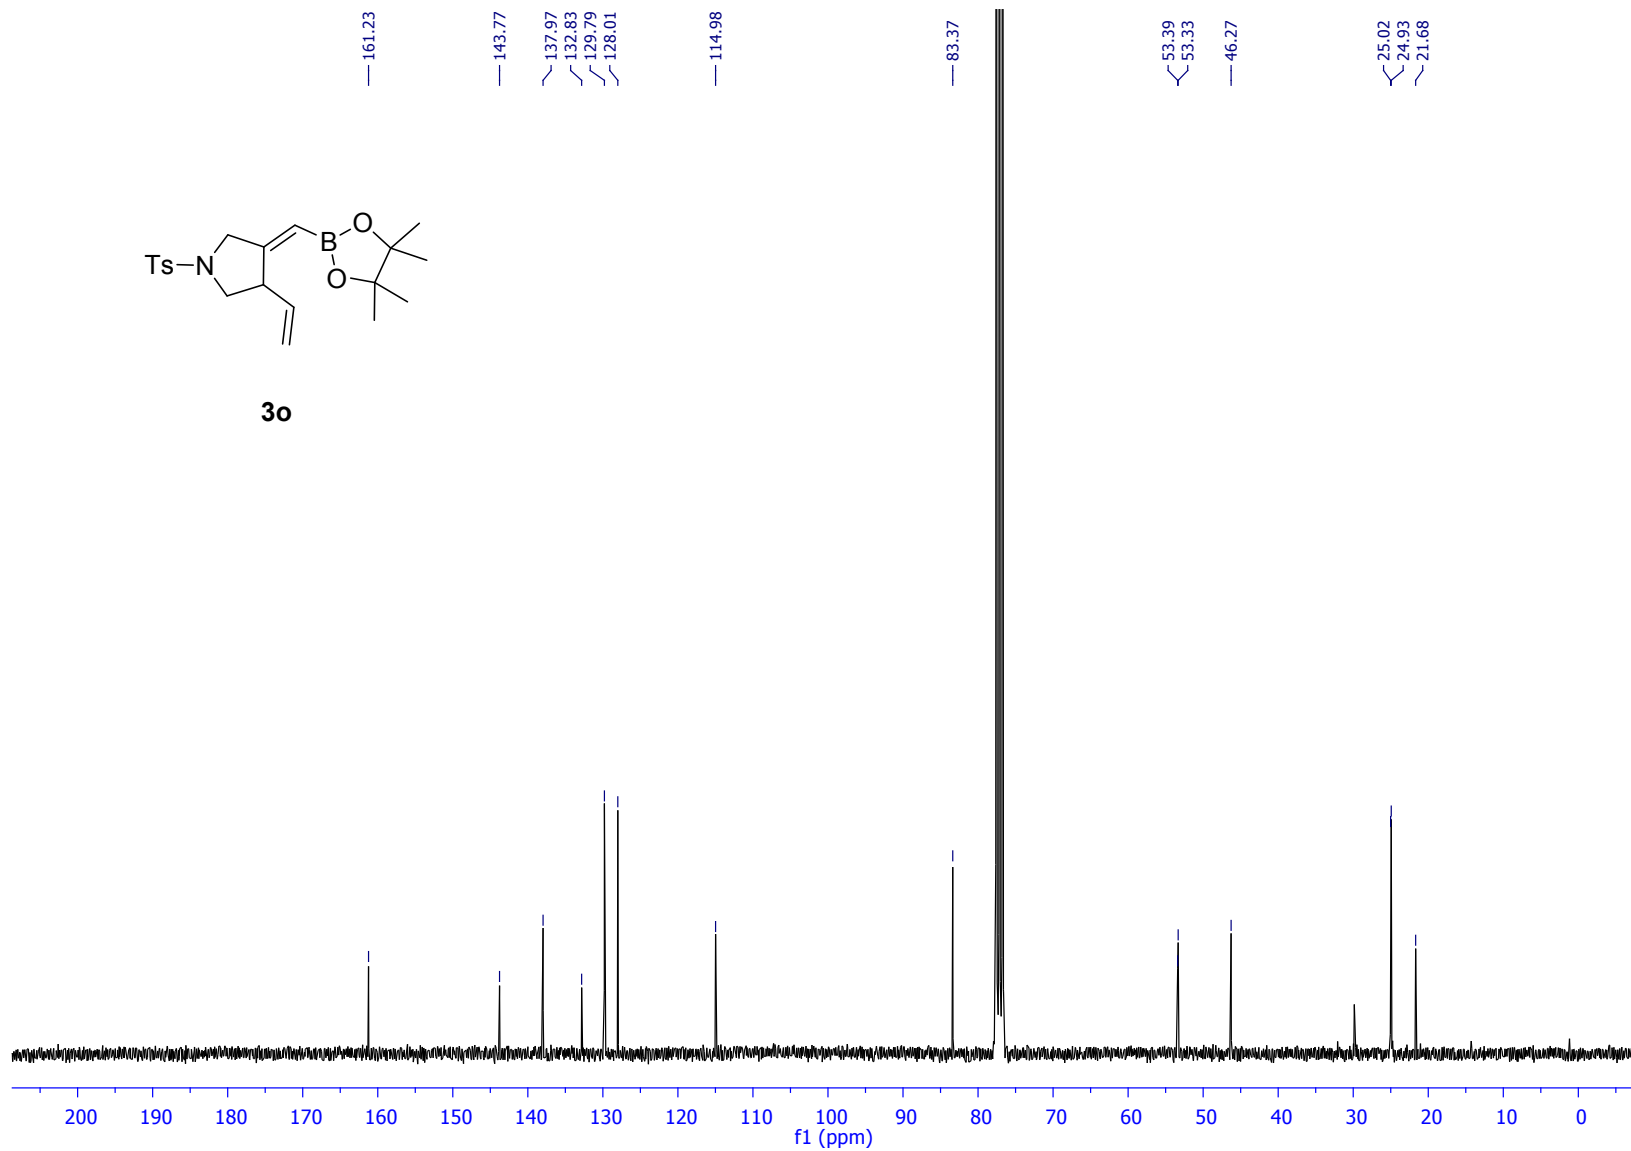

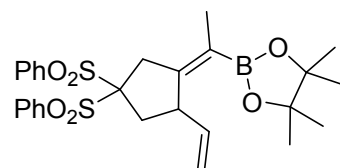

3p

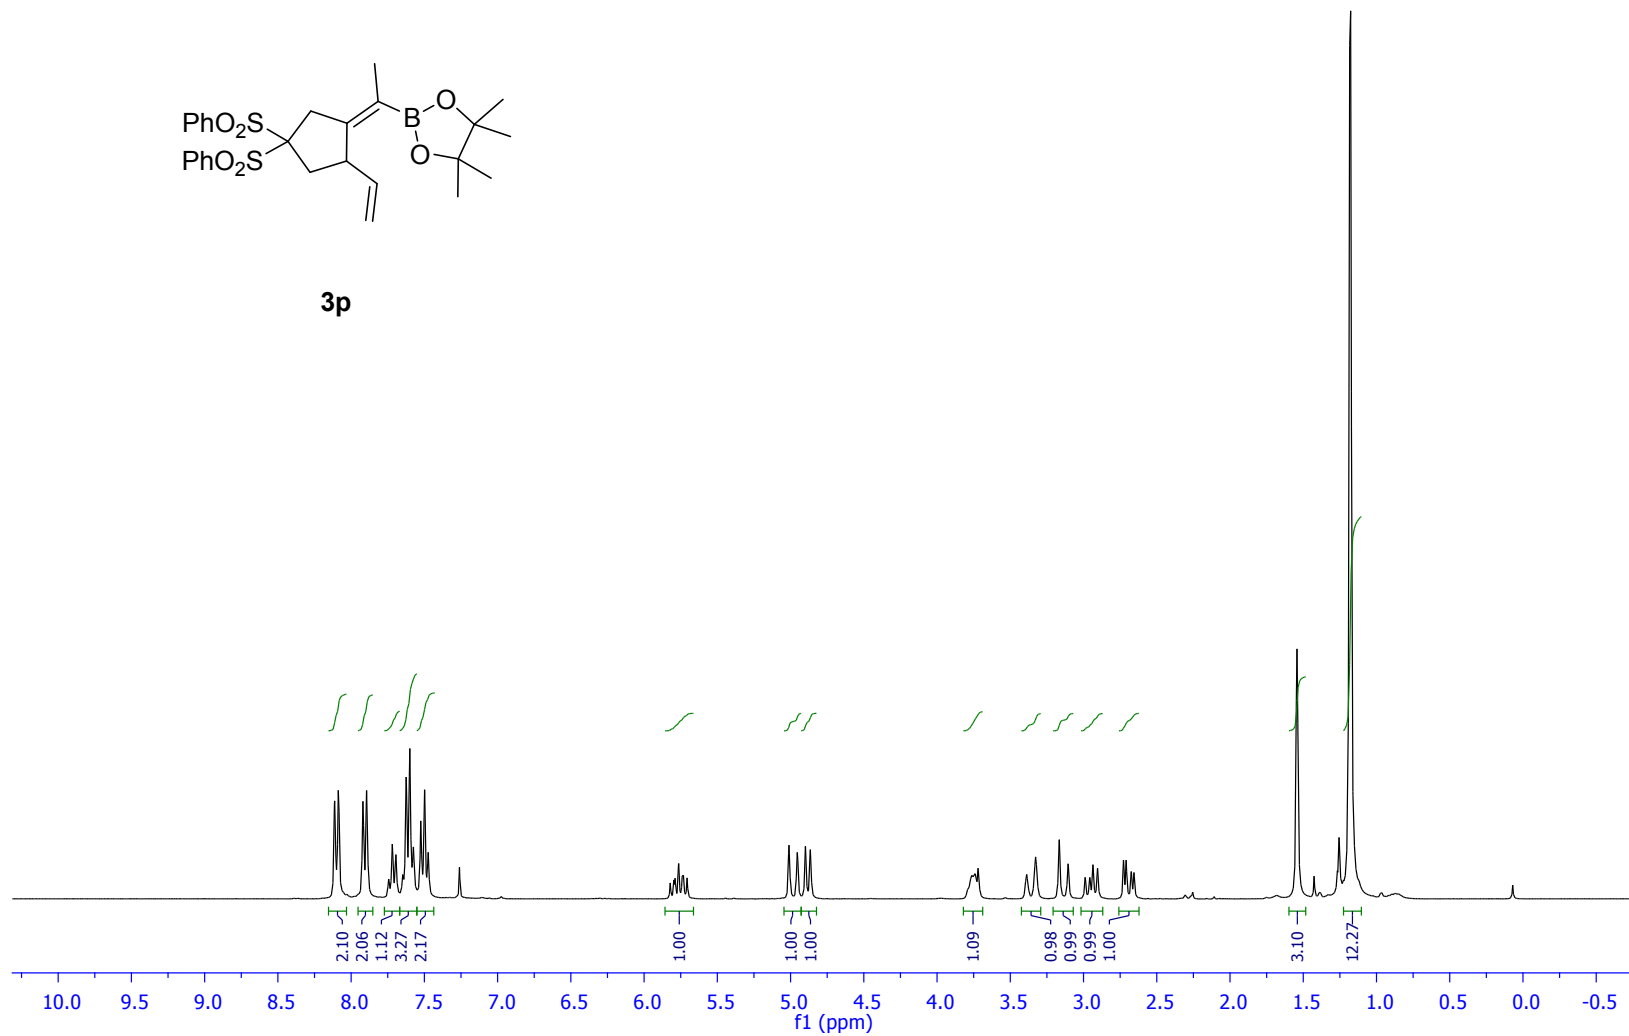



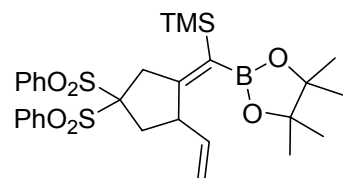

3q

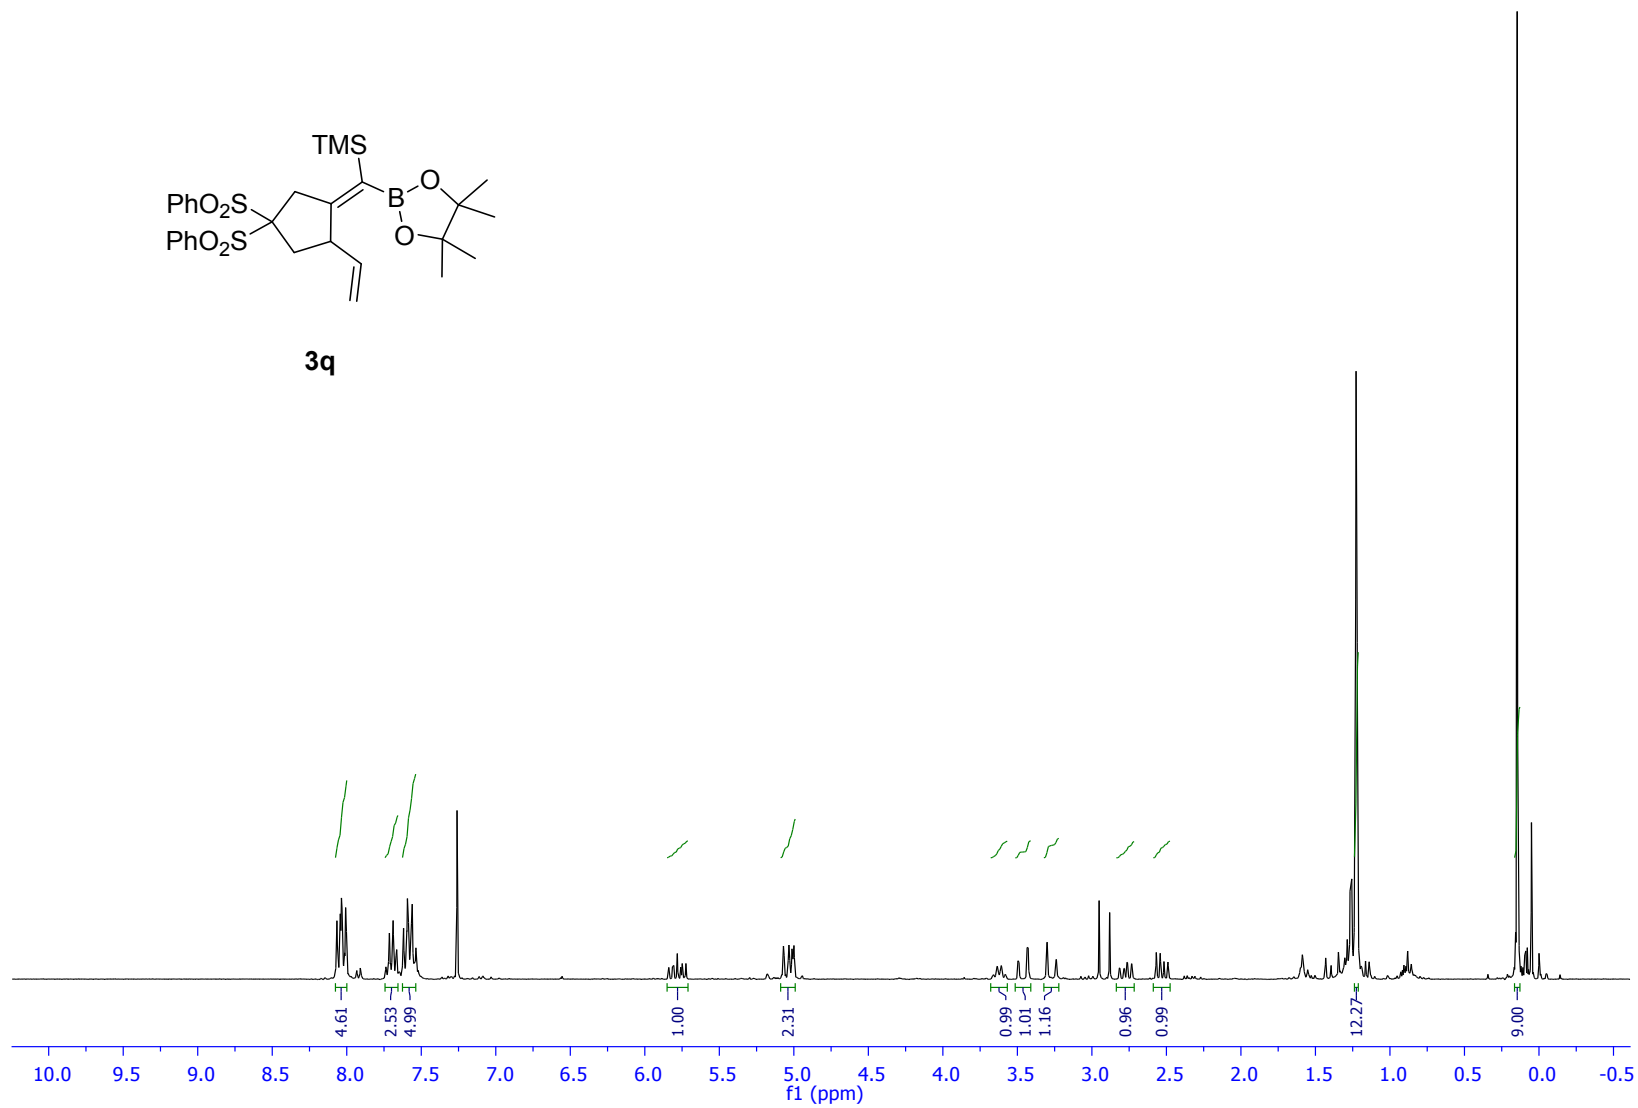

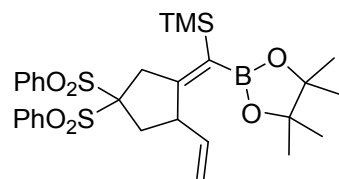

3q

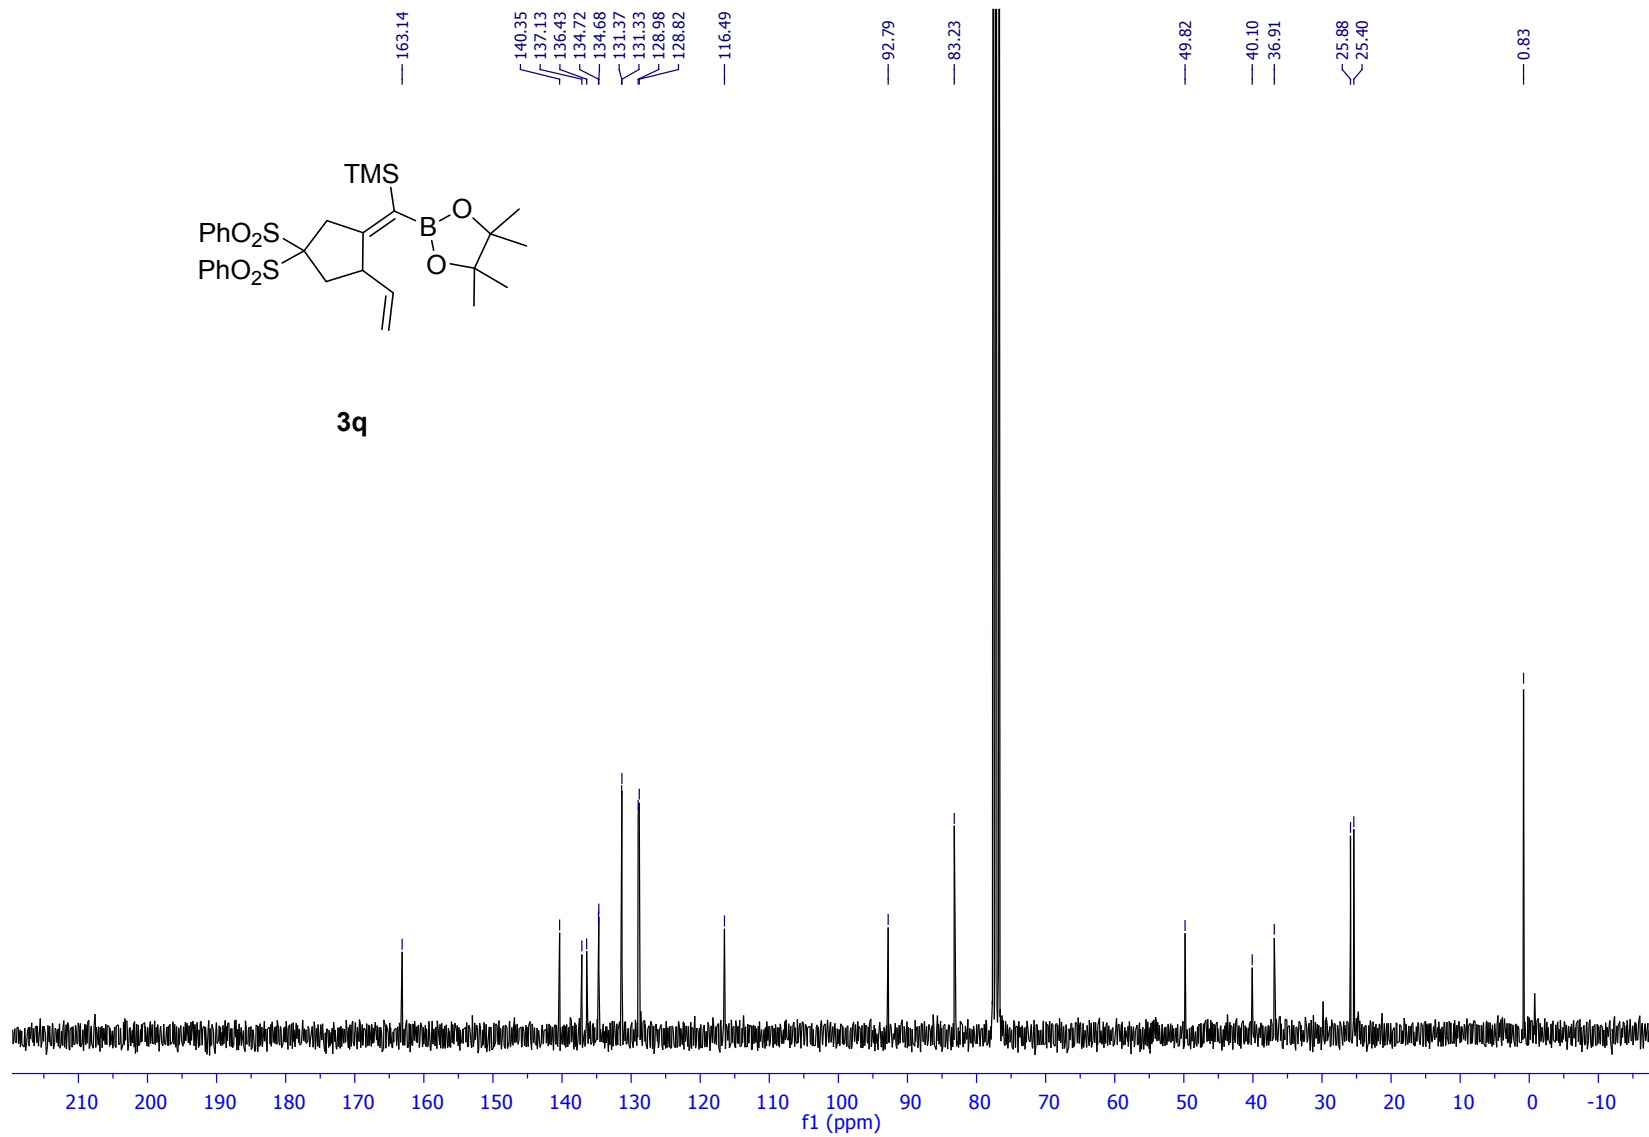

$^1\text{H-NMR}$  and  $^{13}\text{C-NMR}$  spectra of synthetic applications of allyl- and alkenylboronates

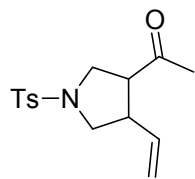

4

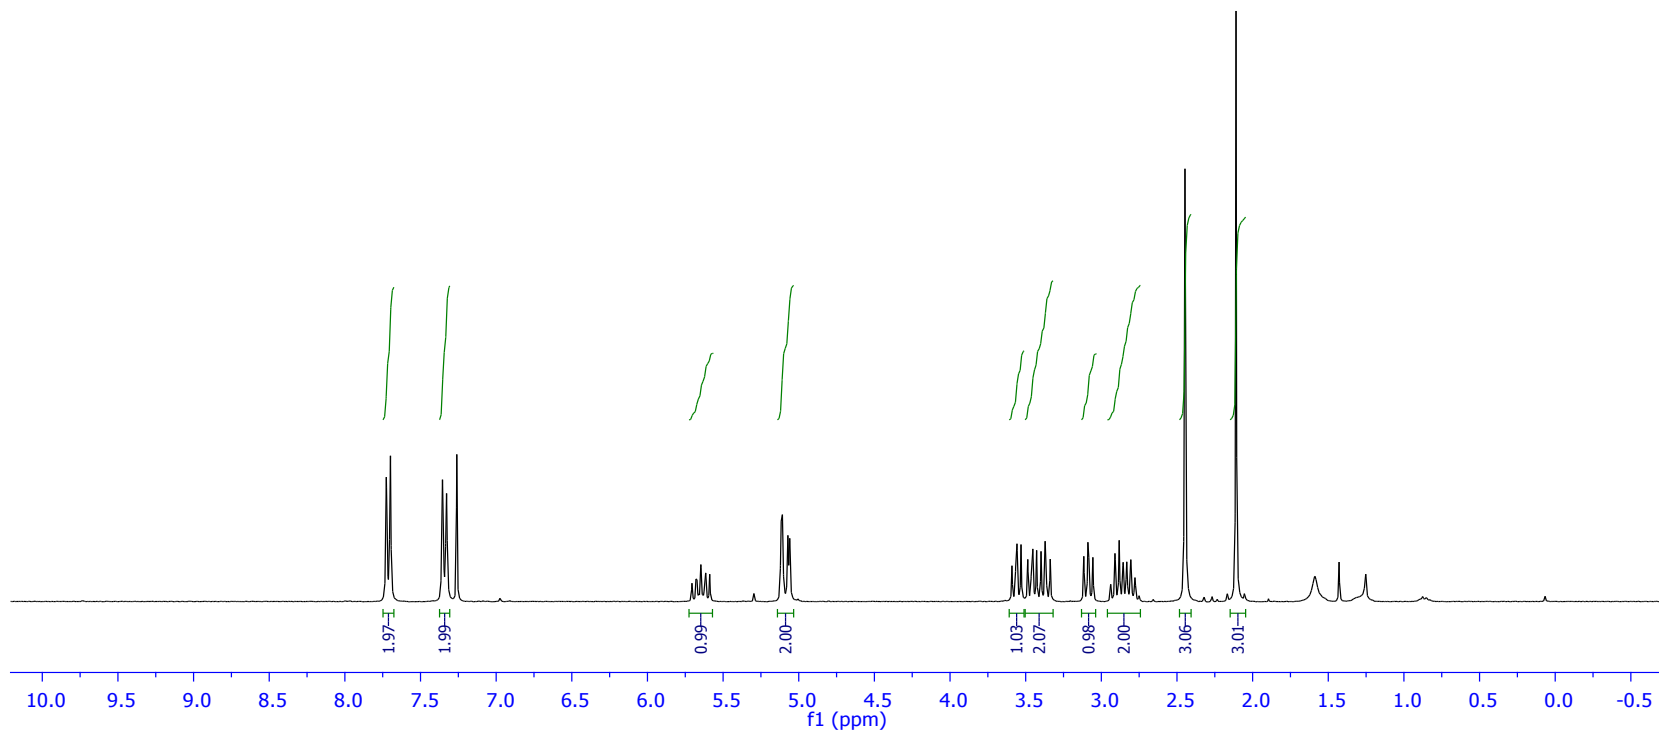



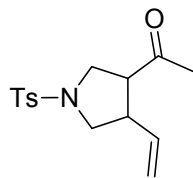

4

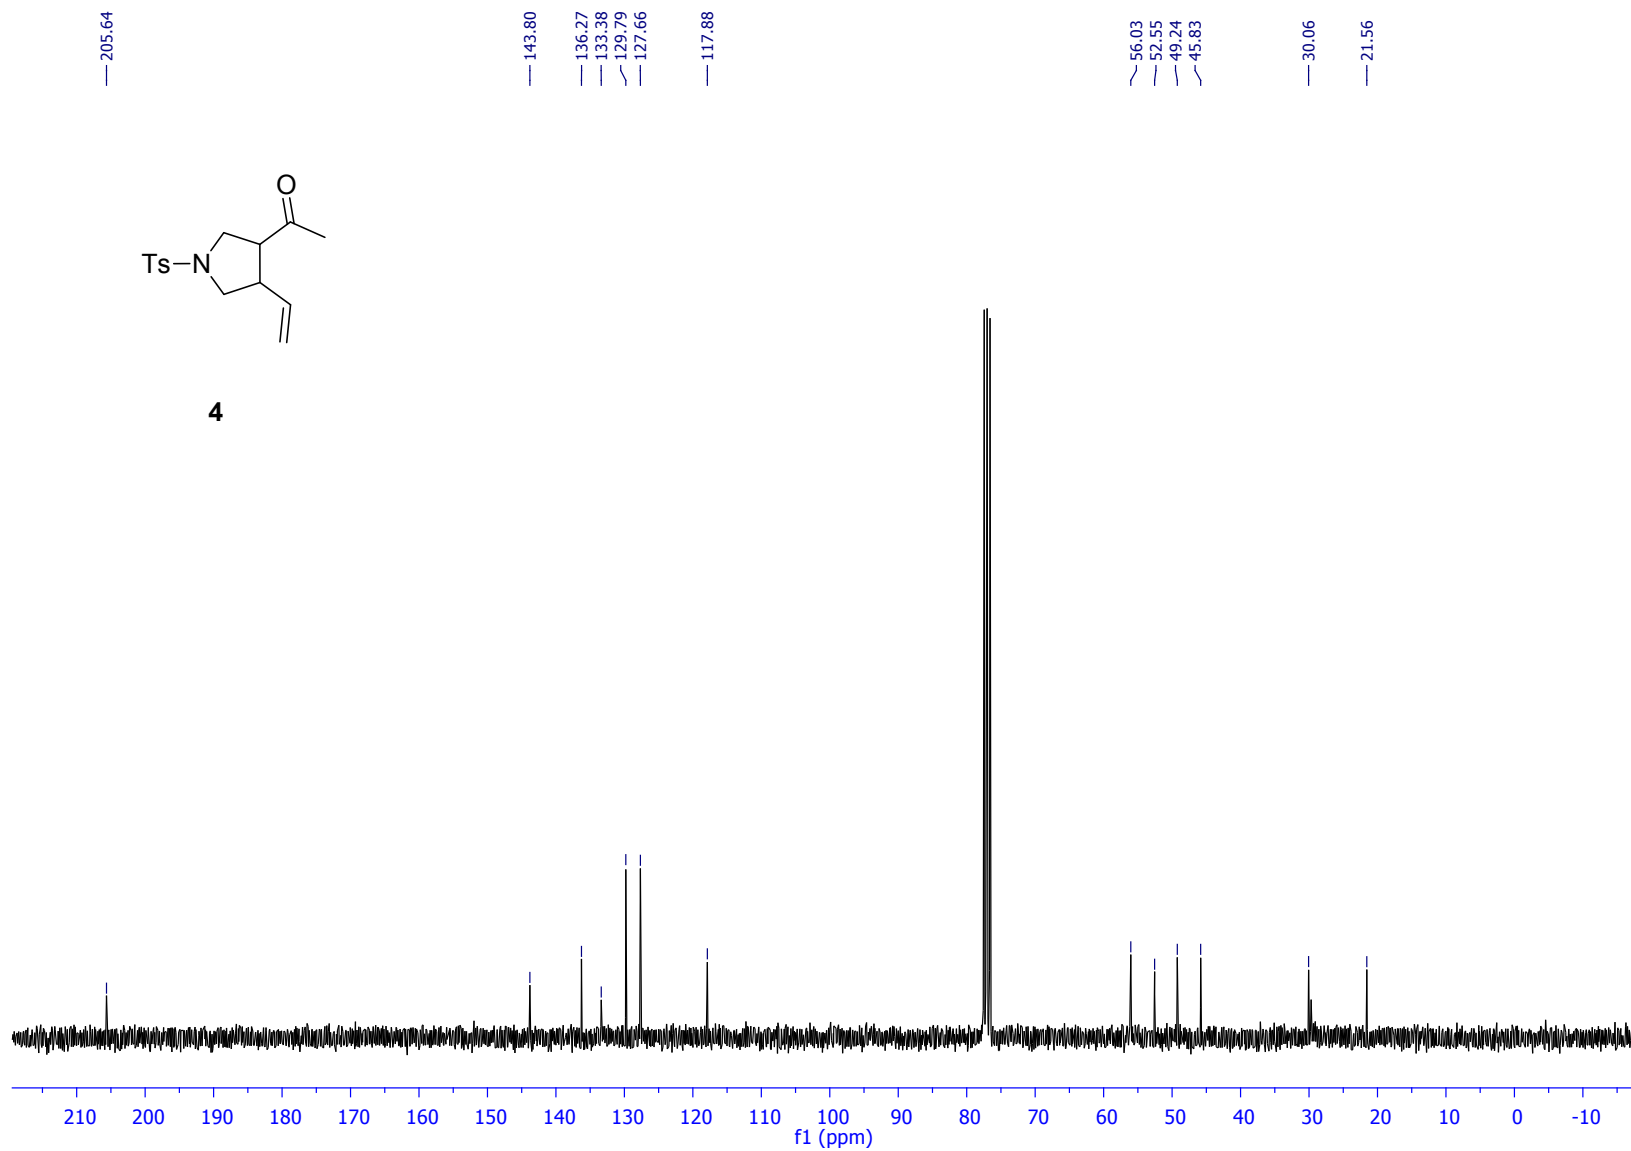

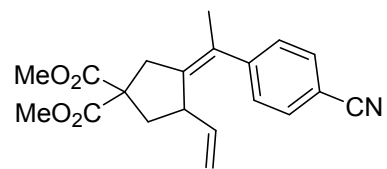

5ab

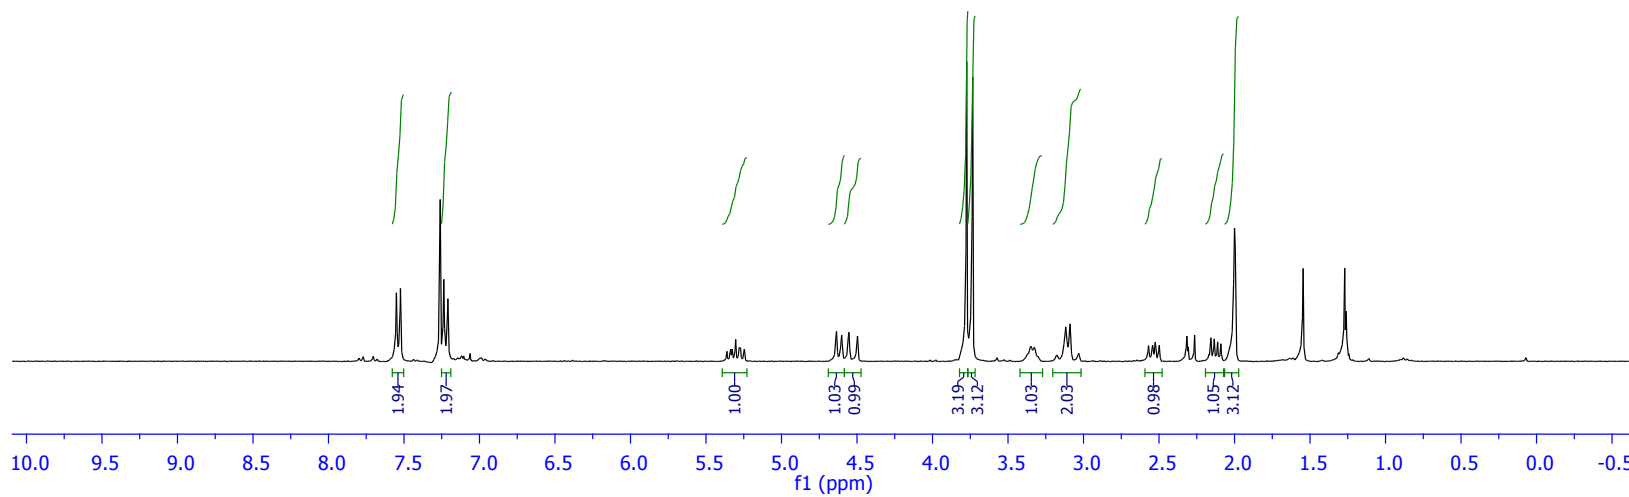

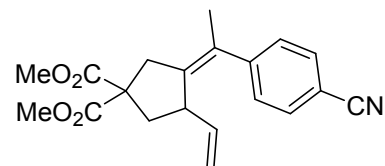

5ab

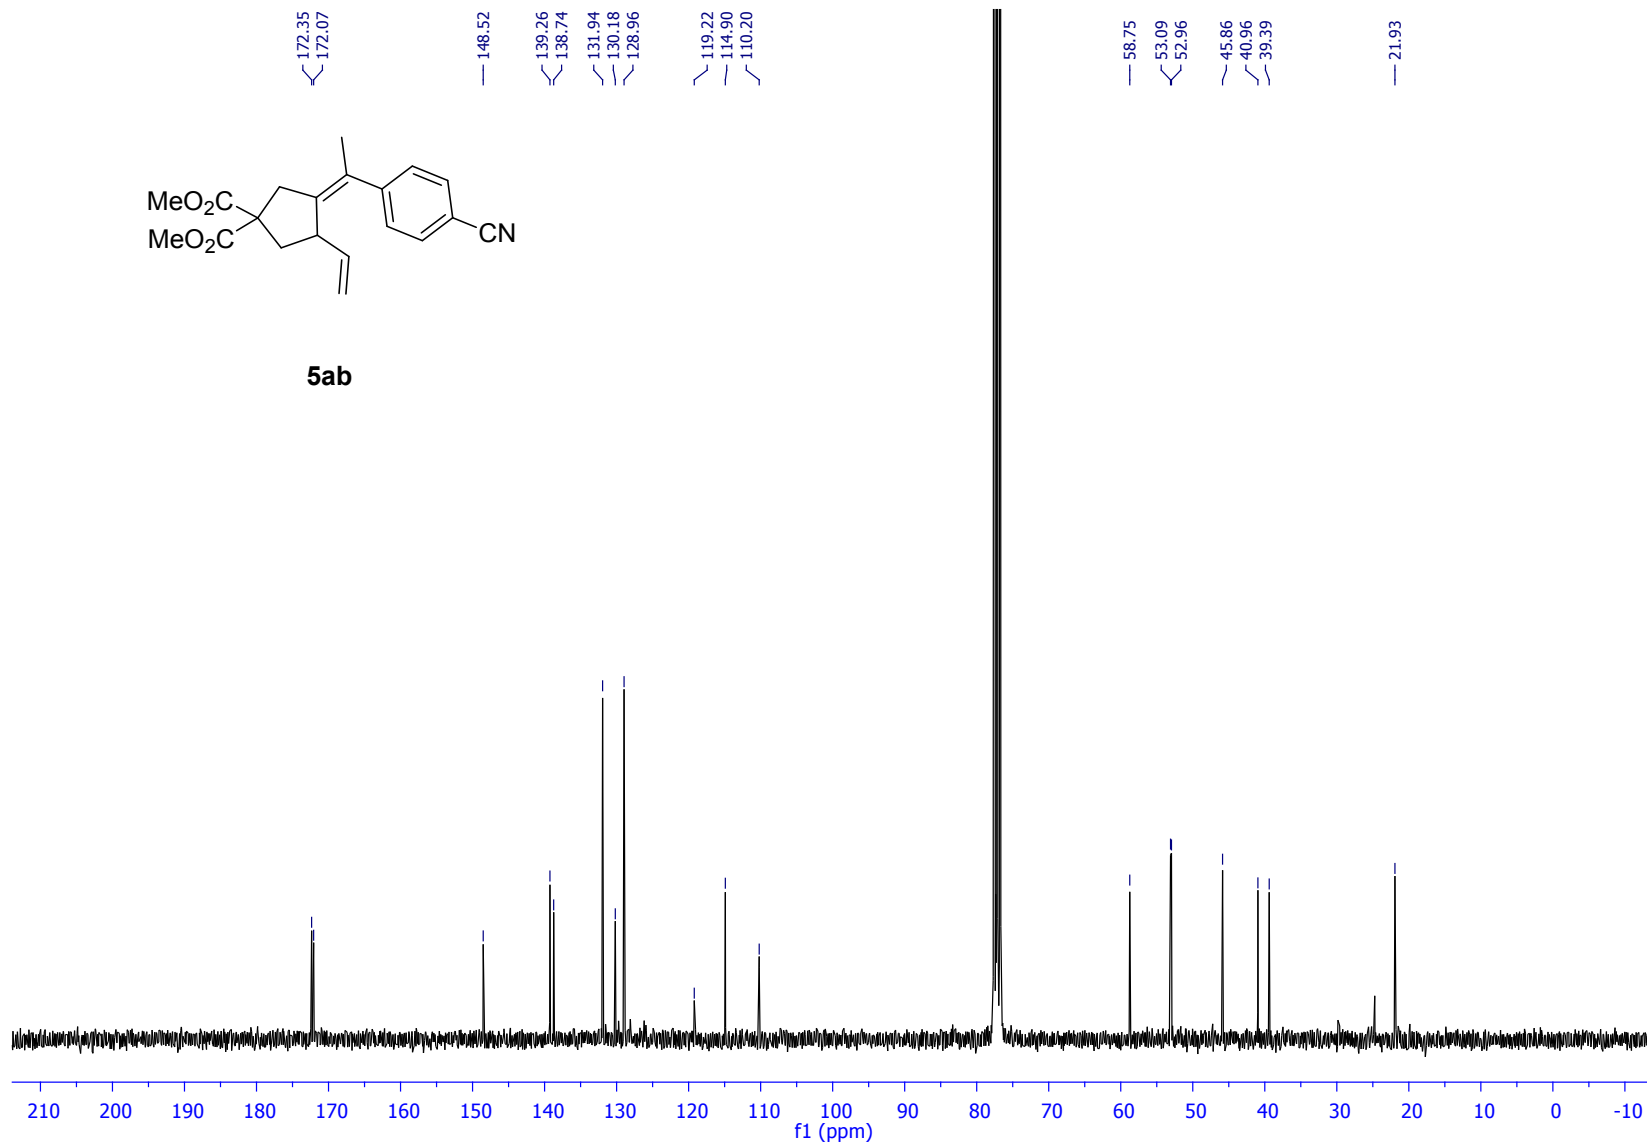

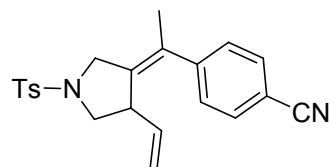

5ef

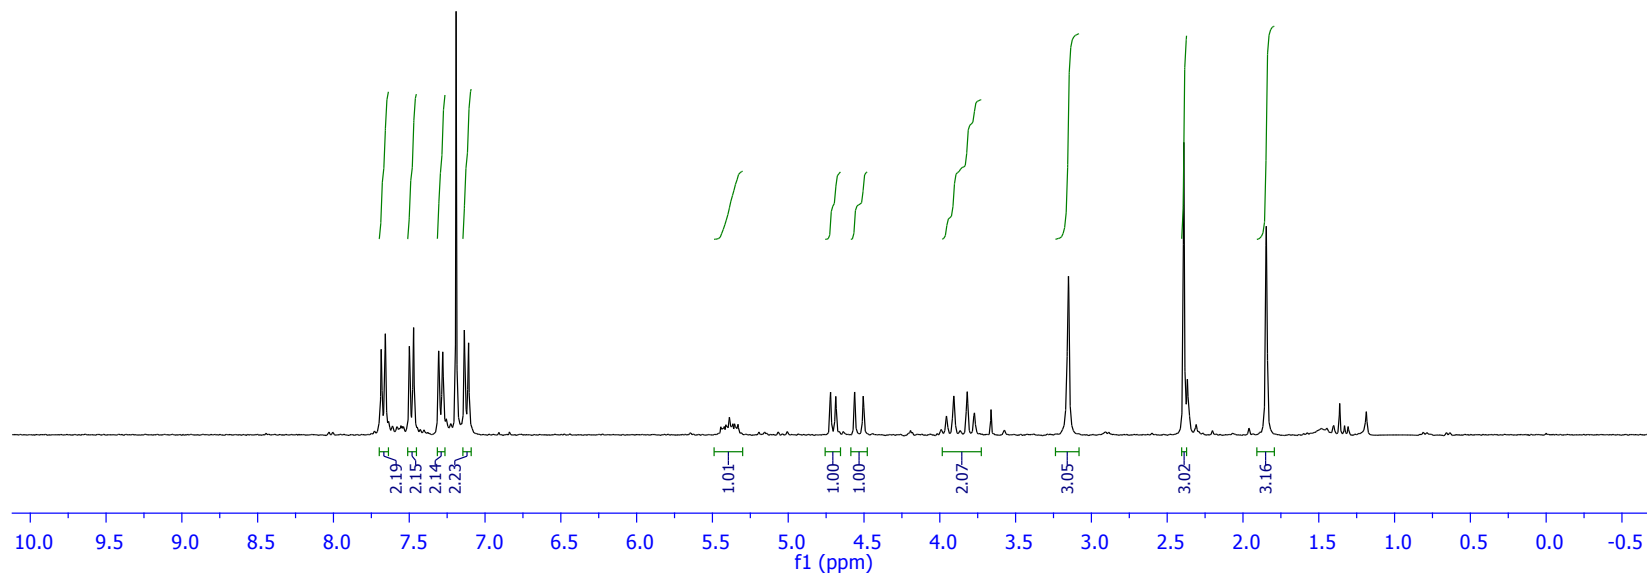

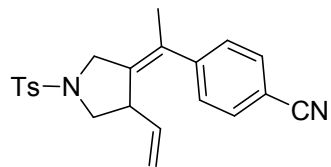

5ef

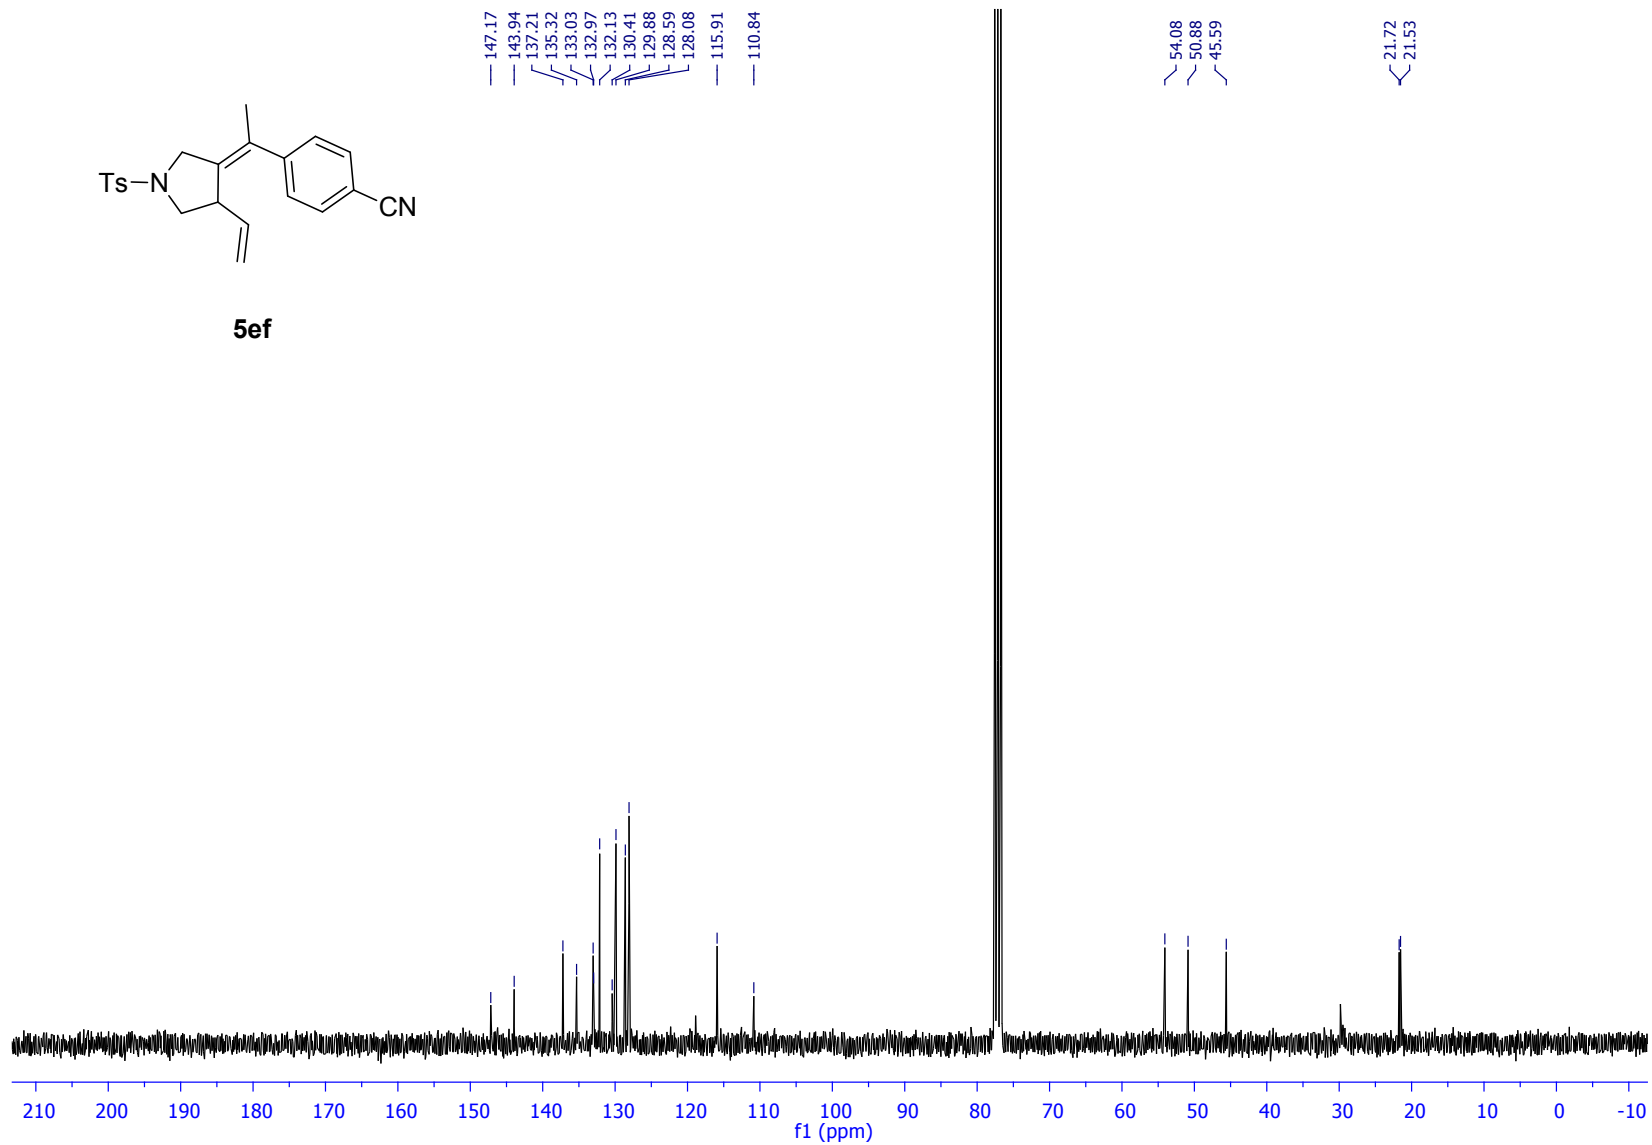

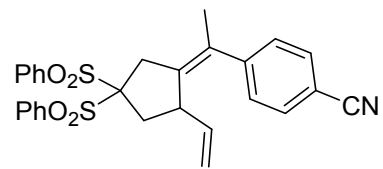

5p

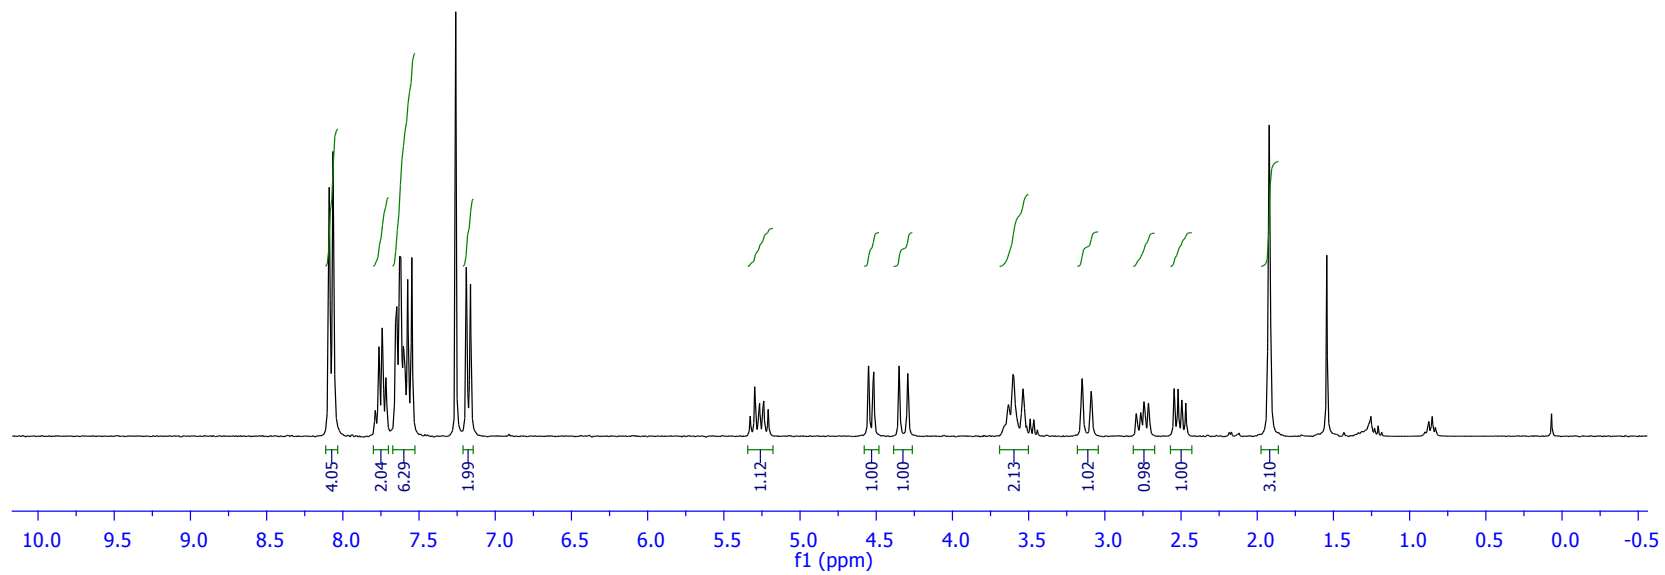

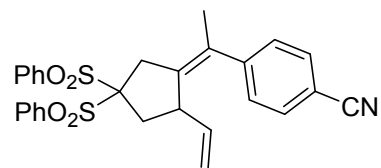

5p

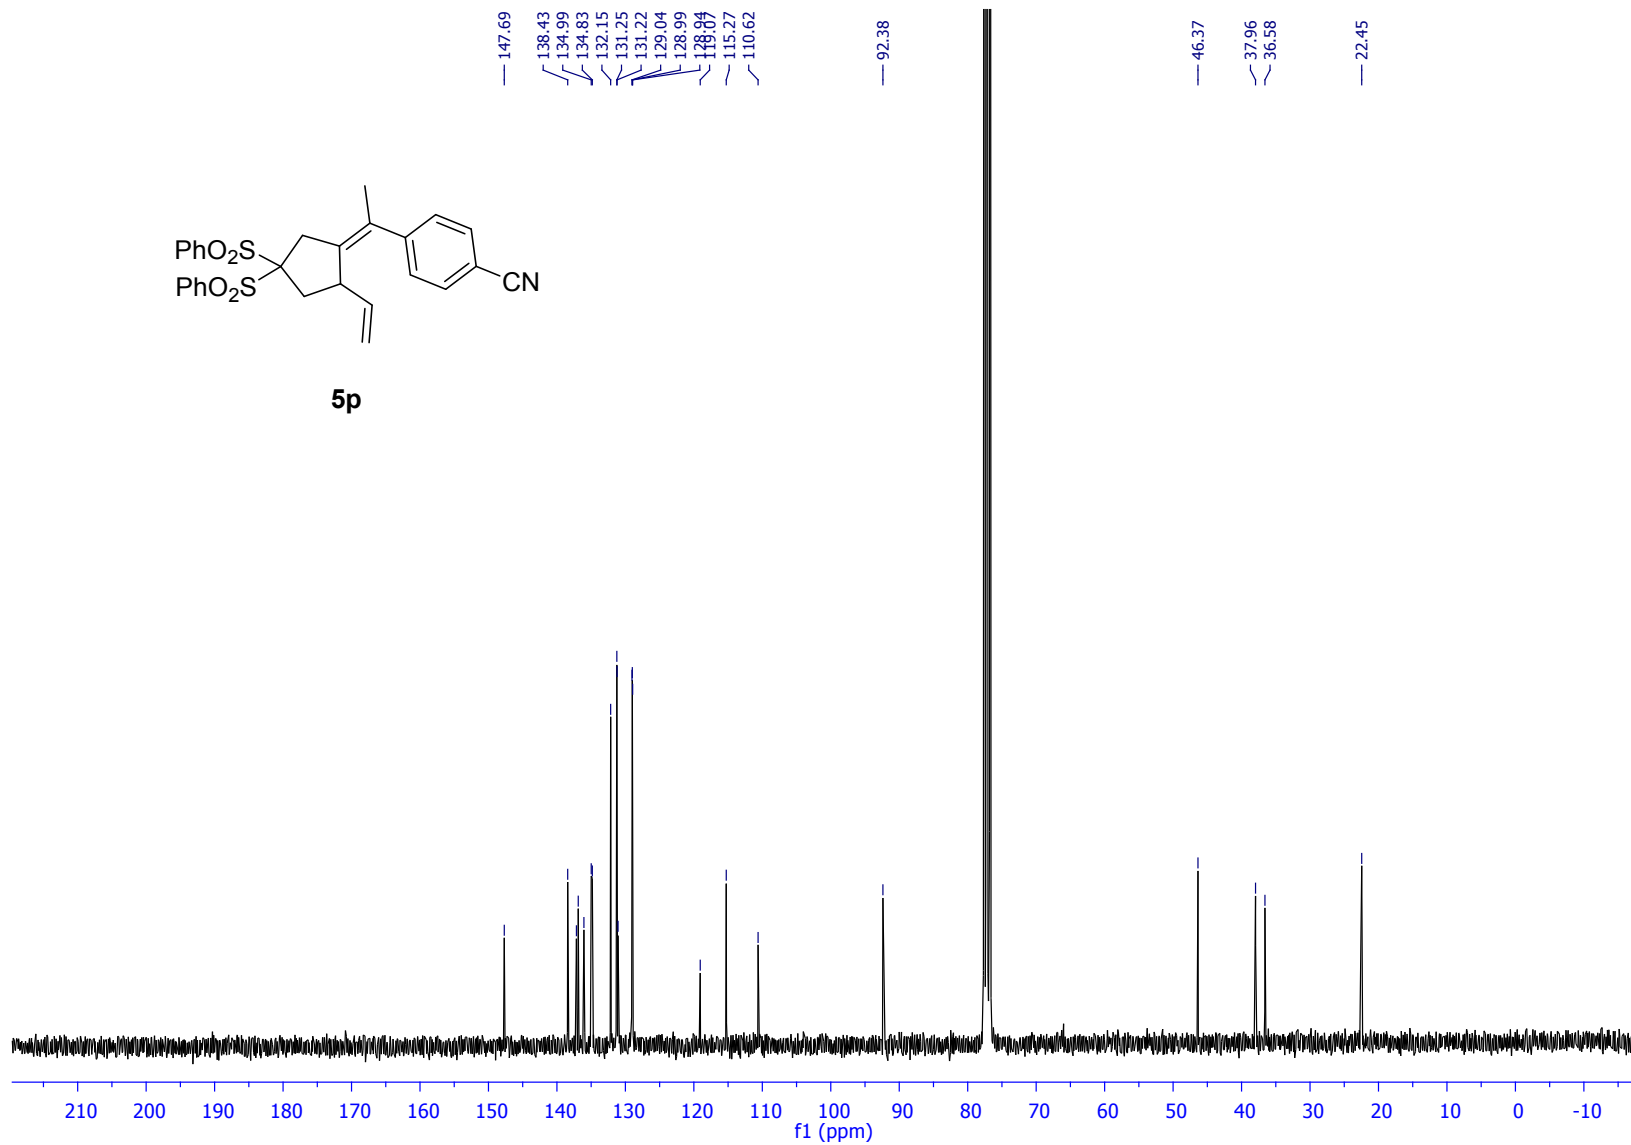

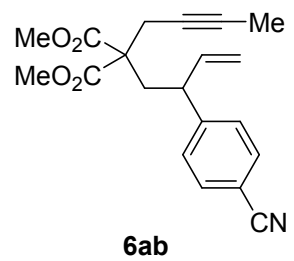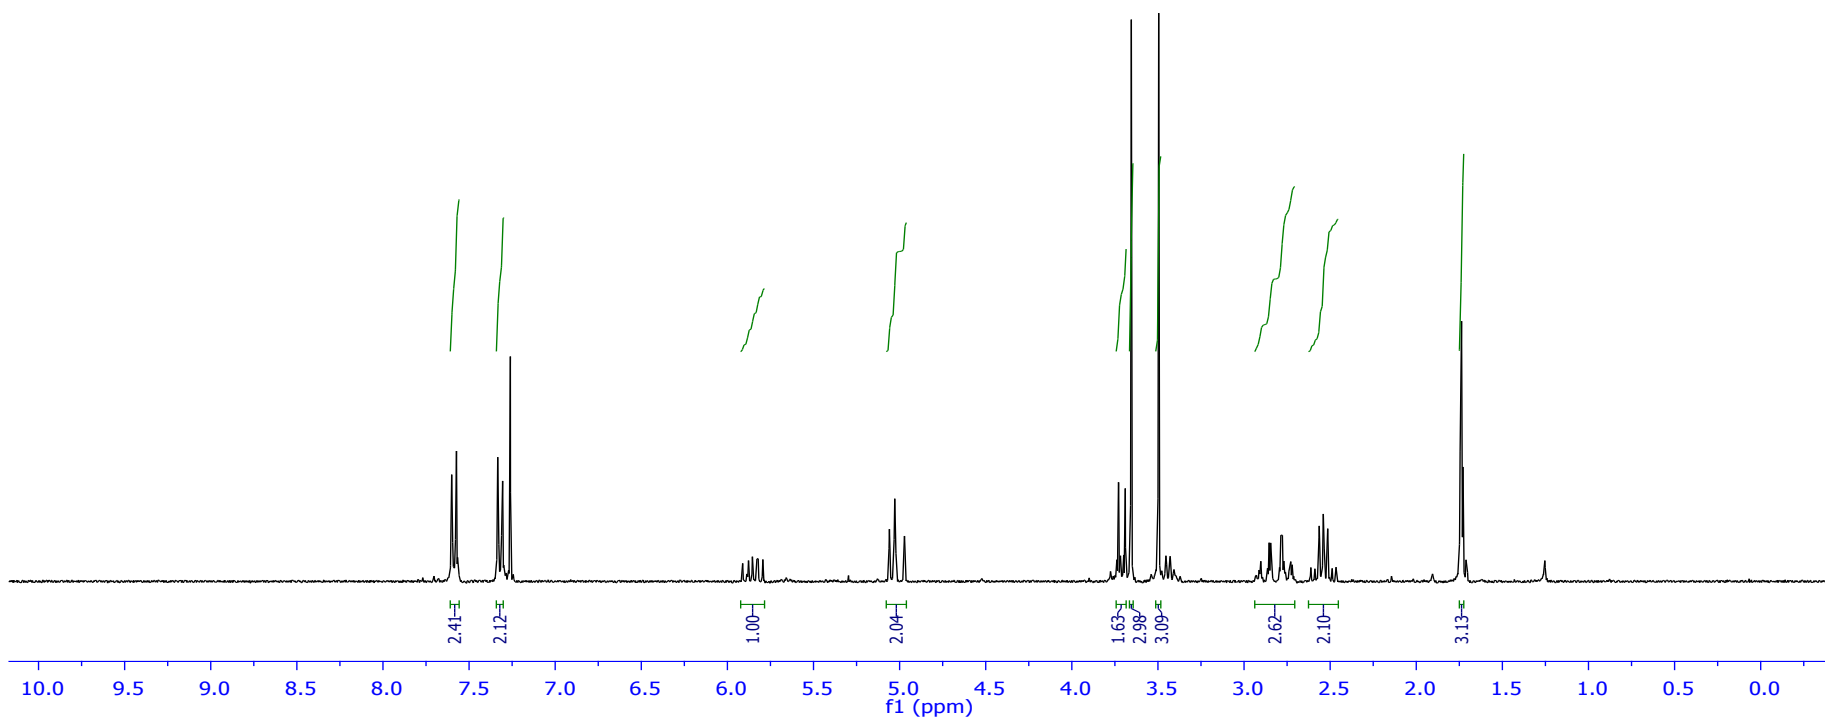

S104



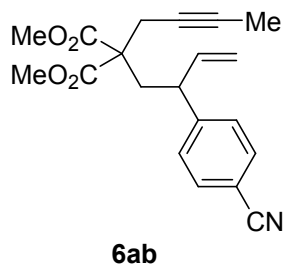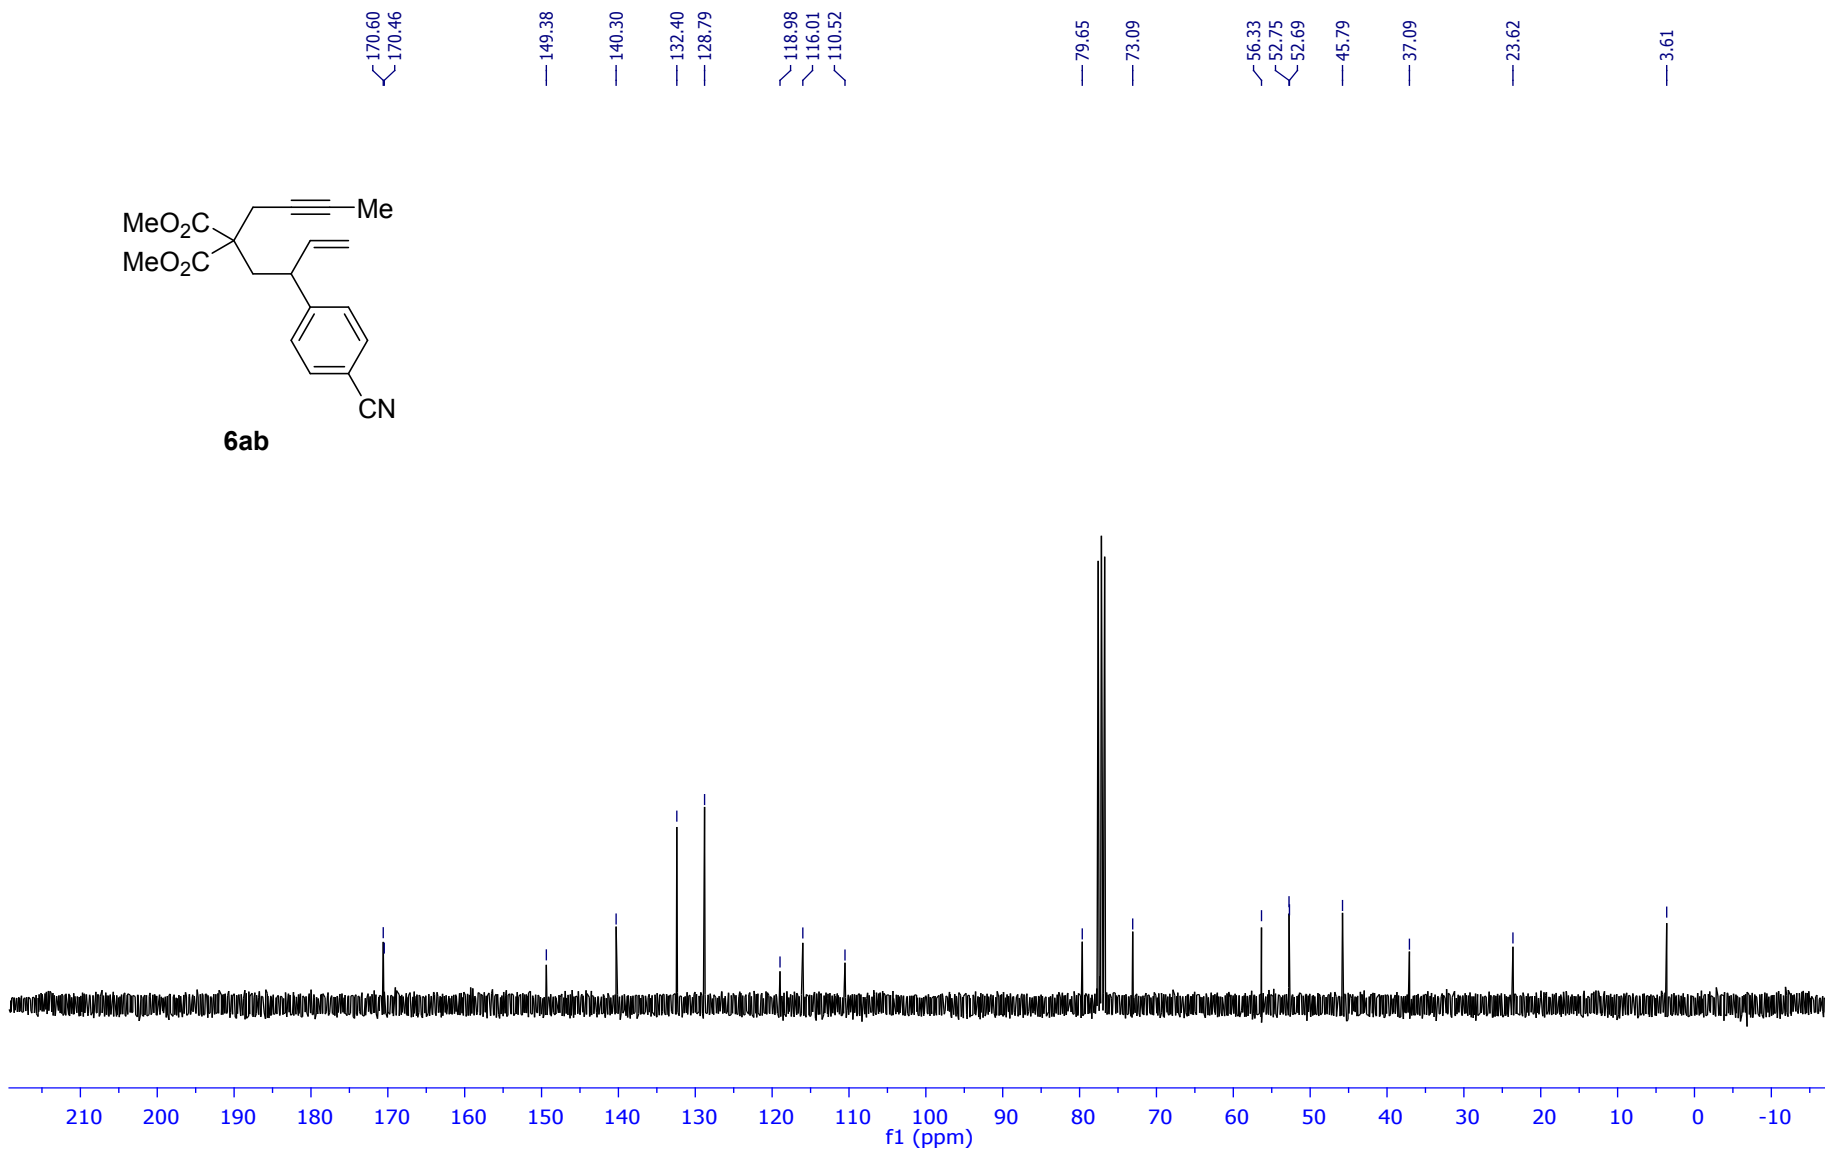

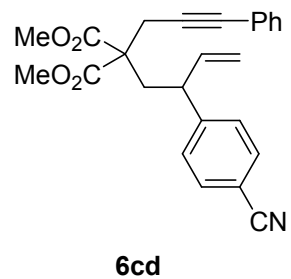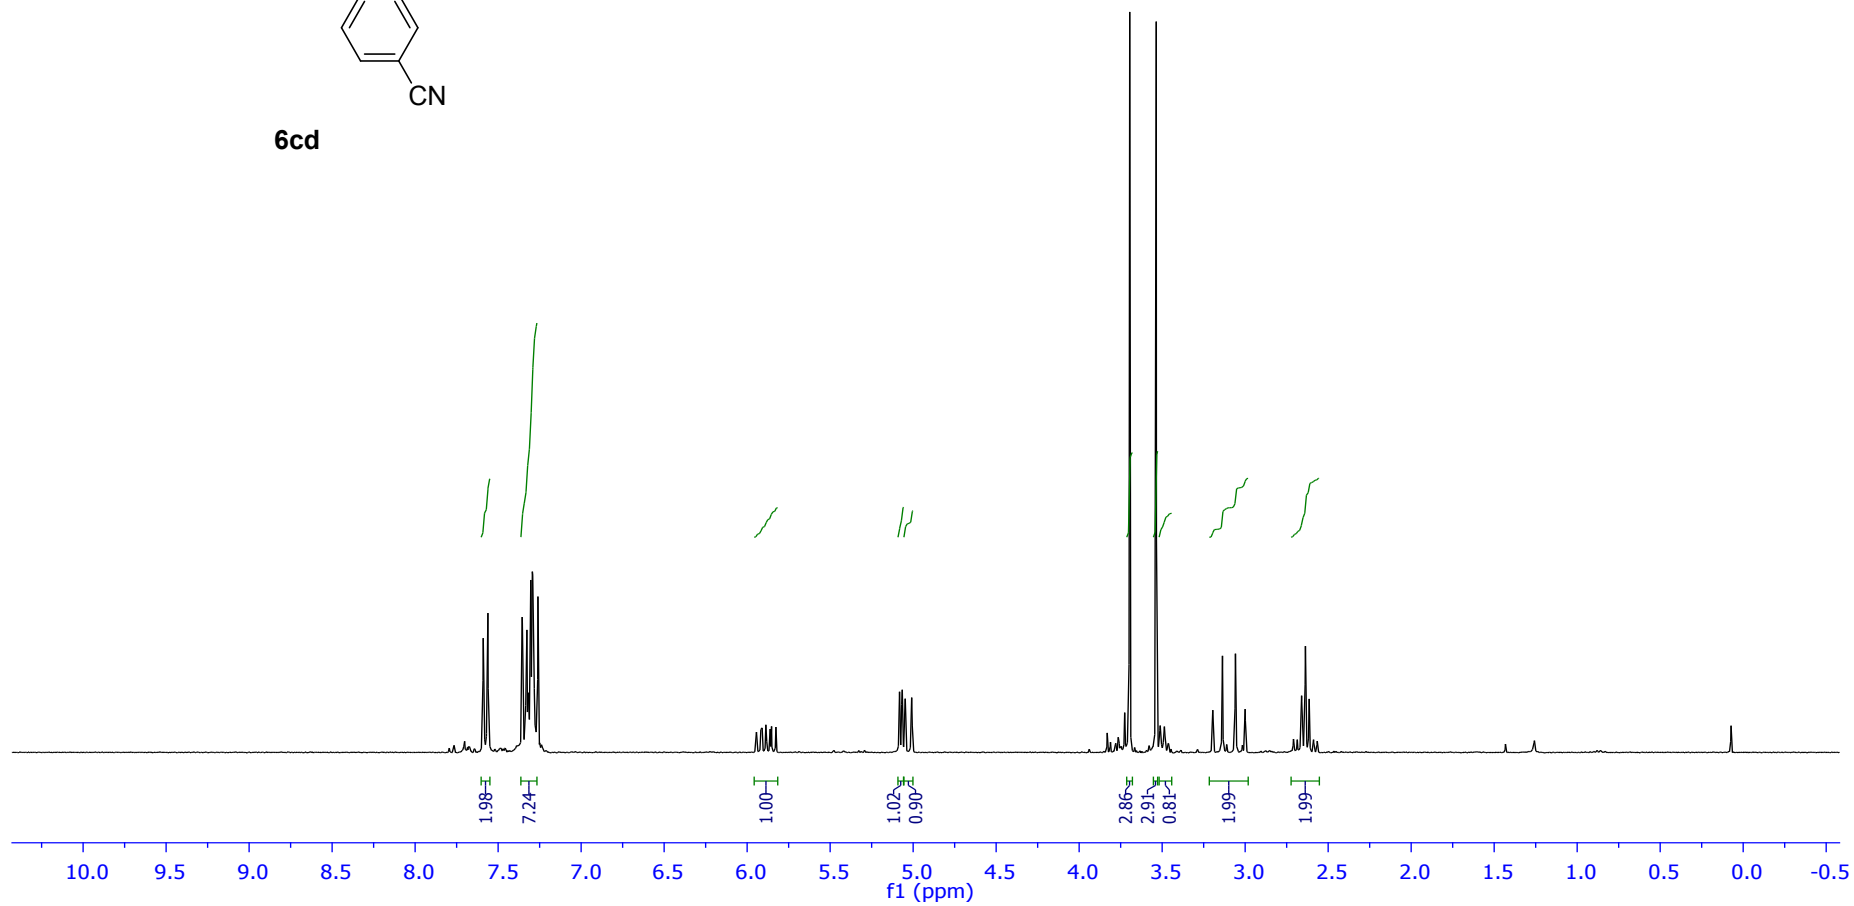

S106



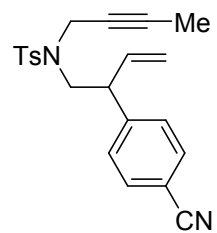

6ef

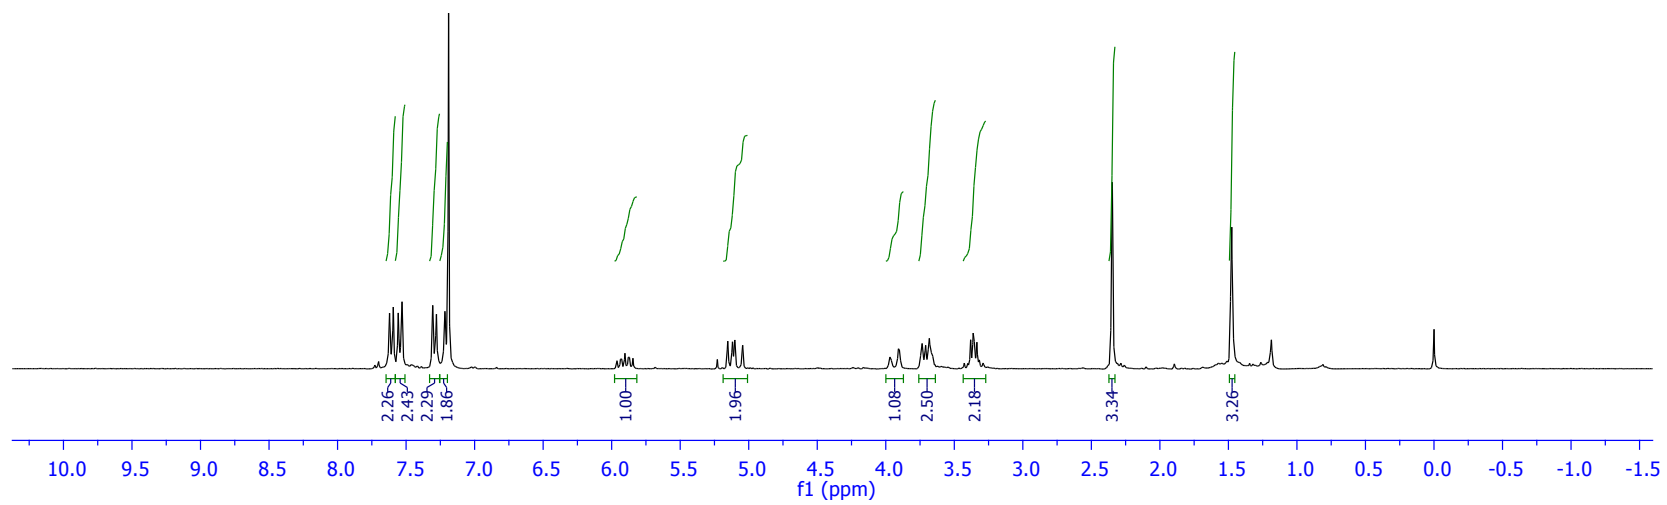



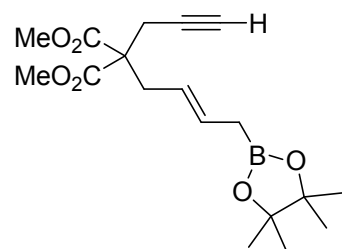

7

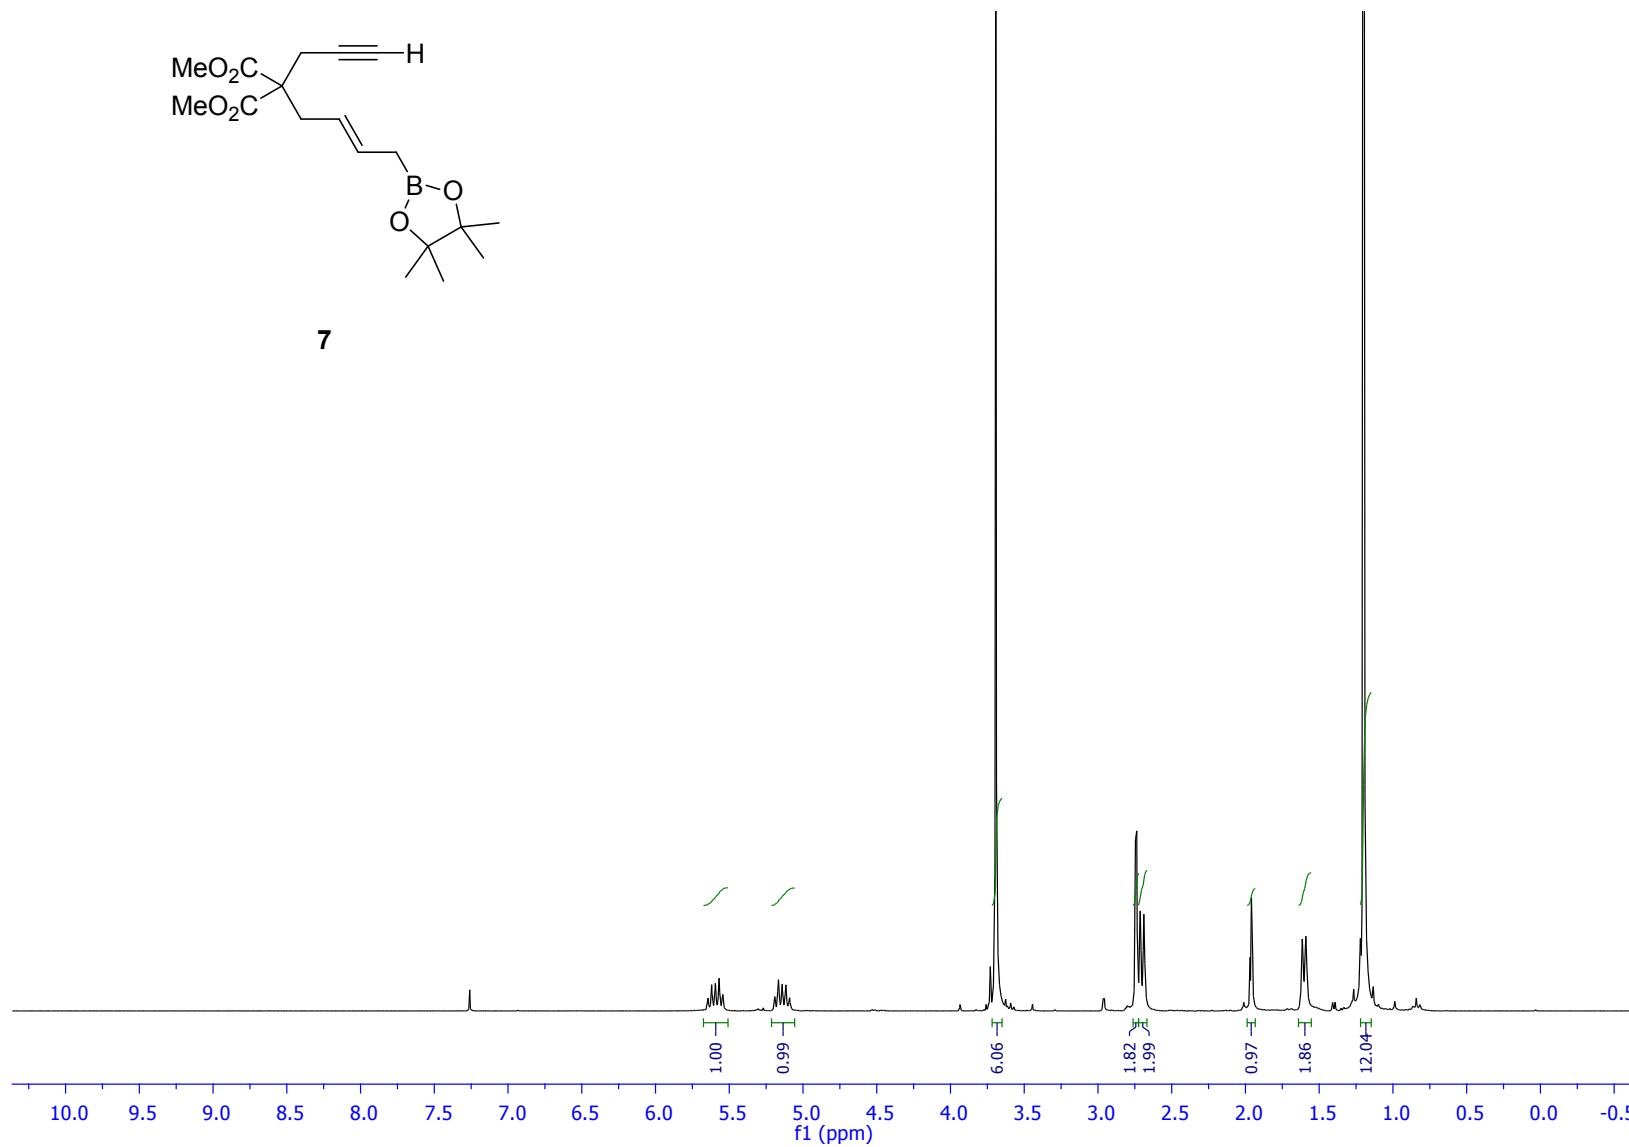

S110

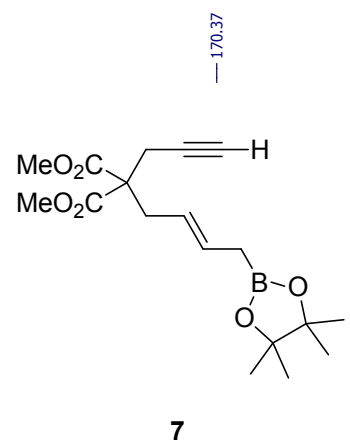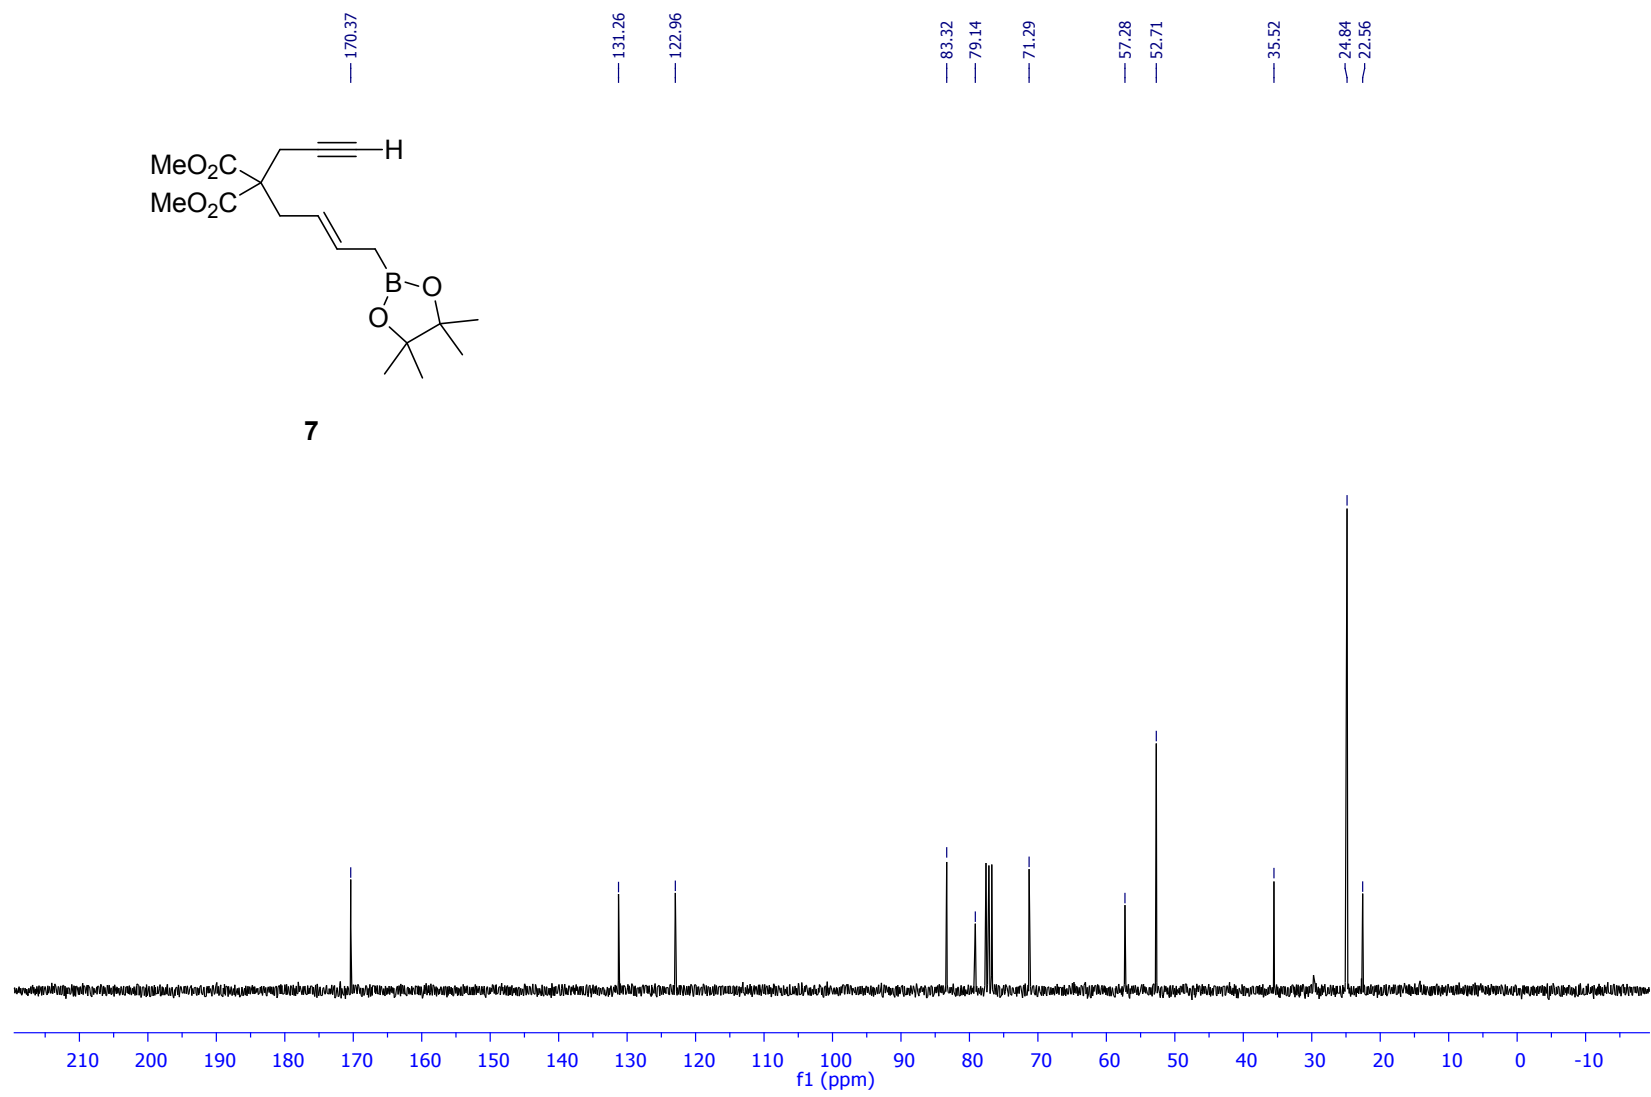

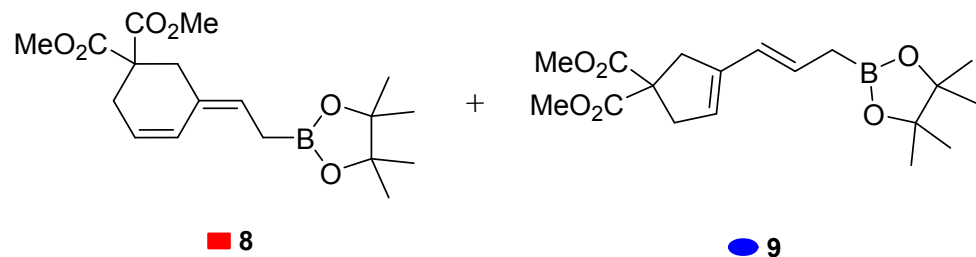

[ rt: ratio **8:9** / 1:1 (CRUDE) ]  
 [ rt: ratio **8:9** / 2:1 (ISOLATED) ]

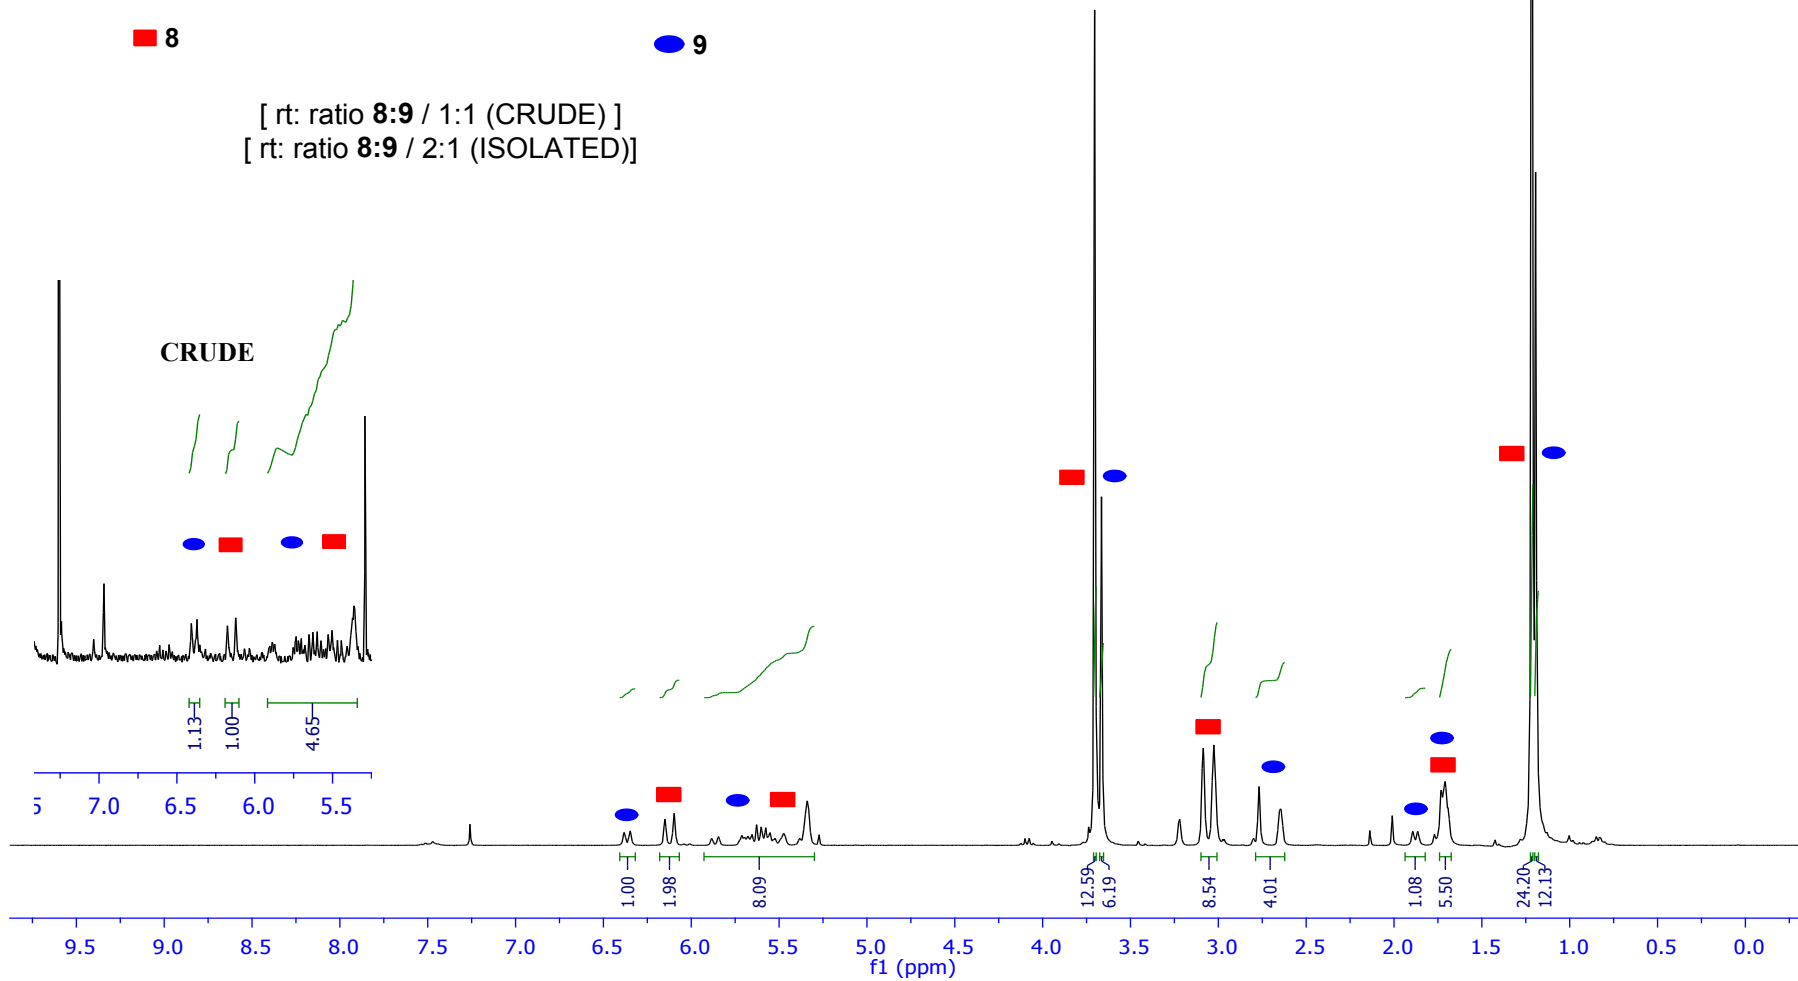



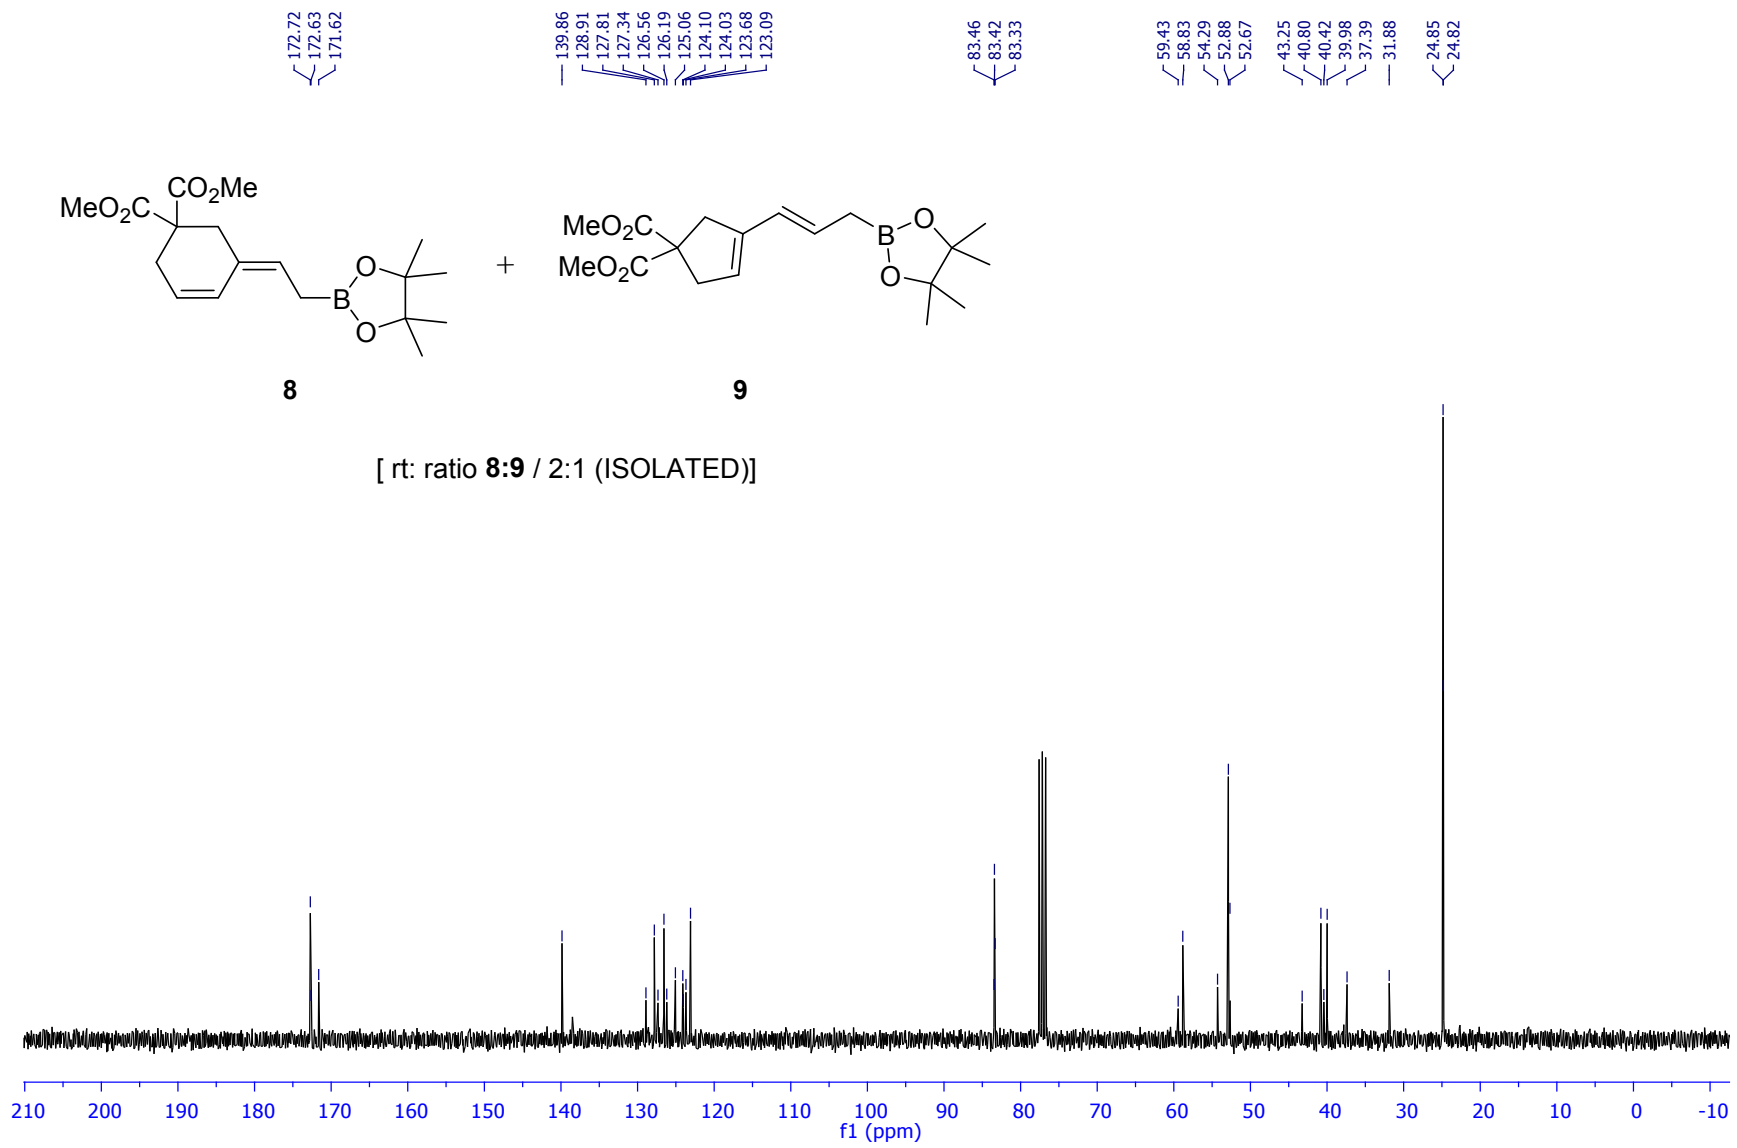

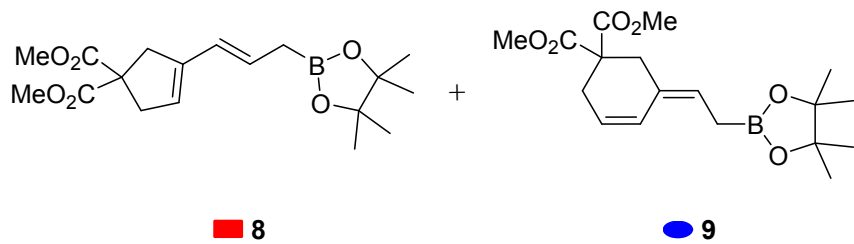

[ -78°C: ratio **8:9** / 1:3 (CRUDE) ]  
 [ -78°C: ratio **8:9** / 3:1 (ISOLATED) ]

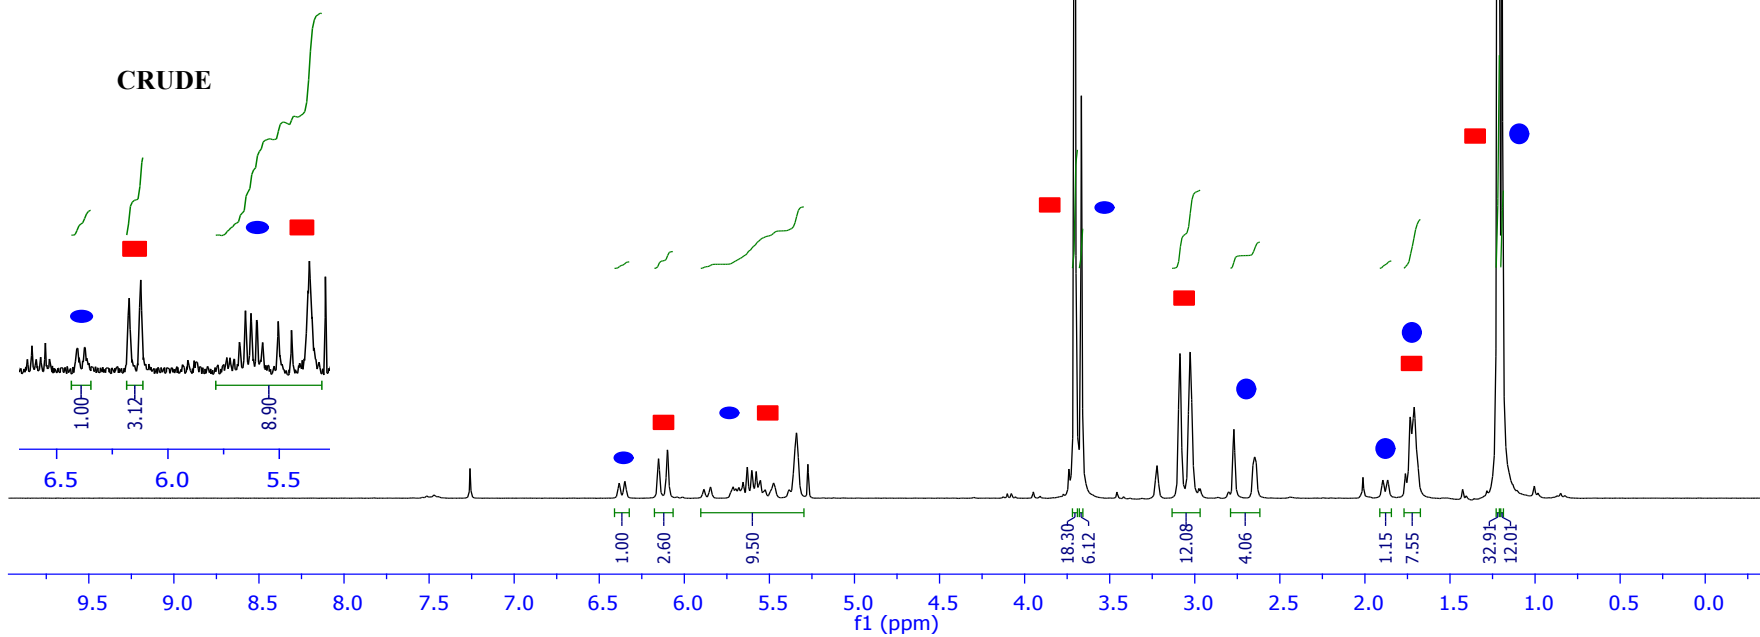

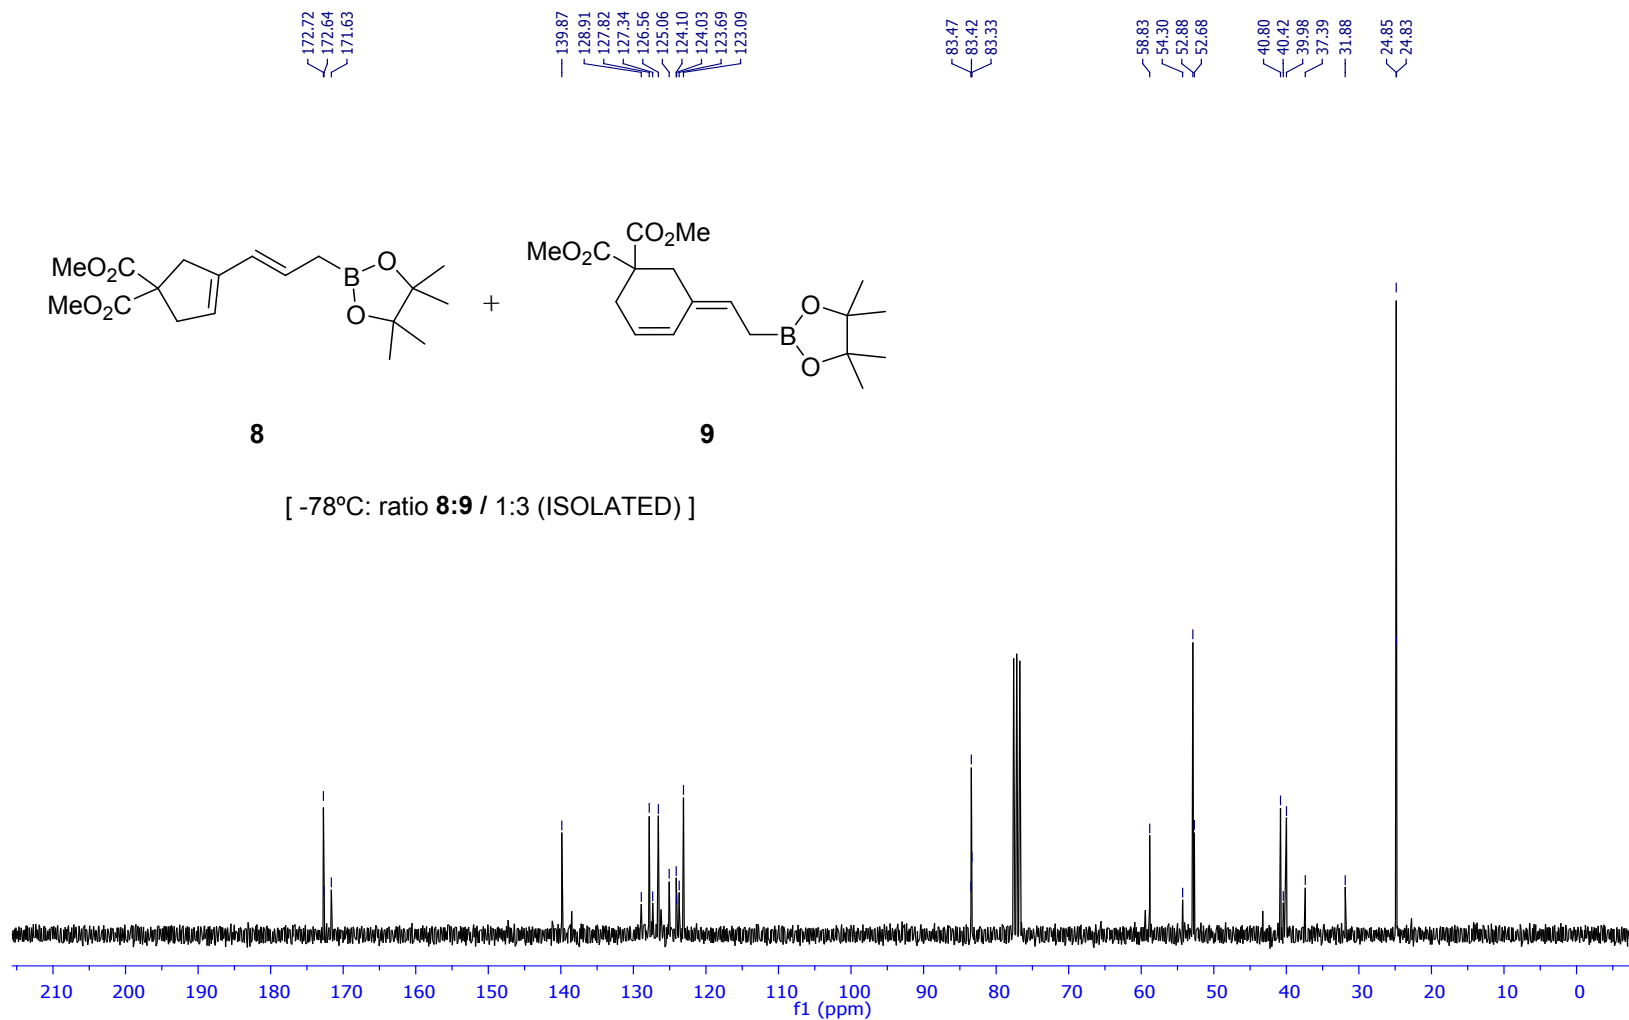

## X-ray diffraction analysis

### X-ray diffraction analysis of 3mn

Single crystals of **compound 3mn** suitable for X-ray diffraction were obtained by slow evaporation of a solution of the compound in hexane at room temperature. Details of the crystal structure, data acquisition and refining are given in the following tables.

## Crystal Structure Report for Compound 3mn

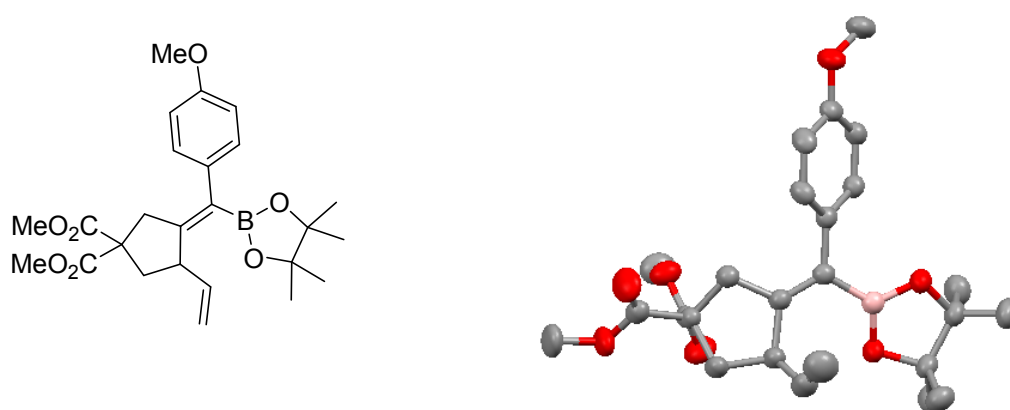

A clear colourless prismatic-like specimen of  $C_{25}H_{33}BO_7$ , approximate dimensions 0.10 mm x 0.19 mm x 0.24 mm, was used for the X-ray crystallographic analysis. The X-ray intensity data were measured.

**Table 1: Data collection details for compound 3mn.**

| Axis  | dx/mm  | 2 $\theta$ / $^\circ$ | $\omega$ / $^\circ$ | $\phi$ / $^\circ$ | $\chi$ / $^\circ$ | Width/ $^\circ$ | Frames | Time/s | Wavelength/ $\text{\AA}$ | Voltage/kV | Current/mA | Temperature/K |
|-------|--------|-----------------------|---------------------|-------------------|-------------------|-----------------|--------|--------|--------------------------|------------|------------|---------------|
| Phi   | 34.959 | 20.50                 | 12.48               | -347.51           | 28.87             | 0.50            | 739    | 40.00  | 0.71073                  | 50         | 30.0       | n/a           |
| Omega | 34.959 | 5.50                  | 3.78                | -182.80           | -61.97            | 0.50            | 89     | 40.00  | 0.71073                  | 50         | 30.0       | n/a           |
| Phi   | 34.959 | -12.00                | -14.73              | -313.05           | 82.04             | 0.50            | 739    | 40.00  | 0.71073                  | 50         | 30.0       | n/a           |

A total of 1567 frames were collected. The total exposure time was 17.41 hours. The frames were integrated with the Bruker SAINT software package using a narrow-frame algorithm. The integration of the data using a triclinic unit cell yielded a total of 16041 reflections to a maximum  $\theta$  angle of  $25.35^\circ$  (0.83  $\text{\AA}$  resolution), of which 4463 were independent (average redundancy 3.594, completeness = 99.4%,  $R_{\text{int}} = 3.45\%$ ,  $R_{\text{sig}} = 3.74\%$ ) and 3099 (69.44%) were greater than  $2\sigma(F^2)$ . The final cell constants of  $a = 9.5236(5)$   $\text{\AA}$ ,  $b = 11.7389(8)$   $\text{\AA}$ ,  $c = 12.5461(8)$   $\text{\AA}$ ,  $\alpha = 62.680(3)^\circ$ ,  $\beta = 84.635(3)^\circ$ ,  $\gamma = 81.559(3)^\circ$ , volume =  $1232.12(13)$   $\text{\AA}^3$ , are based upon the refinement of the XYZ-centroids of 4086 reflections above  $20 \sigma(I)$  with  $5.580^\circ < 2\theta < 49.09^\circ$ . Data were corrected for absorption effects using the multi-scan method (SADABS). The ratio of minimum to maximum apparent transmission was 0.900. The calculated minimum and maximum transmission coefficients (based on crystal size) are 0.9792 and 0.9913.

The structure was solved and refined using the Bruker SHELXTL Software Package, using the space group P  $-1$ , with  $Z = 2$  for the formula unit,  $C_{25}H_{33}BO_7$ . The final anisotropic full-matrix least-squares refinement on  $F^2$

with 305 variables converged at  $R1 = 4.77\%$ , for the observed data and  $wR2 = 18.11\%$  for all data. The goodness-of-fit was 1.004. The largest peak in the final difference electron density synthesis was  $0.290 \text{ e}/\text{\AA}^3$  and the largest hole was  $-0.306 \text{ e}/\text{\AA}^3$  with an RMS deviation of  $0.094 \text{ e}/\text{\AA}^3$ . On the basis of the final model, the calculated density was  $1.230 \text{ g}/\text{cm}^3$  and  $F(000)$ , 488  $e^-$ .

**Table 2. Sample and crystal data for compound 3mn.**

|                               |                                         |                            |
|-------------------------------|-----------------------------------------|----------------------------|
| <b>Identification code</b>    | <b>compound 3mn</b>                     |                            |
| <b>Chemical formula</b>       | $\text{C}_{25}\text{H}_{33}\text{BO}_7$ |                            |
| <b>Formula weight</b>         | 456.32                                  |                            |
| <b>Temperature</b>            | 296(2) K                                |                            |
| <b>Wavelength</b>             | 0.71073 $\text{\AA}$                    |                            |
| <b>Crystal size</b>           | 0.10 x 0.19 x 0.24 mm                   |                            |
| <b>Crystal habit</b>          | clear colourless prismatic              |                            |
| <b>Crystal system</b>         | triclinic                               |                            |
| <b>Space group</b>            | P -1                                    |                            |
| <b>Unit cell dimensions</b>   | $a = 9.5236(5) \text{\AA}$              | $\alpha = 62.680(3)^\circ$ |
|                               | $b = 11.7389(8) \text{\AA}$             | $\beta = 84.635(3)^\circ$  |
|                               | $c = 12.5461(8) \text{\AA}$             | $\gamma = 81.559(3)^\circ$ |
| <b>Volume</b>                 | $1232.12(13) \text{\AA}^3$              |                            |
| <b>Z</b>                      | 2                                       |                            |
| <b>Density (calculated)</b>   | $1.230 \text{ Mg}/\text{cm}^3$          |                            |
| <b>Absorption coefficient</b> | $0.088 \text{ mm}^{-1}$                 |                            |
| <b>F(000)</b>                 | 488                                     |                            |

**Table 3. Data collection and structure refinement for compound 3mn.**

|                                                |                                                                    |                                |
|------------------------------------------------|--------------------------------------------------------------------|--------------------------------|
| <b>Theta range for data collection</b>         | 1.83 to $25.35^\circ$                                              |                                |
| <b>Index ranges</b>                            | $-11 \leq h \leq 11$ , $-14 \leq k \leq 14$ , $-15 \leq l \leq 15$ |                                |
| <b>Reflections collected</b>                   | 16041                                                              |                                |
| <b>Independent reflections</b>                 | 4463 [ $R(\text{int}) = 0.0345$ ]                                  |                                |
| <b>Coverage of independent reflections</b>     | 99.4%                                                              |                                |
| <b>Absorption correction</b>                   | multi-scan                                                         |                                |
| <b>Max. and min. transmission</b>              | 0.9913 and 0.9792                                                  |                                |
| <b>Structure solution technique</b>            | direct methods                                                     |                                |
| <b>Structure solution program</b>              | SHELXS-97 (Sheldrick, 2008)                                        |                                |
| <b>Refinement method</b>                       | Full-matrix least-squares on $F^2$                                 |                                |
| <b>Refinement program</b>                      | SHELXL-97 (Sheldrick, 2008)                                        |                                |
| <b>Function minimized</b>                      | $\sum w(F_o^2 - F_c^2)^2$                                          |                                |
| <b>Data / restraints / parameters</b>          | 4463 / 0 / 305                                                     |                                |
| <b>Goodness-of-fit on <math>F^2</math></b>     | 1.004                                                              |                                |
| <b><math>\Delta/\sigma_{\text{max}}</math></b> | 0.018                                                              |                                |
| <b>Final R indices</b>                         | 3099 data; $I > 2\sigma(I)$                                        | $R1 = 0.0477$ , $wR2 = 0.1441$ |
|                                                | all data                                                           | $R1 = 0.0787$ , $wR2 = 0.1811$ |
| <b>Weighting scheme</b>                        | $w = 1/[\sigma^2(F_o^2) + (0.1253P)^2 + 0.0174P]$                  |                                |

|                             |                                   |
|-----------------------------|-----------------------------------|
| Largest diff. peak and hole | where $P=(F_o^2+2F_c^2)/3$        |
| R.M.S. deviation from mean  | 0.290 and -0.306 eÅ <sup>-3</sup> |
|                             | 0.094 eÅ <sup>-3</sup>            |

**Table 4. Atomic coordinates and equivalent isotropic atomic displacement parameters (Å<sup>2</sup>) for compound 3mn**

U(eq) is defined as one third of the trace of the orthogonalized U<sub>ij</sub> tensor.

|     | x/a         | y/b         | z/c         | U(eq)     |
|-----|-------------|-------------|-------------|-----------|
| B1  | 0.2156(2)   | 0.7944(2)   | 0.1748(2)   | 0.0369(6) |
| C1  | 0.1218(2)   | 0.89087(19) | 0.21489(18) | 0.0357(5) |
| C2  | 0.1216(2)   | 0.03292(19) | 0.13417(18) | 0.0351(5) |
| C3  | 0.1221(2)   | 0.1201(2)   | 0.1811(2)   | 0.0416(5) |
| C4  | 0.1211(2)   | 0.2509(2)   | 0.1086(2)   | 0.0464(6) |
| C5  | 0.1223(2)   | 0.2998(2)   | 0.9850(2)   | 0.0413(5) |
| C6  | 0.1236(2)   | 0.2161(2)   | 0.93518(19) | 0.0396(5) |
| C7  | 0.1250(2)   | 0.0843(2)   | 0.00987(19) | 0.0373(5) |
| C8  | 0.1329(3)   | 0.4841(2)   | 0.7931(2)   | 0.0633(7) |
| C9  | 0.3634(2)   | 0.7260(2)   | 0.0564(2)   | 0.0441(6) |
| C10 | 0.2822(3)   | 0.7583(3)   | 0.9455(2)   | 0.0628(7) |
| C11 | 0.5223(2)   | 0.7187(3)   | 0.0286(3)   | 0.0630(7) |
| C12 | 0.3158(2)   | 0.6077(2)   | 0.1703(2)   | 0.0429(5) |
| C13 | 0.2621(3)   | 0.5062(2)   | 0.1475(3)   | 0.0582(7) |
| C14 | 0.4267(3)   | 0.5431(3)   | 0.2681(3)   | 0.0602(7) |
| C15 | 0.0423(2)   | 0.84824(19) | 0.31751(18) | 0.0362(5) |
| C16 | 0.9289(2)   | 0.9282(2)   | 0.35599(19) | 0.0399(5) |
| C17 | 0.8241(2)   | 0.83128(19) | 0.43507(18) | 0.0382(5) |
| C18 | 0.9261(2)   | 0.7083(2)   | 0.5047(2)   | 0.0463(6) |
| C19 | 0.0461(2)   | 0.7071(2)   | 0.41383(19) | 0.0425(5) |
| C20 | 0.1853(3)   | 0.6483(3)   | 0.4737(2)   | 0.0596(7) |
| C21 | 0.2813(3)   | 0.7064(3)   | 0.4841(3)   | 0.0809(9) |
| C22 | 0.7354(2)   | 0.8745(2)   | 0.5196(2)   | 0.0452(6) |
| C23 | 0.5376(3)   | 0.8315(3)   | 0.6559(3)   | 0.0799(9) |
| C24 | 0.7266(2)   | 0.8084(2)   | 0.35940(19) | 0.0404(5) |
| C25 | 0.5390(3)   | 0.9055(3)   | 0.2237(3)   | 0.0713(8) |
| O1  | 0.12322(19) | 0.43085(15) | 0.92020(15) | 0.0576(5) |
| O2  | 0.19768(14) | 0.66692(14) | 0.21819(13) | 0.0433(4) |
| O3  | 0.32166(14) | 0.83150(14) | 0.08833(14) | 0.0452(4) |
| O4  | 0.63006(19) | 0.80208(17) | 0.57097(16) | 0.0639(5) |
| O5  | 0.7565(2)   | 0.9603(2)   | 0.54014(18) | 0.0733(6) |
| O6  | 0.64150(17) | 0.91520(15) | 0.29605(15) | 0.0544(5) |
| O7  | 0.72520(19) | 0.70859(17) | 0.35579(17) | 0.0647(5) |

**Table 5. Bond lengths (Å) for compound 3mn**

|       |          |        |          |
|-------|----------|--------|----------|
| B1-O2 | 1.369(3) | B1-O3  | 1.370(3) |
| B1-C1 | 1.573(3) | C1-C15 | 1.349(3) |
| C1-C2 | 1.502(3) | C2-C7  | 1.389(3) |

|         |          |         |          |
|---------|----------|---------|----------|
| C2-C3   | 1.396(3) | C3-C4   | 1.378(3) |
| C4-C5   | 1.385(3) | C5-O1   | 1.372(3) |
| C5-C6   | 1.383(3) | C6-C7   | 1.392(3) |
| C8-O1   | 1.420(3) | C9-O3   | 1.461(3) |
| C9-C10  | 1.519(3) | C9-C11  | 1.520(3) |
| C9-C12  | 1.555(3) | C12-O2  | 1.462(2) |
| C12-C13 | 1.510(3) | C12-C14 | 1.533(3) |
| C15-C16 | 1.517(3) | C15-C19 | 1.536(3) |
| C16-C17 | 1.545(3) | C17-C22 | 1.515(3) |
| C17-C24 | 1.519(3) | C17-C18 | 1.543(3) |
| C18-C19 | 1.541(3) | C19-C20 | 1.496(3) |
| C20-C21 | 1.268(4) | C22-O5  | 1.195(3) |
| C22-O4  | 1.331(3) | C23-O4  | 1.450(3) |
| C24-O7  | 1.195(3) | C24-O6  | 1.330(3) |
| C25-O6  | 1.443(3) |         |          |

**Table 6. Bond angles (°) for compound 3mn**

|             |            |             |            |
|-------------|------------|-------------|------------|
| O2-B1-O3    | 112.73(19) | O2-B1-C1    | 124.37(19) |
| O3-B1-C1    | 122.86(19) | C15-C1-C2   | 120.65(19) |
| C15-C1-B1   | 121.46(19) | C2-C1-B1    | 117.88(18) |
| C7-C2-C3    | 116.44(19) | C7-C2-C1    | 122.34(18) |
| C3-C2-C1    | 121.20(18) | C4-C3-C2    | 122.1(2)   |
| C3-C4-C5    | 120.2(2)   | O1-C5-C6    | 124.6(2)   |
| O1-C5-C4    | 116.1(2)   | C6-C5-C4    | 119.3(2)   |
| C5-C6-C7    | 119.6(2)   | C2-C7-C6    | 122.27(19) |
| O3-C9-C10   | 106.81(19) | O3-C9-C11   | 108.69(18) |
| C10-C9-C11  | 110.3(2)   | O3-C9-C12   | 102.28(17) |
| C10-C9-C12  | 113.45(19) | C11-C9-C12  | 114.6(2)   |
| O2-C12-C13  | 108.48(17) | O2-C12-C14  | 106.35(18) |
| C13-C12-C14 | 109.6(2)   | O2-C12-C9   | 102.24(16) |
| C13-C12-C9  | 115.4(2)   | C14-C12-C9  | 114.07(18) |
| C1-C15-C16  | 126.75(19) | C1-C15-C19  | 125.42(19) |
| C16-C15-C19 | 107.76(17) | C15-C16-C17 | 103.88(16) |
| C22-C17-C24 | 109.41(18) | C22-C17-C18 | 111.24(17) |
| C24-C17-C18 | 110.62(18) | C22-C17-C16 | 112.19(18) |
| C24-C17-C16 | 111.53(17) | C18-C17-C16 | 101.69(17) |
| C19-C18-C17 | 105.38(17) | C20-C19-C15 | 115.01(19) |
| C20-C19-C18 | 111.49(19) | C15-C19-C18 | 104.84(16) |
| C21-C20-C19 | 127.5(3)   | O5-C22-O4   | 123.6(2)   |
| O5-C22-C17  | 125.6(2)   | O4-C22-C17  | 110.8(2)   |
| O7-C24-O6   | 123.6(2)   | O7-C24-C17  | 125.4(2)   |
| O6-C24-C17  | 110.97(18) | C5-O1-C8    | 117.9(2)   |
| B1-O2-C12   | 107.37(16) | B1-O3-C9    | 107.35(16) |
| C22-O4-C23  | 116.8(2)   | C24-O6-C25  | 116.74(19) |

**Table 7. Anisotropic atomic displacement parameters ( $\text{\AA}^2$ ) for compound 3mn**

The anisotropic atomic displacement factor exponent takes the form:  $-2\pi^2[ h^2 a^{*2} U_{11} + \dots + 2 h k a^* b^* U_{12} ]$

|     | $U_{11}$   | $U_{22}$   | $U_{33}$   | $U_{23}$    | $U_{13}$    | $U_{12}$    |
|-----|------------|------------|------------|-------------|-------------|-------------|
| B1  | 0.0350(12) | 0.0387(14) | 0.0372(13) | -0.0170(11) | -0.0055(10) | -0.0029(10) |
| C1  | 0.0359(10) | 0.0346(12) | 0.0355(12) | -0.0144(9)  | -0.0059(9)  | -0.0029(8)  |
| C2  | 0.0324(10) | 0.0370(12) | 0.0367(12) | -0.0167(10) | -0.0037(8)  | -0.0042(8)  |
| C3  | 0.0486(12) | 0.0454(14) | 0.0330(12) | -0.0173(10) | -0.0006(9)  | -0.0138(10) |
| C4  | 0.0546(13) | 0.0476(14) | 0.0471(14) | -0.0280(12) | 0.0036(10)  | -0.0168(10) |
| C5  | 0.0369(11) | 0.0359(12) | 0.0451(13) | -0.0126(11) | 0.0014(9)   | -0.0080(9)  |
| C6  | 0.0388(11) | 0.0425(13) | 0.0334(12) | -0.0140(10) | -0.0002(9)  | -0.0039(9)  |
| C7  | 0.0377(11) | 0.0382(12) | 0.0379(12) | -0.0192(10) | -0.0004(9)  | -0.0033(9)  |
| C8  | 0.0696(17) | 0.0438(15) | 0.0537(16) | -0.0032(12) | -0.0002(13) | -0.0055(12) |
| C9  | 0.0394(11) | 0.0450(13) | 0.0510(14) | -0.0263(11) | 0.0040(10)  | -0.0013(9)  |
| C10 | 0.0637(16) | 0.0754(19) | 0.0518(16) | -0.0320(15) | 0.0018(12)  | -0.0070(13) |
| C11 | 0.0437(13) | 0.0649(17) | 0.080(2)   | -0.0363(15) | 0.0138(13)  | -0.0041(11) |
| C12 | 0.0396(11) | 0.0408(13) | 0.0515(14) | -0.0254(11) | 0.0013(10)  | -0.0008(9)  |
| C13 | 0.0612(15) | 0.0542(16) | 0.0741(18) | -0.0420(14) | 0.0088(13)  | -0.0123(12) |
| C14 | 0.0594(15) | 0.0484(15) | 0.0668(17) | -0.0227(13) | -0.0107(13) | 0.0055(11)  |
| C15 | 0.0372(11) | 0.0336(12) | 0.0351(12) | -0.0134(10) | -0.0049(9)  | -0.0007(8)  |
| C16 | 0.0438(11) | 0.0371(12) | 0.0380(12) | -0.0165(10) | -0.0021(9)  | -0.0032(9)  |
| C17 | 0.0440(11) | 0.0340(12) | 0.0328(11) | -0.0137(10) | 0.0016(9)   | -0.0004(9)  |
| C18 | 0.0535(13) | 0.0395(13) | 0.0345(12) | -0.0103(10) | 0.0020(10)  | 0.0037(10)  |
| C19 | 0.0486(12) | 0.0356(12) | 0.0347(12) | -0.0113(10) | 0.0017(10)  | 0.0026(9)   |
| C20 | 0.0626(16) | 0.0531(16) | 0.0451(15) | -0.0112(13) | -0.0026(12) | 0.0093(12)  |
| C21 | 0.075(2)   | 0.085(2)   | 0.072(2)   | -0.0246(18) | -0.0231(16) | -0.0018(17) |
| C22 | 0.0511(13) | 0.0437(14) | 0.0353(12) | -0.0157(11) | -0.0041(10) | 0.0047(10)  |
| C23 | 0.081(2)   | 0.089(2)   | 0.0618(18) | -0.0376(17) | 0.0283(15)  | 0.0064(16)  |
| C24 | 0.0466(12) | 0.0377(13) | 0.0368(12) | -0.0182(10) | 0.0073(9)   | -0.0057(9)  |
| C25 | 0.0688(17) | 0.073(2)   | 0.079(2)   | -0.0362(17) | -0.0279(15) | -0.0074(14) |
| O1  | 0.0749(11) | 0.0368(9)  | 0.0534(11) | -0.0137(8)  | 0.0058(8)   | -0.0116(8)  |
| O2  | 0.0442(8)  | 0.0403(9)  | 0.0476(9)  | -0.0234(7)  | 0.0066(7)   | -0.0047(6)  |
| O3  | 0.0412(8)  | 0.0411(9)  | 0.0543(10) | -0.0236(8)  | 0.0078(7)   | -0.0068(6)  |
| O4  | 0.0681(11) | 0.0630(12) | 0.0638(12) | -0.0359(10) | 0.0290(9)   | -0.0115(9)  |
| O5  | 0.0911(14) | 0.0829(15) | 0.0731(13) | -0.0589(12) | 0.0122(11)  | -0.0174(11) |
| O6  | 0.0602(10) | 0.0439(10) | 0.0617(11) | -0.0244(9)  | -0.0201(8)  | -0.0008(8)  |
| O7  | 0.0807(12) | 0.0479(11) | 0.0778(13) | -0.0390(10) | -0.0102(10) | -0.0028(9)  |

**Table 8. Hydrogen atomic coordinates and isotropic atomic displacement parameters ( $\text{\AA}^2$ ) for compound 3mn**

|    | x/a    | y/b    | z/c     | U(eq) |
|----|--------|--------|---------|-------|
| H3 | 0.1231 | 1.0890 | 0.2639  | 0.05  |
| H4 | 0.1195 | 1.3065 | 0.1429  | 0.056 |
| H6 | 0.1236 | 1.2477 | -0.1477 | 0.048 |



|      | x/a     | y/b    | z/c     | U(eq) |
|------|---------|--------|---------|-------|
| H7   | 0.1282  | 1.0287 | -0.0246 | 0.045 |
| H8A  | 0.2184  | 1.4458 | -0.2305 | 0.095 |
| H8B  | 0.1347  | 1.5757 | -0.2409 | 0.095 |
| H8C  | 0.0523  | 1.4668 | -0.2353 | 0.095 |
| H10A | 0.1820  | 0.7650 | -0.0364 | 0.094 |
| H10B | 0.3072  | 0.6913 | -0.0789 | 0.094 |
| H10C | 0.3060  | 0.8389 | -0.1182 | 0.094 |
| H11A | 0.5428  | 0.7948 | -0.0427 | 0.094 |
| H11B | 0.5529  | 0.6438 | 0.0163  | 0.094 |
| H11C | 0.5716  | 0.7128 | 0.0946  | 0.094 |
| H13A | 0.2332  | 0.4383 | 0.2223  | 0.087 |
| H13B | 0.3365  | 0.4713 | 0.1099  | 0.087 |
| H13C | 0.1826  | 0.5445 | 0.0958  | 0.087 |
| H14A | 0.4594  | 0.6075 | 0.2836  | 0.09  |
| H14B | 0.5054  | 0.5002 | 0.2417  | 0.09  |
| H14C | 0.3846  | 0.4812 | 0.3403  | 0.09  |
| H16A | -0.1178 | 0.9989 | 0.2870  | 0.048 |
| H16B | -0.0306 | 0.9630 | 0.4014  | 0.048 |
| H18A | -0.0363 | 0.7111 | 0.5726  | 0.056 |
| H18B | -0.1225 | 0.6319 | 0.5339  | 0.056 |
| H19  | 0.0224  | 0.6553 | 0.3765  | 0.051 |
| H20  | 0.2035  | 0.5588 | 0.5072  | 0.072 |
| H21A | 0.2689  | 0.7960 | 0.4524  | 0.097 |
| H21B | 0.3642  | 0.6596 | 0.5235  | 0.097 |
| H23A | -0.4123 | 0.8047 | 0.7281  | 0.12  |
| H23B | -0.5446 | 0.7865 | 0.6743  | 0.12  |
| H23C | -0.4914 | 0.9228 | 0.6214  | 0.12  |
| H25A | -0.4149 | 0.9078 | 0.1514  | 0.107 |
| H25B | -0.5349 | 0.9765 | 0.2036  | 0.107 |
| H25C | -0.5013 | 0.8257 | 0.2679  | 0.107 |

## Crystal Structure Report for Compound 3p

Single crystals of **compound 3p** suitable for X-ray diffraction were obtained by slow evaporation of a solution of the compound in hexane at room temperature. Details of the crystal structure, data acquisition and refining are given in the following table.

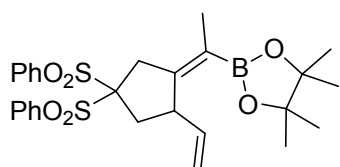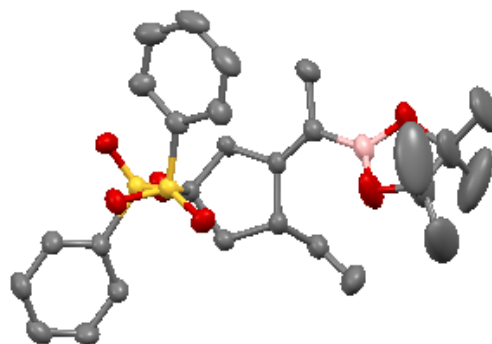

A clear colourless prismatic-like specimen of  $C_{27}H_{33}BO_6S_2$ , approximate dimensions 0.04 mm x 0.06 mm x 0.19 mm, was used for the X-ray crystallographic analysis. The X-ray intensity data were measured.

**Table 1: Data collection details for compound 3p.**

| Axis  | dx/mm  | 2 $\theta$ / $^\circ$ | $\omega$ / $^\circ$ | $\phi$ / $^\circ$ | $\chi$ / $^\circ$ | Width/ $^\circ$ | Frames | Time/s | Wavelength/ $\text{\AA}$ | Voltage/kV | Current/mA | Temperature/K |
|-------|--------|-----------------------|---------------------|-------------------|-------------------|-----------------|--------|--------|--------------------------|------------|------------|---------------|
| Phi   | 35.000 | 18.00                 | 4.37                | 15.98             | 36.29             | 0.50            | 639    | 120.00 | 0.71073                  | 50         | 30.0       | n/a           |
| Omega | 35.000 | -12.00                | -98.48              | -66.65            | 30.74             | 0.50            | 178    | 120.00 | 0.71073                  | 50         | 30.0       | n/a           |
| Omega | 35.000 | 15.50                 | 13.11               | 75.75             | -42.86            | 0.50            | 111    | 120.00 | 0.71073                  | 50         | 30.0       | n/a           |
| Omega | 35.000 | -17.00                | -105.88             | -93.28            | 32.60             | 0.50            | 130    | 120.00 | 0.71073                  | 50         | 30.0       | n/a           |
| Omega | 35.000 | -7.00                 | -37.77              | -213.27           | 93.98             | 0.50            | 63     | 120.00 | 0.71073                  | 50         | 30.0       | n/a           |
| Omega | 35.000 | -9.50                 | -2.08               | -265.18           | -44.66            | 0.50            | 141    | 120.00 | 0.71073                  | 50         | 30.0       | n/a           |
| Phi   | 35.000 | 8.00                  | 167.83              | -37.63            | -99.07            | 0.50            | 195    | 120.00 | 0.71073                  | 50         | 30.0       | n/a           |

A total of 1457 frames were collected. The total exposure time was 48.57 hours. The frames were integrated with the Bruker SAINT software package using a narrow-frame algorithm. The integration of the data using a monoclinic unit cell yielded a total of 50200 reflections to a maximum  $\theta$  angle of  $29.41^\circ$  (0.72  $\text{\AA}$  resolution), of which 7595 were independent (average redundancy 6.610, completeness = 98.7%,  $R_{\text{int}} = 6.10\%$ ,  $R_{\text{sig}} = 5.76\%$ ) and 4803 (63.24%) were greater than  $2\sigma(F^2)$ . The final cell constants of  $a = 8.1024(2)$   $\text{\AA}$ ,  $b = 13.4762(3)$   $\text{\AA}$ ,  $c = 25.6608(5)$   $\text{\AA}$ ,  $\beta = 96.5180(10)^\circ$ , volume = 2783.78(11)  $\text{\AA}^3$ , are based upon the refinement of the XYZ-centroids of 9994 reflections above  $20 \sigma(I)$  with  $5.060^\circ < 2\theta < 56.57^\circ$ . Data were corrected for absorption effects using the multi-scan method (SADABS). The ratio of minimum to maximum apparent transmission was 0.897. The calculated minimum and maximum transmission coefficients (based on crystal size) are 0.9577 and 0.9909.

The structure was solved and refined using the Bruker SHELXTL Software Package, using the space group  $P 1 21/c 1$ , with  $Z = 4$  for the formula unit,  $C_{27}H_{33}BO_6S_2$ . The final anisotropic full-matrix least-squares refinement on  $F^2$  with 331 variables converged at  $R1 = 6.01\%$ , for the observed data and  $wR2 = 17.94\%$  for all data. The goodness-of-fit was 1.018. The largest peak in the final difference electron density synthesis was 0.611  $e^-/\text{\AA}^3$  and the largest hole was -0.528  $e^-/\text{\AA}^3$  with an RMS deviation of 0.155  $e^-/\text{\AA}^3$ . On the basis of the final model, the calculated density was 1.261  $\text{g}/\text{cm}^3$  and  $F(000)$ , 1120  $e^-$ .

**Table 2. Sample and crystal data for compound 3p**

Identification code                      compound 3m

|                               |                                                                |                  |
|-------------------------------|----------------------------------------------------------------|------------------|
| <b>Chemical formula</b>       | C <sub>27</sub> H <sub>33</sub> BO <sub>6</sub> S <sub>2</sub> |                  |
| <b>Formula weight</b>         | 528.46                                                         |                  |
| <b>Temperature</b>            | 296(2) K                                                       |                  |
| <b>Wavelength</b>             | 0.71073 Å                                                      |                  |
| <b>Crystal size</b>           | 0.04 x 0.06 x 0.19 mm                                          |                  |
| <b>Crystal habit</b>          | clear colourless prismatic                                     |                  |
| <b>Crystal system</b>         | monoclinic                                                     |                  |
| <b>Space group</b>            | P 1 21/c 1                                                     |                  |
| <b>Unit cell dimensions</b>   | a = 8.1024(2) Å                                                | α = 90°          |
|                               | b = 13.4762(3) Å                                               | β = 96.5180(10)° |
|                               | c = 25.6608(5) Å                                               | γ = 90°          |
| <b>Volume</b>                 | 2783.78(11) Å <sup>3</sup>                                     |                  |
| <b>Z</b>                      | 4                                                              |                  |
| <b>Density (calculated)</b>   | 1.261 Mg/cm <sup>3</sup>                                       |                  |
| <b>Absorption coefficient</b> | 0.229 mm <sup>-1</sup>                                         |                  |
| <b>F(000)</b>                 | 1120                                                           |                  |

**Table 3. Data collection and structure refinement for compound 3p.**

|                                            |                                                                                                                                                                       |                           |
|--------------------------------------------|-----------------------------------------------------------------------------------------------------------------------------------------------------------------------|---------------------------|
| <b>Theta range for data collection</b>     | 1.60 to 29.41°                                                                                                                                                        |                           |
| <b>Index ranges</b>                        | -10 ≤ h ≤ 11, -18 ≤ k ≤ 18, -35 ≤ l ≤ 35                                                                                                                              |                           |
| <b>Reflections collected</b>               | 50200                                                                                                                                                                 |                           |
| <b>Independent reflections</b>             | 7595 [R(int) = 0.0610]                                                                                                                                                |                           |
| <b>Coverage of independent reflections</b> | 98.7%                                                                                                                                                                 |                           |
| <b>Absorption correction</b>               | multi-scan                                                                                                                                                            |                           |
| <b>Max. and min. transmission</b>          | 0.9909 and 0.9577                                                                                                                                                     |                           |
| <b>Structure solution technique</b>        | direct methods                                                                                                                                                        |                           |
| <b>Structure solution program</b>          | SHELXS-97 (Sheldrick, 2008)                                                                                                                                           |                           |
| <b>Refinement method</b>                   | Full-matrix least-squares on F <sup>2</sup>                                                                                                                           |                           |
| <b>Refinement program</b>                  | SHELXL-97 (Sheldrick, 2008)                                                                                                                                           |                           |
| <b>Function minimized</b>                  | Σ w(F <sub>o</sub> <sup>2</sup> - F <sub>c</sub> <sup>2</sup> ) <sup>2</sup>                                                                                          |                           |
| <b>Data / restraints / parameters</b>      | 7595 / 0 / 331                                                                                                                                                        |                           |
| <b>Goodness-of-fit on F<sup>2</sup></b>    | 1.018                                                                                                                                                                 |                           |
| <b>Δ/σ<sub>max</sub></b>                   | 0.010                                                                                                                                                                 |                           |
| <b>Final R indices</b>                     | 4803 data; I > 2σ(I)                                                                                                                                                  | R1 = 0.0601, wR2 = 0.1482 |
|                                            | all data                                                                                                                                                              | R1 = 0.1082, wR2 = 0.1794 |
| <b>Weighting scheme</b>                    | w = 1/[σ <sup>2</sup> (F <sub>o</sub> <sup>2</sup> ) + (0.1068P) <sup>2</sup> + 0.0863P]<br>where P = (F <sub>o</sub> <sup>2</sup> + 2F <sub>c</sub> <sup>2</sup> )/3 |                           |
| <b>Extinction coefficient</b>              | 0.0227(19)                                                                                                                                                            |                           |
| <b>Largest diff. peak and hole</b>         | 0.611 and -0.528 eÅ <sup>-3</sup>                                                                                                                                     |                           |
| <b>R.M.S. deviation from mean</b>          | 0.155 eÅ <sup>-3</sup>                                                                                                                                                |                           |

**Table 4. Atomic coordinates and equivalent isotropic atomic displacement parameters ( $\text{\AA}^2$ ) for compound 3p.**

U(eq) is defined as one third of the trace of the orthogonalized  $U_{ij}$  tensor.

|     | x/a              | y/b              | z/c         | U(eq)      |
|-----|------------------|------------------|-------------|------------|
| B1  | 0.1897(4)        | 0.2121(2)        | 0.06852(10) | 0.0443(7)  |
| C1  | 0.8229(3)        | 0.09438(16)<br>) | 0.32814(8)  | 0.0318(5)  |
| C2  | 0.8161(3)        | 0.00973(18)<br>) | 0.35838(9)  | 0.0399(5)  |
| C3  | 0.6706(3)        | 0.98623(19)<br>) | 0.37897(10) | 0.0464(6)  |
| C4  | 0.5329(3)        | 0.0464(2)        | 0.36844(10) | 0.0476(6)  |
| C5  | 0.5398(3)        | 0.1307(2)        | 0.33864(10) | 0.0476(6)  |
| C6  | 0.6850(3)        | 0.15612(19)<br>) | 0.31852(9)  | 0.0409(5)  |
| C7  | 0.2183(3)        | 0.94921(17)<br>) | 0.21057(9)  | 0.0366(5)  |
| C8  | 0.3324(3)        | 0.92796(19)<br>) | 0.25342(10) | 0.0454(6)  |
| C9  | 0.4925(3)        | 0.9028(2)        | 0.24503(12) | 0.0563(7)  |
| C10 | 0.5384(3)        | 0.8986(2)        | 0.19506(13) | 0.0598(8)  |
| C11 | 0.4231(4)        | 0.9186(2)        | 0.15270(12) | 0.0620(8)  |
| C12 | 0.2626(3)        | 0.9450(2)        | 0.15988(10) | 0.0477(6)  |
| C16 | 0.9332(3)        | 0.19527(16)<br>) | 0.15130(8)  | 0.0340(5)  |
| C17 | 0.1229(3)        | 0.18911(16)<br>) | 0.16313(8)  | 0.0325(5)  |
| C18 | 0.2354(3)        | 0.19775(18)<br>) | 0.12881(8)  | 0.0382(5)  |
| C19 | 0.8730(3)        | 0.29571(19)<br>) | 0.13280(9)  | 0.0433(6)  |
| C20 | 0.7768(4)        | 0.3140(3)        | 0.08923(12) | 0.0704(9)  |
| C21 | 0.4205(3)        | 0.1938(2)        | 0.14633(10) | 0.0515(7)  |
| C25 | 0.2099(5)        | 0.2703(4)        | 0.98621(11) | 0.0952(14) |
| C26 | 0.0813(5)        | 0.1925(3)        | 0.98362(11) | 0.0938(14) |
| C27 | 0.0125(3)        | 0.11562(15)<br>) | 0.23691(7)  | 0.0301(5)  |
| C28 | 0.1652(3)        | 0.17130(17)<br>) | 0.22113(7)  | 0.0322(5)  |
| C29 | 0.8679(3)        | 0.16787(17)<br>) | 0.20391(8)  | 0.0340(5)  |
| C30 | 0.3411(7)        | 0.2688(5)        | 0.94960(16) | 0.141(2)   |
| C31 | 0.9170(7)        | 0.2042(5)        | 0.95267(15) | 0.152(3)   |
| C32 | 0.1638(10)       | 0.0903(4)        | 0.96440(19) | 0.189(3)   |
| C33 | 0.1204(9)        | 0.3739(4)        | 0.9821(2)   | 0.176(3)   |
| O1  | 0.14358(19)<br>) | 0.07004(14)<br>) | 0.33320(6)  | 0.0441(4)  |

|    | x/a        | y/b         | z/c          | U(eq)       |
|----|------------|-------------|--------------|-------------|
| O2 | 0.0256(2)  | 0.23751(13) | 0.31635(6)   | 0.0470(4)   |
| O3 | 0.9557(2)  | 0.92642(12) | 0.26094(6)   | 0.0406(4)   |
| O4 | 0.9170(2)  | 0.97641(12) | 0.16785(6)   | 0.0414(4)   |
| O7 | 0.2918(3)  | 0.2630(2)   | 0.03985(7)   | 0.0812(7)   |
| O8 | 0.0565(3)  | 0.17544(19) | 0.03875(7)   | 0.0809(8)   |
| S1 | 0.01122(6) | 0.98238(4)  | 0.21858(2)   | 0.03183(16) |
| S2 | 0.01429(7) | 0.13213(4)  | 0.308099(19) | 0.03276(17) |

**Table 5. Bond lengths (Å) for compound 3p.**

|         |            |         |            |
|---------|------------|---------|------------|
| B1-O8   | 1.344(4)   | B1-O7   | 1.354(3)   |
| B1-C18  | 1.561(3)   | C1-C2   | 1.384(3)   |
| C1-C6   | 1.393(3)   | C1-S2   | 1.763(2)   |
| C2-C3   | 1.382(3)   | C3-C4   | 1.381(4)   |
| C4-C5   | 1.374(4)   | C5-C6   | 1.380(3)   |
| C7-C8   | 1.384(3)   | C7-C12  | 1.389(3)   |
| C7-S1   | 1.771(2)   | C8-C9   | 1.381(3)   |
| C9-C10  | 1.376(4)   | C10-C11 | 1.377(4)   |
| C11-C12 | 1.381(4)   | C16-C19 | 1.498(3)   |
| C16-C17 | 1.534(3)   | C16-C29 | 1.550(3)   |
| C17-C18 | 1.343(3)   | C17-C28 | 1.508(3)   |
| C18-C21 | 1.517(3)   | C19-C20 | 1.311(4)   |
| C25-O7  | 1.462(4)   | C25-C26 | 1.475(5)   |
| C25-C30 | 1.496(6)   | C25-C33 | 1.570(7)   |
| C26-O8  | 1.469(3)   | C26-C31 | 1.479(6)   |
| C26-C32 | 1.632(7)   | C27-C29 | 1.537(3)   |
| C27-C28 | 1.540(3)   | C27-S2  | 1.839(2)   |
| C27-S1  | 1.856(2)   | O1-S2   | 1.4350(16) |
| O2-S2   | 1.4373(17) | O3-S1   | 1.4368(16) |
| O4-S1   | 1.4345(15) |         |            |

**Table 6. Bond angles (°) for compound 3p**

|           |            |           |            |
|-----------|------------|-----------|------------|
| O8-B1-O7  | 112.2(2)   | O8-B1-C18 | 127.0(2)   |
| O7-B1-C18 | 120.7(2)   | C2-C1-C6  | 120.6(2)   |
| C2-C1-S2  | 119.57(17) | C6-C1-S2  | 119.38(17) |
| C3-C2-C1  | 119.5(2)   | C4-C3-C2  | 119.7(2)   |
| C5-C4-C3  | 120.8(2)   | C4-C5-C6  | 120.2(2)   |
| C5-C6-C1  | 119.1(2)   | C8-C7-C12 | 121.0(2)   |

|             |            |             |            |
|-------------|------------|-------------|------------|
| C8-C7-S1    | 121.09(18) | C12-C7-S1   | 117.88(19) |
| C9-C8-C7    | 118.8(2)   | C10-C9-C8   | 120.9(3)   |
| C11-C10-C9  | 119.8(3)   | C10-C11-C12 | 120.7(3)   |
| C11-C12-C7  | 118.9(3)   | C19-C16-C17 | 113.25(18) |
| C19-C16-C29 | 111.11(18) | C17-C16-C29 | 104.38(16) |
| C18-C17-C28 | 124.5(2)   | C18-C17-C16 | 127.23(19) |
| C28-C17-C16 | 108.30(17) | C17-C18-C21 | 121.6(2)   |
| C17-C18-B1  | 123.9(2)   | C21-C18-B1  | 114.4(2)   |
| C20-C19-C16 | 125.5(3)   | O7-C25-C26  | 103.7(3)   |
| O7-C25-C30  | 108.1(4)   | C26-C25-C30 | 120.7(4)   |
| O7-C25-C33  | 106.3(3)   | C26-C25-C33 | 108.1(4)   |
| C30-C25-C33 | 109.0(4)   | O8-C26-C25  | 103.9(2)   |
| O8-C26-C31  | 108.7(3)   | C25-C26-C31 | 122.4(4)   |
| O8-C26-C32  | 105.3(3)   | C25-C26-C32 | 107.6(4)   |
| C31-C26-C32 | 107.6(4)   | C29-C27-C28 | 102.53(16) |
| C29-C27-S2  | 114.31(14) | C28-C27-S2  | 106.64(13) |
| C29-C27-S1  | 108.76(14) | C28-C27-S1  | 112.73(15) |
| S2-C27-S1   | 111.59(11) | C17-C28-C27 | 103.76(16) |
| C27-C29-C16 | 105.94(16) | B1-O7-C25   | 107.8(2)   |
| B1-O8-C26   | 107.5(2)   | O4-S1-O3    | 118.50(10) |
| O4-S1-C7    | 107.10(10) | O3-S1-C7    | 109.73(11) |
| O4-S1-C27   | 105.74(9)  | O3-S1-C27   | 108.02(9)  |
| C7-S1-C27   | 107.19(10) | O1-S2-O2    | 118.61(11) |
| O1-S2-C1    | 108.80(10) | O2-S2-C1    | 106.60(10) |
| O1-S2-C27   | 107.37(9)  | O2-S2-C27   | 105.01(10) |
| C1-S2-C27   | 110.30(9)  |             |            |

**Table 7. Anisotropic atomic displacement parameters (Å<sup>2</sup>) for compound 3p**

The anisotropic atomic displacement factor exponent takes the form:  $-2\pi^2[h^2 a^{*2} U_{11} + \dots + 2 h k a^* b^* U_{12}]$

|     | <b>U<sub>11</sub></b> | <b>U<sub>22</sub></b> | <b>U<sub>33</sub></b> | <b>U<sub>23</sub></b> | <b>U<sub>13</sub></b> | <b>U<sub>12</sub></b> |
|-----|-----------------------|-----------------------|-----------------------|-----------------------|-----------------------|-----------------------|
| B1  | 0.0523(17)            | 0.0503(17)            | 0.0324(12)            | -0.0007(12)           | 0.0136(12)            | -0.0053(13)           |
| C1  | 0.0345(11)            | 0.0356(12)            | 0.0267(10)            | -0.0018(9)            | 0.0099(8)             | 0.0007(9)             |
| C2  | 0.0432(13)            | 0.0404(13)            | 0.0371(12)            | 0.0022(10)            | 0.0093(10)            | 0.0079(10)            |
| C3  | 0.0520(15)            | 0.0439(14)            | 0.0462(14)            | 0.0061(11)            | 0.0175(12)            | -0.0036(11)           |
| C4  | 0.0410(14)            | 0.0567(16)            | 0.0480(14)            | -0.0042(12)           | 0.0175(11)            | -0.0059(12)           |
| C5  | 0.0358(13)            | 0.0587(16)            | 0.0497(14)            | 0.0014(12)            | 0.0105(11)            | 0.0108(11)            |
| C6  | 0.0407(13)            | 0.0453(14)            | 0.0386(12)            | 0.0066(10)            | 0.0122(10)            | 0.0075(10)            |
| C7  | 0.0366(12)            | 0.0353(12)            | 0.0389(12)            | -0.0086(10)           | 0.0084(10)            | -0.0027(9)            |
| C8  | 0.0410(13)            | 0.0496(15)            | 0.0453(13)            | -0.0086(11)           | 0.0030(11)            | 0.0010(11)            |
| C9  | 0.0381(14)            | 0.0571(17)            | 0.0724(19)            | -0.0134(15)           | 0.0005(13)            | 0.0021(12)            |
| C10 | 0.0384(14)            | 0.0511(17)            | 0.093(2)              | -0.0176(15)           | 0.0224(15)            | -0.0038(12)           |
| C11 | 0.0638(19)            | 0.0646(19)            | 0.0638(18)            | -0.0121(15)           | 0.0345(15)            | -0.0036(15)           |
| C12 | 0.0516(15)            | 0.0533(16)            | 0.0403(13)            | -0.0059(12)           | 0.0146(11)            | 0.0012(12)            |
| C16 | 0.0352(12)            | 0.0399(13)            | 0.0267(10)            | 0.0010(9)             | 0.0022(9)             | -0.0040(9)            |
| C17 | 0.0345(11)            | 0.0349(12)            | 0.0283(10)            | 0.0019(9)             | 0.0049(8)             | -0.0043(9)            |

|     | $U_{11}$   | $U_{22}$   | $U_{33}$   | $U_{23}$    | $U_{13}$   | $U_{12}$    |
|-----|------------|------------|------------|-------------|------------|-------------|
| C18 | 0.0380(12) | 0.0445(14) | 0.0330(11) | 0.0003(10)  | 0.0088(9)  | -0.0030(10) |
| C19 | 0.0420(13) | 0.0470(14) | 0.0424(12) | 0.0079(11)  | 0.0110(10) | -0.0003(11) |
| C20 | 0.067(2)   | 0.084(2)   | 0.0591(18) | 0.0249(17)  | 0.0033(15) | 0.0161(17)  |
| C21 | 0.0380(14) | 0.0700(19) | 0.0483(14) | 0.0041(13)  | 0.0129(11) | -0.0055(12) |
| C25 | 0.109(3)   | 0.144(4)   | 0.0337(15) | 0.0164(19)  | 0.0100(17) | -0.045(3)   |
| C26 | 0.113(3)   | 0.140(4)   | 0.0286(13) | -0.0015(19) | 0.0120(17) | -0.040(3)   |
| C27 | 0.0306(11) | 0.0360(12) | 0.0238(9)  | -0.0007(8)  | 0.0041(8)  | -0.0040(9)  |
| C28 | 0.0290(10) | 0.0410(12) | 0.0268(10) | -0.0008(9)  | 0.0045(8)  | -0.0076(9)  |
| C29 | 0.0302(11) | 0.0407(12) | 0.0317(10) | 0.0005(9)   | 0.0056(9)  | -0.0012(9)  |
| C30 | 0.137(4)   | 0.235(6)   | 0.061(2)   | 0.022(3)    | 0.048(3)   | -0.047(4)   |
| C31 | 0.140(4)   | 0.258(8)   | 0.050(2)   | 0.018(3)    | -0.022(3)  | -0.077(5)   |
| C32 | 0.378(11)  | 0.116(4)   | 0.085(3)   | -0.043(3)   | 0.082(5)   | -0.032(6)   |
| C33 | 0.311(9)   | 0.112(4)   | 0.093(4)   | 0.033(3)    | -0.029(5)  | 0.044(5)    |
| O1  | 0.0326(8)  | 0.0678(12) | 0.0313(8)  | 0.0015(8)   | 0.0014(6)  | 0.0034(8)   |
| O2  | 0.0628(11) | 0.0415(10) | 0.0388(9)  | -0.0100(7)  | 0.0147(8)  | -0.0127(8)  |
| O3  | 0.0459(9)  | 0.0397(9)  | 0.0381(9)  | 0.0009(7)   | 0.0127(7)  | -0.0049(7)  |
| O4  | 0.0431(9)  | 0.0439(10) | 0.0349(8)  | -0.0069(7)  | -0.0057(7) | -0.0054(7)  |
| O7  | 0.0823(15) | 0.123(2)   | 0.0383(10) | 0.0190(11)  | 0.0076(10) | -0.0401(14) |
| O8  | 0.0892(17) | 0.123(2)   | 0.0313(9)  | -0.0004(11) | 0.0091(10) | -0.0474(15) |
| S1  | 0.0317(3)  | 0.0350(3)  | 0.0290(3)  | -0.0037(2)  | 0.0046(2)  | -0.0037(2)  |
| S2  | 0.0339(3)  | 0.0401(3)  | 0.0250(3)  | -0.0032(2)  | 0.0062(2)  | -0.0035(2)  |

**Table 8. Hydrogen atomic coordinates and isotropic atomic displacement parameters ( $\text{\AA}^2$ ) for compound 3p.**

|      | $x/a$   | $y/b$   | $z/c$  | $U(\text{eq})$ |
|------|---------|---------|--------|----------------|
| H2   | -0.0912 | -0.0310 | 0.3648 | 0.048          |
| H3   | -0.3345 | -0.0699 | 0.3998 | 0.056          |
| H4   | -0.5656 | 0.0297  | 0.3817 | 0.057          |
| H5   | -0.5537 | 0.1708  | 0.3320 | 0.057          |
| H6   | -0.3094 | 0.2137  | 0.2988 | 0.049          |
| H8   | 0.3018  | -0.0694 | 0.2873 | 0.055          |
| H9   | 0.5703  | -0.1114 | 0.2735 | 0.068          |
| H10  | 0.6469  | -0.1177 | 0.1899 | 0.072          |
| H11  | 0.4537  | -0.0857 | 0.1189 | 0.074          |
| H12  | 0.1854  | -0.0403 | 0.1313 | 0.057          |
| H16  | -0.1050 | 0.1456  | 0.1247 | 0.041          |
| H19  | -0.0935 | 0.3497  | 0.1540 | 0.052          |
| H20A | -0.2596 | 0.2621  | 0.0669 | 0.084          |
| H20B | -0.2549 | 0.3788  | 0.0806 | 0.084          |
| H21A | 0.4388  | 0.1924  | 0.1840 | 0.077          |
| H21B | 0.4732  | 0.2513  | 0.1336 | 0.077          |
| H21C | 0.4667  | 0.1351  | 0.1325 | 0.077          |
| H28A | 0.1816  | 0.2335  | 0.2400 | 0.039          |
| H28B | 0.2648  | 0.1313  | 0.2280 | 0.039          |

|      | x/a     | y/b    | z/c     | U(eq) |
|------|---------|--------|---------|-------|
| H29A | -0.1649 | 0.2271 | 0.2216  | 0.041 |
| H29B | -0.2273 | 0.1240 | 0.1979  | 0.041 |
| H30A | 0.4080  | 0.3275 | -0.0453 | 0.212 |
| H30B | 0.2895  | 0.2666 | -0.0860 | 0.212 |
| H30C | 0.4099  | 0.2112 | -0.0434 | 0.212 |
| H31A | -0.1526 | 0.1490 | -0.0408 | 0.228 |
| H31B | -0.0694 | 0.2066 | -0.0840 | 0.228 |
| H31C | -0.1337 | 0.2647 | -0.0373 | 0.228 |
| H32A | 0.2748  | 0.0837 | -0.0184 | 0.283 |
| H32B | 0.1667  | 0.0924 | -0.0729 | 0.283 |
| H32C | 0.0984  | 0.0346 | -0.0268 | 0.283 |
| H33A | 0.0193  | 0.3700 | -0.0018 | 0.264 |
| H33B | 0.0953  | 0.3917 | -0.0542 | 0.264 |
| H33C | 0.1919  | 0.4231 | -0.0003 | 0.264 |

## Crystal Structure Report for Compound 6ef

Single crystals of **compound 6ef** suitable for X-ray diffraction were obtained by slow evaporation of a solution of the compound in hexane at  $-18^{\circ}\text{C}$ . Details of the crystal structure, data acquisition and refining are given in the following table.

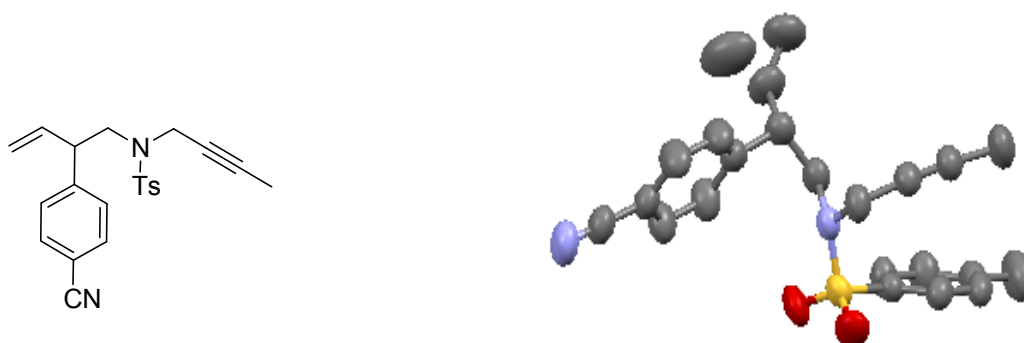

A colorless prismatic-like specimen of  $\text{C}_{22}\text{H}_{23}\text{N}_2\text{O}_2\text{S}$ , approximate dimensions 0.16 mm x 0.27 mm x 0.36 mm, was used for the X-ray crystallographic analysis. The X-ray intensity data were measured.

**Table 1: Data collection details for compound 6ef.**

| Axis  | dx/mm  | $2\theta/^{\circ}$ | $\omega/^{\circ}$ | $\varphi/^{\circ}$ | $\chi/^{\circ}$ | Width/ $^{\circ}$ | Frames | Time/s | Wavelength/ $\text{\AA}$ | Voltage/kV | Current/mA | Temperature/K |
|-------|--------|--------------------|-------------------|--------------------|-----------------|-------------------|--------|--------|--------------------------|------------|------------|---------------|
| Phi   | 35.105 | 20.50              | 12.48             | -347.51            | 28.87           | 0.50              | 739    | 60.00  | 0.71073                  | 50         | 30.0       | n/a           |
| Omega | 35.105 | 3.00               | 1.55              | 28.75              | -87.66          | 0.50              | 77     | 60.00  | 0.71073                  | 50         | 30.0       | n/a           |



| Axis | dx/mm  | 2 $\theta$ / $^{\circ}$ | $\omega$ / $^{\circ}$ | $\phi$ / $^{\circ}$ | $\chi$ / $^{\circ}$ | Width/ $^{\circ}$ | Frames | Time/s | Wavelength/ $\text{\AA}$ | Voltage/kV | Current/mA | Temperature/K |
|------|--------|-------------------------|-----------------------|---------------------|---------------------|-------------------|--------|--------|--------------------------|------------|------------|---------------|
| Phi  | 35.105 | -12.00                  | -14.73                | -313.05             | 82.04               | 0.50              | 739    | 60.00  | 0.71073                  | 50         | 30.0       | n/a           |

A total of 1555 frames were collected. The total exposure time was 25.92 hours. The frames were integrated with the Bruker SAINT software package using a narrow-frame algorithm. The integration of the data using an orthorhombic unit cell yielded a total of 40940 reflections to a maximum  $\theta$  angle of 25.39 $^{\circ}$  (0.83  $\text{\AA}$  resolution), of which 3871 were independent (average redundancy 10.576, completeness = 99.7%,  $R_{\text{int}}$  = 3.49%,  $R_{\text{sig}}$  = 1.92%) and 2891 (74.68%) were greater than  $2\sigma(F^2)$ . The final cell constants of  $a = 12.1138(10)$   $\text{\AA}$ ,  $b = 15.4374(14)$   $\text{\AA}$ ,  $c = 22.576(2)$   $\text{\AA}$ , volume = 4221.8(7)  $\text{\AA}^3$ , are based upon the refinement of the XYZ-centroids of 9885 reflections above  $20 \sigma(I)$  with  $5.277^{\circ} < 2\theta < 46.58^{\circ}$ . Data were corrected for absorption effects using the multi-scan method (SADABS). The ratio of minimum to maximum apparent transmission was 0.869. The calculated minimum and maximum transmission coefficients (based on crystal size) are 0.9409 and 0.9731.

The structure was solved and refined using the Bruker SHELXTL Software Package, using the space group P b c a, with  $Z = 8$  for the formula unit,  $C_{22}H_{23}N_2O_2S$ . The final anisotropic full-matrix least-squares refinement on  $F^2$  with 256 variables converged at  $R1 = 4.63\%$ , for the observed data and  $wR2 = 17.33\%$  for all data. The goodness-of-fit was 1.011. The largest peak in the final difference electron density synthesis was 0.254  $e/\text{\AA}^3$  and the largest hole was -0.237  $e/\text{\AA}^3$  with an RMS deviation of 0.073  $e/\text{\AA}^3$ . On the basis of the final model, the calculated density was 1.194  $\text{g/cm}^3$  and  $F(000)$ , 1608  $e^-$ .

**Table 2. Sample and crystal data for compound 6ef.**

|                               |                                |                       |
|-------------------------------|--------------------------------|-----------------------|
| <b>Identification code</b>    | <b>compound 6ef</b>            |                       |
| <b>Chemical formula</b>       | $C_{22}H_{23}N_2O_2S$          |                       |
| <b>Formula weight</b>         | 379.48                         |                       |
| <b>Temperature</b>            | 296(2) K                       |                       |
| <b>Wavelength</b>             | 0.71073 $\text{\AA}$           |                       |
| <b>Crystal size</b>           | 0.16 x 0.27 x 0.36 mm          |                       |
| <b>Crystal habit</b>          | colorless prismatic            |                       |
| <b>Crystal system</b>         | Orthorhombic                   |                       |
| <b>Space group</b>            | P b c a                        |                       |
| <b>Unit cell dimensions</b>   | $a = 12.1138(10)$ $\text{\AA}$ | $\alpha = 90^{\circ}$ |
|                               | $b = 15.4374(14)$ $\text{\AA}$ | $\beta = 90^{\circ}$  |
|                               | $c = 22.576(2)$ $\text{\AA}$   | $\gamma = 90^{\circ}$ |
| <b>Volume</b>                 | 4221.8(7) $\text{\AA}^3$       |                       |
| <b>Z</b>                      | 8                              |                       |
| <b>Density (calculated)</b>   | 1.194 $\text{Mg/cm}^3$         |                       |
| <b>Absorption coefficient</b> | 0.171 $\text{mm}^{-1}$         |                       |
| <b>F(000)</b>                 | 1608                           |                       |

**Table 3. Data collection and structure refinement for compound 6ef.**

|                                        |                                                                  |
|----------------------------------------|------------------------------------------------------------------|
| <b>Theta range for data collection</b> | 1.80 to 25.39 $^{\circ}$                                         |
| <b>Index ranges</b>                    | -14 $\leq h \leq$ 14, -18 $\leq k \leq$ 18, -27 $\leq l \leq$ 27 |
| <b>Reflections collected</b>           | 40940                                                            |

|                                            |                                                                                                                         |
|--------------------------------------------|-------------------------------------------------------------------------------------------------------------------------|
| <b>Independent reflections</b>             | 3871 [R(int) = 0.0349]                                                                                                  |
| <b>Coverage of independent reflections</b> | 99.7%                                                                                                                   |
| <b>Absorption correction</b>               | multi-scan                                                                                                              |
| <b>Max. and min. transmission</b>          | 0.9731 and 0.9409                                                                                                       |
| <b>Structure solution technique</b>        | direct methods                                                                                                          |
| <b>Structure solution program</b>          | SHELXS-97 (Sheldrick, 2008)                                                                                             |
| <b>Refinement method</b>                   | Full-matrix least-squares on F <sup>2</sup>                                                                             |
| <b>Refinement program</b>                  | SHELXL-97 (Sheldrick, 2008)                                                                                             |
| <b>Function minimized</b>                  | $\Sigma w(F_o^2 - F_c^2)^2$                                                                                             |
| <b>Data / restraints / parameters</b>      | 3871 / 0 / 256                                                                                                          |
| <b>Goodness-of-fit on F<sup>2</sup></b>    | 1.011                                                                                                                   |
| <b><math>\Delta/\sigma_{\max}</math></b>   | 0.025                                                                                                                   |
| <b>Final R indices</b>                     | 2891 data; I>2 $\sigma$ (I) R1 = 0.0463, wR2 = 0.1445                                                                   |
|                                            | all data R1 = 0.0678, wR2 = 0.1733                                                                                      |
| <b>Weighting scheme</b>                    | w=1/[ $\sigma^2(F_o^2)+(0.1142P)^2+0.8202P$ ]<br>where P=(F <sub>o</sub> <sup>2</sup> +2F <sub>c</sub> <sup>2</sup> )/3 |
| <b>Largest diff. peak and hole</b>         | 0.254 and -0.237 eÅ <sup>-3</sup>                                                                                       |
| <b>R.M.S. deviation from mean</b>          | 0.073 eÅ <sup>-3</sup>                                                                                                  |

**Table 4. Atomic coordinates and equivalent isotropic atomic displacement parameters (Å<sup>2</sup>) for compound 6ef.**

U(eq) is defined as one third of the trace of the orthogonalized U<sub>ij</sub> tensor.

|     | <b>x/a</b>       | <b>y/b</b>       | <b>z/c</b>       | <b>U(eq)</b> |
|-----|------------------|------------------|------------------|--------------|
| C1  | 0.66423(18)<br>) | 0.79852(13)<br>) | 0.00611(10)<br>) | 0.0545(5)    |
| C2  | 0.5742(2)<br>)   | 0.81397(16)<br>) | 0.97035(12)<br>) | 0.0695(7)    |
| C3  | 0.5624(2)<br>)   | 0.89341(18)<br>) | 0.94390(13)<br>) | 0.0816(8)    |
| C4  | 0.6381(2)<br>)   | 0.95934(17)<br>) | 0.95248(11)<br>) | 0.0731(7)    |
| C5  | 0.7277(2)<br>)   | 0.94313(15)<br>) | 0.98884(11)<br>) | 0.0699(7)    |
| C6  | 0.74171(18)<br>) | 0.86374(15)<br>) | 0.01562(10)<br>) | 0.0615(6)    |
| C8  | 0.5169(3)<br>)   | 0.45881(18)<br>) | 0.22446(12)<br>) | 0.0814(8)    |
| C9  | 0.4994(2)<br>)   | 0.54645(17)<br>) | 0.21884(11)<br>) | 0.0754(7)    |
| C10 | 0.46967(17)<br>) | 0.58187(15)<br>) | 0.16541(10)<br>) | 0.0600(6)    |
| C11 | 0.4611(2)<br>)   | 0.52787(17)<br>) | 0.11690(12)<br>) | 0.0754(7)    |

|      | x/a         | y/b         | z/c         | U(eq)      |
|------|-------------|-------------|-------------|------------|
| C12  | 0.4785(2)   | 0.43944(16) | 0.12162(12) | 0.0746(7)  |
| C13  | 0.50583(18) | 0.40474(15) | 0.17602(11) | 0.0620(6)  |
| C14  | 0.68707(19) | 0.73847(15) | 0.15611(11) | 0.0633(6)  |
| C15  | 0.50290(18) | 0.72178(14) | 0.10818(11) | 0.0619(6)  |
| C16  | 0.44577(19) | 0.67826(16) | 0.16071(12) | 0.0672(6)  |
| C17  | 0.5231(2)   | 0.31267(18) | 0.18137(12) | 0.0716(7)  |
| C18  | 0.6244(4)   | 0.0462(2)   | 0.92261(16) | 0.1123(11) |
| C19  | 0.6939(2)   | 0.90984(16) | 0.16048(11) | 0.0667(6)  |
| C20  | 0.7045(3)   | 0.00452(17) | 0.15831(16) | 0.0943(9)  |
| C21  | 0.68823(18) | 0.83336(16) | 0.15981(10) | 0.0619(6)  |
| C22  | 0.3232(2)   | 0.6957(2)   | 0.15550(17) | 0.0952(10) |
| N1   | 0.5355(2)   | 0.23918(16) | 0.18559(12) | 0.0885(7)  |
| N4   | 0.62191(14) | 0.70290(10) | 0.10679(8)  | 0.0547(5)  |
| O1   | 0.79379(14) | 0.68187(12) | 0.05076(9)  | 0.0827(6)  |
| O2   | 0.61498(17) | 0.63625(10) | 0.00823(8)  | 0.0792(5)  |
| S1   | 0.67919(5)  | 0.69731(3)  | 0.04123(3)  | 0.0600(2)  |
| C23A | 0.2685(4)   | 0.7511(5)   | 0.1843(3)   | 0.114(2)   |
| C23B | 0.2507(13)  | 0.6504(16)  | 0.1777(8)   | 0.160(10)  |

**Table 5. Bond lengths (Å) for compound 6ef.**

|         |          |         |          |
|---------|----------|---------|----------|
| C1-C2   | 1.377(3) | C1-C6   | 1.393(3) |
| C1-S1   | 1.762(2) | C2-C3   | 1.371(4) |
| C2-H2   | 0.93     | C3-C4   | 1.383(4) |
| C3-H3   | 0.93     | C4-C5   | 1.384(4) |
| C4-C18  | 1.510(4) | C5-C6   | 1.377(3) |
| C5-H5   | 0.93     | C6-H6   | 0.93     |
| C8-C9   | 1.375(4) | C8-C13  | 1.382(4) |
| C8-H8   | 0.93     | C9-C10  | 1.372(3) |
| C9-H9   | 0.93     | C10-C11 | 1.380(3) |
| C10-C16 | 1.520(3) | C11-C12 | 1.385(3) |
| C11-H11 | 0.93     | C12-C13 | 1.380(3) |
| C12-H12 | 0.93     | C13-C17 | 1.442(3) |

|           |            |           |            |
|-----------|------------|-----------|------------|
| C14-C21   | 1.467(3)   | C14-N4    | 1.471(3)   |
| C14-H14A  | 0.97       | C14-H14B  | 0.97       |
| C15-N4    | 1.471(3)   | C15-C16   | 1.529(3)   |
| C15-H15A  | 0.97       | C15-H15B  | 0.97       |
| C16-C22   | 1.513(4)   | C16-H16   | 0.98       |
| C17-N1    | 1.148(3)   | C18-H18A  | 0.96       |
| C18-H18B  | 0.96       | C18-H18C  | 0.96       |
| C19-C21   | 1.183(3)   | C19-C20   | 1.468(3)   |
| C20-H20A  | 0.96       | C20-H20B  | 0.96       |
| C20-H20C  | 0.96       | C22-C23B  | 1.23(2)    |
| C22-C23A  | 1.263(6)   | C22-H22A  | 0.93       |
| C22-H22B  | 0.93       | N4-S1     | 1.637(2)   |
| O1-S1     | 1.4249(18) | O2-S1     | 1.4313(18) |
| C23A-H23A | 0.93       | C23A-H23B | 0.93       |
| C23B-H23C | 0.93       | C23B-H23D | 0.93       |

**Table 6. Bond angles (°) for compound 6ef.**

|              |            |               |            |
|--------------|------------|---------------|------------|
| C2-C1-C6     | 119.9(2)   | C2-C1-S1      | 119.92(17) |
| C6-C1-S1     | 120.15(18) | C3-C2-C1      | 119.5(2)   |
| C3-C2-H2     | 120.2      | C1-C2-H2      | 120.2      |
| C2-C3-C4     | 121.9(2)   | C2-C3-H3      | 119.1      |
| C4-C3-H3     | 119.1      | C5-C4-C3      | 118.0(2)   |
| C5-C4-C18    | 120.8(3)   | C3-C4-C18     | 121.2(3)   |
| C6-C5-C4     | 121.2(2)   | C6-C5-H5      | 119.4      |
| C4-C5-H5     | 119.4      | C5-C6-C1      | 119.5(2)   |
| C5-C6-H6     | 120.2      | C1-C6-H6      | 120.2      |
| C9-C8-C13    | 120.4(2)   | C9-C8-H8      | 119.8      |
| C13-C8-H8    | 119.8      | C10-C9-C8     | 120.9(2)   |
| C10-C9-H9    | 119.6      | C8-C9-H9      | 119.6      |
| C9-C10-C11   | 118.5(2)   | C9-C10-C16    | 120.1(2)   |
| C11-C10-C16  | 121.4(2)   | C10-C11-C12   | 121.5(2)   |
| C10-C11-H11  | 119.2      | C12-C11-H11   | 119.2      |
| C13-C12-C11  | 119.2(2)   | C13-C12-H12   | 120.4      |
| C11-C12-H12  | 120.4      | C12-C13-C8    | 119.5(2)   |
| C12-C13-C17  | 119.5(2)   | C8-C13-C17    | 121.0(2)   |
| C21-C14-N4   | 114.88(18) | C21-C14-H14A  | 108.5      |
| N4-C14-H14A  | 108.5      | C21-C14-H14B  | 108.5      |
| N4-C14-H14B  | 108.5      | H14A-C14-H14B | 107.5      |
| N4-C15-C16   | 111.91(18) | N4-C15-H15A   | 109.2      |
| C16-C15-H15A | 109.2      | N4-C15-H15B   | 109.2      |
| C16-C15-H15B | 109.2      | H15A-C15-H15B | 107.9      |
| C22-C16-C10  | 111.5(2)   | C22-C16-C15   | 107.8(2)   |
| C10-C16-C15  | 113.47(19) | C22-C16-H16   | 108.0      |
| C10-C16-H16  | 108.0      | C15-C16-H16   | 108.0      |
| N1-C17-C13   | 179.1(3)   | C4-C18-H18A   | 109.5      |
| C4-C18-H18B  | 109.5      | H18A-C18-H18B | 109.5      |
| C4-C18-H18C  | 109.5      | H18A-C18-H18C | 109.5      |

|                |            |                |            |
|----------------|------------|----------------|------------|
| H18B-C18-H18C  | 109.5      | C21-C19-C20    | 176.9(3)   |
| C19-C20-H20A   | 109.5      | C19-C20-H20B   | 109.5      |
| H20A-C20-H20B  | 109.5      | C19-C20-H20C   | 109.5      |
| H20A-C20-H20C  | 109.5      | H20B-C20-H20C  | 109.5      |
| C19-C21-C14    | 176.2(3)   | C23B-C22-C23A  | 78.4(10)   |
| C23B-C22-C16   | 124.6(7)   | C23A-C22-C16   | 126.6(4)   |
| C23B-C22-H22A  | 65.8       | C23A-C22-H22A  | 116.7      |
| C16-C22-H22A   | 116.7      | C23B-C22-H22B  | 117.7      |
| C23A-C22-H22B  | 64.8       | C16-C22-H22B   | 117.7      |
| H22A-C22-H22B  | 87.5       | C14-N4-C15     | 115.83(18) |
| C14-N4-S1      | 118.46(15) | C15-N4-S1      | 116.43(15) |
| O1-S1-O2       | 119.86(12) | O1-S1-N4       | 106.58(11) |
| O2-S1-N4       | 105.96(11) | O1-S1-C1       | 108.46(11) |
| O2-S1-C1       | 107.09(11) | N4-S1-C1       | 108.46(9)  |
| C22-C23A-H23A  | 120.0      | C22-C23A-H23B  | 120.0      |
| H23A-C23A-H23B | 120.0      | C22-C23B-H23C  | 120.0      |
| C22-C23B-H23D  | 120.0      | H23C-C23B-H23D | 120.0      |

**Table 7. Anisotropic atomic displacement parameters ( $\text{\AA}^2$ ) for compound 6ef.**

The anisotropic atomic displacement factor exponent takes the form:  $-2\pi^2[h^2 a^{*2} U_{11} + \dots + 2 h k a^* b^* U_{12}]$

|      | $U_{11}$   | $U_{22}$   | $U_{33}$   | $U_{23}$    | $U_{13}$    | $U_{12}$    |
|------|------------|------------|------------|-------------|-------------|-------------|
| C1   | 0.0557(12) | 0.0479(12) | 0.0600(13) | -0.0038(9)  | 0.0052(9)   | 0.0033(9)   |
| C2   | 0.0643(14) | 0.0582(14) | 0.0860(17) | 0.0049(12)  | -0.0152(12) | -0.0063(10) |
| C3   | 0.0782(17) | 0.0688(17) | 0.098(2)   | 0.0119(14)  | -0.0214(14) | 0.0042(13)  |
| C4   | 0.0917(18) | 0.0557(14) | 0.0719(16) | 0.0054(11)  | 0.0039(13)  | 0.0019(13)  |
| C5   | 0.0839(17) | 0.0572(14) | 0.0687(15) | -0.0044(11) | 0.0086(12)  | -0.0166(12) |
| C6   | 0.0588(13) | 0.0631(14) | 0.0626(13) | -0.0001(11) | -0.0001(10) | -0.0067(10) |
| C8   | 0.110(2)   | 0.0752(18) | 0.0592(14) | 0.0113(13)  | 0.0019(13)  | 0.0014(15)  |
| C9   | 0.0953(18) | 0.0721(17) | 0.0589(14) | 0.0020(12)  | 0.0085(12)  | -0.0009(14) |
| C10  | 0.0479(11) | 0.0625(14) | 0.0697(14) | -0.0009(11) | 0.0036(9)   | -0.0024(9)  |
| C11  | 0.0863(17) | 0.0680(16) | 0.0719(16) | 0.0095(13)  | -0.0213(13) | -0.0011(13) |
| C12  | 0.0858(17) | 0.0643(16) | 0.0737(16) | -0.0028(12) | -0.0164(13) | -0.0084(12) |
| C13  | 0.0552(12) | 0.0606(14) | 0.0703(15) | 0.0099(11)  | 0.0025(10)  | -0.0064(10) |
| C14  | 0.0659(14) | 0.0541(13) | 0.0698(14) | 0.0067(11)  | -0.0107(11) | -0.0028(10) |
| C15  | 0.0548(12) | 0.0518(12) | 0.0790(15) | 0.0042(11)  | -0.0030(10) | 0.0083(9)   |
| C16  | 0.0570(13) | 0.0649(15) | 0.0797(16) | -0.0029(12) | 0.0032(11)  | 0.0068(10)  |
| C17  | 0.0640(14) | 0.0681(17) | 0.0826(17) | 0.0130(13)  | 0.0006(12)  | -0.0091(12) |
| C18  | 0.162(3)   | 0.0621(17) | 0.113(3)   | 0.0201(17)  | -0.005(2)   | 0.0034(19)  |
| C19  | 0.0672(14) | 0.0575(15) | 0.0756(16) | -0.0057(12) | 0.0013(11)  | -0.0029(11) |
| C20  | 0.0908(19) | 0.0556(15) | 0.136(3)   | -0.0071(17) | 0.0062(18)  | -0.0050(14) |
| C21  | 0.0616(13) | 0.0603(14) | 0.0639(14) | -0.0041(11) | -0.0017(10) | -0.0032(10) |
| C22  | 0.0572(16) | 0.103(2)   | 0.125(3)   | 0.013(2)    | 0.0144(16)  | 0.0143(15)  |
| N1   | 0.0870(16) | 0.0648(15) | 0.1138(19) | 0.0188(13)  | -0.0007(13) | -0.0066(12) |
| N4   | 0.0517(10) | 0.0441(10) | 0.0682(12) | 0.0011(8)   | -0.0044(8)  | 0.0003(7)   |
| O1   | 0.0617(10) | 0.0788(12) | 0.1075(15) | 0.0063(10)  | 0.0071(9)   | 0.0260(9)   |
| O2   | 0.1052(13) | 0.0470(9)  | 0.0854(12) | -0.0137(8)  | -0.0076(10) | -0.0018(9)  |
| S1   | 0.0610(4)  | 0.0453(3)  | 0.0738(4)  | -0.0037(2)  | 0.0011(2)   | 0.0091(2)   |
| C23A | 0.070(3)   | 0.132(6)   | 0.138(4)   | -0.012(4)   | 0.019(3)    | 0.029(3)    |

|      | $U_{11}$  | $U_{22}$ | $U_{33}$  | $U_{23}$  | $U_{13}$ | $U_{12}$  |
|------|-----------|----------|-----------|-----------|----------|-----------|
| C23B | 0.103(11) | 0.21(2)  | 0.168(15) | 0.051(14) | 0.033(9) | 0.067(12) |

**Table 8. Hydrogen atomic coordinates and isotropic atomic displacement parameters ( $\text{\AA}^2$ ) for compound 6ef.**

|      | x/a    | y/b    | z/c     | U(eq)    |
|------|--------|--------|---------|----------|
| H2   | 0.5219 | 0.7709 | -0.0358 | 0.083    |
| H3   | 0.5019 | 0.9032 | -0.0805 | 0.098    |
| H5   | 0.7795 | 0.9866 | -0.0047 | 0.084    |
| H6   | 0.8024 | 0.8537 | 0.0399  | 0.074    |
| H8   | 0.5364 | 0.4358 | 0.2611  | 0.098    |
| H9   | 0.5078 | 0.5822 | 0.2517  | 0.091    |
| H11  | 0.4433 | 0.5514 | 0.0802  | 0.09     |
| H12  | 0.4718 | 0.4039 | 0.0886  | 0.09     |
| H14A | 0.6580 | 0.7156 | 0.1930  | 0.076    |
| H14B | 0.7625 | 0.7182 | 0.1523  | 0.076    |
| H15A | 0.4693 | 0.7017 | 0.0717  | 0.074    |
| H15B | 0.4921 | 0.7839 | 0.1106  | 0.074    |
| H16  | 0.4723 | 0.7061 | 0.1970  | 0.081    |
| H18A | 0.6522 | 1.0910 | -0.0519 | 0.168    |
| H18B | 0.5476 | 1.0563 | -0.0852 | 0.168    |
| H18C | 0.6647 | 1.0465 | -0.1140 | 0.168    |
| H20A | 0.7569 | 1.0203 | 0.1283  | 0.141    |
| H20B | 0.7295 | 1.0255 | 0.1960  | 0.141    |
| H20C | 0.6341 | 1.0298 | 0.1492  | 0.141    |
| H22A | 0.2843 | 0.6622 | 0.1283  | 0.696(9) |
| H22B | 0.3012 | 0.7440 | 0.1340  | 0.304    |
| H23A | 0.2070 | 0.7340 | 0.2060  | 0.136    |
| H23B | 0.2897 | 0.8090 | 0.1839  | 0.136    |
| H23C | 0.1973 | 0.6754 | 0.2019  | 0.192    |
| H23D | 0.2492 | 0.5911 | 0.1703  | 0.192    |

## Calculations

### Computational methods

Calculations were performed with Gaussian 09<sup>15</sup> at DFT level and in the presence of a solvent (xylene-mixture) at the Polarizable Continuum Model (PCM) using the integral equation formalism variant (IEFPCM).<sup>16</sup> The geometries of all structures here reported were optimized using the M06 hybrid functional.<sup>17</sup> Optimizations were carried out using the standard 6-31G(d) basis set for C, H, N and O. The LANL2DZ basis set, which includes the relativistic effective core potential (ECP) of Hay and Wadt and employs a split-valence (double- $\zeta$ ) basis set, was used for Pd.<sup>18</sup> Minima were characterized by calculation of the Hessian eigenvalues. Electronic energies were corrected with the zero-point vibrational energy (ZPE) without scaling.

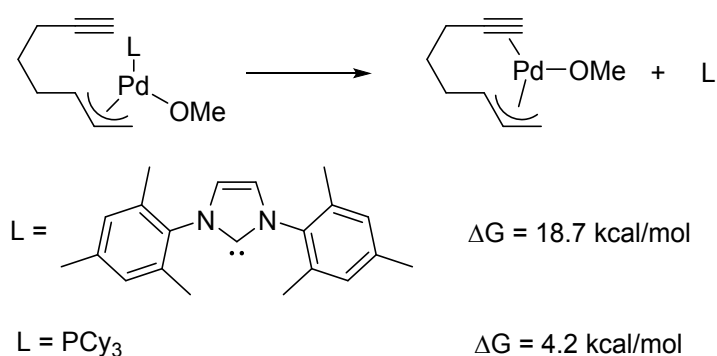

**M06/6-31G(d) (C, N, O, H) LANL2DZ (Pd), PCM (Xylene-mixture)**

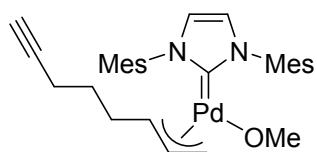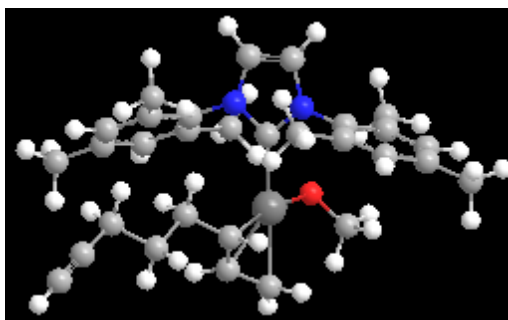

| Center Number | Atomic Number | Atomic Type | Coordinates (Angstroms) |          |           |
|---------------|---------------|-------------|-------------------------|----------|-----------|
|               |               |             | X                       | Y        | Z         |
| 1             | 6             | 0           | -4.717838               | 4.487254 | -0.180538 |
| 2             | 6             | 0           | -5.407327               | 5.441349 | 0.091175  |
| 3             | 6             | 0           | -3.867268               | 3.344237 | -0.482697 |
| 4             | 6             | 0           | -2.724152               | 3.170090 | 0.519457  |
| 5             | 6             | 0           | -1.860143               | 1.961009 | 0.174982  |

|    |    |   |           |           |           |
|----|----|---|-----------|-----------|-----------|
| 6  | 6  | 0 | -0.723201 | 1.758742  | 1.132624  |
| 7  | 46 | 0 | 0.362142  | -0.127791 | 1.281061  |
| 8  | 6  | 0 | -0.956109 | 1.174998  | 2.403314  |
| 9  | 6  | 0 | 0.115481  | 0.847390  | 3.243563  |
| 10 | 6  | 0 | 0.565715  | -0.748982 | -0.688221 |
| 11 | 7  | 0 | -0.270874 | -1.529443 | -1.419829 |
| 12 | 6  | 0 | 0.303243  | -1.889615 | -2.633681 |
| 13 | 6  | 0 | 1.527750  | -1.318636 | -2.662625 |
| 14 | 7  | 0 | 1.669165  | -0.625189 | -1.466103 |
| 15 | 6  | 0 | 2.828522  | 0.139575  | -1.110617 |
| 16 | 6  | 0 | -1.603441 | -1.865570 | -1.014969 |
| 17 | 6  | 0 | 3.916503  | -0.516935 | -0.527672 |
| 18 | 6  | 0 | 5.032031  | 0.255430  | -0.203189 |
| 19 | 6  | 0 | 5.075359  | 1.627851  | -0.444252 |
| 20 | 6  | 0 | 3.969116  | 2.238408  | -1.036990 |
| 21 | 6  | 0 | 2.830342  | 1.512211  | -1.377936 |
| 22 | 6  | 0 | -1.795651 | -2.911848 | -0.104314 |
| 23 | 6  | 0 | -3.103622 | -3.174131 | 0.300363  |
| 24 | 6  | 0 | -4.188623 | -2.433201 | -0.170568 |
| 25 | 6  | 0 | -3.952780 | -1.422900 | -1.101560 |
| 26 | 6  | 0 | -2.664321 | -1.126544 | -1.546915 |
| 27 | 6  | 0 | 1.643519  | 2.179345  | -2.004776 |
| 28 | 6  | 0 | 3.869442  | -1.986355 | -0.248922 |
| 29 | 6  | 0 | 6.278397  | 2.437279  | -0.060925 |
| 30 | 6  | 0 | -5.576028 | -2.717248 | 0.322868  |
| 31 | 6  | 0 | -2.439842 | -0.067532 | -2.585304 |
| 32 | 6  | 0 | -0.646074 | -3.728577 | 0.398184  |
| 33 | 8  | 0 | 1.477008  | -1.817059 | 1.799947  |
| 34 | 6  | 0 | 2.364396  | -1.631713 | 2.837595  |
| 35 | 1  | 0 | -6.017369 | 6.285855  | 0.332429  |
| 36 | 1  | 0 | -4.474808 | 2.423922  | -0.502687 |
| 37 | 1  | 0 | -3.449480 | 3.451502  | -1.497087 |
| 38 | 1  | 0 | -2.110010 | 4.083356  | 0.540088  |
| 39 | 1  | 0 | -3.139697 | 3.054666  | 1.532408  |
| 40 | 1  | 0 | -2.488209 | 1.053250  | 0.155182  |
| 41 | 1  | 0 | -1.465782 | 2.080621  | -0.847154 |
| 42 | 1  | 0 | 0.108143  | 2.470176  | 1.051502  |
| 43 | 1  | 0 | -1.936037 | 0.723469  | 2.588153  |
| 44 | 1  | 0 | -0.052067 | 0.229071  | 4.123321  |
| 45 | 1  | 0 | 1.024301  | 1.453601  | 3.249739  |
| 46 | 1  | 0 | -0.220545 | -2.512821 | -3.346682 |
| 47 | 1  | 0 | 2.315023  | -1.334278 | -3.405062 |
| 48 | 1  | 0 | 5.893043  | -0.234763 | 0.255376  |
| 49 | 1  | 0 | 3.993994  | 3.310212  | -1.243580 |
| 50 | 1  | 0 | -3.279074 | -3.985768 | 1.009244  |
| 51 | 1  | 0 | -4.793483 | -0.848087 | -1.495966 |
| 52 | 1  | 0 | 1.881413  | 3.208013  | -2.298949 |
| 53 | 1  | 0 | 1.293384  | 1.639656  | -2.896014 |
| 54 | 1  | 0 | 0.796179  | 2.215558  | -1.303827 |
| 55 | 1  | 0 | 3.786460  | -2.573528 | -1.175134 |
| 56 | 1  | 0 | 4.778112  | -2.310292 | 0.272884  |
| 57 | 1  | 0 | 2.991219  | -2.217529 | 0.380633  |
| 58 | 1  | 0 | 7.184278  | 1.820034  | -0.024313 |
| 59 | 1  | 0 | 6.453196  | 3.258167  | -0.767743 |
| 60 | 1  | 0 | 6.152581  | 2.888903  | 0.933201  |
| 61 | 1  | 0 | -5.747360 | -2.260640 | 1.307837  |
| 62 | 1  | 0 | -6.336876 | -2.319053 | -0.359235 |
| 63 | 1  | 0 | -5.749770 | -3.794823 | 0.436535  |
| 64 | 1  | 0 | -3.281461 | 0.635062  | -2.613181 |



|    |   |   |           |           |           |
|----|---|---|-----------|-----------|-----------|
| 65 | 1 | 0 | -1.520928 | 0.504967  | -2.400325 |
| 66 | 1 | 0 | -2.345974 | -0.505419 | -3.589815 |
| 67 | 1 | 0 | -0.027536 | -4.093804 | -0.434514 |
| 68 | 1 | 0 | 0.026219  | -3.147618 | 1.052987  |
| 69 | 1 | 0 | -1.010621 | -4.599138 | 0.956476  |
| 70 | 1 | 0 | 1.880028  | -1.389306 | 3.808674  |
| 71 | 1 | 0 | 2.956680  | -2.555374 | 3.006894  |
| 72 | 1 | 0 | 3.109840  | -0.822825 | 2.656130  |

```

-----
Zero-point correction=                0.606382 (Hartree/Particle)
Thermal correction to Energy=         0.643805
Thermal correction to Enthalpy=       0.644749
Thermal correction to Gibbs Free Energy= 0.537362
Sum of electronic and zero-point Energies= -1475.831495
Sum of electronic and thermal Energies= -1475.794073
Sum of electronic and thermal Enthalpies= -1475.793129
Sum of electronic and thermal Free Energies= -1475.900515

```

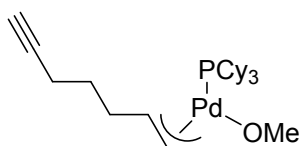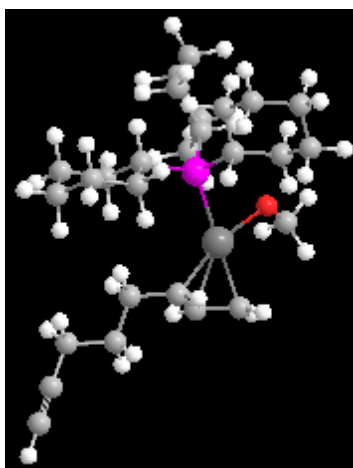

```

-----

```

| Center Number | Atomic Number | Atomic Type | Coordinates (Angstroms) |           |           |
|---------------|---------------|-------------|-------------------------|-----------|-----------|
|               |               |             | X                       | Y         | Z         |
| 1             | 6             | 0           | 4.824246                | -0.467047 | -0.333439 |
| 2             | 6             | 0           | 3.352795                | -0.211261 | -0.011520 |
| 3             | 6             | 0           | 2.461151                | -1.243382 | -0.637345 |
| 4             | 46            | 0           | 0.301348                | -1.693355 | -0.217760 |
| 5             | 6             | 0           | 2.327716                | -2.511272 | -0.031801 |
| 6             | 6             | 0           | 1.494474                | -3.491173 | -0.585856 |
| 7             | 15            | 0           | -0.971197               | 0.331304  | -0.040080 |
| 8             | 6             | 0           | 5.727418                | 0.635482  | 0.223308  |
| 9             | 6             | 0           | 7.140080                | 0.386505  | -0.028701 |
| 10            | 6             | 0           | 8.304870                | 0.156865  | -0.252141 |
| 11            | 6             | 0           | -2.310618               | 0.114490  | 1.242241  |
| 12            | 6             | 0           | -0.155302               | 1.959430  | 0.343852  |
| 13            | 6             | 0           | -1.837947               | 0.669933  | -1.661994 |
| 14            | 6             | 0           | -2.987160               | 1.392508  | 1.745276  |
| 15            | 6             | 0           | -4.170365               | 1.047833  | 2.647639  |
| 16            | 6             | 0           | -3.738492               | 0.173491  | 3.818974  |
| 17            | 6             | 0           | -3.021732               | -1.081183 | 3.332822  |
| 18            | 6             | 0           | -1.843260               | -0.736559 | 2.429004  |
| 19            | 6             | 0           | 0.713377                | 2.437960  | -0.823044 |
| 20            | 6             | 0           | 1.449648                | 3.731777  | -0.484120 |

```

-----

```

|    |   |   |           |           |           |
|----|---|---|-----------|-----------|-----------|
| 21 | 6 | 0 | 2.255344  | 3.615796  | 0.803946  |
| 22 | 6 | 0 | 1.362206  | 3.178658  | 1.957318  |
| 23 | 6 | 0 | 0.661366  | 1.862887  | 1.636208  |
| 24 | 6 | 0 | -2.684543 | 1.944680  | -1.743025 |
| 25 | 6 | 0 | -3.111975 | 2.205189  | -3.185571 |
| 26 | 6 | 0 | -3.891520 | 1.023314  | -3.750298 |
| 27 | 6 | 0 | -3.104234 | -0.274655 | -3.611936 |
| 28 | 6 | 0 | -2.664126 | -0.516249 | -2.170686 |
| 29 | 8 | 0 | -1.594640 | -2.541891 | -0.123390 |
| 30 | 6 | 0 | -1.698275 | -3.821308 | 0.372319  |
| 31 | 1 | 0 | 5.131824  | -1.439963 | 0.079547  |
| 32 | 1 | 0 | 4.963772  | -0.538039 | -1.422893 |
| 33 | 1 | 0 | 3.084720  | 0.797019  | -0.360718 |
| 34 | 1 | 0 | 3.216626  | -0.204863 | 1.083733  |
| 35 | 1 | 0 | 2.380728  | -1.196930 | -1.730030 |
| 36 | 1 | 0 | 2.668008  | -2.623818 | 1.002274  |
| 37 | 1 | 0 | 1.257325  | -4.388284 | -0.017205 |
| 38 | 1 | 0 | 1.359686  | -3.559884 | -1.667386 |
| 39 | 1 | 0 | 5.438667  | 1.602078  | -0.219791 |
| 40 | 1 | 0 | 5.554826  | 0.738779  | 1.306906  |
| 41 | 1 | 0 | 9.336720  | -0.044137 | -0.448451 |
| 42 | 1 | 0 | -3.054202 | -0.494495 | 0.699571  |
| 43 | 1 | 0 | -0.952618 | 2.707853  | 0.503510  |
| 44 | 1 | 0 | -0.985295 | 0.784296  | -2.358320 |
| 45 | 1 | 0 | -2.263296 | 1.991452  | 2.325548  |
| 46 | 1 | 0 | -3.320142 | 2.028694  | 0.914126  |
| 47 | 1 | 0 | -4.648006 | 1.969765  | 3.009751  |
| 48 | 1 | 0 | -4.930318 | 0.512345  | 2.053684  |
| 49 | 1 | 0 | -3.053149 | 0.752133  | 4.462496  |
| 50 | 1 | 0 | -4.605309 | -0.089971 | 4.441815  |
| 51 | 1 | 0 | -2.682369 | -1.686576 | 4.185565  |
| 52 | 1 | 0 | -3.725973 | -1.711336 | 2.761708  |
| 53 | 1 | 0 | -1.083361 | -0.185425 | 3.011044  |
| 54 | 1 | 0 | -1.371180 | -1.649668 | 2.046158  |
| 55 | 1 | 0 | 1.433387  | 1.644040  | -1.084736 |
| 56 | 1 | 0 | 0.100781  | 2.597323  | -1.722193 |
| 57 | 1 | 0 | 2.095848  | 4.024526  | -1.323863 |
| 58 | 1 | 0 | 0.706366  | 4.539376  | -0.367175 |
| 59 | 1 | 0 | 3.060092  | 2.871555  | 0.670515  |
| 60 | 1 | 0 | 2.748933  | 4.570513  | 1.033707  |
| 61 | 1 | 0 | 1.943081  | 3.079491  | 2.885083  |
| 62 | 1 | 0 | 0.602749  | 3.957683  | 2.143768  |
| 63 | 1 | 0 | 1.412515  | 1.062046  | 1.529262  |
| 64 | 1 | 0 | 0.014674  | 1.567038  | 2.475330  |
| 65 | 1 | 0 | -3.588027 | 1.812461  | -1.124283 |
| 66 | 1 | 0 | -2.154622 | 2.822170  | -1.344145 |
| 67 | 1 | 0 | -3.710853 | 3.125659  | -3.241324 |
| 68 | 1 | 0 | -2.210325 | 2.380509  | -3.798529 |
| 69 | 1 | 0 | -4.842128 | 0.927424  | -3.197850 |
| 70 | 1 | 0 | -4.158679 | 1.206310  | -4.800978 |
| 71 | 1 | 0 | -3.702162 | -1.125470 | -3.968424 |
| 72 | 1 | 0 | -2.210414 | -0.229540 | -4.258202 |
| 73 | 1 | 0 | -3.559233 | -0.628855 | -1.534658 |
| 74 | 1 | 0 | -2.110311 | -1.457049 | -2.065147 |
| 75 | 1 | 0 | -1.229636 | -3.960731 | 1.373930  |
| 76 | 1 | 0 | -2.767494 | -4.090130 | 0.499030  |
| 77 | 1 | 0 | -1.259971 | -4.603740 | -0.285069 |

-----  
Zero-point correction=

0.691501 (Hartree/Particle)

Thermal correction to Energy= 0.725945  
 Thermal correction to Enthalpy= 0.726889  
 Thermal correction to Gibbs Free Energy= 0.625552  
 Sum of electronic and zero-point Energies= -1598.837538  
 Sum of electronic and thermal Energies= -1598.803094  
 Sum of electronic and thermal Enthalpies= -1598.802150  
 Sum of electronic and thermal Free Energies= -1598.903487

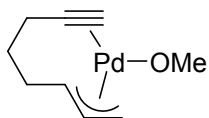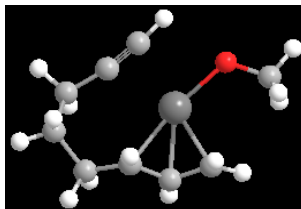

| Center Number | Atomic Number | Atomic Type | Coordinates (Angstroms) |           |           |
|---------------|---------------|-------------|-------------------------|-----------|-----------|
|               |               |             | X                       | Y         | Z         |
| 1             | 6             | 0           | -1.196967               | -1.713631 | 0.065685  |
| 2             | 6             | 0           | -0.104551               | -2.186475 | -0.231881 |
| 3             | 6             | 0           | -2.573888               | -1.374207 | 0.416226  |
| 4             | 6             | 0           | -3.161607               | -0.155119 | -0.298300 |
| 5             | 6             | 0           | -2.546585               | 1.170528  | 0.143450  |
| 6             | 6             | 0           | -1.167585               | 1.408822  | -0.381070 |
| 7             | 46            | 0           | 0.512472                | -0.025873 | -0.029826 |
| 8             | 6             | 0           | -0.147647               | 1.997062  | 0.384494  |
| 9             | 6             | 0           | 1.173958                | 1.998131  | -0.118088 |
| 10            | 8             | 0           | 2.311580                | -1.030829 | 0.003852  |
| 11            | 6             | 0           | 3.473089                | -0.302923 | 0.133725  |
| 12            | 1             | 0           | 0.818893                | -2.695631 | -0.439991 |
| 13            | 1             | 0           | -3.194078               | -2.254344 | 0.191542  |
| 14            | 1             | 0           | -2.639558               | -1.222726 | 1.505329  |
| 15            | 1             | 0           | -3.050595               | -0.275437 | -1.386761 |
| 16            | 1             | 0           | -4.239958               | -0.137127 | -0.091875 |
| 17            | 1             | 0           | -3.199691               | 1.984613  | -0.210995 |
| 18            | 1             | 0           | -2.545040               | 1.230988  | 1.243907  |
| 19            | 1             | 0           | -1.069069               | 1.434586  | -1.472114 |
| 20            | 1             | 0           | -0.327705               | 2.196096  | 1.443439  |
| 21            | 1             | 0           | 1.998310                | 2.279914  | 0.535196  |
| 22            | 1             | 0           | 1.354608                | 2.126466  | -1.187810 |
| 23            | 1             | 0           | 3.538272                | 0.279733  | 1.079167  |
| 24            | 1             | 0           | 4.345592                | -0.986476 | 0.136046  |
| 25            | 1             | 0           | 3.654379                | 0.423026  | -0.689365 |

Zero-point correction= 0.206345 (Hartree/Particle)  
 Thermal correction to Energy= 0.219689  
 Thermal correction to Enthalpy= 0.220633  
 Thermal correction to Gibbs Free Energy= 0.166479  
 Sum of electronic and zero-point Energies= -552.734049  
 Sum of electronic and thermal Energies= -552.720705  
 Sum of electronic and thermal Enthalpies= -552.719761  
 Sum of electronic and thermal Free Energies= -552.773915

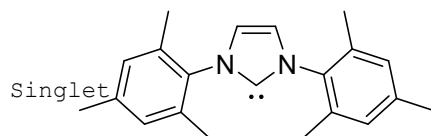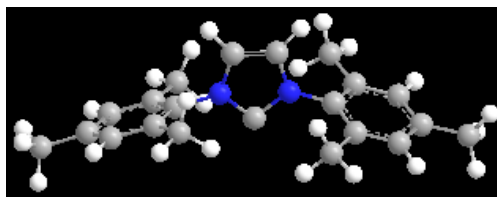

| Center Number | Atomic Number | Atomic Type | Coordinates (Angstroms) |           |           |
|---------------|---------------|-------------|-------------------------|-----------|-----------|
|               |               |             | X                       | Y         | Z         |
| 1             | 6             | 0           | -0.000351               | 0.002423  | -0.293081 |
| 2             | 7             | 0           | 1.057839                | -0.009236 | 0.576339  |
| 3             | 6             | 0           | 0.676847                | -0.008267 | 1.916533  |
| 4             | 6             | 0           | -0.673702               | 0.006547  | 1.917750  |
| 5             | 7             | 0           | -1.057045               | 0.011429  | 0.578171  |
| 6             | 6             | 0           | -2.420538               | 0.022359  | 0.152941  |
| 7             | 6             | 0           | 2.420793                | -0.020510 | 0.149371  |
| 8             | 6             | 0           | -3.141809               | -1.175066 | 0.158132  |
| 9             | 6             | 0           | -4.476892               | -1.137461 | -0.239814 |
| 10            | 6             | 0           | -5.088048               | 0.049902  | -0.642896 |
| 11            | 6             | 0           | -4.331889               | 1.221622  | -0.641650 |
| 12            | 6             | 0           | -2.994405               | 1.231612  | -0.249641 |
| 13            | 6             | 0           | 2.992572                | -1.229914 | -0.257826 |
| 14            | 6             | 0           | 4.327050                | -1.219596 | -0.657532 |
| 15            | 6             | 0           | 5.085234                | -0.048271 | -0.657003 |
| 16            | 6             | 0           | 4.473855                | 1.139856  | -0.258843 |
| 17            | 6             | 0           | 3.140689                | 1.176998  | 0.147860  |
| 18            | 6             | 0           | -2.180973               | 2.489378  | -0.267966 |
| 19            | 6             | 0           | -2.487363               | -2.459963 | 0.567256  |
| 20            | 6             | 0           | -6.517631               | 0.059190  | -1.096983 |
| 21            | 6             | 0           | 6.529874                | -0.073703 | -1.059769 |
| 22            | 6             | 0           | 2.485404                | 2.463277  | 0.551141  |
| 23            | 6             | 0           | 2.176082                | -2.485632 | -0.280791 |
| 24            | 1             | 0           | 1.398333                | -0.016623 | 2.724280  |
| 25            | 1             | 0           | -1.393689               | 0.012574  | 2.726857  |
| 26            | 1             | 0           | -5.054130               | -2.064439 | -0.241218 |
| 27            | 1             | 0           | -4.796388               | 2.158172  | -0.956974 |
| 28            | 1             | 0           | 4.787623                | -2.154899 | -0.982502 |
| 29            | 1             | 0           | 5.048054                | 2.068484  | -0.271682 |
| 30            | 1             | 0           | -2.793139               | 3.353040  | -0.552061 |
| 31            | 1             | 0           | -1.730411               | 2.694125  | 0.713848  |
| 32            | 1             | 0           | -1.348984               | 2.401359  | -0.979991 |
| 33            | 1             | 0           | -2.274065               | -2.486814 | 1.645240  |
| 34            | 1             | 0           | -3.127228               | -3.318362 | 0.332624  |
| 35            | 1             | 0           | -1.524545               | -2.593703 | 0.054504  |
| 36            | 1             | 0           | -7.123006               | -0.667347 | -0.540500 |
| 37            | 1             | 0           | -6.973725               | 1.049048  | -0.971840 |
| 38            | 1             | 0           | -6.598503               | -0.202820 | -2.161507 |
| 39            | 1             | 0           | 6.715996                | -0.819410 | -1.842859 |
| 40            | 1             | 0           | 6.863001                | 0.902368  | -1.433344 |
| 41            | 1             | 0           | 7.175605                | -0.333018 | -0.208610 |
| 42            | 1             | 0           | 3.125926                | 3.320955  | 0.315691  |
| 43            | 1             | 0           | 1.523712                | 2.595655  | 0.035928  |
| 44            | 1             | 0           | 2.269628                | 2.492965  | 1.628556  |

|    |   |   |          |           |           |
|----|---|---|----------|-----------|-----------|
| 45 | 1 | 0 | 1.730861 | -2.696233 | 0.702233  |
| 46 | 1 | 0 | 1.340048 | -2.390433 | -0.987122 |
| 47 | 1 | 0 | 2.784668 | -3.348688 | -0.574241 |

-----

Zero-point correction= 0.396943 (Hartree/Particle)  
 Thermal correction to Energy= 0.419994  
 Thermal correction to Enthalpy= 0.420938  
 Thermal correction to Gibbs Free Energy= 0.344029  
 Sum of electronic and zero-point Energies= -923.043939  
 Sum of electronic and thermal Energies= -923.020888  
 Sum of electronic and thermal Enthalpies= -923.019943  
 Sum of electronic and thermal Free Energies= -923.096853

PCy<sub>3</sub>

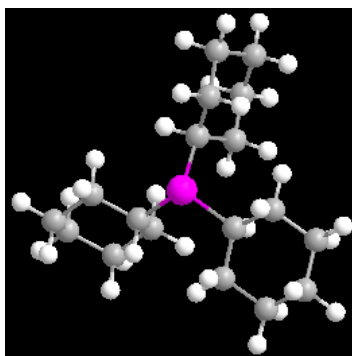

-----

| Center<br>Number | Atomic<br>Number | Atomic<br>Type | Coordinates (Angstroms) |           |           |
|------------------|------------------|----------------|-------------------------|-----------|-----------|
|                  |                  |                | X                       | Y         | Z         |
| 1                | 15               | 0              | 0.002014                | -0.123292 | -1.057849 |
| 2                | 6                | 0              | 0.088998                | 1.605761  | -0.299268 |
| 3                | 6                | 0              | -1.317348               | -0.990815 | -0.044795 |
| 4                | 6                | 0              | 1.580706                | -0.926650 | -0.438084 |
| 5                | 6                | 0              | -0.416060               | 1.788356  | 1.133861  |
| 6                | 6                | 0              | -0.240258               | 3.229525  | 1.608230  |
| 7                | 6                | 0              | -0.940203               | 4.206384  | 0.671640  |
| 8                | 6                | 0              | -0.430268               | 4.044608  | -0.754456 |
| 9                | 6                | 0              | -0.592827               | 2.607952  | -1.240101 |
| 10               | 6                | 0              | -1.252822               | -2.508088 | -0.243034 |
| 11               | 6                | 0              | -2.383896               | -3.219900 | 0.494739  |
| 12               | 6                | 0              | -3.748284               | -2.687967 | 0.074999  |
| 13               | 6                | 0              | -3.823319               | -1.179512 | 0.274102  |
| 14               | 6                | 0              | -2.696042               | -0.474747 | -0.472531 |
| 15               | 6                | 0              | 1.868232                | -0.899918 | 1.062615  |
| 16               | 6                | 0              | 3.132284                | -1.689154 | 1.395621  |
| 17               | 6                | 0              | 4.329577                | -1.155054 | 0.618057  |
| 18               | 6                | 0              | 4.056184                | -1.163965 | -0.881533 |
| 19               | 6                | 0              | 2.784568                | -0.390366 | -1.219633 |
| 20               | 1                | 0              | 1.169225                | 1.848124  | -0.303571 |
| 21               | 1                | 0              | -1.183490               | -0.781298 | 1.031467  |
| 22               | 1                | 0              | 1.461099                | -1.984449 | -0.739533 |
| 23               | 1                | 0              | -1.488732               | 1.533428  | 1.184586  |
| 24               | 1                | 0              | 0.098259                | 1.101550  | 1.820925  |
| 25               | 1                | 0              | -0.619941               | 3.337339  | 2.634704  |
| 26               | 1                | 0              | 0.836308                | 3.470708  | 1.644963  |
| 27               | 1                | 0              | -2.026148               | 4.008811  | 0.691739  |

-----

|    |   |   |           |           |           |
|----|---|---|-----------|-----------|-----------|
| 28 | 1 | 0 | -0.803216 | 5.240772  | 1.017826  |
| 29 | 1 | 0 | -0.948855 | 4.736610  | -1.433654 |
| 30 | 1 | 0 | 0.639308  | 4.315750  | -0.787957 |
| 31 | 1 | 0 | -1.669009 | 2.367250  | -1.310175 |
| 32 | 1 | 0 | -0.190554 | 2.495180  | -2.257483 |
| 33 | 1 | 0 | -1.318839 | -2.732675 | -1.323259 |
| 34 | 1 | 0 | -0.285925 | -2.906420 | 0.098873  |
| 35 | 1 | 0 | -2.320905 | -4.304330 | 0.324318  |
| 36 | 1 | 0 | -2.254597 | -3.065685 | 1.580003  |
| 37 | 1 | 0 | -3.913517 | -2.918619 | -0.991475 |
| 38 | 1 | 0 | -4.548898 | -3.194376 | 0.632864  |
| 39 | 1 | 0 | -4.797414 | -0.792461 | -0.058032 |
| 40 | 1 | 0 | -3.743944 | -0.948547 | 1.350703  |
| 41 | 1 | 0 | -2.813685 | -0.644612 | -1.557737 |
| 42 | 1 | 0 | -2.769905 | 0.613460  | -0.323601 |
| 43 | 1 | 0 | 2.011025  | 0.145453  | 1.388047  |
| 44 | 1 | 0 | 1.013805  | -1.293058 | 1.634668  |
| 45 | 1 | 0 | 3.328109  | -1.656665 | 2.477205  |
| 46 | 1 | 0 | 2.972709  | -2.750481 | 1.137286  |
| 47 | 1 | 0 | 4.533095  | -0.119264 | 0.941071  |
| 48 | 1 | 0 | 5.232724  | -1.737594 | 0.849616  |
| 49 | 1 | 0 | 4.911980  | -0.747690 | -1.432340 |
| 50 | 1 | 0 | 3.941808  | -2.207199 | -1.222426 |
| 51 | 1 | 0 | 2.940482  | 0.675457  | -0.974185 |
| 52 | 1 | 0 | 2.582107  | -0.433787 | -2.300278 |

-----

|                                              |                             |
|----------------------------------------------|-----------------------------|
| Zero-point correction=                       | 0.483027 (Hartree/Particle) |
| Thermal correction to Energy=                | 0.502178                    |
| Thermal correction to Enthalpy=              | 0.503122                    |
| Thermal correction to Gibbs Free Energy=     | 0.436236                    |
| Sum of electronic and zero-point Energies=   | -1046.076021                |
| Sum of electronic and thermal Energies=      | -1046.056870                |
| Sum of electronic and thermal Enthalpies=    | -1046.055925                |
| Sum of electronic and thermal Free Energies= | -1046.122812                |

## References

- (1) Zhang, Q.; Xu, W.; Lu, X. *J. Org. Chem.* **2005**, *70*, 1505 - 1507.
- (2) Schiller, R.; Pour, M.; FÁková, H.; Kuneš, J.; CÍsařová, I. *J. Org. Chem.* **2004**, *69*, 6761 - 6765.
- (3) Buisine, O.; Aubert, C.; Malacria, M. *Chem. Eur. J.* **2001**, *7*, 3517 - 3525.
- (4) Liu, R.; Winston-McPherson, G. N.; Yang, Z-Y.; Zhou, X.; Song, W.; Guzei, I. A.; Xu, X.; Tang, W. *J. Am. Chem. Soc.* **2013**, *135*, 8201-8204.
- (5) Kavanagh, Y.; Chaney, C. M.; Muldoon, J.; Evans, P. *J. Org. Chem.* **2008**, *73*, 8601-8604.

- (6) (a) Pardo-Rodríguez, V.; Buñuel, E.; Collado-Sanz, D.; Cárdenas, D. J. *Chem. Commun.* **2012**, 48, 10517-10519. (b) Schiller, R.; Pour, M.; Fáková, H.; Kuneš, J.; Císařová, I. *J. Org. Chem. Soc.*, 2004, **69**, 6761-6765.
- (7) López-Durán, R.; Martos-Redruejo, A.; Buñuel, E.; Cárdenas, D. J. *Chem. Commun.* **2013**, 49, 10691-10693.
- (8) Trost, B. M.; Machacek, M. R.; Faulk, B. D. *J. Am. Chem. Soc.*, **2006**, 128, 6745–6754.
- (9) Trost, B. M.; Sacchi, K. L.; Schroeder, G. M.; Asakawa, N. *Org. Lett.* **2002**, 4, 3427-3430.
- (10) Fernández-Rivas, C.; Méndez, M.; Nieto-Oberhuber, C.; Echavarren, A. M. *J. Org. Chem.* **2002**, 67, 5197 – 5201.
- (11) Peppers, B. P.; Diver, S.T. *J. Am. Chem. Soc.*, **2004**, 126, 9524–9525.
- (12) Zhou, H.; Moberg, C. *J. Am. Chem. Soc.* **2012**, 134, 15992 – 15999.
- (13) Pilkington, L. I.; Barker, D. *J. Org. Chem.* **2012**, 77, 8156 - 8166.
- (14) Lee, J. C.; H.; Hall, D. G. *Tetrahedron Lett.* **2011**, 52, 321-324.
- (15) Gaussian 09, Revision D.01, Frisch, M. J.; Trucks, G. W.; Schlegel, H. B.; Scuseria, G. E.; Robb, M. A.; Cheeseman, J. R.; Scalmani, G.; Barone, V.; Mennucci, B.; Petersson, G. A.; Nakatsuji, H.; Caricato, M.; Li, X.; Hratchian, H. P.; Izmaylov, A. F.; Bloino, J.; Zheng, G.; Sonnenberg, J. L.; Hada, M.; Ehara, M.; Toyota, K.; Fukuda, R.; Hasegawa, J.; Ishida, M.; Nakajima, T.; Honda, Y.; Kitao, O.; Nakai, H.; Vreven, T.; Montgomery, J. A., Jr.; Peralta, J. E.; Ogliaro, F.; Bearpark, M.; Heyd, J. J.; Brothers, E.; Kudin, K. N.; Staroverov, V. N.; Kobayashi, R.; Normand, J.; Raghavachari, K.; Rendell, A.; Burant, J. C.; Iyengar, S. S.; Tomasi, J.; Cossi, M.; Rega, N.; Millam, N. J.; Klene, M.; Knox, J. E.; Cross, J. B.; Bakken, V.; Adamo, C.; Jaramillo, J.; Gomperts, R.; Stratmann, R. E.; Yazyev, O.; Austin, A. J.; Cammi, R.; Pomelli, C.; Ochterski, J. W.; Martin, R. L.; Morokuma, K.; Zakrzewski, V. G.; Voth, G. A.; Salvador, P.; Dannenberg, J. J.; Dapprich, S.; Daniels, A. D.; Farkas, Ö.; Foresman, J. B.; Ortiz, J. V.; Cioslowski, J.; Fox, D. J. Gaussian, Inc., Wallingford CT, 2009.
- (16) Tomasi, J.; Mennucci, B.; Cammi, R. “Quantum mechanical continuum solvation models,” *Chem. Rev.*, 105 (2005) 2999-3093.
- (17) Zhao, Y.; Truhlar, D. G. “The M06 suite of density functionals for main group thermochemistry, thermochemical kinetics, noncovalent interactions, excited states, and transition elements: two new functionals and systematic testing of four M06-class functionals and 12 other functionals,” *Theor. Chem. Acc.*, 120 (2008) 215-41.

Comment [R]: Reaction conditions from:

(18) (a) Becke, A. D. *J. Chem. Phys.* 1993, 98, 5648- 5653. (b) Becke, A. D. *Phys. Rev. A* 1988, 38, 3098-3100. (c) Lee, C.; Yang, W.; Parr, R. G. *Phys. Rev. B* 1988, 37, 785-789.
